# Supplementary material for: Genetic Associations and Architecture of Asthma-COPD Overlap
Source: PubMed Central journal article supplement (PMC9131047; doi:10.1016/j.chest.2021.12.674), 2022-01-31
Supplement: mmc1.pdf [file mmc1.pdf]

## Genetic Associations and Architecture of Asthma-COPD Overlap

*Catherine John, MBBChir; Anna L. Guyatt, MBChB, PhD; Nick Shrine, PhD; Richard Packer, MBBS; Thorunn A. Olafsdottir, PhD; Jiangyuan Liu, PhD; Lystra P. Hayden, MD; Su H. Chu, PhD; Jukka T. Koskela, MD, PhD; Jian'an Luan, PhD; Xingnan Li, PhD; Natalie Terzikhan, PhD; Hanfei Xu, PhD; Traci M. Bartz, MS; Hans Petersen, MS; Shuguang Leng, MD, PhD; Steven A. Belinsky, PhD; Aivaras Cepelis, PhD; Ana I. Hernández Cordero, PhD; Ma'en Obeidat, BSPHarm, PhD; Gudmar Thorleifsson, PhD; Deborah A. Meyers, PhD; Eugene R. Bleecker, MD; Lori C. Sakoda, PhD; Carlos Iribarren, MD, PhD; Yohannes Tesfaigzi, PhD; Sina A. Gharib, MD; Josée Dupuis, PhD; Guy Brusselle, MD, PhD; Lies Lahousse, PhD; Victor E. Ortega, MD, PhD; Ingileif Jonsdottir, PhD; Don D. Sin, MD; Yohan Bossé, PhD; Maarten van den Berge, MD, PhD; David Nickle, PhD; Jennifer K. Quint, MBBS, PhD; Ian Sayers, PhD; Ian P. Hall, MBBCh, PhD; Claudia Langenberg, MD, PhD; Samuli Ripatti, PhD; Tarja Laitinen, MD, PhD; Ann C. Wu, MD; Jessica Lasky-Su, ScD; Per Bakke, MD; Amund Gulsvik, MD, PhD; Craig P. Hersh, MD; Caroline Hayward, PhD; Arnulf Langhammer, MD, PhD; Ben Brumpton, MD, PhD; Kari Stefansson, MD, PhD; Michael H. Cho, MD; Louise V. Wain, PhD; and Martin D. Tobin, MBChB, PhD*

CHEST 2022; 161(5):1155-1166

*Online supplements are not copyedited prior to posting and the author(s) take full responsibility for the accuracy of all data.*

# Supplementary Material

**Supplementary Tables 1-12 are included at the end of the online supplement.**

## Contents

|                                                                                                                                                                                                         |    |
|---------------------------------------------------------------------------------------------------------------------------------------------------------------------------------------------------------|----|
| e-Appendix .....                                                                                                                                                                                        | 3  |
| Previous signals for risk of asthma or COPD (including lung function) .....                                                                                                                             | 3  |
| Study Descriptions.....                                                                                                                                                                                 | 3  |
| Supplementary Methods: Stage 1.....                                                                                                                                                                     | 6  |
| Data source and study population .....                                                                                                                                                                  | 6  |
| Case and control selection .....                                                                                                                                                                        | 6  |
| Identification of distinct signals.....                                                                                                                                                                 | 7  |
| Supplementary Methods: Stage 2 and joint analysis.....                                                                                                                                                  | 7  |
| Studies and meta-analysis.....                                                                                                                                                                          | 7  |
| Validation of asthma diagnosis definition for Stage 2 .....                                                                                                                                             | 7  |
| Sensitivity analysis.....                                                                                                                                                                               | 7  |
| Signal fine-mapping and bioinformatic analyses.....                                                                                                                                                     | 8  |
| Supplementary Results.....                                                                                                                                                                              | 9  |
| Signal selection.....                                                                                                                                                                                   | 9  |
| Sensitivity analysis.....                                                                                                                                                                               | 9  |
| Study acknowledgements and funding .....                                                                                                                                                                | 10 |
| e-Figure 1: Quantile-quantile plot of ACO GWAS results from discovery analysis in UK Biobank.....                                                                                                       | 14 |
| e-Figure 2: Flowchart detailing the signal selection process in the UK Biobank discovery analysis ....                                                                                                  | 15 |
| e-Figure 3 Scatterplots comparing effects in 31 signals taken forward for replication, with results when ACO cases are split into those with adult- (>25 years) and child-onset (<12 years) asthma..... | 16 |
| e-Figure 4 Scatterplots comparing effects in 31 signals taken forward for replication, with smoking-stratified results (by ever- and never-smokers).....                                                | 19 |
| e-Figure 5 Region plots for eight signals taken forward for downstream analyses.....                                                                                                                    | 22 |
| rs80101740.....                                                                                                                                                                                         | 22 |
| rs35570272.....                                                                                                                                                                                         | 22 |
| rs16903574.....                                                                                                                                                                                         | 23 |
| rs2584662.....                                                                                                                                                                                          | 23 |
| rs1837253.....                                                                                                                                                                                          | 23 |
| rs6787279.....                                                                                                                                                                                          | 24 |
| rs9273410.....                                                                                                                                                                                          | 24 |
| rs3749833.....                                                                                                                                                                                          | 24 |

|                                                                                                                                      |    |
|--------------------------------------------------------------------------------------------------------------------------------------|----|
| e-Figure 6 Forest plots for eight signals taken forward for downstream analyses (results from Stage 1 + Stage 2 joint analysis)..... | 25 |
| rs80101740.....                                                                                                                      | 25 |
| rs35570272.....                                                                                                                      | 26 |
| rs16903574.....                                                                                                                      | 27 |
| rs2584662.....                                                                                                                       | 28 |
| rs1837253.....                                                                                                                       | 29 |
| rs6787279.....                                                                                                                       | 30 |
| rs9273410.....                                                                                                                       | 31 |
| rs3749833.....                                                                                                                       | 32 |
| References.....                                                                                                                      | 33 |

## e-Appendix

### Previous signals for risk of asthma or COPD (including lung function)

References for GWAS publications detailing loci associated with risk of asthma or COPD (as mentioned in the main text introduction) are given in <sup>1-41</sup>.

### Study Descriptions

The **Cardiovascular Health Study (CHS)** is a population-based cohort study of risk factors for coronary heart disease and stroke in adults  $\geq 65$  years conducted across four field centers.<sup>42</sup> The original predominantly European ancestry cohort of 5,201 persons was recruited in 1989-1990 from random samples of the Medicare eligibility lists; subsequently, an additional predominantly African-American cohort of 687 persons was enrolled for a total sample of 5,888. Blood samples were drawn from all participants at their baseline examination and DNA was subsequently extracted from available samples. Genotyping was performed at the General Clinical Research Center's Phenotyping/Genotyping Laboratory at Cedars-Sinai among CHS participants who consented to genetic testing and had DNA available using the Illumina 370CNV BeadChip system (for European ancestry participants, in 2007) or the Illumina HumanOmni1-Quad\_v1 BeadChip system (for African-American participants, in 2010). Only European ancestry participants were included in this analysis due to low numbers of African-Americans with the outcome. For European ancestry participants in this analysis, spirometry values to define COPD and self-reported asthma are from the 1989-1990 exam. CHS was approved by institutional review committees at each field center and individuals in the present analysis had available DNA and gave informed consent including consent to use of genetic information for the study of cardiovascular disease.

**COPDGene:** Eligible subjects in COPDGene Study (NCT00608764, [www.copdgene.org](http://www.copdgene.org)) were of nonHispanic white (NHW) or African-American (AA) ancestry, aged 45-80 years old, with at least 10 packyears of smoking and no diagnosed lung disease other than COPD or asthma.<sup>29,43</sup> IRB approval was obtained at all study centers, and all study participants provided written informed consent. Illumina (San Diego, CA) performed genotyping on the HumanOmniExpress array.

**deCODE:** The Icelandic GWAS is based on 32.5 million variants identified through whole-genome sequencing of 28,075 Icelandic individuals and subsequently imputed for 155,250 Icelandic individuals, genotyped using the Illumina SNP chips, as well as 285,664 of their first- and second-degree relatives as previously described.<sup>44</sup> All participating individuals who donated blood signed informed consent. The personal identities of participants were encrypted using a third-party system approved and monitored by the Icelandic Data Protection Authority.<sup>45</sup> The study was approved by the National Bioethics Committee in Iceland (Approval no. VSN 19-157 and VSN 15-099).

The Icelandic spirometry data were collected from records at the Department of Respiratory Medicine and Sleep, Landspítali, the University Hospital of Iceland and from a health study performed by deCODE genetics at the participant recruitment center. Spirometry was performed using the EasyOne Pro equipment from ndd Medical Technologies in a standardized manner and following published guidelines <https://www.atsjournals.org/doi/10.1164/rccm.201908-1590ST>.

**ECLIPSE:** Evaluation of COPD Longitudinally to Identify Predictive Surrogate End-points (ECLIPSE; SCO104960, NCT00292552, [www.eclipse-copd.com](http://www.eclipse-copd.com)): Details of the ECLIPSE study and genome-wide association 4 analysis have been described previously.<sup>46</sup> The ECLIPSE study was approved by the relevant ethics and review boards at the participating clinical centers. All participants provided

written informed consent. Cases and controls were aged 40-75 with at least a 10 pack-year smoking history without other respiratory diseases. Genotyping was performed using the Illumina HumanHap 550 V3 (Illumina, San Diego, CA).

**European Prospective Investigation of Cancer (EPIC)-Norfolk** (DOI 10.22025/2019.10.105.00004) is a prospective population-based cohort study which recruited 25,639 men and women aged 40-79 years at baseline between 1993 and 1997 from 35 participating general practices in Norfolk, UK.<sup>47</sup> Individuals attended for a baseline health check including the provision of blood samples for concurrent and future analysis. Further health check visits have been conducted since the baseline visit. Participants have contributed information about their diet, lifestyle and health through questionnaires and health checks over two decades. DNA has been extracted from all EPIC participants and stored blood has been analysed for an extensive range of classical and novel biomarkers. Sample quality control was performed including gender check, relatedness check, and ancestry check. The Norwich Local Research Ethics Committee granted ethical approval for the study. All participants gave written informed consent.

**FinnCAD/Generisk:** The Finnish Chronic Obstructive Airway Disease (CAD) cohort has been enrolled through the Pulmonary Clinics of Helsinki and Turku University Hospitals during the years 2005-2007.<sup>48</sup> All out- and inpatients aged 18-75 years who had been discharged with a diagnosis of asthma or COPD (ICD10 code J44-J46) were invited to the study and 1855 patients participated. Three hundred twenty one of the patients full filled both asthma and COPD criteria and were included to the study. The Coordinating Ethics Committee of the Helsinki and Uusimaa Hospital District (Coordinating Ethics Committee decision 125/E0/04) has approved the study, and the permission to conduct research was granted by the Helsinki and Turku University Hospitals. Controls for this study were selected from the Generisk cohort. The GeneRISK study is being carried out according to the principles of the Helsinki declaration and the Council of Europe's (COE) Convention of Human Rights and Biomedicine. All study participants have given their informed consent that permits the use of collected samples and data for the original study and for biobank research through THL Biobank, and the study protocol has been approved by the Ethical Committee of the Helsinki and Uusimaa Hospital district on 9 December 2014.

**Framingham Heart Study (FHS; NCT00005121):** Details on pulmonary function in the FHS have been previously published.<sup>22,27</sup> FHS was IRB-approved at the relevant institutions, and all participants provided written informed consent. We analyzed data from the most recent exam for each of the three generations of families participating in the FHS were analyzed. Genotypes were from the Affymetrix 500K array supplemented by the Affymetrix MIPS 50K.

**Generation Scotland** is a multi-institution collaboration that has created an ethically sound, family-based and population-based resource for identifying the genetic basis of common complex diseases.<sup>49</sup> The Scottish Family Health Study component (GS:SFHS) has DNA and sociodemographic, psychological and clinical data from ~24,000 adult volunteers from across Scotland. The ethnicity of the cohort is 99% Caucasian, with 96% born in the UK and 87% in Scotland. Features of GS:SFHS include the family-based recruitment, breadth and depth of phenotype information, 'broad' consent from participants to use their data and samples for a wide range of medical research and for re-contact, and consent and mechanisms for linkage of all data to comprehensive routine healthcare records. These features were designed to maximise the power of the resource to identify, replicate or control for genetic factors associated with a wide spectrum of illnesses and risk factors. GS:SFHS has Research Tissue Bank status from the East of Scotland Research Ethics Service (REC Reference Number: 15/ES/0040). This provides a favourable opinion for a wide range of data and sample uses within medical research. Research that includes access to individual-level EHR data is notified to the

Research Ethics Committee by the GS management team on behalf of the researchers, through a notice of substantial amendment. Only data from those GS:SFHS participants who gave written informed consent for record linkage of their GS:SFHS study data to their medical records are used.

**GenKOLS (Norway):** The Norwegian GenKOLS (Genetics of Chronic Obstructive Lung Disease, GSK code RES11080) recruited subjects with > 2.5 pack years of smoking history from Bergen, Norway.<sup>50</sup> Subjects with severe alpha-1 antitrypsin deficiency and other lung diseases (aside from asthma) were excluded. The Regional Committee for Medical Research Ethics (REK Vest), the Norwegian Data Inspectorate and the Norwegian Department of Health approved the case-control study. Written informed consent was obtained from all participants. Genotyping was performed using Illumina HumanHap550 arrays (Illumina, San Diego, CA).

**GERA:** This study utilized genome-wide genetic data available on the Genetic Epidemiology Resource in Adult Health and Aging (GERA) cohort of 110,266 adult male and female Kaiser Permanente of Northern California (KPNC) members. The cohort has been described in detail elsewhere.<sup>51</sup> In brief, the GERA cohort was formed by including all racial and ethnic minority participants in the larger cohort of the Research Program on Genes, Environment and Health (RPGEH) with saliva samples (19% of the total); the remaining participants were drawn randomly from White non-Hispanic participants (81% of the total). All RPGEH participants responded to a self-administered questionnaire in 2007/08 that included information on medical history, ancestry, health behaviors (smoking, alcohol consumption, diet, physical activity and reproductive history) and current weight and height. Asthma and COPD phenotypes were derived from the KPNC electronic health record and linked with the genetic data by virtue of the unique medical record number. The institutional review boards for human subject research of both KPNC and University of California, San Francisco (UCSF), approved the project (AG036607; Schaefer/Risch, PIs).

**HUNT:** The Trøndelag Health Study (HUNT)<sup>52</sup> is a population-based health survey conducted in the county of Nord Trøndelag, Norway. Individuals were included at four different time points during approximately 20 years (HUNT1 [1984-1986], HUNT2 [1995-1997], HUNT3 [2006-2008]) and HUNT4 [2017-2019])(PMID: 22879362). At each time point, the entire adult population ( $\geq$  20 years) was invited to participate by completing questionnaires, attending clinical examinations and interviews. Participation rates have generally been high: 89.4% (n = 77,212), 69.5% (n = 65,237), 54.1% (n = 50,807) and 54.0% (n=56,042) in HUNT1, HUNT2, HUNT3 and HUNT4, respectively (PMID: 22879362). Taken together, the health studies include information from over 120,000 different individuals from Nord-Trøndelag. Biological samples including DNA have been collected for approximately 90,000 participants. Participation was based on informed, written consent, and the study was approved by the Regional Committee for Medical and Health Research (#2015/616-1 REK midt). In addition, the HUNT Study was approved by the Norwegian Data Inspectorate.

**Lovelace:** The Lovelace Smokers Cohort (LSC) has been actively enrolling smokers from the Albuquerque, NM metropolitan area since 2001.<sup>53</sup> All participants provided written informed consent, and the study was approved by the relevant IRB. Enrollment was restricted to current and former smokers age 40 to 74 years old with a minimum of 10 pack-years of smoking and no personal history of lung cancer. A detailed questionnaire written in English was used to collect information on demographics; medical, cigarette smoking, and exposure history; socioeconomic status; diet; and quality of life. Pulmonary function testing was performed at each visit. All participants signed a consent form, and the Western Institutional Review Board approved this project. The GWAS discovery set was comprised of 1200 Caucasian (self-reported) smokers. The HumanOmni2.5-4v1-H BeadChip (Illumina, San Diego, CA) was used to genotype 2,450,000 SNPs in 1200 Caucasian smokers from the LSC.

**MGB-Biobank:** The Massachusetts General and Brigham Biobank (MGB-Biobank) Biobank is a large bio-repository that provides access to research data and approximately 90,000 high-quality banked samples (plasma, serum, and DNA) from >129,000 consented patients enrolled in the Partners Healthcare system, that enable these samples to be linked to corresponding Electronic Medical Record (EMR) data in addition to survey data on lifestyle, environment, and family history. The protocol for this study was approved by the Brigham and Women's Hospital and the Mass General Brigham institutional review boards.

The **Rotterdam Study** is a prospective population-based cohort study founded in 1990 in a suburb of Rotterdam, the Netherlands.<sup>54,55</sup> The first cohort (RS-I) consists of 7,983 participants, aged 55 years and over. The second cohort (RS-II) was recruited in 2000 with the same inclusion criteria. The third cohort (RS-III) consists of 3,932 participants, aged 45 years and over and was recruited in 2006. The Rotterdam Study was approved by the institutional review board (Medical Ethics Committee) of the Erasmus Medical Center and by the review board of The Netherlands Ministry of Health, Welfare and Sports. All participants provided written informed consent. Spirometry was performed using the Master Screen® PFT Pro (CareFusion, San Diego, CA). A total of 6,291 subjects for RS I, 2,157 for RS II and 3,048 for RS III passed genotyping quality control.

**SPIROMICS** is a prospective cohort (n=2,981) with the goal to identify COPD subphenotypes and biomarkers of disease progression.<sup>56</sup> SPIROMICS is a well-characterized longitudinal cohort with comprehensive phenotyping including measurements of lung function and quantitative CT scans. Smokers with COPD were defined as smokers (smoking ≥20 packs/year) with post-bronchodilator FEV<sub>1</sub>/FVC <0.7 (GOLD stage 1-4) and 'healthy' smoking controls were defined as smokers (smoking ≥20 packs/year) with post-bronchodilator FEV<sub>1</sub>/FVC ≥0.7 (GOLD stage 0). Healthy non-smoking controls were also recruited. Participants were recruited at each center using a common detailed protocol ([www.spiromics.com](http://www.spiromics.com)). The study was approved by the institutional review boards of all participating sites with written informed consent from all participants. DNA was isolated using standard protocols, SNP genotyping performed using Illumina HumanOmniExpressExome BeadChip and BeadStudio (Illumina, Inc., San Diego, CA), and quality control and genetic association analysis were described previously.<sup>57</sup>

## Supplementary Methods: Stage 1

### Data source and study population

Individuals were eligible for inclusion in this study if they met the following criteria: (i) had data on age, sex and height; (ii) had spirometry that met quality control requirements (acceptability, reproducibility and blow curve metrics); (iii) had genome-wide imputed genetic data that met quality control requirements; and (iv) were of European ancestry based on *k*-means clustering after principal components analysis. Quality control processes have been described previously.<sup>58</sup>

Genotyping was undertaken using the Affymetrix Axiom® UK BiLEVE array and the Affymetrix Axiom® UK Biobank array,<sup>30</sup> with imputation to the Haplotype Reference Consortium panel.<sup>59</sup>

### Case and control selection

Individuals were selected as cases of ACO if they had evidence of asthma from either the touchscreen questionnaire (UK Biobank data field 6152, "Has a doctor ever told you that you have had any of the following conditions? You can select more than one answer") or verbal interview with a trained nurse (field 20002) AND FEV<sub>1</sub>/FVC <0.7 with classification of airflow limitation GOLD 2+ (FEV<sub>1</sub> <80% of predicted) at any study visit. Individuals were excluded from the cases if they reported a diagnosis of alpha-1-antitrypsin deficiency in the verbal interview (field 20002) at any study visit.

Where there were related pairs within the cases (second degree or closer), the individual with the lower genotype call rate was excluded.

Controls were free of both asthma and COPD, based on no reported bronchitis, emphysema or asthma on the touchscreen questionnaire, and no reported asthma, COPD, emphysema/chronic bronchitis, bronchitis, emphysema, alpha-1-antitrypsin deficiency on the verbal interview. Controls had  $FEV_1 \geq 80\%$  predicted and  $FEV_1/FVC > 0.7$ . Individuals related to cases were excluded, and where pairs of controls were related, the individual with the lower genotype call rate was excluded (as for cases). Controls were randomly selected in a ratio of five to each case.

### Identification of distinct signals

In stage 1, we sought to defined distinct signals across the genome passing a P-value threshold of  $P < 5 \times 10^{-6}$ .

We defined regions of association around the most strongly associated variant (sentinel variant)  $\pm 1$ Mb. First, sentinel variants and regions of association were identified by taking the variant with the lowest P-value and extracting this sentinel variant and the surrounding region  $\pm 1$ Mb. Then, the variant with the next lowest P-value outside this region was identified, proceeding iteratively until there were no further variants with a P-value less than  $5 \times 10^{-6}$ . All coordinates are given according to GRCh37.

To identify distinct signals, and additional signals within the regions described above, conditional analyses were undertaken using GCTA-COJO (<http://cnsgenomics.com/software/gcta/#COJO>). For non-HLA sentinel variants, GCTA-COJO was used to implement a joint, stepwise selection procedure for each of the sentinels and its corresponding 2Mb surrounding region. For the HLA region, one conditional analysis was performed for the region of chr6:26,000,000-34,000,000.

### Supplementary Methods: Stage 2 and joint analysis

#### Studies and meta-analysis

Studies undertook logistic regression with ACO as the outcome, using an additive genetic model, and adjusting for age, sex and, where available, smoking status. An appropriate number of ancestry principal components were also included, or a mixed linear model used to account for fine-scale population structure or familial relatedness. Proxies ( $r^2 > 0.3$ ) were provided if SNPs were missing, or if a SNP was poorly imputed (info  $< 0.5$ ) in a study (see **e-Table 3**).

#### Validation of asthma diagnosis definition for Stage 2

In Stage 2 analyses, we permitted asthma to be diagnosed by either self-report of doctor-diagnosed asthma, or a diagnosis from the electronic healthcare record. We undertook pilot work to compare prevalence of ACO defined in UK Biobank, using self-report of asthma (not necessarily doctor-diagnosed), and in the EXCEED cohort,<sup>60</sup> using asthma codes identified from primary care data. GOLD2+ spirometry was used to define COPD in both cohorts. The proportion of ACO cases amongst individuals with spirometry data passing quality control was very similar in both studies (2.5% in UK Biobank, 2.4% in EXCEED).

#### Sensitivity analysis

In addition to the main meta-analysis, we undertook a sensitivity meta-analysis in which we varied the definition of COPD.

We expanded the definition of COPD to include a diagnosis in the healthcare record (including billing codes) in three cohorts already included in the main analysis where this information was also available (deCODE, HUNT, Rotterdam), and in three additional cohorts which were not included in



the main analysis, due to lack of spirometry data (FinnCAD/Generisk, GERA, MGB Biobank). Thus, in the sensitivity analysis, cases of ACO had COPD defined either by spirometry (if available) or by a diagnosis in the healthcare record (in addition to evidence of asthma).

Controls had either normal spirometry (if available) or absence of a COPD diagnosis in the healthcare record (in addition to no evidence of asthma) (**e-Appendix**).

As in the main analysis, studies undertook logistic regression with ACO as the outcome, using an additive genetic model, and adjusting for age, sex and, where available, smoking status. An appropriate number of ancestry principal components were also included, or a mixed linear model used to account for fine-scale population structure. Proxies ( $r^2 > 0.3$ ) were provided if SNPs were missing or poorly imputed ( $\text{info} < 0.5$ ) in a study (see **e-Table 3**).

#### Signal fine-mapping and bioinformatic analyses

For each of the top signals, we identified the set of SNPs that was 99% likely to contain the causal variant (the '99% credible set', assuming that the causal variant was included in the dataset) (**e-Appendix**).<sup>61</sup> This method calculates the posterior probabilities for each variant being causal, using approximate Bayes factors (ABFs), as proposed by Wakefield.<sup>61</sup> The credible set is constructed by adding the variants with the highest probabilities to the set until the sum of the probabilities exceeds 0.99. We set the value of  $W$  (the variance of the prior distribution of effect sizes) in the approximate Bayes factor formula to 0.04.<sup>58,61</sup>

We annotated relevant variants using wANNOVAR<sup>62</sup> (<http://wannovar.wglab.org/>), SIFT,<sup>63</sup> FATHMM [implemented using <https://www.ensembl.org/vep> and <http://fathmm.biocompute.org.uk/>],<sup>64</sup> and PolyPhen-2 [implemented using the HumDiv model via <http://genetics.bwh.harvard.edu/pph2/>]<sup>65</sup>, and CADD.<sup>58,66</sup>

We queried the 99% credible sets against expression quantitative trait locus (eQTL) resources in lung ( $n=1,038$ ),<sup>30,67-69</sup> and the GTEx online portal (v8) [lung  $N=515$ , whole blood  $N=670$ ],<sup>70</sup> to determine whether the locus was significantly associated with gene expression, i.e. whether it was an eQTL.

Functional information about nearby genes, or those implicated through eQTL analysis, was retrieved from the National Institute of Health Genetics Home Reference.

For one signal not previously associated with asthma, lung function or COPD, we performed formal testing for Bayesian colocalisation with cis-eQTL signals (gene genomic position  $\pm 0.5$  Mb) using the R package COLOC.<sup>71</sup> Briefly, this tests whether the GWAS signal and eQTL signal for this region are consistent with shared causal variant(s).<sup>72</sup> A large posterior probability is supporting evidence of a single shared causal variant.

We entered each sentinel SNP into the Hi-C Unifying Genomic Interrogator (HUGIn, <http://yunliweb.its.unc.edu/HUGIn>) and looked for long-range chromatin interactions with other genomic regions (in adult lung and a fetal lung fibroblast cell line) where the false discovery rate (FDR) was  $< 5\%$ .<sup>73-75</sup>

To assess the associations of SNPs in the credible sets with other traits, we undertook a phenome-wide scan using PhenoScanner (<http://www.phenoscanter.medschl.cam.ac.uk/>).<sup>76</sup> We used an FDR threshold (calculated by the Benjamini-Hochberg method)  $< 1\%$ . Evidence of association with rare diseases was sought in OMIM and Orphanet for the nearest gene to any SNP in the credible set, and genes implicated by eQTL evidence.

## Supplementary Results

### Signal selection

There were 80 sentinel variants associated with ACO at  $P < 5 \times 10^{-6}$ , of which 28 reached genome-wide significance ( $P < 5 \times 10^{-8}$ ). Of the 80 sentinels, four were located in the major histocompatibility complex (MHC) region (chr6:28,477,797-33,448,354), with a further three located just outside this region (chr6:26,000,000-34,000,000).

Conditional analysis of the 73 non-HLA sentinel variants identified five additional independent signals within 1Mb of these sentinels, plus two conditional signals (only associated at  $P < 5 \times 10^{-6}$  after conditioning on the sentinel variant), giving a total of 80 conditionally independent non-HLA signals. Separate conditional analysis of the extended HLA region identified three HLA signals.

### Sensitivity analysis

9638 cases were included in this analysis, and 26/31 signals had a direction of effect that was concordant with the Stage 1 analysis. The strongest signal was rs9273410, OR 1.103, 95% CI 1.055, 1.153,  $P = 1.55 \times 10^{-5}$ ,  $I^2 = 0\%$ , **e-Table 7**). Of the 26/31 signals directionally concordant with Stage 1, 24/31 were also directionally concordant with the main Stage 2 meta-analysis. Three of the 8 signals which met the criteria for follow-up in the main analysis also met the criteria for follow-up in this analysis, and no other signals of the remaining 23/31 met these criteria ( $p < 5 \times 10^{-8}$  in the joint analysis of stage 1 and stage 2, and either a lower p-value in the joint analysis than in UK Biobank alone, or  $p < 0.05$  in stage 2 alone).

## Study acknowledgements and funding

**Cardiovascular Health Study:** This CHS research was supported by NHLBI contracts HHSN268201200036C, HHSN268200800007C, HHSN268201800001C, N01HC55222, N01HC85079, N01HC85080, N01HC85081, N01HC85082, N01HC85083, N01HC85086; and NHLBI grants U01HL080295, R01HL087652, R01HL105756, R01HL103612, R01HL120393, and U01HL130114 with additional contribution from the National Institute of Neurological Disorders and Stroke (NINDS). Additional support was provided through R01AG023629 from the National Institute on Aging (NIA). A full list of principal CHS investigators and institutions can be found at [CHS-NHLBI.org](http://CHS-NHLBI.org). The provision of genotyping data was supported in part by the National Center for Advancing Translational Sciences, CTSI grant UL1TR001881, and the National Institute of Diabetes and Digestive and Kidney Disease Diabetes Research Center (DRC) grant DK063491 to the Southern California Diabetes Endocrinology Research Center. The content is solely the responsibility of the authors and does not necessarily represent the official views of the National Institutes of Health.

**COPDGene: Grant Support and Disclaimer:** The project described was supported by Award Number U01 HL089897 and Award Number U01 HL089856 from the National Heart, Lung, and Blood Institute. The content is solely the responsibility of the authors and does not necessarily represent the official views of the National Heart, Lung, and Blood Institute or the National Institutes of Health.

**COPD Foundation Funding:** The COPDGene® project is also supported by the COPD Foundation through contributions made to an Industry Advisory Board comprised of AstraZeneca, Boehringer Ingelheim, GlaxoSmithKline, Novartis, Pfizer, Siemens and Sunovion. **COPDGene® Investigators – Core Units. Administrative Center:** James D. Crapo, MD (PI); Edwin K. Silverman, MD, PhD (PI); Barry J. Make, MD; Elizabeth A. Regan, MD, PhD. **Genetic Analysis Center:** Terri Beaty, PhD; Ferdouse Begum, PhD; Peter J. Castaldi, MD, MSc; Michael Cho, MD; Dawn L. DeMeo, MD, MPH; Adel R. Boueiz, MD; Marilyn G. Foreman, MD, MS; Eitan Halper-Stromberg; Lystra P. Hayden, MD, MMSc; Craig P. Hersh, MD, MPH; Jacqueline Hetmanski, MS, MPH; Brian D. Hobbs, MD; John E. Hokanson, MPH, PhD; Nan Laird, PhD; Christoph Lange, PhD; Sharon M. Lutz, PhD; Merry-Lynn McDonald, PhD; Margaret M. Parker, PhD; Dmitry Prokopenko, Ph.D; Dandi Qiao, PhD; Elizabeth A. Regan, MD, PhD; Phuwant Sakornsakolpat, MD; Edwin K. Silverman, MD, PhD; Emily S. Wan, MD; Sungho Won, PhD. **Imaging Center:** Juan Pablo Centeno; Jean-Paul Charbonnier, PhD; Harvey O. Coxson, PhD; Craig J. Galban, PhD; MeiLan K. Han, MD, MS; Eric A. Hoffman, Stephen Humphries, PhD; Francine L. Jacobson, MD, MPH; Philip F. Judy, PhD; Ella A. Kazerooni, MD; Alex Kluiber; David A. Lynch, MB; Pietro Nardelli, PhD; John D. Newell, Jr., MD; Aleena Notary; Andrea Oh, MD; Elizabeth A. Regan, MD, PhD; James C. Ross, PhD; Raul San Jose Estepar, PhD; Joyce Schroeder, MD; Jered Sieren; Berend C. Stoel, PhD; Juerg Tschirren, PhD; Edwin Van Beek, MD, PhD; Bram van Ginneken, PhD; Eva van Rikxoort, PhD; Gonzalo Vegas Sanchez-Ferrero, PhD; Lucas Veitel; George R. Washko, MD; Carla G. Wilson, MS; **PFT QA Center, Salt Lake City, UT:** Robert Jensen, PhD. **Data Coordinating Center and Biostatistics, National Jewish Health, Denver, CO:** Douglas Everett, PhD; Jim Crooks, PhD; Katherine Pratte, PhD; Matt Strand, PhD; Carla G. Wilson, MS. **Epidemiology Core, University of Colorado Anschutz Medical Campus, Aurora, CO:** John E. Hokanson, MPH, PhD; Gregory Kinney, MPH, PhD; Sharon M. Lutz, PhD; Kendra A. Young, PhD. **Mortality Adjudication Core:** Surya P. Bhatt, MD; Jessica Bon, MD; Alejandro A. Diaz, MD, MPH; MeiLan K. Han, MD, MS; Barry Make, MD; Susan Murray, ScD; Elizabeth Regan, MD; Xavier Soler, MD; Carla G. Wilson, MS. **Biomarker Core:** Russell P. Bowler, MD, PhD; Katerina Kechris, PhD; Farnoush Banaei-Kashani, Ph.D. **COPDGene® Investigators – Clinical Centers. Ann Arbor VA:** Jeffrey L. Curtis, MD; Perry G. Pernicano, MD. **Baylor College of Medicine, Houston, TX:** Nicola Hanania, MD, MS; Mustafa Atik, MD; Aladin Boriek, PhD; Kalpatha Guntupalli, MD; Elizabeth Guy, MD; Amit Parulekar, MD. **Brigham and Women’s Hospital, Boston, MA:** Dawn L. DeMeo, MD, MPH; Alejandro A. Diaz, MD, MPH; Lystra P. Hayden, MD; Brian D. Hobbs, MD; Craig

Hersh, MD, MPH; Francine L. Jacobson, MD, MPH; George Washko, MD. *Columbia University, New York, NY*; R. Graham Barr, MD, DrPH; John Austin, MD; Belinda D'Souza, MD; Byron Thomashow, MD. *Duke University Medical Center, Durham, NC*; Neil MacIntyre, Jr., MD; H. Page McAdams, MD; Lacey Washington, MD. *Grady Memorial Hospital, Atlanta, GA*; Eric Flenaugh, MD; Silanth Terpenning, MD. *HealthPartners Research Institute, Minneapolis, MN*; Charlene McEvoy, MD, MPH; Joseph Tashjian, MD. *Johns Hopkins University, Baltimore, MD*; Robert Wise, MD; Robert Brown, MD; Nadia N. Hansel, MD, MPH; Karen Horton, MD; Allison Lambert, MD, MHS; Nirupama Putcha, MD, MHS. *Lundquist Institute for Biomedical Innovation at Harbor UCLA Medical Center, Torrance, CA*; Richard Casaburi, PhD, MD; Alessandra Adami, PhD; Matthew Budoff, MD; Hans Fischer, MD; Janos Porszasz, MD, PhD; Harry Rossiter, PhD; William Stringer, MD. *Michael E. DeBakey VAMC, Houston, TX*; Amir Sharafkhaneh, MD, PhD; Charlie Lan, DO. *Minneapolis VA*; Christine Wendt, MD; Brian Bell, MD; Ken M. Kunisaki, MD, MS. *National Jewish Health, Denver, CO*; Russell Bowler, MD, PhD; David A. Lynch, MB. *Reliant Medical Group, Worcester, MA*; Richard Rosiello, MD; David Pace, MD. *Temple University, Philadelphia, PA*; Gerard Criner, MD; David Ciccolella, MD; Francis Cordova, MD; Chandra Dass, MD; Gilbert D'Alonzo, DO; Parag Desai, MD; Michael Jacobs, PharmD; Steven Kelsen, MD, PhD; Victor Kim, MD; A. James Mamary, MD; Nathaniel Marchetti, DO; Aditi Satti, MD; Kartik Shenoy, MD; Robert M. Steiner, MD; Alex Swift, MD; Irene Swift, MD; Maria Elena Vega-Sanchez, MD. *University of Alabama, Birmingham, AL*; Mark Dransfield, MD; William Bailey, MD; Surya P. Bhatt, MD; Anand Iyer, MD; Hrudaya Nath, MD; J. Michael Wells, MD. *University of California, San Diego, CA*; Douglas Conrad, MD; Xavier Soler, MD, PhD; Andrew Yen, MD. *University of Iowa, Iowa City, IA*; Alejandro P. Comellas, MD; Karin F. Hoth, PhD; John Newell, Jr., MD; Brad Thompson, MD. *University of Michigan, Ann Arbor, MI*; MeiLan K. Han, MD MS; Ella Kazerooni, MD MS; Wassim Labaki, MD MS; Craig Galban, PhD; Dharshan Vummidi, MD. *University of Minnesota, Minneapolis, MN*; Joanne Billings, MD; Abbie Begnaud, MD; Tadashi Allen, MD. *University of Pittsburgh, Pittsburgh, PA*; Frank Sciorba, MD; Jessica Bon, MD; Divay Chandra, MD, MSc; Carl Fuhrman, MD; Joel Weissfeld, MD, MPH. *University of Texas Health, San Antonio, San Antonio, TX*; Antonio Anzueto, MD; Sandra Adams, MD; Diego Maselli-Caceres, MD; Mario E. Ruiz, MD; Harjinder Singh.

**ECLIPSE:** The ECLIPSE study (NCT00292552; GSK code SCO104960) was funded by GSK.

**EPIC-Norfolk:** The EPIC-Norfolk study team are grateful to all the participants who have been part of the project and to the many members of the study teams at the University of Cambridge who have enabled this research. The study is funded by Medical Research Council (MR/N003284/1, MC-UU\_12015/1, MC\_PC\_13048) Cancer Research UK (C864/A14136).

**FHS:** This work was partially supported by the National Heart, Lung and Blood Institute's **Framingham Heart Study** (contract number N01-HC-25195) and its contract with Affymetrix, Inc for genotyping services (contract number N02-HL-6-4278). Also supported by NIH P01 AI050516.

**GASP** (moderate-severe asthma correlations): cohort collection and genotyping was funded by; Asthma UK Grant to I.S. (AUK-PG-2013-188), Rosetrees Trust (Grant to I.S.), AirPROM, U-BIOPRED (EU-IMI 115010) and an MRC Strategic Award to I.P.H., M.D.T., L.V.W. and Professor David Strachan (MC\_PC\_12010). Recruitment of asthma patients in Manchester was funded by the NIHR and the North West Lung Centre Charity.

**Generation Scotland** received core support from the Chief Scientist Office of the Scottish Government Health Directorates [CZD/16/6] and the Scottish Funding Council [HR03006]. Genotyping was funded by the Medical Research Council UK and the Wellcome Trust (Wellcome Trust Strategic Award "STratifying Resilience and Depression Longitudinally" (STRADL) Reference 104036/Z/14/Z). .CH is supported by an MRC University Unit Programme Grant MC\_UU\_00007/10

(QTL in Health and Disease). We thank all the families who took part, the general practitioners and the Scottish School of Primary Care for their help in recruiting them, and the whole Generation Scotland team, which includes interviewers, computer and laboratory technicians, clerical workers, research scientists, volunteers, managers, receptionists, healthcare assistants and nurses. Genotyping of the GS:SFHS samples was carried out by the Genetics Core Laboratory at the Edinburgh Clinical Research Facility, University of Edinburgh, Scotland.

**GenKOLS:** The Norway GenKOLS study (Genetics of Chronic Obstructive Lung Disease, GSK code RES11080) was funded by GSK.

**HUNT:** The Trøndelag Health Study (The HUNT Study) is a collaboration between HUNT Research Center (Faculty of Medicine and Health Sciences, NTNU, Norwegian University of Science and Technology), Nord-Trøndelag County Council, Central Norway Regional Health Authority, and the Norwegian Institute of Public Health. The K.G. Jebsen Center for Genetic Epidemiology is funded by Stiftelsen Kristian Gerhard Jebsen; Faculty of Medicine and Health Sciences, NTNU; The Liaison Committee for education, research and innovation in Central Norway; and the Joint Research Committee between St. Olavs Hospital and the Faculty of Medicine and Health Sciences, NTNU. The genotyping in HUNT was financed by the National Institute of Health (NIH); University of Michigan; The Research Council of Norway; The Liaison Committee for education, research and innovation in Central Norway; and the Joint Research Committee between St. Olavs Hospital and the Faculty of Medicine and Health Sciences, NTNU.

**Lovelace Smokers Cohort:** The cohort and analysis was primarily supported by National Cancer Institute grant R01 CA097356 (SAB). The State of New Mexico as a direct appropriation from the Tobacco Settlement Fund to SAB through collaboration with University of New Mexico provided initial support to establish the LSC. Additional support was provided by NIH/NCI P30 CA118100 (SAB), HL68111 (Y.T.), and HL107873-01 (YT and SB).

**Rotterdam Study:** The study is funded by Erasmus Medical Center and Erasmus University, Rotterdam, Netherlands Organization for the Health Research and Development (ZonMw), the Research Institute for Diseases in the Elderly (RIDE), the Ministry of Education, Culture and Science, the Ministry for Health, Welfare and Sports, the European Commission (DG XII), and the Municipality of Rotterdam. The generation and management of GWAS genotype data for the Rotterdam Study (RS I, RS II, RS III) was executed by the Human Genotyping Facility of the Genetic Laboratory of the Department of Internal Medicine, Erasmus MC, Rotterdam, The Netherlands. The GWAS datasets are supported by the Netherlands Organisation of Scientific Research NWO Investments (nr. 175.010.2005.011, 911-03-012), the Genetic Laboratory of the Department of Internal Medicine, Erasmus MC, the Research Institute for Diseases in the Elderly (014-93-015; RIDE2), the Netherlands Genomics Initiative (NGI)/Netherlands Organisation for Scientific Research (NWO) Netherlands Consortium for Healthy Aging (NCHA), project nr. 050-060-810. The generation and management of spirometric data was supported by FWO project G035014N.

**SPIROMICS:** The Subpopulations and Intermediate Outcomes in COPD Study was supported by contracts from the NIH/NHLBI (HHSN268200900013C, HHSN268200900014C, HHSN268200900015C, HHSN268200900016C, HHSN268200900017C, HHSN268200900018C, HHSN268200900019C, HHSN268200900020C), which were supplemented by contributions made through the Foundation for the NIH from AstraZeneca; Bellerophon Therapeutics; Boehringer-Ingelheim Pharmaceuticals, Inc; Chiesi Farmaceutici SpA; Forest Research Institute, Inc; GSK; Grifols Therapeutics, Inc; Ikaria, Inc; Nycomed GmbH; Takeda Pharmaceutical Company; Novartis Pharmaceuticals Corporation;

Regeneron Pharmaceuticals, Inc; and Sanofi. We acknowledge all investigators, staff, and participants in SPIROMICS.

e-Figure 1: Quantile-quantile plot of ACO GWAS results from discovery analysis in UK Biobank

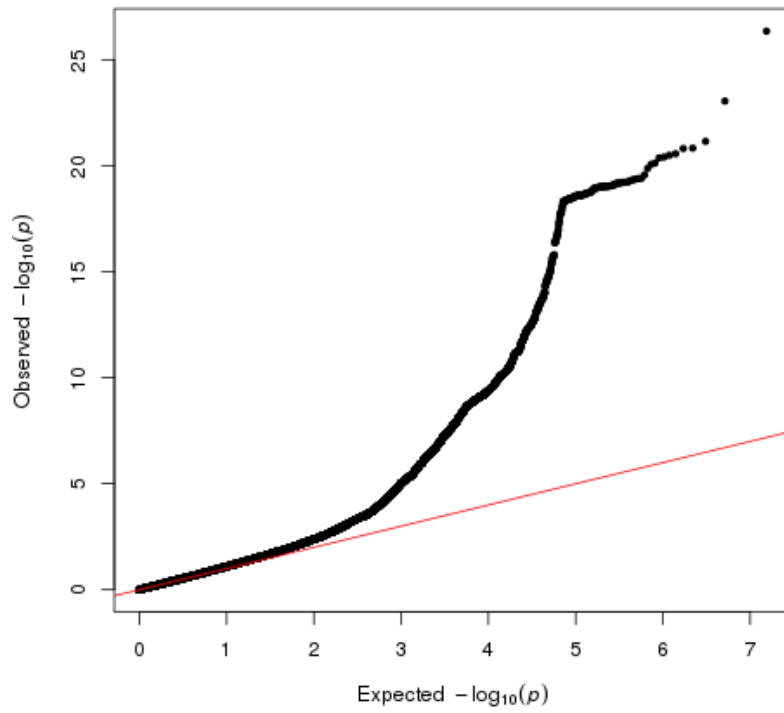

8068 ACO cases, 40360 controls, 7,693,381 SNPS. Intercept value from univariate LD score regression = 1.018. Standard errors and p-values in UK Biobank are corrected for this value.

e-Figure 2: Flowchart detailing the signal selection process in the UK Biobank discovery analysis

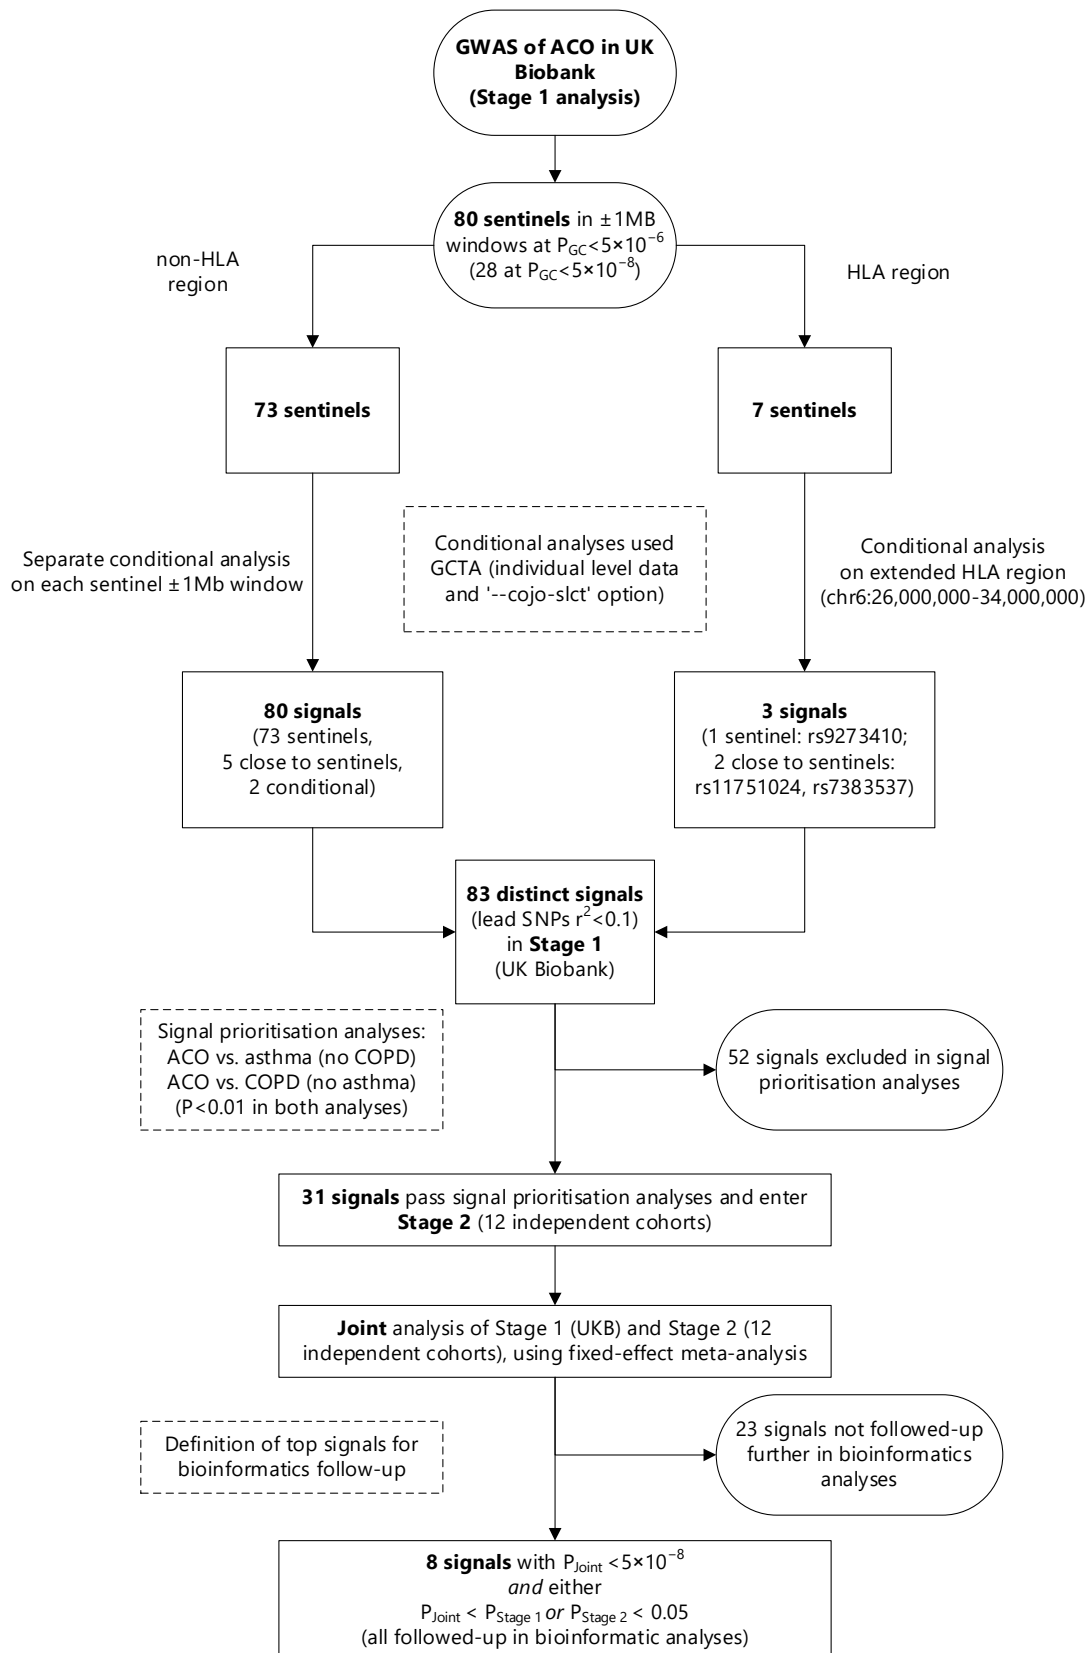



e-Figure 3 Scatterplots comparing effects in 31 signals taken forward for replication, with results when ACO cases are split into those with adult- (>25 years) and child-onset (<12 years) asthma

Comparison of effect sizes from analysis with ACO cases restricted to asthma onset >25 years (3755 cases) and analysis with ACO cases restricted to asthma onset <12 years (2903 cases).

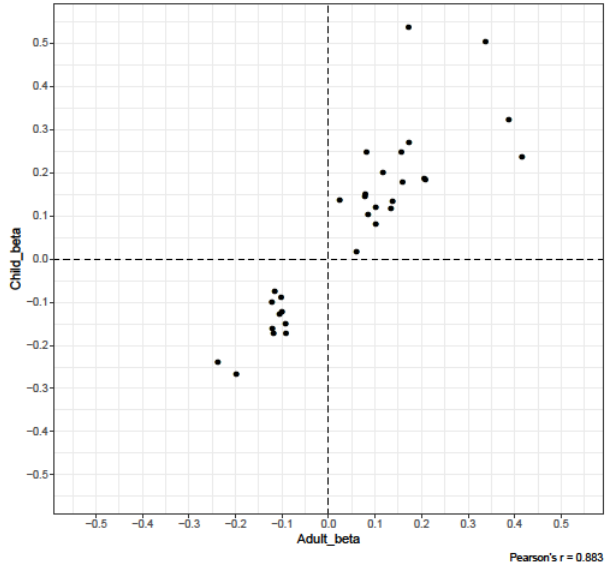

Comparison of effect sizes from main GWAS (8068 ACO, 40360 controls) and analysis with ACO cases restricted to asthma onset <12 years (2903 cases).

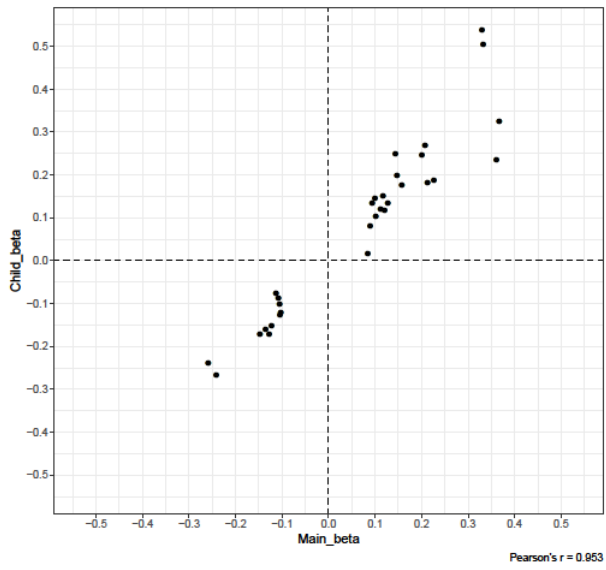

Comparison of effect sizes from main GWAS (8068 ACO, 40360 controls) and analysis with ACO cases restricted to asthma onset >25 years (3755 cases).

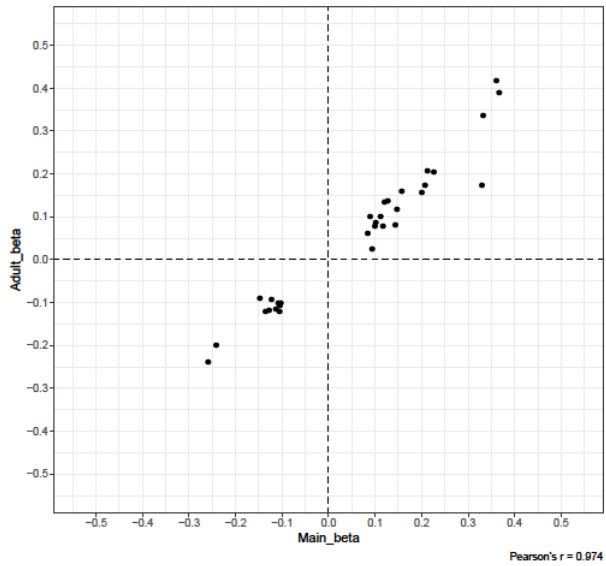

From left to right: comparison of effects (betas) of child-onset asthma ACO vs adult-onset asthma ACO cases; comparison of effects in child-onset ACO versus all ACO (e.g. main analysis); comparison of effects in adult-onset ACO versus all ACO (e.g. main analysis). Both subgroup analyses used the same 40,360 controls as used in the main analysis.

e-Figure 4 Scatterplots comparing effects in 31 signals taken forward for replication, with smoking-stratified results (by ever- and never-smokers)

Comparison of effect sizes from analysis of ever-smokers (4367 ACO, 17316 controls), with analysis of never-smokers (3701 ACO, 23044 controls).

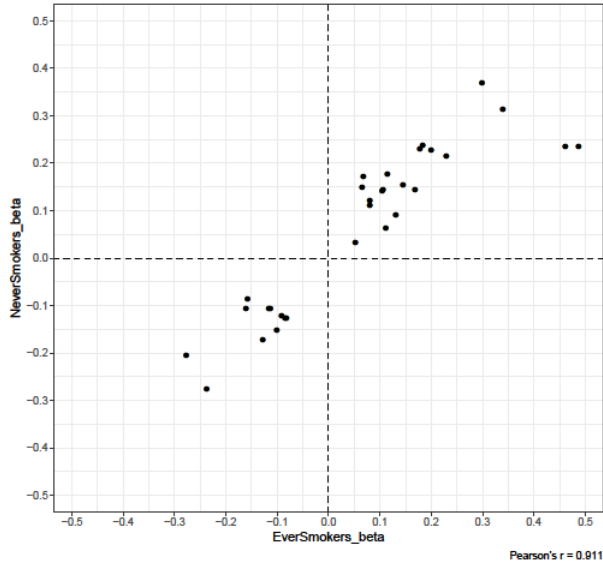

Comparison of effect sizes from main GWAS (8068 ACO, 40360 controls) and analysis of never-smokers (3701 ACO, 23044 controls).

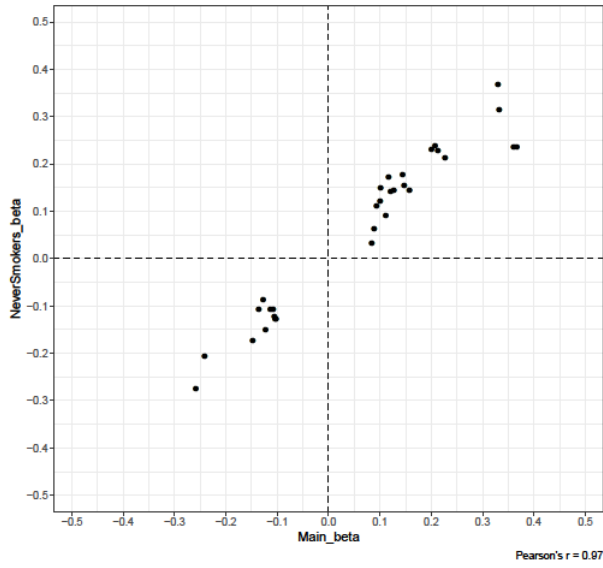

Comparison of effect sizes from main GWAS (8068 ACO, 40360 controls) and analysis of ever-smokers (4367 ACO, 17316 controls).

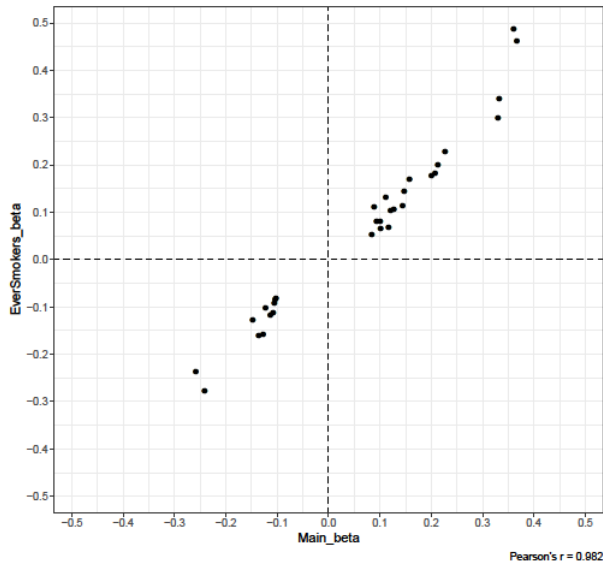

From left to right: comparison of effects (betas) of ACO versus controls (never-smokers) and ACO versus controls (ever-smokers); comparison of effects in ACO versus controls (never-smokers) versus all ACO (e.g. main analysis); comparison of effects in ACO versus controls (ever-smokers) versus all ACO (e.g. main analysis).

e-Figure 5 Region plots for eight signals taken forward for downstream analyses.

rs80101740

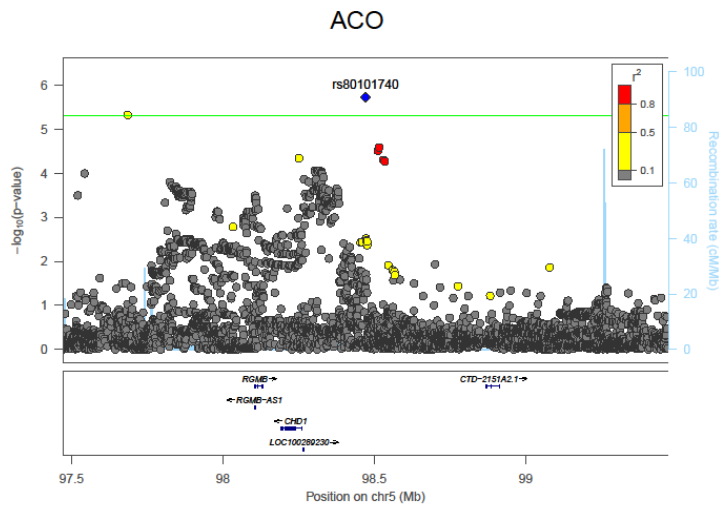

rs35570272

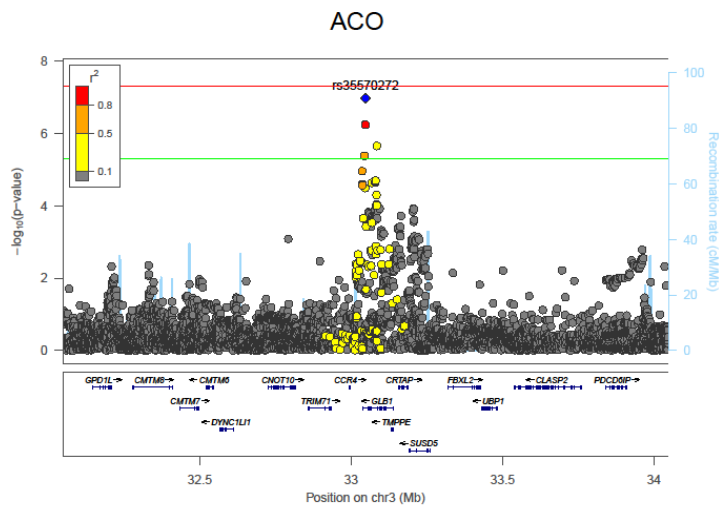

rs16903574

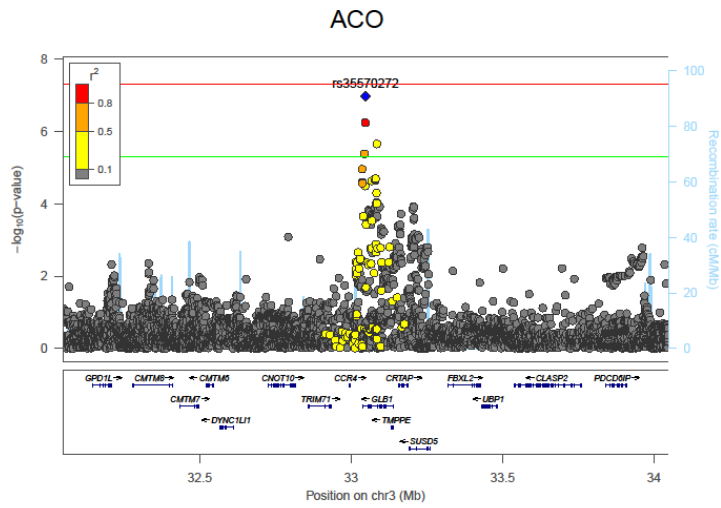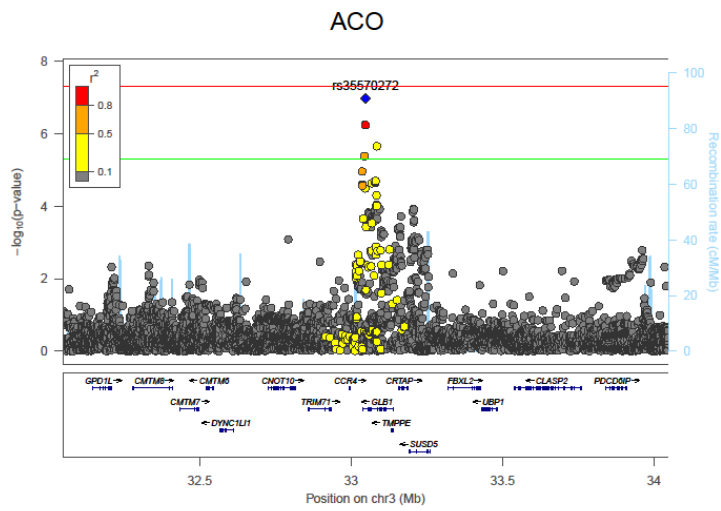

rs1837253

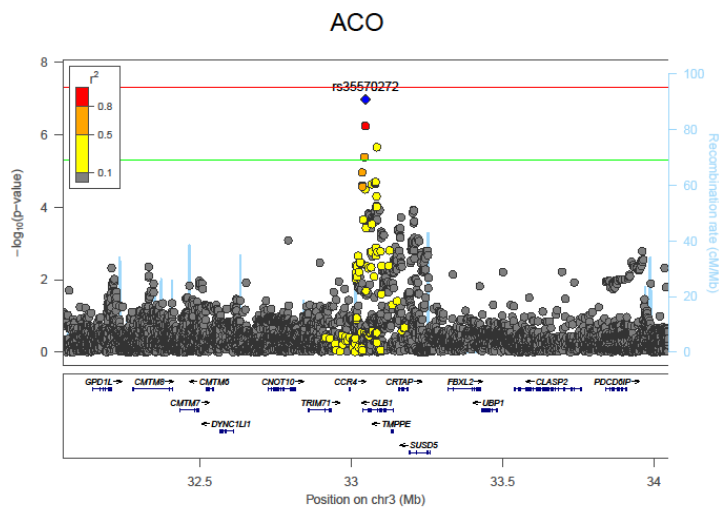



rs6787279

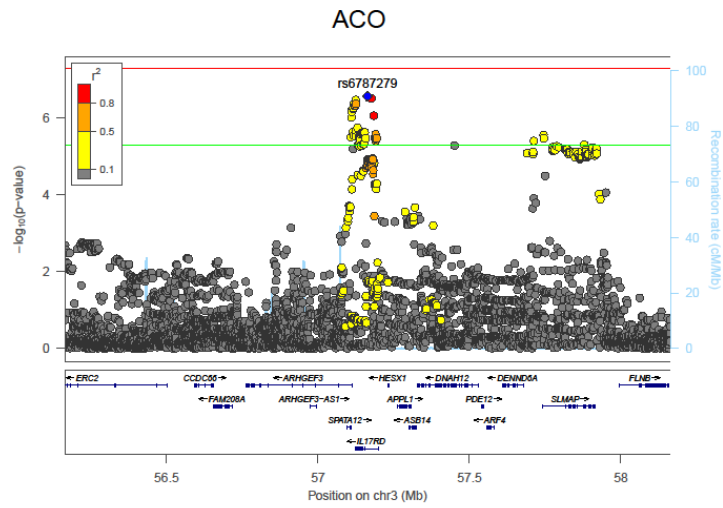

rs9273410

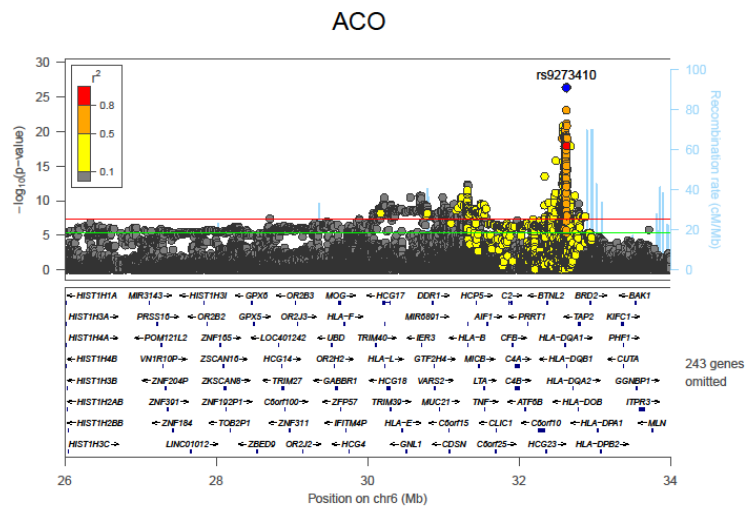

rs3749833

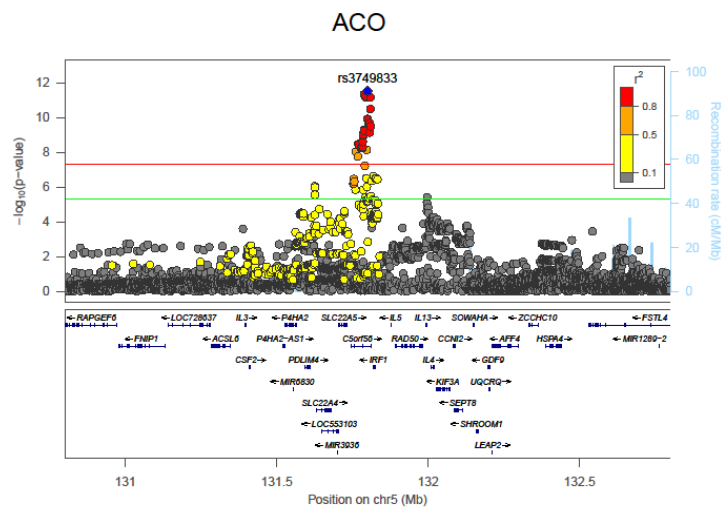

e-Figure 6 Forest plots for eight signals taken forward for downstream analyses (results from Stage 1 + Stage 2 joint analysis).

rs80101740

**Meta-analysis of Stage 1 (UKB) + Stage 2 (12 studies) for variant rs80101740, ( $I^2=0\%$ )**

| Cohort               | OR           | LCI          | UCI          | P               | Cases        | Controls     |
|----------------------|--------------|--------------|--------------|-----------------|--------------|--------------|
| UKB                  | 1.443        | 1.241        | 1.678        | 1.87e-06        | 8068         | 40360        |
| COPDGeneNhw          | 1.557        | 0.901        | 2.690        | 0.113           | 591          | 1935         |
| ECLIPSE              | 0.985        | 0.311        | 3.120        | 0.979           | 326          | 137          |
| GenKOLS              | 1.169        | 0.550        | 2.486        | 0.685           | 425          | 707          |
| SPIROMICS            | 1.348        | 0.517        | 3.517        | 0.541           | 197          | 433          |
| LOVELACE             |              |              |              |                 |              |              |
| FHS                  |              |              |              |                 |              |              |
| EPIC                 | 1.485        | 0.810        | 2.723        | 0.201           | 281          | 10921        |
| HUNT                 | 1.627        | 0.941        | 2.812        | 0.081           | 1070         | 6788         |
| CHS                  | 1.332        | 0.447        | 3.966        | 0.607           | 89           | 1432         |
| RS                   | 2.470        | 0.909        | 6.715        | 0.076           | 114          | 4183         |
| GS                   | 0.997        | 0.558        | 1.783        | 0.993           | 374          | 11939        |
| deCODE               | 1.213        | 0.629        | 2.338        | 0.564           | 631          | 5835         |
| <b>Meta-Analysis</b> | <b>1.420</b> | <b>1.253</b> | <b>1.609</b> | <b>3.72e-08</b> | <b>12166</b> | <b>84670</b> |

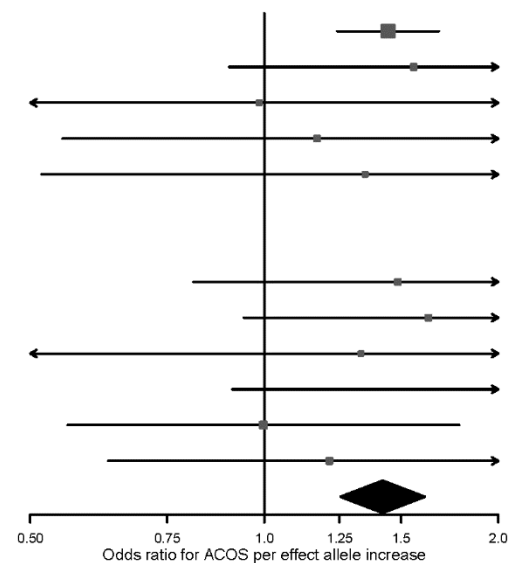

rs35570272

**Meta-analysis of Stage 1 (UKB) + Stage 2 (12 studies) for variant rs35570272, (I<sup>2</sup>=15.9%)**

| Cohort               | OR           | LCI          | UCI          | P               | Cases        | Controls     |
|----------------------|--------------|--------------|--------------|-----------------|--------------|--------------|
| UKB                  | 1.107        | 1.066        | 1.149        | 1.06e-07        | 8068         | 40360        |
| COPDGeneNhw          | 1.082        | 0.943        | 1.241        | 0.261           | 591          | 1935         |
| ECLIPSE              | 0.707        | 0.518        | 0.966        | 0.029           | 326          | 137          |
| GenKOLS              | 1.202        | 0.984        | 1.468        | 0.071           | 425          | 707          |
| SPIROMICS            | 0.927        | 0.728        | 1.180        | 0.536           | 197          | 433          |
| LOVELACE             | 1.267        | 0.856        | 1.877        | 0.237           | 64           | 582          |
| FHS                  | 0.984        | 0.752        | 1.288        | 0.905           | 139          | 3707         |
| EPIC                 | 1.104        | 0.932        | 1.309        | 0.253           | 281          | 10921        |
| HUNT                 | 1.133        | 1.020        | 1.259        | 0.020           | 1070         | 6788         |
| CHS                  | 1.233        | 0.903        | 1.683        | 0.188           | 89           | 1432         |
| RS                   | 1.166        | 0.880        | 1.547        | 0.285           | 114          | 4183         |
| GS                   | 1.074        | 0.923        | 1.250        | 0.355           | 374          | 11939        |
| deCODE               | 1.013        | 0.887        | 1.156        | 0.849           | 631          | 5835         |
| <b>Meta-Analysis</b> | <b>1.097</b> | <b>1.064</b> | <b>1.130</b> | <b>2.44e-09</b> | <b>12369</b> | <b>88959</b> |

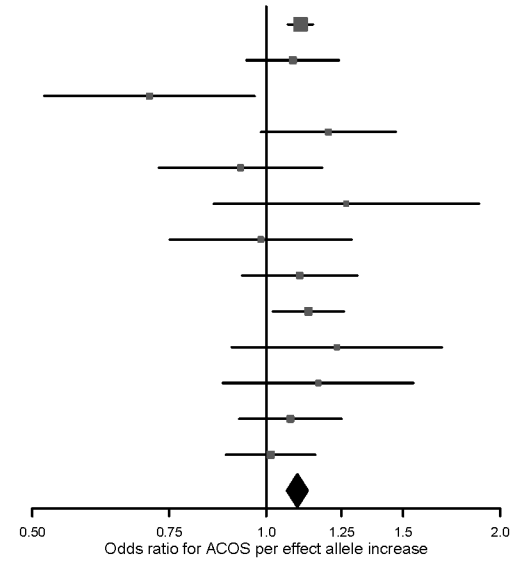

rs16903574

**Meta-analysis of Stage 1 (UKB) + Stage 2 (12 studies) for variant rs16903574, (I<sup>2</sup>=0%)**

| Cohort               | OR           | LCI          | UCI          | P              | Cases        | Controls     |
|----------------------|--------------|--------------|--------------|----------------|--------------|--------------|
| UKB                  | 1.231        | 1.148        | 1.319        | 4.47e-09       | 8068         | 40360        |
| COPDGeneNhw          | 1.124        | 0.877        | 1.442        | 0.356          | 591          | 1930         |
| ECLIPSE              | 1.569        | 0.837        | 2.942        | 0.160          | 326          | 137          |
| GenKOLS              | 1.585        | 1.096        | 2.292        | 0.014          | 425          | 707          |
| SPIROMICS            | 1.318        | 0.819        | 2.122        | 0.256          | 197          | 433          |
| LOVELACE             | 1.039        | 0.520        | 2.077        | 0.913          | 64           | 589          |
| FHS                  | 0.989        | 0.644        | 1.520        | 0.960          | 139          | 3707         |
| EPIC                 | 1.235        | 0.919        | 1.659        | 0.162          | 281          | 10921        |
| HUNT                 | 1.020        | 0.835        | 1.246        | 0.847          | 1070         | 6788         |
| CHS                  | 1.130        | 0.586        | 2.180        | 0.716          | 89           | 1432         |
| RS                   | 1.520        | 0.871        | 2.652        | 0.141          | 114          | 4183         |
| GS                   | 0.967        | 0.722        | 1.296        | 0.824          | 374          | 11939        |
| deCODE               | 1.117        | 0.879        | 1.419        | 0.372          | 631          | 5835         |
| <b>Meta-Analysis</b> | <b>1.197</b> | <b>1.131</b> | <b>1.266</b> | <b>3.8e-10</b> | <b>12369</b> | <b>88961</b> |

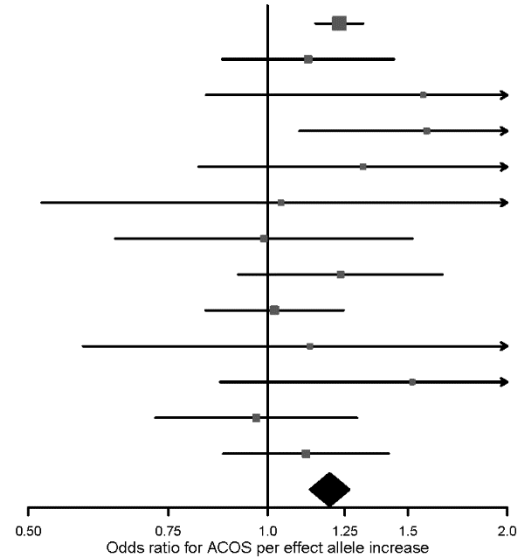

rs2584662

**Meta-analysis of Stage 1 (UKB) + Stage 2 (12 studies) for variant rs2584662, (I<sup>2</sup>=39.6%)**

| Cohort               | OR           | LCI          | UCI          | P               | Cases        | Controls     |
|----------------------|--------------|--------------|--------------|-----------------|--------------|--------------|
| UKB                  | 0.901        | 0.868        | 0.935        | 3.2e-08         | 8068         | 40360        |
| COPDGeneNhw          | 0.834        | 0.726        | 0.957        | 0.010           | 591          | 1935         |
| ECLIPSE              | 1.294        | 0.953        | 1.757        | 0.098           | 326          | 137          |
| GenKOLS              | 0.892        | 0.732        | 1.086        | 0.254           | 425          | 707          |
| SPIROMICS            | 0.918        | 0.710        | 1.186        | 0.512           | 197          | 433          |
| LOVELACE             | 1.035        | 0.690        | 1.552        | 0.868           | 64           | 589          |
| FHS                  | 0.858        | 0.645        | 1.143        | 0.296           | 139          | 3707         |
| EPIC                 | 0.835        | 0.700        | 0.996        | 0.045           | 281          | 10921        |
| HUNT                 | 0.926        | 0.836        | 1.026        | 0.143           | 1070         | 6788         |
| CHS                  | 1.080        | 0.790        | 1.476        | 0.631           | 89           | 1432         |
| RS                   | 1.155        | 0.876        | 1.522        | 0.306           | 114          | 4183         |
| GS                   | 1.069        | 0.920        | 1.242        | 0.383           | 374          | 11939        |
| deCODE               | 1.025        | 0.899        | 1.169        | 0.706           | 631          | 5835         |
| <b>Meta-Analysis</b> | <b>0.918</b> | <b>0.890</b> | <b>0.946</b> | <b>2.21e-08</b> | <b>12369</b> | <b>88966</b> |

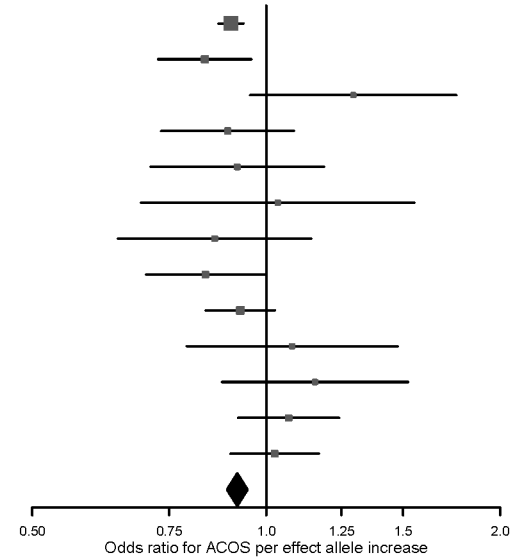

rs1837253

**Meta-analysis of Stage 1 (UKB) + Stage 2 (12 studies) for variant rs1837253, (I<sup>2</sup>=53.3%)**

| Cohort               | OR           | LCI          | UCI          | P               | Cases        | Controls     |
|----------------------|--------------|--------------|--------------|-----------------|--------------|--------------|
| UKB                  | 1.222        | 1.172        | 1.274        | 4.22e-21        | 8068         | 40360        |
| COPDGeneNhw          | 1.046        | 0.898        | 1.218        | 0.564           | 591          | 1934         |
| ECLIPSE              | 1.255        | 0.885        | 1.780        | 0.203           | 326          | 137          |
| GenKOLS              | 1.057        | 0.856        | 1.306        | 0.607           | 425          | 707          |
| SPIROMICS            | 0.880        | 0.651        | 1.189        | 0.406           | 197          | 433          |
| LOVELACE             | 1.301        | 0.830        | 2.038        | 0.251           | 63           | 590          |
| FHS                  | 1.051        | 0.805        | 1.372        | 0.713           | 139          | 3707         |
| EPIC                 | 0.974        | 0.804        | 1.178        | 0.783           | 281          | 10921        |
| HUNT                 | 1.092        | 0.976        | 1.221        | 0.125           | 1070         | 6788         |
| CHS                  | 1.120        | 0.788        | 1.591        | 0.527           | 89           | 1432         |
| RS                   | 1.102        | 0.813        | 1.492        | 0.532           | 114          | 4183         |
| GS                   | 0.904        | 0.765        | 1.070        | 0.240           | 374          | 11939        |
| deCODE               | 1.185        | 1.023        | 1.373        | 0.021           | 631          | 5835         |
| <b>Meta-Analysis</b> | <b>1.162</b> | <b>1.124</b> | <b>1.202</b> | <b>1.53e-18</b> | <b>12368</b> | <b>88966</b> |

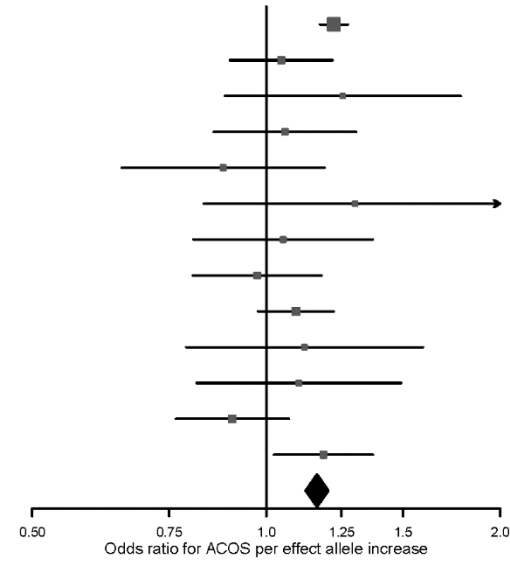

rs6787279

**Meta-analysis of Stage 1 (UKB) + Stage 2 (12 studies) for variant rs6787279, (I<sup>2</sup>=10.8%)**

| Cohort               | OR           | LCI          | UCI          | P               | Cases        | Controls     |
|----------------------|--------------|--------------|--------------|-----------------|--------------|--------------|
| UKB                  | 0.880        | 0.838        | 0.924        | 2.69e-07        | 8068         | 40360        |
| COPDGeneNhw          | 0.854        | 0.710        | 1.027        | 0.094           | 591          | 1934         |
| ECLIPSE              | 0.789        | 0.527        | 1.181        | 0.250           | 326          | 137          |
| GenKOLS              | 0.933        | 0.725        | 1.201        | 0.588           | 425          | 707          |
| SPIROMICS            | 0.780        | 0.562        | 1.084        | 0.139           | 197          | 433          |
| LOVELACE             | 0.808        | 0.485        | 1.345        | 0.412           | 64           | 591          |
| FHS                  | 0.716        | 0.512        | 1.001        | 0.051           | 139          | 3707         |
| EPIC                 | 0.940        | 0.747        | 1.184        | 0.601           | 281          | 10921        |
| HUNT                 | 0.944        | 0.819        | 1.089        | 0.431           | 1070         | 6788         |
| CHS                  | 1.541        | 1.063        | 2.234        | 0.022           | 89           | 1432         |
| RS                   | 0.993        | 0.696        | 1.418        | 0.971           | 114          | 4183         |
| GS                   | 0.946        | 0.775        | 1.155        | 0.585           | 374          | 11939        |
| deCODE               | 0.853        | 0.708        | 1.027        | 0.099           | 631          | 5835         |
| <b>Meta-Analysis</b> | <b>0.889</b> | <b>0.855</b> | <b>0.926</b> | <b>7.87e-09</b> | <b>12369</b> | <b>88967</b> |

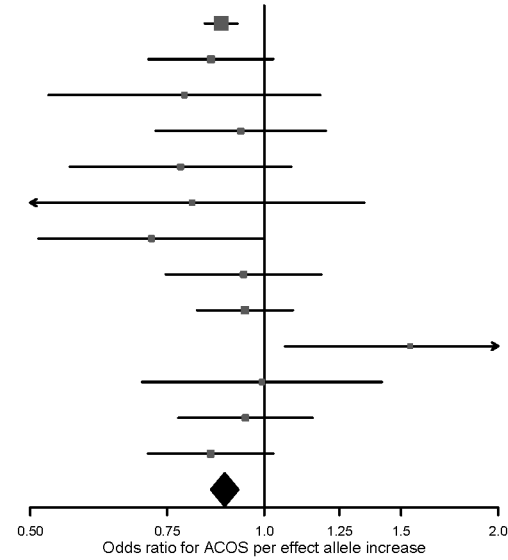

rs9273410

**Meta-analysis of Stage 1 (UKB) + Stage 2 (12 studies) for variant rs9273410, (I<sup>2</sup>=28.5%)**

| Cohort               | OR           | LCI          | UCI          | P               | Cases        | Controls     |
|----------------------|--------------|--------------|--------------|-----------------|--------------|--------------|
| UKB                  | 1.237        | 1.190        | 1.286        | 4.37e-27        | 8068         | 40360        |
| COPDGeneNhw          | 0.973        | 0.812        | 1.167        | 0.772           | 591          | 1935         |
| ECLIPSE              | 0.952        | 0.699        | 1.296        | 0.756           | 326          | 137          |
| GenKOLS              | 1.152        | 0.873        | 1.519        | 0.318           | 425          | 707          |
| SPIROMICS            | 1.228        | 0.960        | 1.569        | 0.102           | 197          | 433          |
| LOVELACE             | 0.994        | 0.671        | 1.471        | 0.976           | 64           | 588          |
| FHS                  | 1.152        | 0.841        | 1.579        | 0.377           | 139          | 3707         |
| EPIC                 | 1.060        | 0.883        | 1.272        | 0.534           | 281          | 10921        |
| HUNT                 | 1.168        | 1.008        | 1.354        | 0.039           | 1070         | 6788         |
| CHS                  | 0.982        | 0.633        | 1.524        | 0.935           | 89           | 1432         |
| RS                   | 1.256        | 0.955        | 1.651        | 0.103           | 114          | 4183         |
| GS                   | 1.015        | 0.847        | 1.217        | 0.871           | 374          | 11939        |
| deCODE               | 1.202        | 1.057        | 1.367        | 0.005           | 631          | 5835         |
| <b>Meta-Analysis</b> | <b>1.199</b> | <b>1.161</b> | <b>1.239</b> | <b>9.19e-28</b> | <b>12369</b> | <b>88965</b> |

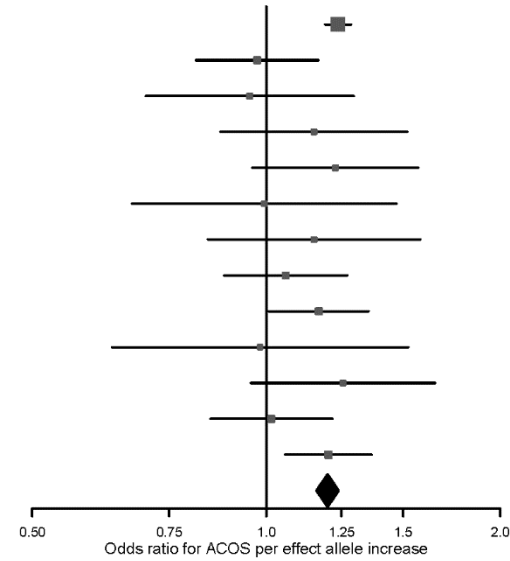



rs3749833

**Meta-analysis of Stage 1 (UKB) + Stage 2 (12 studies) for variant rs3749833, (I<sup>2</sup>=13.7%)**

| Cohort               | OR           | LCI          | UCI          | P               | Cases        | Controls     |
|----------------------|--------------|--------------|--------------|-----------------|--------------|--------------|
| UKB                  | 1.158        | 1.111        | 1.207        | 3.1e-12         | 8068         | 40360        |
| COPDGeneNhw          | 1.064        | 0.913        | 1.242        | 0.426           | 591          | 1935         |
| ECLIPSE              | 1.062        | 0.751        | 1.503        | 0.734           | 326          | 137          |
| GenKOLS              | 1.050        | 0.848        | 1.300        | 0.652           | 425          | 707          |
| SPIROMICS            | 0.953        | 0.718        | 1.265        | 0.737           | 197          | 433          |
| LOVELACE             | 1.303        | 0.863        | 1.967        | 0.208           | 64           | 592          |
| FHS                  | 1.045        | 0.787        | 1.388        | 0.762           | 139          | 3707         |
| EPIC                 | 1.114        | 0.923        | 1.344        | 0.260           | 281          | 10921        |
| HUNT                 | 1.126        | 1.007        | 1.259        | 0.037           | 1070         | 6788         |
| CHS                  | 1.013        | 0.713        | 1.440        | 0.943           | 89           | 1432         |
| RS                   | 0.884        | 0.646        | 1.210        | 0.440           | 114          | 4183         |
| GS                   | 0.912        | 0.773        | 1.077        | 0.278           | 374          | 11939        |
| deCODE               | 1.092        | 0.952        | 1.253        | 0.206           | 631          | 5835         |
| <b>Meta-Analysis</b> | <b>1.123</b> | <b>1.086</b> | <b>1.160</b> | <b>9.37e-12</b> | <b>12369</b> | <b>88969</b> |

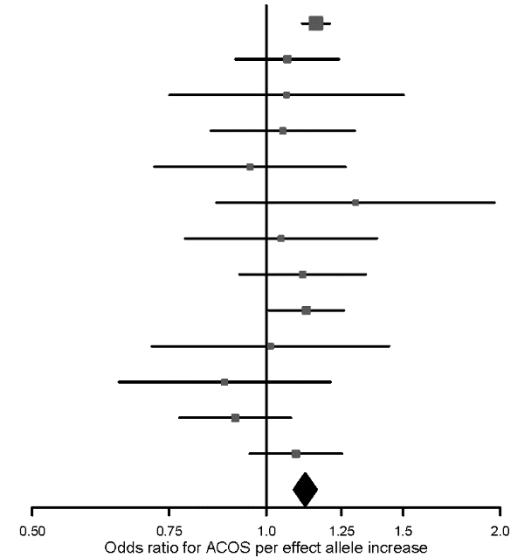

## References

1. Moffatt MF, Kabesch M, Liang L, et al. Genetic variants regulating ORMDL3 expression contribute to the risk of childhood asthma. *Nature*. 2007;448(7152):470-473.
2. Himes BE, Hunninghake GM, Baurley JW, et al. Genome-wide association analysis identifies PDE4D as an asthma-susceptibility gene. *Am. J. Hum. Genet.* 2009;84(5):581-593.
3. Gudbjartsson DF, Bjornsdottir US, Halapi E, et al. Sequence variants affecting eosinophil numbers associate with asthma and myocardial infarction. *Nat. Genet.* 2009;41(3):342-347.
4. Moffatt MF, Gut IG, Demenais F, et al. A Large-Scale, Consortium-Based Genomewide Association Study of Asthma. *N. Engl. J. Med.* 2010;363(13):1211-1221.
5. Sleiman PM, Flory J, Imielinski M, et al. Variants of DENND1B associated with asthma in children. *N. Engl. J. Med.* 2010;362(1):36-44.
6. Ferreira MAR, Matheson MC, Duffy DL, et al. Identification of IL6R and chromosome 11q13.5 as risk loci for asthma. *The Lancet*. 2011;378(9795):1006-1014.
7. Hirota T, Takahashi A, Kubo M, et al. Genome-wide association study identifies three new susceptibility loci for adult asthma in the Japanese population. *Nat. Genet.* 2011;43(9):893-896.
8. Noguchi E, Sakamoto H, Hirota T, et al. Genome-wide association study identifies HLA-DP as a susceptibility gene for pediatric asthma in Asian populations. *PLoS Genet.* 2011;7(7):e1002170.
9. Torgerson DG, Ampleford EJ, Chiu GY, et al. Meta-analysis of genome-wide association studies of asthma in ethnically diverse North American populations. *Nat. Genet.* 2011;43(9):887-892.
10. Ramasamy A, Kuokkanen M, Vedantam S, et al. Genome-wide association studies of asthma in population-based cohorts confirm known and suggested loci and identify an additional association near HLA. *PLoS One*. 2012;7(9):e44008.
11. Wan YI, Shrine NRG, Soler Artigas M, et al. Genome-wide association study to identify genetic determinants of severe asthma. *Thorax*. 2012;67:762-768.
12. Bonnelykke K, Sleiman P, Nielsen K, et al. A genome-wide association study identifies CDHR3 as a susceptibility locus for early childhood asthma with severe exacerbations. *Nat. Genet.* 2014;46(1):51-55.
13. Ferreira MAR, Matheson MC, Tang CS, et al. Genome-wide association analysis identifies 11 risk variants associated with the asthma with hay fever phenotype. *J. Allergy Clin. Immunol.* 2014;133(6):1564-1571.
14. Almoguera B, Vazquez L, Mentch F, et al. Identification of Four Novel Loci in Asthma in European and African American Populations. *Am. J. Respir. Crit. Care Med.* 2016.
15. Pickrell JK, Berisa T, Liu JZ, Segurel L, Tung JY, Hinds DA. Detection and interpretation of shared genetic influences on 42 human traits. *Nat. Genet.* 2016;48(7):709-717.
16. Ferreira MA, Vonk JM, Baurecht H, et al. Shared genetic origin of asthma, hay fever and eczema elucidates allergic disease biology. *Nat. Genet.* 2017;49(12):1752-1757.
17. Demenais F, Margaritte-Jeannin P, Barnes KC, et al. Multiancestry association study identifies new asthma risk loci that colocalize with immune-cell enhancer marks. *Nat. Genet.* 2018;50(1):42-53.
18. Hayden LP, Cho MH, Raby BA, Beaty TH, Silverman EK, Hersh CP. Childhood asthma is associated with COPD and known asthma variants in COPD Gene: a genome-wide association study. *Respir. Res.* 2018;19(1):209.
19. Zhu Z, Lee PH, Chaffin MD, et al. A genome-wide cross-trait analysis from UK Biobank highlights the shared genetic architecture of asthma and allergic diseases. *Nat. Genet.* 2018;50(6):857-864.
20. Dahlin A, Sordillo JE, Ziniti J, et al. Large-scale, multiethnic genome-wide association study identifies novel loci contributing to asthma susceptibility in adults. *J. Allergy Clin. Immunol.* 2019;143(4):1633-1635.

21. Pividori M, Schoettler N, Nicolae DL, Ober C, Im HK. Shared and distinct genetic risk factors for childhood-onset and adult-onset asthma: genome-wide and transcriptome-wide studies. *Lancet Respir. Med.* 2019;7(6):509-522.
22. Hancock DB, Eijgelsheim M, Wilk JB, et al. Meta-analyses of genome-wide association studies identify multiple loci associated with pulmonary function. *Nat. Genet.* 2010;42(1):45-52.
23. Repapi E, Sayers I, Wain LV, et al. Genome-wide association study identifies five loci associated with lung function. *Nat. Genet.* 2010;42(1):36-44.
24. Soler Artigas M, Loth DW, Wain LV, et al. Genome-wide association and large-scale follow up identifies 16 new loci influencing lung function. *Nat. Genet.* 2011;43(11):1082-1090.
25. Castaldi PJ, Cho MH, Litonjua AA, et al. The association of genome-wide significant spirometric loci with chronic obstructive pulmonary disease susceptibility. *Am. J. Respir. Cell Mol. Biol.* 2011;45(6):1147-1153.
26. Soler Artigas M, Wain LV, Repapi E, et al. Effect of five genetic variants associated with lung function on the risk of chronic obstructive lung disease, and their joint effects on lung function. *Am. J. Respir. Crit. Care Med.* 2011;184(7):786-795.
27. Wilk JB, Shrine NR, Loehr LR, et al. Genome-wide association studies identify CHRNA5/3 and HTR4 in the development of airflow obstruction. *Am. J. Respir. Crit. Care Med.* 2012;186(7):622-632.
28. Loth DW, Artigas MS, Gharib SA, et al. Genome-wide association analysis identifies six new loci associated with forced vital capacity. *Nat. Genet.* 2014;46(7):669-677.
29. Cho MH, McDonald ML, Zhou X, et al. Risk loci for chronic obstructive pulmonary disease: a genome-wide association study and meta-analysis. *Lancet Respir. Med.* 2014;2(3):214-225.
30. Wain LV, Shrine N, Miller S, et al. Novel insights into the genetics of smoking behaviour, lung function, and chronic obstructive pulmonary disease (UK BiLEVE): a genetic association study in UK Biobank. *Lancet Respir. Med.* 2015;3(10):769-781.
31. Lutz SM, Cho MH, Young K, et al. A genome-wide association study identifies risk loci for spirometric measures among smokers of European and African ancestry. *BMC Genet.* 2015;16(1):138.
32. Soler Artigas M, Wain LV, Miller S, et al. Sixteen new lung function signals identified through 1000 Genomes Project reference panel imputation. *Nat. Commun.* 2015;6:8658.
33. Hobbs BD, Parker MM, Chen H, et al. Exome Array Analysis Identifies a Common Variant in IL27 Associated with Chronic Obstructive Pulmonary Disease. *Am. J. Respir. Crit. Care Med.* 2016;194(1):48-57.
34. Hobbs BD, de Jong K, Lamontagne M, et al. Genetic loci associated with chronic obstructive pulmonary disease overlap with loci for lung function and pulmonary fibrosis. *Nat. Genet.* 2017;49(3):426-432.
35. Wain LV, Shrine N, Artigas MS, et al. Genome-wide association analyses for lung function and chronic obstructive pulmonary disease identify new loci and potential druggable targets. *Nat. Genet.* 2017;49(3):416-425.
36. Wyss AB, Sofer T, Lee MK, et al. Multiethnic meta-analysis identifies ancestry-specific and cross-ancestry loci for pulmonary function. *Nat. Commun.* 2018;9(1):2976.
37. Jackson VE, Latourelle JC, Wain LV, et al. Meta-analysis of exome array data identifies six novel genetic loci for lung function. *Wellcome Open Res.* 2018;3:4.
38. Shrine N, Portelli MA, John C, et al. Moderate-to-severe asthma in individuals of European ancestry: a genome-wide association study. *Lancet Respir. Med.* 2019;7(1):20-34.
39. Sakornsakolpat P, Prokopenko D, Lamontagne M, et al. Genetic landscape of chronic obstructive pulmonary disease identifies heterogeneous cell-type and phenotype associations. *Nat. Genet.* 2019;51(3):494-505.

40. Johansson A, Rask-Andersen M, Karlsson T, Ek WE. Genome-wide association analysis of 350 000 Caucasians from the UK Biobank identifies novel loci for asthma, hay fever and eczema. *Hum. Mol. Genet.* 2019;28(23):4022-4041.
41. Olafsdottir TA, Theodors F, Bjarnadottir K, et al. Eighty-eight variants highlight the role of T cell regulation and airway remodeling in asthma pathogenesis. *Nat. Commun.* 2020;11(1):393.
42. Fried LP, Borhani NO, Enright P, et al. The Cardiovascular Health Study: design and rationale. *Ann. Epidemiol.* 1991;1(3):263-276.
43. Regan EA, Hokanson JE, Murphy JR, et al. Genetic epidemiology of COPD (COPDGene) study design. *COPD.* 2010;7(1):32-43.
44. Gudbjartsson DF, Helgason H, Gudjonsson SA, et al. Large-scale whole-genome sequencing of the Icelandic population. *Nat. Genet.* 2015;47(5):435-444.
45. Gulcher JR, Kristjánsson K, Gudbjartsson H, Stefánsson K. Protection of privacy by third-party encryption in genetic research in Iceland. *Eur. J. Hum. Genet.* 2000;8(10):739-742.
46. Vestbo J, Anderson W, Coxson HO, et al. Evaluation of COPD Longitudinally to Identify Predictive Surrogate End-points (ECLIPSE). *Eur. Respir. J.* 2008;31(4):869-873.
47. Day N, Oakes S, Luben R, et al. EPIC-Norfolk: study design and characteristics of the cohort. European Prospective Investigation of Cancer. *Br. J. Cancer.* 1999;80 Suppl 1:95-103.
48. Henriksen AH, Langhammer A, Steinshamn S, Mai XM, Brumpton BM. The Prevalence and Symptom Profile of Asthma-COPD Overlap: The HUNT Study. *COPD.* 2018;15(1):27-35.
49. Smith BH, Campbell A, Linksted P, et al. Cohort Profile: Generation Scotland: Scottish Family Health Study (GS:SFHS). The study, its participants and their potential for genetic research on health and illness. *Int. J. Epidemiol.* 2013;42(3):689-700.
50. Sørheim IC, Johannessen A, Grydeland TB, Omenaas ER, Gulsvik A, Bakke PS. Case-control studies on risk factors for chronic obstructive pulmonary disease: how does the sampling of the cases and controls affect the results? *Clin. Respir. J.* 2010;4(2):89-96.
51. Banda Y, Kvale MN, Hoffmann TJ, et al. Characterizing Race/Ethnicity and Genetic Ancestry for 100,000 Subjects in the Genetic Epidemiology Research on Adult Health and Aging (GERA) Cohort. *Genetics.* 2015;200(4):1285-1295.
52. Åsvold BO, Langhammer A, Rehn TA, et al. Cohort Profile Update: The HUNT Study, Norway. *medRxiv.* 2021:2021.2010.2012.21264858.
53. Sood A, Stidley CA, Picchi MA, et al. Difference in airflow obstruction between Hispanic and non-Hispanic White female smokers. *COPD.* 2008;5(5):274-281.
54. Hofman A, Brusselle GG, Darwish Murad S, et al. The Rotterdam Study: 2016 objectives and design update. *Eur. J. Epidemiol.* 2015;30(8):661-708.
55. Kreiner-Møller E, Medina-Gomez C, Uitterlinden AG, Rivadeneira F, Estrada K. Improving accuracy of rare variant imputation with a two-step imputation approach. *Eur. J. Hum. Genet.* 2015;23(3):395-400.
56. Couper D, LaVange LM, Han M, et al. Design of the Subpopulations and Intermediate Outcomes in COPD Study (SPIROMICS). *Thorax.* 2014;69(5):491-494.
57. Li X, Ortega VE, Ampleford EJ, et al. Genome-wide association study of lung function and clinical implication in heavy smokers. *BMC Med. Genet.* 2018;19(1):134.
58. Shrine N, Guyatt AL, Erzurumluoglu AM, et al. New genetic signals for lung function highlight pathways and chronic obstructive pulmonary disease associations across multiple ancestries. *Nat. Genet.* 2019;51:481-493.
59. Bycroft C, Freeman C, Petkova D, et al. The UK Biobank resource with deep phenotyping and genomic data. *Nature.* 2018;562(7726):203-209.
60. John C, Reeve NF, Free RC, et al. Cohort Profile: Extended Cohort for E-health, Environment and DNA (EXCEED). *Int. J. Epidemiol.* 2019;48(3):678-679j.
61. Wakefield J. Reporting and interpretation in genome-wide association studies. *Int. J. Epidemiol.* 2008;37(3):641-653.

62. Wang K, Li M, Hakonarson H. ANNOVAR: Functional annotation of genetic variants from next-generation sequencing data. *Nucleic Acids Res.* 2010;38:e164.
63. Kumar P, Henikoff S, Ng PC. Predicting the effects of coding non-synonymous variants on protein function using the SIFT algorithm. *Nat. Protoc.* 2009;4(7):1073-1081.
64. Shihab HA, Gough J, Cooper DN, et al. Predicting the functional, molecular, and phenotypic consequences of amino acid substitutions using hidden Markov models. *Hum. Mutat.* 2013;34(1):57-65.
65. Adzhubei IA, Schmidt S, Peshkin L, et al. A method and server for predicting damaging missense mutations. *Nat. Methods.* 2010;7(4):248-249.
66. Rentzsch P, Witten D, Cooper GM, Shendure J, Kircher M. CADD: predicting the deleteriousness of variants throughout the human genome. *Nucleic Acids Res.* 2019;47(D1):D886-d894.
67. Hao K, Bosse Y, Nickle DC, et al. Lung eQTLs to help reveal the molecular underpinnings of asthma. *PLoS Genet.* 2012;8(11):e1003029.
68. Lamontagne M, Couture C, Postma DS, et al. Refining susceptibility loci of chronic obstructive pulmonary disease with lung eqtls. *PLoS One.* 2013;8(7):e70220.
69. Obeidat M, Miller S, Probert K, et al. GSTCD and INTS12 regulation and expression in the human lung. *PLoS One.* 2013;8(9):e74630.
70. GTEx Consortium. The Genotype-Tissue Expression (GTEx) project. *Nat. Genet.* 2013;45(6):580-585.
71. Giambartolomei C, Vukcevic D, Schadt EE, et al. Bayesian Test for Colocalisation between Pairs of Genetic Association Studies Using Summary Statistics. *PLoS Genet.* 2014;10(5):e1004383.
72. Lamontagne M, Berube JC, Obeidat M, et al. Leveraging lung tissue transcriptome to uncover candidate causal genes in COPD genetic associations. *Hum. Mol. Genet.* 2018;27(10):1819-1829.
73. Martin JS, Xu Z, Reiner AP, et al. HUGIn: Hi-C Unifying Genomic Interrogator. *Bioinformatics.* 2017;33(23):3793-3795.
74. Schmitt AD, Hu M, Jung I, et al. A Compendium of Chromatin Contact Maps Reveals Spatially Active Regions in the Human Genome. *Cell Rep.* 2016;17(8):2042-2059.
75. Ay F, Bailey TL, Noble WS. Statistical confidence estimation for Hi-C data reveals regulatory chromatin contacts. *Genome Res.* 2014;24(6):999-1011.
76. Staley JR, Blackshaw J, Kamat MA, et al. PhenoScanner: a database of human genotype-phenotype associations. *Bioinformatics.* 2016;32(20):3207-3209.

**e-Table 1: Details of ACO case and control definitions, and covariate details in Stage 2 cohorts**

y=years; L=litres; FEV<sub>1</sub>=forced expiratory volume in 1 second; FEV<sub>1</sub>/FVC=ratio of FEV<sub>1</sub> to forced vital capacity (FVC); Aa=African American; Nhw=non-Hispanic white

| Ancestry & Analysis Group                                                       | Study                | Subgroup | N    | Females, % | Age range, y | Mean age, y (SD) | Ever smokers, % | Spirometry available, % | Mean FEV <sub>1</sub> , L (SD) | Mean % predicted FEV <sub>1</sub> (SD) | Mean FEV <sub>1</sub> /FVC (SD) |
|---------------------------------------------------------------------------------|----------------------|----------|------|------------|--------------|------------------|-----------------|-------------------------|--------------------------------|----------------------------------------|---------------------------------|
| African-American                                                                | COPDGene (Aa)        | Cases    | 297  | 55.9%      | 45-78        | 58.2 (8.2)       | 100.0%          | 100.0%                  | 1.33 (0.58)                    | 51.0 (17.6)                            | 0.52 (0.12)                     |
|                                                                                 |                      | Controls | 1335 | 36.3%      | 40-80        | 52.7 (5.9)       | 100.0%          | 100.0%                  | 2.88 (0.65)                    | 99.0 (12.3)                            | 0.80 (0.05)                     |
|                                                                                 |                      | All      | 1632 | 39.8%      | 40-80        | 53.7 (6.78)      | 100.0%          | 100.0%                  | 2.59 (0.87)                    | 90.3 (22.9)                            | 0.75 (0.13)                     |
| European (main meta-analysis only; COPD defined based on spirometry)            | deCODE               | Cases    | 631  | 63.4%      | 1900-1985**  | 1930** (12.3)    | NA              | 100.0%                  | NA                             | 60.0 (15.3)                            | 0.56 (0.10)                     |
|                                                                                 |                      | Controls | 5835 | 56.7%      | 1900-2000    | 1950 (70.7)      | NA              | 100.0%                  | NA                             | 141.6 (46.1)                           | 0.77 (0.17)                     |
|                                                                                 |                      | All      | 6466 | 57.3%      | NA           | NA               | NA              | 100.0%                  | NA                             | 133.6 (50.3)                           | 0.75 (0.18)                     |
|                                                                                 | HUNT                 | Cases    | 1070 | 43.7%      | 19-84        | 58.1 (13.5)      | 81.5%           | 100.0%                  | 1.99 (0.79)                    | 63.9 (15.8)                            | 0.60 (0.10)                     |
|                                                                                 |                      | Controls | 6788 | 56.1%      | 19-89        | 43.2 (14.2)      | 56.7%           | 100.0%                  | 3.48 (0.88)                    | 100.1 (11.3)                           | 0.81 (0.05)                     |
|                                                                                 |                      | All      | 7858 | 54.4%      | 19-89        | 45.2 (14.99)     | 60.1%           | 100.0%                  | 3.28 (1.01)                    | 95.2 (17.2)                            | 0.78 (0.09)                     |
|                                                                                 | Rotterdam Study (RS) | Cases    | 114  | 57.9%      | 50-95        | 69.8 (8.8)       | 72.8%           | 100.0%                  | 1.73*                          | 69.5*                                  | 0.63*                           |
|                                                                                 |                      | Controls | 4183 | 58.1%      | 48-103       | 71.5 (10.5)      | 63.2%           | 100.0%                  | 2.77*                          | 108.6*                                 | 0.79*                           |
|                                                                                 |                      | All      | 4297 | 58.1%      | 48-103       | 71.5 (10.5)      | 63.4%           | 100.0%                  | 2.74*                          | 107.5*                                 | 0.78*                           |
| European (main and sensitivity meta-analyses; COPD defined based on spirometry) | CHS                  | Cases    | 89   | 64.0%      | 65-85        | 71.5 (4.7)       | 67.4%           | 100.0%                  | 1.38 (0.54)                    | 57.0 (16.7)                            | 0.55 (0.10)                     |
|                                                                                 |                      | Controls | 1432 | 67.9%      | 65-92        | 71.8 (5.1)       | 42.3%           | 100.0%                  | 2.36 (0.55)                    | 101.5 (13.0)                           | 0.76 (0.04)                     |
|                                                                                 |                      | All      | 1521 | 67.7%      | 65-92        | 71.8 (5.1)       | 43.8%           | 100.0%                  | 2.30 (0.60)                    | 98.9 (16.9)                            | 0.75 (0.07)                     |
|                                                                                 | COPDGene (Nhw)       | Cases    | 591  | 55.2%      | 45-80        | 63.2 (8.3)       | 100.0%          | 100.0%                  | 1.36 (0.61)                    | 47.5 (17.8)                            | 0.48 (0.13)                     |
|                                                                                 |                      | Controls | 1935 | 47.8%      | 45-80        | 59.5 (8.8)       | 100.0%          | 100.0%                  | 3.01 (0.70)                    | 97.4 (11.1)                            | 0.78 (0.05)                     |
|                                                                                 |                      | All      | 2526 | 49.5%      | 45-80        | 60.4 (8.8)       | 100.0%          | 100.0%                  | 2.62 (0.98)                    | 85.7 (24.8)                            | 0.71 (0.15)                     |
|                                                                                 | ECLIPSE              | Cases    | 326  | 44.2%      | 40-75        | 62.5 (7.7)       | 100.0%          | 100.0%                  | 1.27 (0.50)                    | 46.7 (15.7)                            | 0.44 (0.12)                     |
|                                                                                 |                      | Controls | 137  | 37.2%      | 40-75        | 57.1 (9.5)       | 100.0%          | 100.0%                  | 3.36 (0.80)                    | 108.7 (13.7)                           | 0.80 (0.06)                     |
|                                                                                 |                      | All      | 463  | 42.1%      | 40-75        | 60.9 (8.6)       | 100.0%          | 100.0%                  | 1.88 (1.13)                    | 65.0 (32.1)                            | 0.54 (0.19)                     |

| Ancestry & Analysis Group                                                              | Study                    | Subgroup | N     | Females, % | Age range, y | Mean age, y (SD) | Ever smokers, % | Spirometry available, % | Mean FEV <sub>1</sub> , L (SD) | Mean % predicted FEV <sub>1</sub> (SD) | Mean FEV <sub>1</sub> /FVC (SD) |
|----------------------------------------------------------------------------------------|--------------------------|----------|-------|------------|--------------|------------------|-----------------|-------------------------|--------------------------------|----------------------------------------|---------------------------------|
|                                                                                        | EPIC-Norfolk             | Cases    | 281   | 42.0%      | 43-78        | 62.7 (8.4)       | 66.5%           | 100.0%                  | 1.59 (0.60)                    | 53.9 (14.9)                            | 0.59 (0.09)                     |
|                                                                                        |                          | Controls | 10921 | 53.8%      | 39-79        | 58.4 (9.0)       | 49.9%           | 100.0%                  | 2.80 (0.66)                    | 94.9 (10.1)                            | 0.85 (0.08)                     |
|                                                                                        |                          | All      | 11202 | 53.5%      | 39-79        | 58.5 (9.1)       | 50.3%           | 100.0%                  | 2.77 (0.68)                    | 93.9 (12.1)                            | 0.84 (0.09)                     |
|                                                                                        | FHS                      | Cases    | 139   | 54.7%      | 29-80        | 56.6 (11.5)      | 72.7%           | 100.0%                  | 2.01 (0.72)                    | 64 (12)                                | 0.58 (0.08)                     |
|                                                                                        |                          | Controls | 3707  | 53.4%      | 19-86        | 46.7 (12.8)      | 47.3%           | 100.0%                  | 3.43 (0.83)                    | 102 (11)                               | 0.78 (0.05)                     |
|                                                                                        |                          | All      | 3846  | 53.5%      | 19-86        | 47.1 (12.9)      | 48.2%           | 100.0%                  | 3.38 (0.87)                    | 100 (13)                               | 0.78 (0.06)                     |
|                                                                                        | GenKOLS                  | Cases    | 425   | 49.6%      | 40-85        | 66.0 (9.9)       | 100.0%          | 100.0%                  | 1.36 (0.61)                    | 46.5 (16.7)                            | 0.48 (0.13)                     |
|                                                                                        |                          | Controls | 707   | 47.7%      | 40-85        | 55.6 (9.7)       | 100.0%          | 100.0%                  | 3.28 (0.73)                    | 95.3 (9.2)                             | 0.79 (0.04)                     |
|                                                                                        |                          | All      | 1132  | 48.4%      | 40-85        | 59.5 (11.0)      | 100.0%          | 100.0%                  | 2.56 (1.16)                    | 77.0 (26.8)                            | 0.68(0.17)                      |
|                                                                                        | Generation Scotland (GS) | Cases    | 374   | 61.5%      | 18-83        | 49.2 (15.2)      | 54.8%           | 100.0%                  | 2.18 (0.68)                    | 68.2 (11.2)                            | 0.66 (0.12)                     |
|                                                                                        |                          | Controls | 11939 | 58.2%      | 18-94        | 45.8 (14.1)      | 43.7%           | 100.0%                  | 3.22 (0.81)                    | 96.6 (11.9)                            | 0.8 (0.06)                      |
|                                                                                        |                          | All      | 12313 | 58.3%      | 18-94        | 45.9 (14.2)      | 44.0%           | 100.0%                  | 3.187 (0.83)                   | 96.3 (12.9)                            | 0.79 (0.07)                     |
|                                                                                        | LOVELACE                 | Cases    | 64    | 82.8%      | 41-75        | 60.2 (8.7)       | 100.0%          | 100.0%                  | 1.65 (0.47)                    | 61.1 (13.7)                            | 0.57 (0.10)                     |
|                                                                                        |                          | Controls | 592   | 78.5%      | 40-75        | 54.3 (9.3)       | 100.0%          | 100.0%                  | 2.88 (0.67)                    | 97.5 (11.0)                            | 0.79 (0.04)                     |
|                                                                                        |                          | All      | 656   | 79.0%      | 40-75        | 54.9 (9.4)       | 100.0%          | 100.0%                  | 2.76 (0.75)                    | 93.9 (15.6)                            | 0.76 (0.08)                     |
|                                                                                        | SPIROMICS                | Cases    | 197   | 51.8%      | 41-80        | 64.5 (7.7)       | 100.0%          | 100.0%                  | 2.86 (0.62)                    | 51.9 (17.4)                            | 0.48 (0.12)                     |
|                                                                                        |                          | Controls | 433   | 51.7%      | 40-80        | 63.2 (9.0)       | 100.0%          | 100.0%                  | 2.94 (0.61)                    | 98.2 (11.5)                            | 0.77 (0.04)                     |
|                                                                                        |                          | All      | 630   | 51.7%      | 40-80        | 63.6 (8.6)       | 100.0%          | 100.0%                  | 2.91 (0.62)                    | 83.7 (25.5)                            | 0.68 (0.16)                     |
| European (sensitivity meta-analysis only; COPD defined based on spirometry and/or EHR) | deCODE                   | Cases    | 1888  | 62.7%      | 1895-1975    | 1931 (13.5)      | NA              | 0.0%                    | NA                             | NA                                     | NA                              |
|                                                                                        |                          | Controls | 5835  | 56.7%      | 1900-2000    | 1950 (70.7)      | NA              | 100.0%                  | NA                             | 141.6 (46.1)                           | 0.77 (0.17)                     |
|                                                                                        |                          | All      | 7723  | 58.1%      | NA           | NA               | NA              | NA                      | NA                             | NA                                     | NA                              |
|                                                                                        | FINNCAD/Generisk         | Cases    | 321   | 47.0%      | 34-75        | 58.8 (7.7)       | 100.0%          | 86.6%                   | 1.60 (0.61)                    | 49.2 (15.7)                            | 0.59 (0.14)                     |
|                                                                                        |                          | Controls | 4948  | 63.7%      | 44-66        | 55.6 (5.8)       | 16.9%           | 0.0%                    | NA                             | NA                                     | NA                              |
|                                                                                        |                          | All      | 5269  | 62.7%      | 34-75        | 57.2 (7.2)       | 22.0%           | NA                      | NA                             | NA                                     | NA                              |
|                                                                                        | GERA                     | Cases    | 1237  | 66.9%      | 19->90       | 67.1 (12.3)      | 58.7%           | 0.0%                    | NA                             | NA                                     | NA                              |
| Controls                                                                               |                          | 59457    | 59.0% | 18->90     | 61.9 (13.2)  | 42.7%            | 0.0%            | NA                      | NA                             | NA                                     |                                 |

| Ancestry & Analysis Group | Study                | Subgroup | N     | Females, % | Age range, y | Mean age, y (SD) | Ever smokers, % | Spirometry available, % | Mean FEV <sub>1</sub> , L (SD) | Mean % predicted FEV <sub>1</sub> (SD) | Mean FEV <sub>1</sub> /FVC (SD) |
|---------------------------|----------------------|----------|-------|------------|--------------|------------------|-----------------|-------------------------|--------------------------------|----------------------------------------|---------------------------------|
|                           |                      | All      | 60694 | 59.1%      | 18->90       | 62.0 (13.2)      | 43.0%           | 0.0%                    | NA                             | NA                                     | NA                              |
|                           | HUNT                 | Cases    | 2005  | 48.2%      | 19-90        | 58.8 (14.0)      | 79.9%           | 54.9%                   | 2.01 (0.80)                    | 64.8 (16.6)                            | 0.61 (0.11)                     |
|                           |                      | Controls | 6788  | 56.1%      | 19-89        | 43.2 (14.2)      | 56.7%           | 100.0%                  | 3.48 (0.88)                    | 100.1 (11.3)                           | 0.81 (0.05)                     |
|                           |                      | All      | 8793  | 54.3%      | 19-90        | 46.7 (15.6)      | 62.0%           | 89.7%                   | 3.28 (1.01)                    | 95.2 (17.2)                            | 0.78 (0.09)                     |
|                           | MGB Biobank          | Cases    | 617   | 59.6%      | 25-97        | 67.2 (12.8)      | 62.6%           | 0.0%                    | NA                             | NA                                     | NA                              |
|                           |                      | Controls | 7578  | 56.0%      | 19-102       | 58.9 (16.5)      | 42.9%           | 0.0%                    | NA                             | NA                                     | NA                              |
|                           |                      | All      | 8195  | 56.3%      | 19-102       | 59.5 (16.4)      | 44.4%           | 0.0%                    | NA                             | NA                                     | NA                              |
|                           | Rotterdam Study (RS) | Cases    | 186   | 56.5%      | 50-98        | 69.6             | 74.7%           | 71.5%                   | 1.93*                          | 75.5*                                  | 0.65*                           |
|                           |                      | Controls | 4183  | 58.1%      | 48-103       | 71.5             | 63.2%           | 100.0%                  | 2.77*                          | 108.7*                                 | 0.79*                           |
|                           |                      | All      | 4369  | 58.0%      | 48-103       | 71.5             | 58.0%           | 98.8%                   | 2.74*                          | 107.3*                                 | 0.78*                           |

\*Spirometry details from the Rotterdam Study (RS) in this table are from study visit RS3; all study visits (RS1, RS2, RS3) were used for identification of cases and controls.

\*\*Year of birth given for deCODE study.



**e-Table 2: Details of genotyping and imputation in Stage 2 cohorts**

HWE=Hardy-Weinberg Equilibrium; MAF=Minor Allele Frequency; PCs=principal components; HRC=Haplotype Reference Consortium; GRM=genetic relatedness matrix; GEE=generalised estimating equations; Aa=African American; Nhw=non-Hispanic white

| Study          | Pre-imputation filtering metrics |               |                        |                          |                                                                                                                                                                                                         | Genotyping platform                                                                                                                     | Imputation                                                                                    |                             | Analysis details        |                               |                                                      |                                                                                               |
|----------------|----------------------------------|---------------|------------------------|--------------------------|---------------------------------------------------------------------------------------------------------------------------------------------------------------------------------------------------------|-----------------------------------------------------------------------------------------------------------------------------------------|-----------------------------------------------------------------------------------------------|-----------------------------|-------------------------|-------------------------------|------------------------------------------------------|-----------------------------------------------------------------------------------------------|
|                | Individual call rate             | SNP call rate | SNP HWE P-value filter | SNP MAF filter           | Other filters                                                                                                                                                                                           |                                                                                                                                         | Software                                                                                      | Reference panel             | Genotype data           | Covariates                    | Relatedness                                          | Association software                                                                          |
| CHS            | 95%                              | 97%           | 1.00E-05               | NA                       | >2 duplicate errors or Mendelian inconsistencies, heterozygote frequency = 0, SNP not found in HapMap. Individuals additionally excluded if genotype was discordant with known sex or prior genotyping. | Illumina 370CNV BeadChip                                                                                                                | Michigan imputation server                                                                    | HRC 1.1                     | Dosages                 | Study clinic, 3 PCs           | NA                                                   | R                                                                                             |
| COPDGene (Aa)  | 95%                              | 95%           | 1.00E-03               | 0.05                     | AT/GC SNPs                                                                                                                                                                                              | Illumina Quad610                                                                                                                        | Umich Imputation Server                                                                       | 1000 Genomes v3             | Dosages                 | Age, sex (all smokers).       | All unrelated, pi-hat > 0.125.                       | R                                                                                             |
| COPDGene (Nhw) | 95%                              | 95%           | 1.00E-03               | 0.05                     | AT/GC SNPs                                                                                                                                                                                              | Illumina Quad610                                                                                                                        | Umich Imputation Server                                                                       | HRC 1.1                     | Dosages                 | Age, sex (all smokers).       | All unrelated, pi-hat > 0.125.                       | R                                                                                             |
| deCODE         | 98%                              | 80%           | 1.00E-07               | <0.1 / (2x sample count) | Imputation INFO greater than or equal to 0.8.                                                                                                                                                           | Illumina HumanHap300, HumanCNV370, HumanCNV340, HumanHap610, HumanHap1M, HumanHap660, Omni-1, Omni 2.5, Omni 5, Omni 23 or Omni Express | Software developed at deCODE genetics (Gudbjartsson, D.F. et al. Nat Genet 47, 435-44 (2015)) | See footnote <sup>1</sup>   | Dosages                 | Sex, age, county of origin    | See footnote <sup>2</sup>                            | Software developed at deCODE genetics (Gudbjartsson, D.F. et al. Nat Genet 47, 435-44 (2015)) |
| ECLIPSE        | 95%                              | 95%           | 1.00E-03               | 0.05                     | AT/GC SNPs                                                                                                                                                                                              | Illumina HumanHap 550                                                                                                                   | Umich Imputation Server                                                                       | HRC 1.1                     | Dosages                 | Age, sex (all smokers).       | All unrelated, pi-hat > 0.125.                       | R                                                                                             |
| EPIC-Norfolk   | 95%                              | 95%           | 1.00E-06               | 0                        | Clusters pass Affymetrix SNPish standard tests and thresholds. MAF not significantly affected by plate (exclusion threshold p<9.5e-8 and <20% difference in MAF), Y and MT chromosome removed;          | Affymetrix Axiom UKBiobank                                                                                                              | IMPUTE4 and Sanger Imputation Service                                                         | HRCv1 and UK10K+100Gphase 3 | Posterior probabilities | First 10 principal components | 1st and 2nd degree related individuals were excluded | SNPTEST 2.5.4-beta3                                                                           |

| Study                    | Pre-imputation filtering metrics |               |                        |                                                      |                                                                                                                                                                                 | Genotyping platform                                                              | Imputation                                      |                                                            | Analysis details        |                                            |                                             |                      |
|--------------------------|----------------------------------|---------------|------------------------|------------------------------------------------------|---------------------------------------------------------------------------------------------------------------------------------------------------------------------------------|----------------------------------------------------------------------------------|-------------------------------------------------|------------------------------------------------------------|-------------------------|--------------------------------------------|---------------------------------------------|----------------------|
|                          | Individual call rate             | SNP call rate | SNP HWE P-value filter | SNP MAF filter                                       | Other filters                                                                                                                                                                   |                                                                                  | Software                                        | Reference panel                                            | Genotype data           | Covariates                                 | Relatedness                                 | Association software |
|                          |                                  |               |                        |                                                      | duplicates and unflippable SNPs removed.                                                                                                                                        |                                                                                  |                                                 |                                                            |                         |                                            |                                             |                      |
| FHS                      | 97%                              | 96.9 %        | 1.00E-06               | 0.01                                                 | Remove if number of Mendelian errors >=1000; remove variants at locations that did not map to GRCh37.                                                                           | Affymetrix 500K mapping array plus Affymetrix 50K supplemental array             | HRC server                                      | HRC                                                        | Dosages                 | 2 principal components                     | Used GEE to account for family relatedness  | geepack R package    |
| FINNCAD / Generisk       | 95%                              | 98%           | 1.00E-06               | MAC >=3                                              | Outliers greater than 4 SDs for PC1 and PC2                                                                                                                                     | HumanCoreExome-24v1-0_A                                                          | Beagle 4.1                                      | Finnish SISu v3 (dx.doi.org/10.17504/protocols.io.nmndc5e) | Dosages                 | Age, sex, smoking, 10 principal components | Kinship > 0.3 excluded                      | Plink 2.0            |
| GenKOLS                  | 95%                              | 95%           | 1.00E-03               | 0.05                                                 | AT/GC SNPs                                                                                                                                                                      | Illumina HumanHap 550                                                            | Umich Imputation Server                         | HRC 1.1                                                    | Dosages                 | Age, sex (all smokers).                    | All unrelated, pi-hat > 0.125.              | R                    |
| GERA                     | 95%                              | 95%           | 1.00E-03               | 0.05                                                 | AT/GC SNPs                                                                                                                                                                      | Affymetrix Axiom KP                                                              | Umich Imputation Server                         | HRC 1.1                                                    | Hard calls (INFO > 0.9) | Age, sex, ever smoking.                    | Unrelated                                   | plink2               |
| Generation Scotland (GS) | 97%                              | 98%           | 1.00E-06               | 0.01 for OMNI markers, 0.0001 for Exome Chip markers | NA                                                                                                                                                                              | HumanOmniExpressExome8v1-2_A<br>HumanOmniExpressExome-8v1_A                      | Shapeit v2.r873 + duohmm & PBWT (Sanger server) | HRC 1.1                                                    | Dosages                 | Age, sex, ever smoking.                    | Related individuals included in mixed model | SAIGE                |
| HUNT                     | 99%                              | 99%           | 1.00E-04               | 0.01                                                 | The different arrays were harmonized by reducing to a set of overlapping variants and excluding variants that showed frequency differences >15% between data sets, or that were | Illumina HumanCoreExome arrays (HumanCoreExome12 v1.0, HumanCoreExome12 v1.1 and | Minimac3                                        | HRC+WGS 2200 HUNT individuals                              | Dosages                 | Birth Year, Sex, 4 PCs, batch.             | Generalised logistic mixed model with GRM.  | SAIGE 29.1           |

| Study                                | Pre-imputation filtering metrics |               |                        |                |                                                                                                                                                        | Genotyping platform                                      | Imputation                 |                 | Analysis details         |                                                              |                                                         |                      |
|--------------------------------------|----------------------------------|---------------|------------------------|----------------|--------------------------------------------------------------------------------------------------------------------------------------------------------|----------------------------------------------------------|----------------------------|-----------------|--------------------------|--------------------------------------------------------------|---------------------------------------------------------|----------------------|
|                                      | Individual call rate             | SNP call rate | SNP HWE P-value filter | SNP MAF filter | Other filters                                                                                                                                          |                                                          | Software                   | Reference panel | Genotype data            | Covariates                                                   | Relatedness                                             | Association software |
|                                      |                                  |               |                        |                | monomorphic in one and had MAF > 1% in another data set.                                                                                               | UM HUNT Biobank v1.0)                                    |                            |                 |                          |                                                              |                                                         |                      |
| LOVELACE                             | 99%                              | 99%           | 1.00E-08               | 0.008          | Y and pseudo-autosomal region of X removed; filters for low heterozygosity, non-European ancestry, high relatedness.                                   | Illumine HumanOmni2.5-4v1-H BeadChip                     | Michigan imputation server | HRC 1.1         | Dosages                  | Age, sex (all smokers)                                       | All unrelated, pi-hat > 0.125.                          | R                    |
| Mass General Brigham (MGB) Biobank   | 99%                              | 90%           | NA                     | 0              | Invalid alleles, duplicate, monomorphic, indel, allele mismatch, low call rate, SNPS not in HRC 1.1, discrepancies between predicted and reported sex. | 3 Iterations of Multi-Ethnic Genotyping Array (Illumina) | Minimac4                   | HRC 1.1         | Dosages                  | Age, sex, smoking, principal components.                     | Related individuals excluded; kinship threshold =0.0884 | R                    |
| Rotterdam Study (RS) (I, II and III) | 98%                              | 98%           | 1.00E-06               | 0.01           | Sample exclusion (missing DNA, gender mismatch, excess autosomal heterozygosity, duplicates, ethnic outliers)                                          | Illumina                                                 | Michigan imputation server | HRC 1.1         | Dosages                  | Age, sex, smoking and 4 PCs.                                 | No related individuals included.                        | rvtest*              |
| SPIROMICS                            | 95%                              | 95%           | 1.00E-06               | 0.01           | Sex, ethnicity, relatedness.                                                                                                                           | Illumina HumanOmniExpressExome                           | Michigan Imputation Server | HRC 1.1         | Threshold-assigned calls | Age, sex, current smoking status, smoking pack-years, 5 PCs. | No related individuals included.                        | PLINK1.9             |

<sup>1</sup> deCODE: The GWASs were performed with 32.5 million markers identified through whole-genome sequencing of 28,075 Icelanders to an average genome-wide coverage of 34X; imputed into 155,250 chip-typed individuals, and their first and second degree relatives.

<sup>2</sup> deCODE: Estimating the effective number of cases as  $2 \times N_a \times N_c / (N_a + N_c) / GC$ , where  $N_a$  and  $N_c$  are the number of cases and controls, respectively, and GC is the genomic adjustment factor, estimated using LD-score regression (Bulik-Sullivan, B.K., Nat Gen, 2015), we can calculate the effective sample size

**e-Table 3 Proxy SNPs used in Stage 2 cohorts where lead SNP was missing**

chr:pos=chromosome and position (genome build 37); other/coded (other and coded alleles). Details of proxies in LD (at  $r^2>0.3$ ) with the lead SNP, along with rsIDs are given

| rsid        | chr:pos      | other/coded | Studies in which SNP is missing and proxy with $r^2>0.3$ available (rsID, $r^2$ )     | Studies in which SNP is missing and NO proxy with $r^2>0.3$ available |
|-------------|--------------|-------------|---------------------------------------------------------------------------------------|-----------------------------------------------------------------------|
| rs159960    | 1:8476428    | A/G         | LOVELACE (rs301805, $r^2=0.862$ )                                                     |                                                                       |
| rs41301991  | 1:15287168   | C/T         | LOVELACE (rs12563750, $r^2=0.314$ )                                                   |                                                                       |
| rs34290285  | 2:242698640  | G/A         | LOVELACE (rs7563672, $r^2=0.553$ )                                                    | ECLIPSE, Rotterdam                                                    |
| rs35570272  | 3:33047662   | G/T         | LOVELACE (rs4678523, $r^2=0.581$ )                                                    |                                                                       |
| rs6787279   | 3:57163751   | T/C         |                                                                                       |                                                                       |
| rs62326355  | 4:120141978  | A/G         | LOVELACE (rs17331353, $r^2=0.374$ )                                                   |                                                                       |
| rs17720281  | 4:145543776  | C/T         | LOVELACE (rs17776795, $r^2=1.000$ )                                                   |                                                                       |
| rs16903574  | 5:14610309   | C/G         |                                                                                       |                                                                       |
| rs80101740  | 5:98471135   | A/C         |                                                                                       | LOVELACE                                                              |
| rs1837253   | 5:110401872  | T/C         |                                                                                       |                                                                       |
| rs3749833   | 5:131799626  | T/C         | LOVELACE (rs2548993, $r^2=0.929$ )                                                    |                                                                       |
| rs7383537   | 6:30074872   | C/T         | LOVELACE, GERA (rs2240068, $r^2=0.784$ ); Rotterdam, HUNT (rs12665401, $r^2=0.315$ )  |                                                                       |
| rs9273410   | 6:32627250   | C/A         | LOVELACE, ECLIPSE, Rotterdam (rs1063355, $r^2=0.560$ ); FHS (rs9272346, $r^2=0.558$ ) | GERA                                                                  |
| rs115643887 | 6:109280933  | G/T         | LOVELACE (rs12195848, $r^2=0.995$ )                                                   |                                                                       |
| rs1339248   | 9:78625640   | T/C         | LOVELACE (rs1416553, $r^2=0.996$ )                                                    |                                                                       |
| rs1028655   | 9:101652106  | A/G         |                                                                                       |                                                                       |
| rs2076846   | 10:6063253   | A/G         |                                                                                       |                                                                       |
| rs2033149   | 10:60264741  | A/T         | LOVELACE (rs1658495, $r^2=0.898$ )                                                    |                                                                       |
| rs55646091  | 11:76299431  | G/A         |                                                                                       | LOVELACE                                                              |
| rs4936678   | 11:111625085 | C/T         | LOVELACE (rs4936682, $r^2=0.921$ )                                                    |                                                                       |
| rs56136109  | 12:8211784   | A/G         |                                                                                       | LOVELACE                                                              |
| rs7312770   | 12:56467587  | C/T         | LOVELACE (rs11171739, $r^2=0.754$ )                                                   |                                                                       |

| rsid        | chr:pos      | other/coded | Studies in which SNP is missing and proxy with $r^2 > 0.3$ available (rsID, $r^2$ ) | Studies in which SNP is missing and <b>NO</b> proxy with $r^2 > 0.3$ available |
|-------------|--------------|-------------|-------------------------------------------------------------------------------------|--------------------------------------------------------------------------------|
| rs17241080  | 12:94619773  | C/G         |                                                                                     | LOVELACE                                                                       |
| rs7995004   | 13:44478820  | C/T         | LOVELACE (rs1373904, $r^2=0.989$ )                                                  |                                                                                |
| rs9513600   | 13:99996015  | G/A         | LOVELACE (rs2181502, $r^2=0.982$ )                                                  |                                                                                |
| rs2180369   | 14:93516465  | T/C         |                                                                                     |                                                                                |
| rs118140944 | 14:103650919 | A/G         |                                                                                     | LOVELACE                                                                       |
| rs1031460   | 17:38072247  | T/G         | LOVELACE (rs12603332, $r^2=0.967$ )                                                 |                                                                                |
| rs1029792   | 17:38808941  | G/T         | LOVELACE (rs7209735, $r^2=1.000$ )                                                  |                                                                                |
| rs2584662   | 17:47470487  | A/C         | LOVELACE (rs2584663, $r^2=0.748$ )                                                  |                                                                                |
| rs4804461   | 19:9959556   | C/T         | LOVELACE (rs10415033, $r^2=0.413$ )                                                 |                                                                                |

**e-Table 4: 83 signals discovered in UK Biobank plus sensitivity analyses comparing ACO cases to asthma (not COPD) and COPD (not asthma) control sets**  
chr:pos\_other\_effect=chromosome, position (b37), other allele, effect allele; EAF=frequency of effect allele; Passes prioritisation?=meets P<0.01 threshold in signal prioritisation analyses; OR=odds ratio; LCI/UCI=lower/upper bound of 95% confidence interval; p=p-value. Stage 1 = UK Biobank; Stage 2 = independent follow-up cohorts. Variants taken forward to Stage 2 analyses are set to TRUE in the column 'Passes prioritisation?'

| SNP information |                      |       |              |                |                        |                | UKB (8068 cases, 40360 controls) |       |       |          | UKB (8068 cases, 26815 controls with asthma but not COPD) |       |       |          | UKB (8068 cases, 16762 controls with COPD but not asthma) |       |       |          |
|-----------------|----------------------|-------|--------------|----------------|------------------------|----------------|----------------------------------|-------|-------|----------|-----------------------------------------------------------|-------|-------|----------|-----------------------------------------------------------|-------|-------|----------|
| rsid            | chr:pos_other_effect | EAF   | Gene         | Location       | Passes prioritisation? | Conditioned on | OR                               | LCI   | UCI   | P        | OR                                                        | LCI   | UCI   | P        | OR                                                        | LCI   | UCI   | p        |
| rs159960        | 1:8476428 A G        | 0.559 | RERE         | intronic       | TRUE                   |                | 1.128                            | 1.087 | 1.170 | 1.33E-10 | 1.098                                                     | 1.056 | 1.141 | 2.00E-06 | 1.111                                                     | 1.069 | 1.155 | 9.44E-08 |
| rs41301991      | 1:15287168 C T       | 0.022 | KAZN         | intronic       | TRUE                   |                | 1.394                            | 1.232 | 1.578 | 1.42E-07 | 1.279                                                     | 1.128 | 1.451 | 1.26E-04 | 1.279                                                     | 1.128 | 1.451 | 1.31E-04 |
| rs12123821      | 1:152179152 C T      | 0.049 | HRNR         | intergenic     | FALSE                  |                | 1.280                            | 1.177 | 1.392 | 8.56E-09 | 1.101                                                     | 1.013 | 1.197 | 2.41E-02 | 1.255                                                     | 1.150 | 1.369 | 3.42E-07 |
| rs61816761      | 1:152285861 G A      | 0.023 | FLG          | exonic         | FALSE                  |                | 1.483                            | 1.307 | 1.681 | 8.47E-10 | 1.101                                                     | 0.977 | 1.239 | 1.14E-01 | 1.320                                                     | 1.163 | 1.498 | 1.67E-05 |
| rs4090390       | 1:173146921 C A      | 0.243 | TNFSF4       | intergenic     | FALSE                  |                | 1.110                            | 1.064 | 1.158 | 1.53E-06 | 1.053                                                     | 1.007 | 1.100 | 2.35E-02 | 1.065                                                     | 1.018 | 1.113 | 5.78E-03 |
| rs891058        | 2:8442547 G A        | 0.293 | LINC00299    | ncRNA intronic | FALSE                  |                | 0.888                            | 0.854 | 0.925 | 6.93E-09 | 0.954                                                     | 0.914 | 0.995 | 2.98E-02 | 0.910                                                     | 0.872 | 0.949 | 1.10E-05 |
| rs7563253       | 2:20391281 C G       | 0.471 | SDC1         | intergenic     | FALSE                  |                | 0.915                            | 0.882 | 0.949 | 2.11E-06 | 0.935                                                     | 0.900 | 0.972 | 6.27E-04 | 0.970                                                     | 0.933 | 1.008 | 1.22E-01 |
| rs1420104       | 2:102948470 G A      | 0.390 | IL1RL1       | intronic       | FALSE                  |                | 1.135                            | 1.093 | 1.178 | 3.00E-11 | 1.032                                                     | 0.993 | 1.073 | 1.11E-01 | 1.103                                                     | 1.061 | 1.147 | 7.72E-07 |
| rs6723099       | 2:229592415 T A      | 0.081 | PID1         | intergenic     | FALSE                  |                | 0.834                            | 0.779 | 0.893 | 1.84E-07 | 0.850                                                     | 0.790 | 0.914 | 1.19E-05 | 0.965                                                     | 0.895 | 1.041 | 3.54E-01 |
| rs6747736       | 2:239891054 A C      | 0.617 | FLJ43879     | intergenic     | FALSE                  |                | 1.099                            | 1.058 | 1.140 | 8.31E-07 | 1.094                                                     | 1.052 | 1.138 | 6.90E-06 | 1.022                                                     | 0.982 | 1.063 | 2.92E-01 |
| rs34290285      | 2:242698640 G A      | 0.252 | D2HGDH       | intronic       | TRUE                   |                | 0.862                            | 0.827 | 0.899 | 4.31E-12 | 0.928                                                     | 0.887 | 0.970 | 1.06E-03 | 0.856                                                     | 0.819 | 0.894 | 4.56E-12 |
| rs2442776       | 3:11640601 G A       | 0.863 | VGLL4        | intronic       | FALSE                  |                | 0.870                            | 0.825 | 0.918 | 2.70E-07 | 0.884                                                     | 0.836 | 0.934 | 1.04E-05 | 0.937                                                     | 0.887 | 0.990 | 1.96E-02 |
| rs35570272      | 3:33047662 G T       | 0.398 | GLB1         | intronic       | TRUE                   |                | 1.107                            | 1.066 | 1.149 | 1.06E-07 | 1.054                                                     | 1.014 | 1.096 | 8.03E-03 | 1.086                                                     | 1.044 | 1.129 | 3.60E-05 |
| rs6787279       | 3:57163751 T C       | 0.169 | IL17RD       | intronic       | TRUE                   |                | 0.880                            | 0.838 | 0.924 | 2.69E-07 | 0.931                                                     | 0.885 | 0.981 | 7.20E-03 | 0.921                                                     | 0.874 | 0.970 | 1.88E-03 |
| rs13874         | 3:66419956 C T       | 0.436 | SLC25A26     | exonic         | FALSE                  |                | 1.098                            | 1.058 | 1.139 | 7.04E-07 | 1.068                                                     | 1.027 | 1.110 | 8.57E-04 | 1.047                                                     | 1.008 | 1.088 | 1.92E-02 |
| rs57699322      | 3:128065313 C T      | 0.115 | EEFSEC       | intronic       | FALSE                  |                | 0.874                            | 0.826 | 0.925 | 2.98E-06 | 0.918                                                     | 0.864 | 0.975 | 5.33E-03 | 0.951                                                     | 0.894 | 1.011 | 1.05E-01 |
| rs1420472       | 3:168776326 G T      | 0.438 | MECOM        | intergenic     | FALSE                  |                | 1.104                            | 1.065 | 1.146 | 1.20E-07 | 1.065                                                     | 1.025 | 1.107 | 1.27E-03 | 1.022                                                     | 0.983 | 1.062 | 2.69E-01 |
| rs7640550       | 3:188080248 T C      | 0.503 | LPP          | intronic       | FALSE                  |                | 0.910                            | 0.878 | 0.944 | 4.81E-07 | 0.957                                                     | 0.920 | 0.994 | 2.37E-02 | 0.928                                                     | 0.893 | 0.964 | 1.38E-04 |
| rs73234989      | 4:38754888 G A       | 0.158 | TLR10        | intergenic     | FALSE                  |                | 0.877                            | 0.833 | 0.923 | 4.14E-07 | 0.932                                                     | 0.883 | 0.984 | 1.07E-02 | 0.891                                                     | 0.844 | 0.940 | 2.51E-05 |
| rs34712979      | 4:106819053 G A      | 0.259 | NPNT         | intronic       | FALSE                  |                | 1.210                            | 1.161 | 1.262 | 2.20E-19 | 1.183                                                     | 1.132 | 1.235 | 3.53E-14 | 1.010                                                     | 0.968 | 1.054 | 6.44E-01 |
| rs62326355      | 4:120141978 A G      | 0.017 | USP53        | intronic       | TRUE                   |                | 1.434                            | 1.238 | 1.660 | 1.44E-06 | 1.288                                                     | 1.110 | 1.494 | 8.56E-04 | 1.353                                                     | 1.164 | 1.573 | 8.53E-05 |
| rs6842889       | 4:145479880 T C      | 0.392 | HHIP-AS1     | intergenic     | FALSE                  |                | 0.842                            | 0.811 | 0.874 | 1.58E-19 | 0.844                                                     | 0.812 | 0.878 | 2.39E-17 | 0.983                                                     | 0.944 | 1.023 | 4.01E-01 |
| rs17720281      | 4:145543776 C T      | 0.429 | HHIP-AS1     | intergenic     | TRUE                   | rs6842889      | 1.088                            | 1.050 | 1.127 | 3.77E-06 | 1.075                                                     | 1.036 | 1.115 | 1.09E-04 | 1.080                                                     | 1.039 | 1.124 | 1.12E-04 |
| rs16903574      | 5:14610309 C G       | 0.077 | FAM105A      | exonic         | TRUE                   |                | 1.231                            | 1.148 | 1.319 | 4.47E-09 | 1.115                                                     | 1.040 | 1.197 | 2.37E-03 | 1.185                                                     | 1.103 | 1.273 | 3.21E-06 |
| rs11742240      | 5:35881376 G T       | 0.274 | IL7R         | intergenic     | FALSE                  |                | 0.906                            | 0.870 | 0.944 | 2.08E-06 | 0.972                                                     | 0.931 | 1.016 | 2.06E-01 | 0.946                                                     | 0.906 | 0.988 | 1.17E-02 |
| rs139785776     | 5:43716302 G A       | 0.049 | NNT          | intergenic     | FALSE                  |                | 1.225                            | 1.124 | 1.334 | 3.48E-06 | 1.113                                                     | 1.021 | 1.214 | 1.54E-02 | 1.085                                                     | 0.994 | 1.183 | 6.68E-02 |
| rs80101740      | 5:98471135 A C       | 0.015 | LOC100289230 | intergenic     | TRUE                   |                | 1.443                            | 1.241 | 1.678 | 1.87E-06 | 1.318                                                     | 1.130 | 1.538 | 4.37E-04 | 1.296                                                     | 1.113 | 1.508 | 8.23E-04 |
| rs1837253       | 5:110401872 T C      | 0.739 | TSLP         | intergenic     | TRUE                   |                | 1.222                            | 1.172 | 1.274 | 4.22E-21 | 1.080                                                     | 1.032 | 1.129 | 7.96E-04 | 1.180                                                     | 1.129 | 1.233 | 1.55E-13 |
| rs13182369      | 5:122425832 G T      | 0.375 | PRDM6        | exonic         | FALSE                  |                | 1.094                            | 1.053 | 1.136 | 3.04E-06 | 1.075                                                     | 1.034 | 1.119 | 3.00E-04 | 1.042                                                     | 1.002 | 1.084 | 3.83E-02 |
| rs3749833       | 5:131799626 T C      | 0.263 | C5orf56      | ncRNA intronic | TRUE                   |                | 1.158                            | 1.111 | 1.207 | 3.10E-12 | 1.059                                                     | 1.015 | 1.105 | 8.32E-03 | 1.108                                                     | 1.062 | 1.157 | 2.40E-06 |
| rs2069757       | 5:131998413 G A      | 0.074 | IL13         | intergenic     | FALSE                  | rs3749833      | 1.180                            | 1.101 | 1.265 | 3.25E-06 | 1.030                                                     | 0.965 | 1.098 | 3.78E-01 | 1.122                                                     | 1.045 | 1.203 | 1.42E-03 |
| rs249677        | 5:141539339 C A      | 0.632 | NDFIP1       | intergenic     | FALSE                  |                | 1.095                            | 1.055 | 1.138 | 2.37E-06 | 1.026                                                     | 0.986 | 1.068 | 2.04E-01 | 1.062                                                     | 1.020 | 1.105 | 3.20E-03 |
| rs7733410       | 5:147856522 G A      | 0.442 | HTR4         | intronic       | FALSE                  |                | 0.907                            | 0.874 | 0.940 | 1.48E-07 | 0.933                                                     | 0.897 | 0.969 | 4.05E-04 | 1.015                                                     | 0.976 | 1.055 | 4.65E-01 |
| rs11134789      | 5:156944199 C A      | 0.341 | ADAM19       | intronic       | FALSE                  |                | 1.106                            | 1.065 | 1.150 | 2.36E-07 | 1.082                                                     | 1.040 | 1.126 | 1.16E-04 | 1.016                                                     | 0.976 | 1.057 | 4.45E-01 |
| rs12519165      | 5:170901586 A T      | 0.625 | FGF18        | intergenic     | FALSE                  |                | 0.901                            | 0.867 | 0.936 | 1.05E-07 | 0.899                                                     | 0.863 | 0.936 | 2.68E-07 | 0.956                                                     | 0.919 | 0.995 | 2.92E-02 |
| rs2714335       | 6:7238069 T C        | 0.627 | RREB1        | intronic       | FALSE                  |                | 1.097                            | 1.056 | 1.139 | 1.65E-06 | 1.074                                                     | 1.033 | 1.118 | 3.95E-04 | 1.026                                                     | 0.986 | 1.068 | 2.12E-01 |
| rs6905736       | 6:19843767 C A       | 0.847 | ID4          | intergenic     | FALSE                  |                | 1.131                            | 1.074 | 1.192 | 3.54E-06 | 1.096                                                     | 1.037 | 1.158 | 1.08E-03 | 1.028                                                     | 0.973 | 1.087 | 3.26E-01 |
| rs7383537       | 6:30074872 C T       | 0.372 | TRIM31-AS1   | ncRNA intronic | TRUE                   |                | 0.893                            | 0.859 | 0.928 | 6.96E-09 | 0.920                                                     | 0.884 | 0.958 | 5.07E-05 | 0.930                                                     | 0.893 | 0.969 | 4.56E-04 |

| SNP information |                      |       |              |                |                        |                | UKB (8068 cases, 40360 controls) |       |       |          | UKB (8068 cases, 26815 controls with asthma but not COPD) |       |       |          | UKB (8068 cases, 16762 controls with COPD but not asthma) |       |       |          |
|-----------------|----------------------|-------|--------------|----------------|------------------------|----------------|----------------------------------|-------|-------|----------|-----------------------------------------------------------|-------|-------|----------|-----------------------------------------------------------|-------|-------|----------|
| rsid            | chr:pos_other_effect | EAF   | Gene         | Location       | Passes prioritisation? | Conditioned on | OR                               | LCI   | UCI   | P        | OR                                                        | LCI   | UCI   | P        | OR                                                        | LCI   | UCI   | p        |
| rs11751024      | 6:32586236 C A       | 0.396 | HLA-DQA1     | intergenic     | FALSE                  |                | 0.867                            | 0.835 | 0.900 | 6.62E-14 | 0.977                                                     | 0.939 | 1.017 | 2.52E-01 | 0.851                                                     | 0.818 | 0.885 | 9.19E-16 |
| rs9273410       | 6:32627250 C A       | 0.445 | HLA-DQB1     | UTR3           | TRUE                   |                | 1.237                            | 1.190 | 1.286 | 4.37E-27 | 1.109                                                     | 1.065 | 1.155 | 5.15E-07 | 1.136                                                     | 1.091 | 1.182 | 5.62E-10 |
| rs969577        | 6:90982387 T C       | 0.350 | BACH2        | intronic       | FALSE                  |                | 0.898                            | 0.865 | 0.933 | 3.74E-08 | 0.953                                                     | 0.915 | 0.992 | 1.89E-02 | 0.919                                                     | 0.882 | 0.957 | 3.90E-05 |
| rs115643887     | 6:109280933 G T      | 0.123 | ARMC2        | intronic       | TRUE                   |                | 0.873                            | 0.825 | 0.923 | 1.55E-06 | 0.901                                                     | 0.850 | 0.956 | 5.70E-04 | 0.910                                                     | 0.857 | 0.965 | 1.80E-03 |
| rs9482850       | 6:128293506 C T      | 0.156 | PTPRK        | intronic       | FALSE                  |                | 0.879                            | 0.836 | 0.924 | 4.97E-07 | 0.934                                                     | 0.885 | 0.986 | 1.28E-02 | 0.918                                                     | 0.870 | 0.969 | 1.90E-03 |
| rs262126        | 6:142835364 A C      | 0.312 | LOC153910    | intergenic     | FALSE                  |                | 0.881                            | 0.847 | 0.916 | 2.29E-10 | 0.883                                                     | 0.847 | 0.920 | 3.26E-09 | 1.029                                                     | 0.986 | 1.073 | 1.90E-01 |
| rs12700186      | 7:20416711 T C       | 0.416 | ITGB8        | intronic       | FALSE                  |                | 0.895                            | 0.862 | 0.928 | 3.35E-09 | 0.948                                                     | 0.912 | 0.986 | 7.13E-03 | 0.954                                                     | 0.917 | 0.992 | 1.76E-02 |
| rs10245867      | 7:28142186 G T       | 0.330 | JAZF1        | intronic       | FALSE                  |                | 1.113                            | 1.071 | 1.157 | 6.41E-08 | 1.046                                                     | 1.004 | 1.089 | 2.97E-02 | 1.091                                                     | 1.048 | 1.136 | 2.68E-05 |
| rs7837219       | 8:81283175 G A       | 0.653 | ZBTB10       | intergenic     | FALSE                  |                | 0.913                            | 0.879 | 0.949 | 3.44E-06 | 0.970                                                     | 0.933 | 1.010 | 1.38E-01 | 0.910                                                     | 0.874 | 0.947 | 3.84E-06 |
| rs413382        | 9:6142948 C A        | 0.822 | IL33         | intergenic     | FALSE                  |                | 1.174                            | 1.119 | 1.231 | 4.63E-11 | 1.061                                                     | 1.008 | 1.117 | 2.38E-02 | 1.157                                                     | 1.100 | 1.217 | 1.61E-08 |
| rs2381416       | 9:6193455 C A        | 0.736 | IL33         | intergenic     | FALSE                  |                | 0.845                            | 0.811 | 0.881 | 1.09E-15 | 0.954                                                     | 0.915 | 0.996 | 3.02E-02 | 0.879                                                     | 0.842 | 0.917 | 3.40E-09 |
| rs1339248       | 9:78625640 T C       | 0.142 | PCSK5        | intronic       | TRUE                   |                | 1.135                            | 1.078 | 1.196 | 1.85E-06 | 1.123                                                     | 1.064 | 1.185 | 2.73E-05 | 1.078                                                     | 1.021 | 1.137 | 6.75E-03 |
| rs1028655       | 9:101652106 A G      | 0.620 | GALNT12      | intergenic     | TRUE                   |                | 0.899                            | 0.866 | 0.934 | 3.06E-08 | 0.914                                                     | 0.879 | 0.951 | 7.24E-06 | 0.948                                                     | 0.912 | 0.986 | 8.05E-03 |
| rs2076846       | 10:6063253 A G       | 0.363 | IL2RA        | intronic       | TRUE                   |                | 1.105                            | 1.064 | 1.148 | 2.57E-07 | 1.065                                                     | 1.024 | 1.108 | 1.84E-03 | 1.079                                                     | 1.037 | 1.123 | 1.78E-04 |
| rs2197415       | 10:9062856 T G       | 0.575 | LOC101928272 | intergenic     | FALSE                  |                | 1.127                            | 1.086 | 1.169 | 1.92E-10 | 1.015                                                     | 0.977 | 1.056 | 4.44E-01 | 1.078                                                     | 1.037 | 1.121 | 1.58E-04 |
| rs2033149       | 10:60264741 A T      | 0.437 | BICC1        | intergenic     | TRUE                   |                | 1.093                            | 1.053 | 1.134 | 2.44E-06 | 1.087                                                     | 1.045 | 1.129 | 2.54E-05 | 1.082                                                     | 1.041 | 1.125 | 7.41E-05 |
| rs79860187      | 10:78630609 G A      | 0.019 | KCNMA1       | UTR3           | FALSE                  |                | 1.371                            | 1.199 | 1.568 | 4.08E-06 | 1.191                                                     | 1.042 | 1.362 | 1.05E-02 | 1.186                                                     | 1.037 | 1.355 | 1.24E-02 |
| rs3127449       | 10:79269731 A C      | 0.297 | KCNMA1       | intronic       | FALSE                  |                | 1.098                            | 1.056 | 1.143 | 3.49E-06 | 1.090                                                     | 1.046 | 1.137 | 4.17E-05 | 1.049                                                     | 1.006 | 1.093 | 2.42E-02 |
| rs7936323       | 11:76293758 G A      | 0.480 | C11orf30     | intergenic     | FALSE                  |                | 1.150                            | 1.109 | 1.193 | 6.73E-14 | 1.035                                                     | 0.996 | 1.075 | 7.87E-02 | 1.135                                                     | 1.092 | 1.179 | 9.37E-11 |
| rs55646091      | 11:76299431 G A      | 0.051 | C11orf30     | intergenic     | TRUE                   |                | 1.390                            | 1.279 | 1.511 | 9.23E-15 | 1.136                                                     | 1.047 | 1.233 | 2.25E-03 | 1.273                                                     | 1.170 | 1.385 | 2.23E-08 |
| rs12362635      | 11:86449598 T C      | 0.152 | PRSS23       | intergenic     | FALSE                  |                | 1.126                            | 1.071 | 1.184 | 4.13E-06 | 1.095                                                     | 1.039 | 1.155 | 6.77E-04 | 1.019                                                     | 0.968 | 1.074 | 4.66E-01 |
| rs4936678       | 11:111625085 C T     | 0.255 | PPP2R1B      | intronic       | TRUE                   |                | 0.897                            | 0.860 | 0.936 | 4.26E-07 | 0.927                                                     | 0.887 | 0.969 | 8.39E-04 | 0.909                                                     | 0.869 | 0.950 | 2.63E-05 |
| rs56136109      | 12:8211784 A G       | 0.028 | C3AR1        | exonic         | TRUE                   |                | 0.772                            | 0.691 | 0.862 | 4.07E-06 | 0.835                                                     | 0.741 | 0.942 | 3.30E-03 | 0.846                                                     | 0.749 | 0.955 | 6.97E-03 |
| rs142146039     | 12:19896930 A G      | 0.050 | AEBP2        | intergenic     | FALSE                  |                | 1.218                            | 1.120 | 1.324 | 4.00E-06 | 1.216                                                     | 1.115 | 1.327 | 1.12E-05 | 1.098                                                     | 1.009 | 1.196 | 3.11E-02 |
| rs7312770       | 12:56467587 C T      | 0.495 | ERBB3        | intergenic     | TRUE                   |                | 0.884                            | 0.853 | 0.918 | 5.67E-11 | 0.921                                                     | 0.886 | 0.957 | 2.90E-05 | 0.908                                                     | 0.874 | 0.944 | 8.78E-07 |
| rs703817        | 12:57489828 C T      | 0.518 | STAT6        | UTR3           | FALSE                  |                | 1.100                            | 1.061 | 1.141 | 3.10E-07 | 1.041                                                     | 1.002 | 1.081 | 4.16E-02 | 1.109                                                     | 1.067 | 1.152 | 1.20E-07 |
| rs17241080      | 12:94619773 C G      | 0.058 | PLXNC1       | intronic       | TRUE                   |                | 1.254                            | 1.157 | 1.359 | 3.25E-08 | 1.181                                                     | 1.087 | 1.282 | 7.96E-05 | 1.237                                                     | 1.138 | 1.345 | 5.84E-07 |
| rs7995004       | 13:44478820 C T      | 0.209 | LACC1        | intergenic     | TRUE                   |                | 1.118                            | 1.069 | 1.169 | 1.16E-06 | 1.085                                                     | 1.035 | 1.136 | 6.21E-04 | 1.103                                                     | 1.053 | 1.156 | 3.94E-05 |
| rs9513600       | 13:99996015 G A      | 0.716 | MIR548AN     | ncRNA intronic | TRUE                   |                | 1.123                            | 1.079 | 1.170 | 1.63E-08 | 1.062                                                     | 1.018 | 1.109 | 5.49E-03 | 1.100                                                     | 1.054 | 1.148 | 1.16E-05 |
| rs1950897       | 14:68760141 C T      | 0.712 | RAD51B       | intronic       | FALSE                  |                | 0.898                            | 0.862 | 0.935 | 1.57E-07 | 0.950                                                     | 0.911 | 0.991 | 1.63E-02 | 0.930                                                     | 0.892 | 0.970 | 7.54E-04 |
| rs2180369       | 14:93516465 T C      | 0.113 | ITPK1        | intronic       | TRUE                   |                | 1.170                            | 1.105 | 1.239 | 7.68E-08 | 1.153                                                     | 1.087 | 1.224 | 2.68E-06 | 1.099                                                     | 1.036 | 1.167 | 1.74E-03 |
| rs118140944     | 14:103650919 A G     | 0.033 | LINC00605    | intergenic     | TRUE                   |                | 0.785                            | 0.710 | 0.869 | 2.91E-06 | 0.797                                                     | 0.715 | 0.888 | 4.06E-05 | 0.821                                                     | 0.735 | 0.917 | 4.67E-04 |
| rs12905602      | 15:61064698 G A      | 0.133 | RORA         | intronic       | FALSE                  |                | 0.867                            | 0.822 | 0.914 | 1.51E-07 | 0.929                                                     | 0.877 | 0.984 | 1.22E-02 | 0.860                                                     | 0.812 | 0.910 | 1.62E-07 |
| rs56062135      | 15:67455630 C T      | 0.237 | SMAD3        | intronic       | FALSE                  |                | 1.169                            | 1.121 | 1.220 | 5.67E-13 | 1.025                                                     | 0.981 | 1.070 | 2.72E-01 | 1.166                                                     | 1.116 | 1.219 | 9.88E-12 |
| rs4337253       | 15:71609306 G C      | 0.334 | THSD4        | intronic       | FALSE                  |                | 1.127                            | 1.084 | 1.171 | 1.27E-09 | 1.127                                                     | 1.082 | 1.173 | 6.39E-09 | 0.994                                                     | 0.955 | 1.035 | 7.87E-01 |
| rs283789        | 15:76777577 G A      | 0.675 | SCAPER       | intronic       | FALSE                  |                | 0.911                            | 0.876 | 0.947 | 2.69E-06 | 0.958                                                     | 0.921 | 0.998 | 3.92E-02 | 0.956                                                     | 0.918 | 0.995 | 2.85E-02 |
| rs77203805      | 15:84286544 G A      | 0.112 | SH3GL3       | intronic       | FALSE                  |                | 0.860                            | 0.811 | 0.911 | 3.30E-07 | 0.903                                                     | 0.849 | 0.960 | 1.14E-03 | 0.928                                                     | 0.871 | 0.988 | 1.90E-02 |
| rs2241099       | 16:11225064 C G      | 0.249 | CLEC16A      | intronic       | FALSE                  |                | 0.892                            | 0.855 | 0.931 | 1.29E-07 | 0.961                                                     | 0.919 | 1.005 | 8.01E-02 | 0.909                                                     | 0.869 | 0.950 | 2.57E-05 |
| rs1031460       | 17:38072247 T G      | 0.504 | GSDMB        | intronic       | TRUE                   |                | 1.155                            | 1.113 | 1.197 | 9.96E-15 | 1.065                                                     | 1.025 | 1.106 | 1.25E-03 | 1.161                                                     | 1.118 | 1.206 | 1.59E-14 |
| rs1029792       | 17:38808941 G T      | 0.694 | KRT222       | intergenic     | TRUE                   |                | 1.098                            | 1.055 | 1.143 | 3.67E-06 | 1.074                                                     | 1.030 | 1.119 | 8.50E-04 | 1.102                                                     | 1.057 | 1.149 | 4.64E-06 |
| rs2584662       | 17:47470487 A C      | 0.420 | PHB          | intergenic     | TRUE                   |                | 0.901                            | 0.868 | 0.935 | 3.20E-08 | 0.920                                                     | 0.885 | 0.956 | 2.45E-05 | 0.934                                                     | 0.899 | 0.971 | 6.25E-04 |
| rs631126        | 18:8800723 T C       | 0.751 | MTCL1        | intronic       | FALSE                  |                | 0.897                            | 0.860 | 0.935 | 3.61E-07 | 0.941                                                     | 0.901 | 0.983 | 6.42E-03 | 0.976                                                     | 0.934 | 1.020 | 2.77E-01 |
| rs4804461       | 19:9959556 C T       | 0.249 | PIN1         | intronic       | TRUE                   |                | 0.902                            | 0.865 | 0.941 | 1.73E-06 | 0.929                                                     | 0.889 | 0.971 | 1.13E-03 | 0.925                                                     | 0.885 | 0.967 | 6.27E-04 |
| rs11672303      | 19:33726375 T C      | 0.116 | SLC7A10      | intergenic     | FALSE                  |                | 0.871                            | 0.823 | 0.922 | 1.97E-06 | 0.934                                                     | 0.879 | 0.993 | 2.86E-02 | 0.869                                                     | 0.819 | 0.923 | 4.14E-06 |
| rs5992904       | 22:18415158 A G      | 0.222 | MICAL3       | intronic       | FALSE                  |                | 0.887                            | 0.849 | 0.927 | 9.12E-08 | 0.915                                                     | 0.874 | 0.959 | 1.99E-04 | 0.951                                                     | 0.907 | 0.997 | 3.57E-02 |

**e-Table 5: Comparison of stage 1 results for 31 signals with stage 2 results, and joint analyses**

chr:pos\_other\_effect=chromosome, position (b37), other allele, effect allele; EAF=frequency of effect allele; Novelty (LD)=is SNP in LD with another SNP previously associated with asthma, COPD or lung function; OR=odds ratio, LCI/UCI=lower/upper bound of 95% confidence interval; P=P-value. I<sup>2</sup> (%)=I-squared metric (%) for heterogeneity in meta-analysis. Stage 1 = UK Biobank; Stage 2 = independent follow-up cohorts. Previous asthma (or LF/COPD) SNP (PMID)=name of SNP and PMID where SNP in LD with sentinel at r<sup>2</sup>>0.1 has previously been associated with asthma, or lung function/COPD. For effect allele frequency, gene and location see e-Table 4. Note that the SNP marked with a \* was conditioned on rs6842889.

| SNP information |                      |              |                                                                                                                                                           |                                | Stage 1 (UKB) results (8068 cases, 40360 controls) |       |       |          | Meta-analysis of Stage 2 cohorts (4301 cases, 48609 controls) |       |       |          |                    | Joint analysis of Stage 1 and Stage 2 |       |       |          |                    | COPD Gene African-American (AA) individuals (297 cases, 1335 controls) |       |       |        |       |
|-----------------|----------------------|--------------|-----------------------------------------------------------------------------------------------------------------------------------------------------------|--------------------------------|----------------------------------------------------|-------|-------|----------|---------------------------------------------------------------|-------|-------|----------|--------------------|---------------------------------------|-------|-------|----------|--------------------|------------------------------------------------------------------------|-------|-------|--------|-------|
| rsid            | chr:pos_other_effect | Novelty (LD) | Previous asthma SNP (PMID)                                                                                                                                | Previous LF/COPD SNP (PMID)    | OR                                                 | LCI   | UCI   | P        | OR                                                            | LCI   | UCI   | P        | I <sup>2</sup> (%) | OR                                    | LCI   | UCI   | P        | I <sup>2</sup> (%) | EAF                                                                    | OR    | LCI   | UCI    | P     |
| rs159960        | 1:8476428_A_G        | FALSE        | rs301805 (29785011), rs301806 (29083406)                                                                                                                  | NA                             | 1.128                                              | 1.087 | 1.170 | 1.33E-10 | 1.026                                                         | 0.974 | 1.080 | 3.33E-01 | 0                  | 1.093                                 | 1.060 | 1.126 | 6.65E-09 | 25                 | 0.173                                                                  | 0.904 | 0.685 | 1.194  | 0.479 |
| rs41301991      | 1:15287168_C_T       | TRUE         | NA                                                                                                                                                        | NA                             | 1.394                                              | 1.232 | 1.578 | 1.42E-07 | 1.024                                                         | 0.859 | 1.222 | 7.90E-01 | 0                  | 1.259                                 | 1.138 | 1.394 | 8.14E-06 | 21                 | 0.009                                                                  | 0.332 | 0.058 | 1.894  | 0.215 |
| rs34290285      | 2:24269864_O_G_A     | FALSE        | rs34290285 (29083406, 27182965, 31036433, 29785011)                                                                                                       | NA                             | 0.862                                              | 0.827 | 0.899 | 4.31E-12 | 0.952                                                         | 0.895 | 1.013 | 1.20E-01 | 39                 | 0.890                                 | 0.859 | 0.921 | 4.02E-11 | 53                 | 0.325                                                                  | 0.732 | 0.545 | 0.982  | 0.038 |
| rs35570272      | 3:33047662_G_T       | FALSE        | rs35570272 (31036433), rs6776757 (29083406)                                                                                                               | NA                             | 1.107                                              | 1.066 | 1.149 | 1.06E-07 | 1.077                                                         | 1.023 | 1.135 | 4.67E-03 | 19                 | 1.097                                 | 1.064 | 1.130 | 2.44E-09 | 16                 | 0.245                                                                  | 1.209 | 0.963 | 1.517  | 0.102 |
| rs6787279       | 3:57163751_T_C       | FALSE        | NA                                                                                                                                                        | rs6445932 (30061609, 30804561) | 0.880                                              | 0.838 | 0.924 | 2.69E-07 | 0.909                                                         | 0.848 | 0.974 | 6.51E-03 | 15                 | 0.889                                 | 0.855 | 0.926 | 7.87E-09 | 11                 | 0.433                                                                  | 0.990 | 0.814 | 1.205  | 0.921 |
| rs62326355      | 4:120141978_A_G      | TRUE         | NA                                                                                                                                                        | NA                             | 1.434                                              | 1.238 | 1.660 | 1.44E-06 | 0.957                                                         | 0.797 | 1.149 | 6.40E-01 | 0                  | 1.224                                 | 1.092 | 1.372 | 5.26E-04 | 43                 | 0.002                                                                  | 0.315 | 0.005 | 18.345 | 0.578 |
| rs17720281*     | 4:145543776_C_T      | FALSE        | NA                                                                                                                                                        | rs13116999 (30804560)          | 1.088                                              | 1.050 | 1.127 | 3.77E-06 | 1.010                                                         | 0.961 | 1.063 | 6.88E-01 | 28                 | 1.062                                 | 1.031 | 1.093 | 6.03E-05 | 42                 | 0.248                                                                  | 1.076 | 0.861 | 1.346  | 0.518 |
| rs16903574      | 5:14610309_C_G       | FALSE        | rs16903574 (29083406, 31036433)                                                                                                                           | NA                             | 1.231                                              | 1.148 | 1.319 | 4.47E-09 | 1.134                                                         | 1.031 | 1.248 | 9.96E-03 | 0                  | 1.197                                 | 1.131 | 1.266 | 3.80E-10 | 0                  | 0.014                                                                  | 2.201 | 1.102 | 4.396  | 0.025 |
| rs80101740      | 5:98471135_A_C       | TRUE         | NA                                                                                                                                                        | NA                             | 1.443                                              | 1.241 | 1.678 | 1.87E-06 | 1.371                                                         | 1.097 | 1.714 | 5.49E-03 | 0                  | 1.420                                 | 1.253 | 1.609 | 3.72E-08 | 0                  | 0.003                                                                  | 0.830 | 0.135 | 5.094  | 0.840 |
| rs1837253       | 5:110401872_T_C      | FALSE        | rs1837253 (24388013, 29083406, 21804548, 27182965, 31036433, 21804549, 29785011), rs10455025 (29273806)                                                   | NA                             | 1.222                                              | 1.172 | 1.274 | 4.22E-21 | 1.060                                                         | 1.001 | 1.122 | 4.44E-02 | 0                  | 1.162                                 | 1.124 | 1.202 | 1.53E-18 | 53                 | 0.711                                                                  | 1.106 | 0.898 | 1.361  | 0.344 |
| rs3749833       | 5:131799626_T_C      | FALSE        | rs17622378 (31036433), rs3749833 (29083406), rs2548992 (29785011)                                                                                         | rs3843503 (28166213)           | 1.158                                              | 1.111 | 1.207 | 3.10E-12 | 1.060                                                         | 1.002 | 1.121 | 4.21E-02 | 0                  | 1.123                                 | 1.086 | 1.160 | 9.37E-12 | 14                 | 0.106                                                                  | 1.040 | 0.755 | 1.432  | 0.809 |
| rs7383537       | 6:30074872_C_T       | FALSE        | rs1056241 (29083406), rs1117490 (31036433)                                                                                                                | NA                             | 0.893                                              | 0.859 | 0.928 | 6.96E-09 | 0.979                                                         | 0.928 | 1.033 | 4.39E-01 | 0                  | 0.921                                 | 0.893 | 0.950 | 2.43E-07 | 33                 | 0.547                                                                  | 0.947 | 0.781 | 1.149  | 0.584 |
| rs9273410       | 6:32627250_C_A       | FALSE        | rs1117490 (31036433), rs9272346 (27182965, 29273806), rs17843604 (30578877), rs28407950 (31036433), rs34004019 (29083406), rs1063355 (24388013, 29785011) | rs9274247 (26423011)           | 1.237                                              | 1.190 | 1.286 | 4.37E-27 | 1.111                                                         | 1.046 | 1.181 | 6.42E-04 | 0                  | 1.199                                 | 1.161 | 1.239 | 9.19E-28 | 29                 | 0.415                                                                  | 0.974 | 0.761 | 1.246  | 0.833 |



|             |                  |       |                                                                                                                                                                                                                                                            |                                             |       |       |       |          |       |       |       |          |    |       |       |       |          |    |       |       |       |       |       |
|-------------|------------------|-------|------------------------------------------------------------------------------------------------------------------------------------------------------------------------------------------------------------------------------------------------------------|---------------------------------------------|-------|-------|-------|----------|-------|-------|-------|----------|----|-------|-------|-------|----------|----|-------|-------|-------|-------|-------|
| rs115643887 | 6:109280933_G_T  | TRUE  | NA                                                                                                                                                                                                                                                         | NA                                          | 0.873 | 0.825 | 0.923 | 1.55E-06 | 0.948 | 0.877 | 1.025 | 1.84E-01 | 1  | 0.897 | 0.858 | 0.939 | 2.82E-06 | 14 | 0.118 | 1.181 | 0.888 | 1.570 | 0.254 |
| rs1339248   | 9:78625640_T_C   | TRUE  | NA                                                                                                                                                                                                                                                         | NA                                          | 1.135 | 1.078 | 1.196 | 1.85E-06 | 1.023 | 0.948 | 1.103 | 5.62E-01 | 22 | 1.098 | 1.052 | 1.146 | 2.09E-05 | 37 | 0.147 | 0.769 | 0.572 | 1.032 | 0.080 |
| rs1028655   | 9:101652106_A_G  | FALSE | NA                                                                                                                                                                                                                                                         | rs57649467 (30804560)                       | 0.899 | 0.866 | 0.934 | 3.06E-08 | 0.998 | 0.947 | 1.052 | 9.42E-01 | 20 | 0.931 | 0.903 | 0.960 | 5.21E-06 | 49 | 0.786 | 0.772 | 0.616 | 0.967 | 0.024 |
| rs2076846   | 10:6063253_A_G   | FALSE | rs4747846 (29083406), rs61839660 (29083406, 29785011)                                                                                                                                                                                                      | NA                                          | 1.105 | 1.064 | 1.148 | 2.57E-07 | 1.027 | 0.974 | 1.082 | 3.24E-01 | 51 | 1.078 | 1.045 | 1.111 | 2.01E-06 | 56 | 0.125 | 1.029 | 0.777 | 1.361 | 0.843 |
| rs2033149   | 10:60264741_A_T  | TRUE  | NA                                                                                                                                                                                                                                                         | NA                                          | 1.093 | 1.053 | 1.134 | 2.44E-06 | 1.001 | 0.952 | 1.054 | 9.56E-01 | 0  | 1.060 | 1.029 | 1.092 | 1.23E-04 | 30 | 0.747 | 1.062 | 0.838 | 1.346 | 0.618 |
| rs55646091  | 11:76299431_G_A  | FALSE | rs61894547 (31036433), rs55646091 (29083406)                                                                                                                                                                                                               | NA                                          | 1.390 | 1.279 | 1.511 | 9.23E-15 | 0.986 | 0.871 | 1.115 | 8.19E-01 | 0  | 1.248 | 1.165 | 1.338 | 3.12E-10 | 60 | 0.007 | 1.456 | 0.438 | 4.847 | 0.540 |
| rs4936678   | 11:111625085_C_T | FALSE | rs659529 (29785011), rs7130753 (29083406)                                                                                                                                                                                                                  | NA                                          | 0.897 | 0.860 | 0.936 | 4.26E-07 | 0.944 | 0.890 | 1.000 | 5.13E-02 | 30 | 0.913 | 0.882 | 0.944 | 1.57E-07 | 32 | 0.070 | 1.003 | 0.666 | 1.513 | 0.987 |
| rs56136109  | 12:8211784_A_G   | TRUE  | NA                                                                                                                                                                                                                                                         | NA                                          | 0.772 | 0.691 | 0.862 | 4.07E-06 | 1.003 | 0.841 | 1.195 | 9.75E-01 | 17 | 0.831 | 0.757 | 0.912 | 1.02E-04 | 39 | 0.006 | 0.185 | 0.023 | 1.458 | 0.109 |
| rs7312770   | 12:56467587_C_T  | FALSE | rs705699 (31036433), rs10876864 (29083406, 29785011), rs1701704 (21804548)                                                                                                                                                                                 | rs1689510 (30061609)                        | 0.884 | 0.853 | 0.918 | 5.67E-11 | 0.960 | 0.913 | 1.010 | 1.18E-01 | 17 | 0.910 | 0.883 | 0.937 | 4.91E-10 | 40 | 0.482 | 1.096 | 0.904 | 1.328 | 0.351 |
| rs17241080  | 12:94619773_C_G  | TRUE  | NA                                                                                                                                                                                                                                                         | NA                                          | 1.254 | 1.157 | 1.359 | 3.25E-08 | 1.073 | 0.961 | 1.199 | 2.08E-01 | 0  | 1.188 | 1.114 | 1.268 | 1.90E-07 | 26 | 0.008 | 1.706 | 0.453 | 6.419 | 0.429 |
| rs7995004   | 13:44478820_C_T  | FALSE | rs9316059 (31361310)                                                                                                                                                                                                                                       | NA                                          | 1.118 | 1.069 | 1.169 | 1.16E-06 | 1.013 | 0.950 | 1.079 | 6.95E-01 | 42 | 1.082 | 1.043 | 1.122 | 2.67E-05 | 52 | 0.306 | 1.053 | 0.854 | 1.298 | 0.631 |
| rs9513600   | 13:99996015_G_A  | FALSE | rs1887704 (31036433)                                                                                                                                                                                                                                       | NA                                          | 1.123 | 1.079 | 1.170 | 1.63E-08 | 1.042 | 0.985 | 1.102 | 1.56E-01 | 0  | 1.095 | 1.060 | 1.132 | 6.05E-08 | 18 | 0.370 | 1.110 | 0.912 | 1.352 | 0.297 |
| rs2180369   | 14:93516465_T_C  | TRUE  | NA                                                                                                                                                                                                                                                         | NA                                          | 1.170 | 1.105 | 1.239 | 7.68E-08 | 1.064 | 0.985 | 1.149 | 1.17E-01 | 35 | 1.131 | 1.080 | 1.184 | 1.50E-07 | 42 | 0.174 | 1.002 | 0.776 | 1.294 | 0.990 |
| rs118140944 | 14:103650919_A_G | TRUE  | NA                                                                                                                                                                                                                                                         | NA                                          | 0.785 | 0.710 | 0.869 | 2.91E-06 | 0.930 | 0.805 | 1.073 | 3.19E-01 | 0  | 0.830 | 0.764 | 0.902 | 1.10E-05 | 19 | 0.006 | 0.445 | 0.059 | 3.329 | 0.430 |
| rs1031460   | 17:38072247_T_G  | FALSE | rs2952156 (29273806), rs11655198 (27182965), rs4795399 (31036433), rs2305480 (24241537, 20860503), rs11078927 (21804549), rs869402 (29785011), rs921650 (29083406), rs7216389 (17611496), rs4794820 (22561531), rs3894194 (20860503), rs7212938 (24388013) | rs8069451 (30061609), rs62065216 (30804561) | 1.155 | 1.113 | 1.197 | 9.96E-15 | 1.048 | 0.996 | 1.102 | 6.88E-02 | 47 | 1.117 | 1.085 | 1.151 | 2.06E-13 | 60 | 0.814 | 1.020 | 0.796 | 1.305 | 0.878 |
| rs1029792   | 17:38808941_G_T  | FALSE | rs757411 (29083406), rs9911533 (29785011)                                                                                                                                                                                                                  | NA                                          | 1.098 | 1.055 | 1.143 | 3.67E-06 | 0.966 | 0.915 | 1.020 | 2.09E-01 | 40 | 1.050 | 1.017 | 1.084 | 2.84E-03 | 63 | 0.828 | 1.090 | 0.839 | 1.417 | 0.518 |
| rs2584662   | 17:47470487_A_C  | FALSE | rs9889262 (29083406), rs28406364 (31036433), rs17637472 (29273806)                                                                                                                                                                                         | NA                                          | 0.901 | 0.868 | 0.935 | 3.20E-08 | 0.951 | 0.904 | 1.002 | 5.89E-02 | 35 | 0.918 | 0.890 | 0.946 | 2.21E-08 | 40 | 0.604 | 0.949 | 0.772 | 1.167 | 0.622 |
| rs4804461   | 19:9959556_C_T   | TRUE  | NA                                                                                                                                                                                                                                                         | NA                                          | 0.902 | 0.865 | 0.941 | 1.73E-06 | 1.020 | 0.959 | 1.085 | 5.30E-01 | 17 | 0.938 | 0.906 | 0.971 | 3.28E-04 | 49 | 0.149 | 0.816 | 0.606 | 1.097 | 0.179 |

**e-Table 6: Comparison of Stage 1 results for 31 signals with Stage 2 cohorts (sensitivity analysis), and corresponding joint analyses**

chr:pos\_other\_effect=chromosome, position (b37), other allele, effect allele; Novelty (LD)=is SNP in LD with another SNP previously associated with asthma, COPD or lung function; OR=odds ratio, LCI/UCI=lower/upper bound of 95% confidence interval; P=P-value. I<sup>2</sup> (%)=I-squared metric (%) for heterogeneity in meta-analysis. Stage 1 = UK Biobank; Stage 2 = independent follow-up cohorts. Previous asthma (or LF/COPD) SNP (PMID)=name of SNP and PMID where SNP in LD with sentinel at r<sup>2</sup>>0.1 has previously been associated with asthma, or lung function/COPD.

For effect allele frequency, gene and location see e-Table 4. Note that the SNP marked with a \* was conditioned on rs6842889.

| SNP information |                      |              |                                                                                                                                                           |                                | Stage 1 (UKB) results (8068 cases, 40360 controls) |       |       |          | Meta-analysis of Stage 2 cohorts (sensitivity analysis) (9638 cases and 128273 controls) |       |       |          |                    | Sensitivity analysis (Joint analysis of Stage 1 and Stage 2) |       |       |          |                    |
|-----------------|----------------------|--------------|-----------------------------------------------------------------------------------------------------------------------------------------------------------|--------------------------------|----------------------------------------------------|-------|-------|----------|------------------------------------------------------------------------------------------|-------|-------|----------|--------------------|--------------------------------------------------------------|-------|-------|----------|--------------------|
| rsid            | chr:pos_other_effect | Novelty (LD) | Previous asthma SNP (PMID)                                                                                                                                | Previous LF/COPD SNP (PMID)    | OR                                                 | LCI   | UCI   | P        | OR                                                                                       | LCI   | UCI   | P        | I <sup>2</sup> (%) | OR                                                           | LCI   | UCI   | P        | I <sup>2</sup> (%) |
| rs159960        | 1:8476428_A_G        | FALSE        | rs301805 (29785011), rs301806 (29083406)                                                                                                                  | NA                             | 1.128                                              | 1.087 | 1.170 | 1.33E-10 | 1.018                                                                                    | 0.983 | 1.054 | 3.25E-01 | 0                  | 1.069                                                        | 1.042 | 1.097 | 2.51E-07 | 35                 |
| rs41301991      | 1:15287168_C_T       | TRUE         | NA                                                                                                                                                        | NA                             | 1.394                                              | 1.232 | 1.578 | 1.42E-07 | 1.004                                                                                    | 0.889 | 1.133 | 9.55E-01 | 0                  | 1.179                                                        | 1.081 | 1.286 | 1.95E-04 | 43                 |
| rs34290285      | 2:242698640_G_A      | FALSE        | rs34290285 (29083406, 27182965, 31036433, 29785011)                                                                                                       | NA                             | 0.862                                              | 0.827 | 0.899 | 4.31E-12 | 0.950                                                                                    | 0.910 | 0.991 | 1.76E-02 | 19                 | 0.904                                                        | 0.878 | 0.932 | 4.12E-11 | 48                 |
| rs35570272      | 3:33047662_G_T       | FALSE        | rs35570272 (31036433), rs6776757 (29083406)                                                                                                               | NA                             | 1.107                                              | 1.066 | 1.149 | 1.06E-07 | 1.025                                                                                    | 0.990 | 1.062 | 1.60E-01 | 46                 | 1.063                                                        | 1.036 | 1.090 | 3.11E-06 | 57                 |
| rs6787279       | 3:57163751_T_C       | FALSE        | NA                                                                                                                                                        | rs6445932 (30061609, 30804561) | 0.880                                              | 0.838 | 0.924 | 2.69E-07 | 0.966                                                                                    | 0.922 | 1.012 | 1.41E-01 | 42                 | 0.924                                                        | 0.894 | 0.956 | 4.01E-06 | 52                 |
| rs62326355      | 4:120141978_A_G      | TRUE         | NA                                                                                                                                                        | NA                             | 1.434                                              | 1.238 | 1.660 | 1.44E-06 | 0.974                                                                                    | 0.858 | 1.106 | 6.86E-01 | 0                  | 1.149                                                        | 1.044 | 1.265 | 4.47E-03 | 44                 |
| rs17720281*     | 4:145543776_C_T      | FALSE        | NA                                                                                                                                                        | rs13116999 (30804560)          | 1.088                                              | 1.050 | 1.127 | 3.77E-06 | 0.983                                                                                    | 0.950 | 1.018 | 3.38E-01 | 18                 | 1.033                                                        | 1.007 | 1.059 | 1.11E-02 | 54                 |
| rs16903574      | 5:14610309_C_G       | FALSE        | rs16903574 (29083406, 31036433)                                                                                                                           | NA                             | 1.231                                              | 1.148 | 1.319 | 4.47E-09 | 1.091                                                                                    | 1.021 | 1.165 | 9.93E-03 | 0                  | 1.155                                                        | 1.101 | 1.212 | 3.40E-09 | 25                 |
| rs80101740      | 5:98471135_A_C       | TRUE         | NA                                                                                                                                                        | NA                             | 1.443                                              | 1.241 | 1.678 | 1.87E-06 | 1.189                                                                                    | 1.017 | 1.390 | 3.04E-02 | 12                 | 1.314                                                        | 1.179 | 1.465 | 8.05E-07 | 22                 |
| rs1837253       | 5:110401872_T_C      | FALSE        | rs1837253 (24388013, 29083406, 21804548, 27182965, 31036433, 21804549, 29785011), rs10455025 (29273806)                                                   | NA                             | 1.222                                              | 1.172 | 1.274 | 4.22E-21 | 1.035                                                                                    | 0.996 | 1.076 | 8.31E-02 | 0                  | 1.118                                                        | 1.087 | 1.150 | 1.34E-14 | 64                 |
| rs3749833       | 5:131799626_T_C      | FALSE        | rs17622378 (31036433), rs3749833 (29083406), rs2548992 (29785011)                                                                                         | rs3843503 (28166213)           | 1.158                                              | 1.111 | 1.207 | 3.10E-12 | 1.036                                                                                    | 0.997 | 1.077 | 7.10E-02 | 0                  | 1.092                                                        | 1.061 | 1.123 | 1.14E-09 | 38                 |
| rs7383537       | 6:30074872_C_T       | FALSE        | rs1056241 (29083406), rs1117490 (31036433)                                                                                                                | NA                             | 0.893                                              | 0.859 | 0.928 | 6.96E-09 | 0.972                                                                                    | 0.938 | 1.007 | 1.20E-01 | 0                  | 0.934                                                        | 0.910 | 0.959 | 3.66E-07 | 25                 |
| rs9273410       | 6:32627250_C_A       | FALSE        | rs1117490 (31036433), rs9272346 (27182965, 29273806), rs17843604 (30578877), rs28407950 (31036433), rs34004019 (29083406), rs1063355 (24388013, 29785011) | rs9274247 (26423011)           | 1.237                                              | 1.190 | 1.286 | 4.37E-27 | 1.103                                                                                    | 1.055 | 1.153 | 1.55E-05 | 0                  | 1.178                                                        | 1.144 | 1.213 | 5.26E-28 | 32                 |
| rs115643887     | 6:109280933_G_T      | TRUE         | NA                                                                                                                                                        | NA                             | 0.873                                              | 0.825 | 0.923 | 1.55E-06 | 0.985                                                                                    | 0.934 | 1.038 | 5.71E-01 | 0                  | 0.930                                                        | 0.895 | 0.966 | 2.01E-04 | 24                 |
| rs1339248       | 9:78625640_T_C       | TRUE         | NA                                                                                                                                                        | NA                             | 1.135                                              | 1.078 | 1.196 | 1.85E-06 | 1.024                                                                                    | 0.972 | 1.079 | 3.68E-01 | 26                 | 1.078                                                        | 1.039 | 1.118 | 6.35E-05 | 43                 |

|            |                  |       |                                                                                                                                                                                                                                                             |                                             |       |       |       |          |       |       |       |          |    |       |       |       |          |    |
|------------|------------------|-------|-------------------------------------------------------------------------------------------------------------------------------------------------------------------------------------------------------------------------------------------------------------|---------------------------------------------|-------|-------|-------|----------|-------|-------|-------|----------|----|-------|-------|-------|----------|----|
| rs1028655  | 9:101652106_A_G  | FALSE | NA                                                                                                                                                                                                                                                          | rs57649467 (30804560)                       | 0.899 | 0.866 | 0.934 | 3.06E-08 | 0.994 | 0.959 | 1.030 | 7.45E-01 | 3  | 0.948 | 0.924 | 0.973 | 4.92E-05 | 48 |
| rs2076846  | 10:6063253_A_G   | FALSE | rs4747846 (29083406), rs61839660 (29083406, 29785011)                                                                                                                                                                                                       | NA                                          | 1.105 | 1.064 | 1.148 | 2.57E-07 | 1.003 | 0.968 | 1.040 | 8.67E-01 | 52 | 1.050 | 1.023 | 1.078 | 2.56E-04 | 65 |
| rs2033149  | 10:60264741_A_T  | TRUE  | NA                                                                                                                                                                                                                                                          | NA                                          | 1.093 | 1.053 | 1.134 | 2.44E-06 | 1.010 | 0.976 | 1.046 | 5.71E-01 | 0  | 1.048 | 1.022 | 1.075 | 2.82E-04 | 19 |
| rs55646091 | 11:76299431_G_A  | FALSE | rs61894547 (31036433), rs55646091 (29083406)                                                                                                                                                                                                                | NA                                          | 1.390 | 1.279 | 1.511 | 9.23E-15 | 1.063 | 0.980 | 1.153 | 1.39E-01 | 0  | 1.211 | 1.143 | 1.284 | 1.01E-10 | 51 |
| rs4936678  | 11:111625085_C_T | FALSE | rs659529 (29785011), rs7130753 (29083406)                                                                                                                                                                                                                   | NA                                          | 0.897 | 0.860 | 0.936 | 4.26E-07 | 0.967 | 0.929 | 1.007 | 1.02E-01 | 16 | 0.933 | 0.907 | 0.961 | 3.00E-06 | 35 |
| rs56136109 | 12:8211784_A_G   | TRUE  | NA                                                                                                                                                                                                                                                          | NA                                          | 0.772 | 0.691 | 0.862 | 4.07E-06 | 0.984 | 0.882 | 1.098 | 7.74E-01 | 26 | 0.872 | 0.806 | 0.942 | 5.42E-04 | 48 |
| rs7312770  | 12:56467587_C_T  | FALSE | rs705699 (31036433), rs10876864 (29083406, 29785011), rs1701704 (21804548)                                                                                                                                                                                  | rs1689510 (30061609)                        | 0.884 | 0.853 | 0.918 | 5.67E-11 | 0.983 | 0.950 | 1.018 | 3.47E-01 | 0  | 0.936 | 0.912 | 0.959 | 2.19E-07 | 47 |
| rs17241080 | 12:94619773_C_G  | TRUE  | NA                                                                                                                                                                                                                                                          | NA                                          | 1.254 | 1.157 | 1.359 | 3.25E-08 | 1.054 | 0.965 | 1.150 | 2.41E-01 | 0  | 1.158 | 1.092 | 1.229 | 1.14E-06 | 24 |
| rs7995004  | 13:44478820_C_T  | FALSE | rs9316059 (31361310)                                                                                                                                                                                                                                        | NA                                          | 1.118 | 1.069 | 1.169 | 1.16E-06 | 1.000 | 0.958 | 1.043 | 9.95E-01 | 0  | 1.054 | 1.022 | 1.087 | 8.37E-04 | 39 |
| rs9513600  | 13:99996015_G_A  | FALSE | rs1887704 (31036433)                                                                                                                                                                                                                                        | NA                                          | 1.123 | 1.079 | 1.170 | 1.63E-08 | 1.033 | 0.995 | 1.073 | 9.07E-02 | 0  | 1.075 | 1.045 | 1.105 | 3.35E-07 | 0  |
| rs2180369  | 14:93516465_T_C  | TRUE  | NA                                                                                                                                                                                                                                                          | NA                                          | 1.170 | 1.105 | 1.239 | 7.68E-08 | 1.019 | 0.966 | 1.076 | 4.87E-01 | 0  | 1.088 | 1.046 | 1.132 | 2.63E-05 | 41 |
| rs11814094 | 14:103650919_A_G | TRUE  | NA                                                                                                                                                                                                                                                          | NA                                          | 0.785 | 0.710 | 0.869 | 2.91E-06 | 0.971 | 0.875 | 1.077 | 5.76E-01 | 0  | 0.871 | 0.810 | 0.936 | 1.86E-04 | 30 |
| rs1031460  | 17:38072247_T_G  | FALSE | rs2952156 (29273806), rs11655198 (27182965), rs4795399 (31036433), rs2305480 (24241537, 20860503), rs11078927 (21804549), rs869402 (29785011), rs921650 (29083406), rs7216389 (1.7611496), rs4794820 (22561531), rs3894194 (20860503), rs7212938 (24388013) | rs8069451 (30061609), rs62065216 (30804561) | 1.155 | 1.113 | 1.197 | 9.96E-15 | 1.048 | 1.013 | 1.085 | 7.12E-03 | 33 | 1.097 | 1.070 | 1.125 | 3.46E-13 | 57 |
| rs1029792  | 17:38808941_G_T  | FALSE | rs757411 (29083406), rs9911533 (29785011)                                                                                                                                                                                                                   | NA                                          | 1.098 | 1.055 | 1.143 | 3.67E-06 | 0.982 | 0.947 | 1.019 | 3.31E-01 | 3  | 1.034 | 1.006 | 1.062 | 1.53E-02 | 51 |
| rs2584662  | 17:47470487_A_C  | FALSE | rs9889262 (29083406), rs28406364 (31036433), rs17637472 (29273806)                                                                                                                                                                                          | NA                                          | 0.901 | 0.868 | 0.935 | 3.20E-08 | 0.965 | 0.932 | 1.000 | 4.69E-02 | 36 | 0.934 | 0.911 | 0.958 | 1.60E-07 | 48 |
| rs4804461  | 19:9959556_C_T   | TRUE  | NA                                                                                                                                                                                                                                                          | NA                                          | 0.902 | 0.865 | 0.941 | 1.73E-06 | 1.004 | 0.963 | 1.046 | 8.62E-01 | 11 | 0.953 | 0.925 | 0.981 | 1.31E-03 | 47 |

**e-Table 7: Results of analyses stratified by age of asthma onset and by smoking status**

chr:pos (other/effect)=chromosome, position (b37), other allele, effect allele; EAF=frequency of effect allele; OR=odds ratio, LCI/UCI=lower/upper bound of 95% confidence interval; p=p-value.

| SNP information |                           |       |                     | Stage 1 (UKB)<br>(8068 cases, 40360 controls) |       |       |          | ACO (cases divided by age of asthma onset)             |       |       |          |                                                        |       |       |          | Smoking-stratified ACO GWAS                                      |       |       |          |                                                                 |       |       |          |
|-----------------|---------------------------|-------|---------------------|-----------------------------------------------|-------|-------|----------|--------------------------------------------------------|-------|-------|----------|--------------------------------------------------------|-------|-------|----------|------------------------------------------------------------------|-------|-------|----------|-----------------------------------------------------------------|-------|-------|----------|
| rsid            | chr:pos<br>(other/effect) | EAF   | gene                | OR                                            | LCI   | UCI   | P        | ACO (adult-onset asthma): 3755 cases vs 40360 controls |       |       |          | ACO (child-onset asthma): 2903 cases vs 40360 controls |       |       |          | ACO vs controls (all ever-smokers): 4367 cases vs 17216 controls |       |       |          | ACO vs controls (all never-smokers): 3701 cases, 23044 controls |       |       |          |
|                 |                           |       |                     |                                               |       |       |          | OR                                                     | LCI   | UCI   | P        | OR                                                     | LCI   | UCI   | P        | OR                                                               | LCI   | UCI   | P        | OR                                                              | LCI   | UCI   | P        |
| rs159960        | 1:8476428_A_G             | 0.559 | <i>RERE</i>         | 1.128                                         | 1.087 | 1.170 | 1.33E-10 | 1.144                                                  | 1.087 | 1.203 | 1.80E-07 | 1.124                                                  | 1.063 | 1.189 | 4.05E-05 | 1.110                                                            | 1.056 | 1.166 | 3.83E-05 | 1.152                                                           | 1.092 | 1.216 | 2.27E-07 |
| rs41301991      | 1:15287168_C_T            | 0.022 | <i>KAZN</i>         | 1.394                                         | 1.232 | 1.578 | 1.42E-07 | 1.401                                                  | 1.178 | 1.665 | 1.33E-04 | 1.655                                                  | 1.364 | 2.008 | 3.25E-07 | 1.404                                                            | 1.188 | 1.660 | 6.90E-05 | 1.369                                                           | 1.143 | 1.640 | 6.37E-04 |
| rs34290285      | 2:242698640_G_A           | 0.252 | <i>D2HGDH</i>       | 0.862                                         | 0.827 | 0.899 | 4.31E-12 | 0.912                                                  | 0.862 | 0.966 | 1.67E-03 | 0.843                                                  | 0.791 | 0.898 | 1.30E-07 | 0.880                                                            | 0.831 | 0.931 | 9.02E-06 | 0.841                                                           | 0.791 | 0.894 | 3.14E-08 |
| rs35570272      | 3:33047662_G_T            | 0.398 | <i>GLB1</i>         | 1.107                                         | 1.066 | 1.149 | 1.06E-07 | 1.089                                                  | 1.035 | 1.146 | 1.10E-03 | 1.108                                                  | 1.047 | 1.172 | 4.12E-04 | 1.068                                                            | 1.015 | 1.123 | 1.13E-02 | 1.160                                                           | 1.099 | 1.225 | 8.60E-08 |
| rs6787279       | 3:57163751_T_C            | 0.169 | <i>IL17RD</i>       | 0.880                                         | 0.838 | 0.924 | 2.69E-07 | 0.888                                                  | 0.831 | 0.949 | 4.75E-04 | 0.842                                                  | 0.783 | 0.907 | 5.03E-06 | 0.853                                                            | 0.799 | 0.911 | 2.31E-06 | 0.917                                                           | 0.854 | 0.985 | 1.69E-02 |
| rs62326355      | 4:120141978_A_G           | 0.017 | <i>USP53</i>        | 1.434                                         | 1.238 | 1.660 | 1.44E-06 | 1.516                                                  | 1.236 | 1.858 | 6.27E-05 | 1.267                                                  | 1.007 | 1.594 | 4.37E-02 | 1.627                                                            | 1.335 | 1.982 | 1.36E-06 | 1.265                                                           | 1.019 | 1.570 | 3.29E-02 |
| rs17720281*     | 4:145543776_C_T           | 0.429 | <i>HHIP-AS1</i>     | 1.088                                         | 1.050 | 1.127 | 3.77E-06 | 1.062                                                  | 1.010 | 1.116 | 1.87E-02 | 1.016                                                  | 0.962 | 1.074 | 5.62E-01 | 1.053                                                            | 1.003 | 1.107 | 3.94E-02 | 1.033                                                           | 0.979 | 1.089 | 2.38E-01 |
| rs16903574      | 5:14610309_C_G            | 0.077 | <i>FAM105A</i>      | 1.231                                         | 1.148 | 1.319 | 4.47E-09 | 1.188                                                  | 1.079 | 1.308 | 4.45E-04 | 1.310                                                  | 1.179 | 1.456 | 5.61E-07 | 1.201                                                            | 1.094 | 1.319 | 1.23E-04 | 1.268                                                           | 1.146 | 1.404 | 4.55E-06 |
| rs80101740      | 5:98471135_A_C            | 0.015 | <i>LOC100289230</i> | 1.443                                         | 1.241 | 1.678 | 1.87E-06 | 1.474                                                  | 1.196 | 1.815 | 2.66E-04 | 1.382                                                  | 1.092 | 1.749 | 7.12E-03 | 1.586                                                            | 1.299 | 1.935 | 5.64E-06 | 1.264                                                           | 1.009 | 1.585 | 4.17E-02 |
| rs1837253       | 5:110401872_T_C           | 0.739 | <i>TSLP</i>         | 1.222                                         | 1.172 | 1.274 | 4.22E-21 | 1.169                                                  | 1.105 | 1.238 | 6.68E-08 | 1.281                                                  | 1.203 | 1.364 | 1.12E-14 | 1.194                                                            | 1.129 | 1.263 | 6.38E-10 | 1.259                                                           | 1.185 | 1.338 | 1.02E-13 |
| rs3749833       | 5:131799626_T_C           | 0.263 | <i>C5orf56</i>      | 1.158                                         | 1.111 | 1.207 | 3.10E-12 | 1.124                                                  | 1.062 | 1.190 | 5.44E-05 | 1.221                                                  | 1.147 | 1.300 | 4.62E-10 | 1.156                                                            | 1.093 | 1.222 | 3.55E-07 | 1.166                                                           | 1.098 | 1.239 | 6.60E-07 |
| rs7383537       | 6:30074872_C_T            | 0.372 | <i>TRIM31-AS1</i>   | 0.893                                         | 0.859 | 0.928 | 6.96E-09 | 0.891                                                  | 0.845 | 0.939 | 1.47E-05 | 0.927                                                  | 0.875 | 0.983 | 1.07E-02 | 0.890                                                            | 0.845 | 0.937 | 8.84E-06 | 0.899                                                           | 0.850 | 0.951 | 2.23E-04 |
| rs9273410       | 6:32627250_C_A            | 0.445 | <i>HLA-DQB1</i>     | 1.237                                         | 1.190 | 1.286 | 4.37E-27 | 1.231                                                  | 1.168 | 1.299 | 1.72E-14 | 1.201                                                  | 1.132 | 1.273 | 9.37E-10 | 1.221                                                            | 1.159 | 1.287 | 8.61E-14 | 1.256                                                           | 1.187 | 1.328 | 2.14E-15 |
| rs115643887     | 6:109280933_G_T           | 0.123 | <i>ARMC2</i>        | 0.873                                         | 0.825 | 0.923 | 1.55E-06 | 0.886                                                  | 0.821 | 0.956 | 1.74E-03 | 0.851                                                  | 0.782 | 0.925 | 1.66E-04 | 0.851                                                            | 0.789 | 0.917 | 2.53E-05 | 0.899                                                           | 0.829 | 0.975 | 1.05E-02 |
| rs1339248       | 9:78625640_T_C            | 0.142 | <i>PCSK5</i>        | 1.135                                         | 1.078 | 1.196 | 1.85E-06 | 1.147                                                  | 1.068 | 1.232 | 1.76E-04 | 1.144                                                  | 1.056 | 1.239 | 9.41E-04 | 1.111                                                            | 1.036 | 1.193 | 3.24E-03 | 1.156                                                           | 1.071 | 1.247 | 2.06E-04 |
| rs1028655       | 9:101652106_A_G           | 0.620 | <i>GALNT12</i>      | 0.899                                         | 0.866 | 0.934 | 3.06E-08 | 0.885                                                  | 0.841 | 0.932 | 3.12E-06 | 0.904                                                  | 0.854 | 0.957 | 4.80E-04 | 0.912                                                            | 0.867 | 0.960 | 3.81E-04 | 0.886                                                           | 0.838 | 0.935 | 1.33E-05 |
| rs2076846       | 10:6063253_A_G            | 0.363 | <i>IL2RA</i>        | 1.105                                         | 1.064 | 1.148 | 2.57E-07 | 1.081                                                  | 1.026 | 1.139 | 3.33E-03 | 1.155                                                  | 1.090 | 1.224 | 1.03E-06 | 1.083                                                            | 1.029 | 1.141 | 2.26E-03 | 1.130                                                           | 1.069 | 1.194 | 1.56E-05 |
| rs2033149       | 10:60264741_A_T           | 0.437 | <i>BICC1</i>        | 1.093                                         | 1.053 | 1.134 | 2.44E-06 | 1.107                                                  | 1.052 | 1.164 | 9.16E-05 | 1.085                                                  | 1.026 | 1.148 | 4.21E-03 | 1.118                                                            | 1.064 | 1.175 | 1.19E-05 | 1.064                                                           | 1.008 | 1.123 | 2.42E-02 |

|            |                  |       |                  |       |       |       |          |       |       |       |          |       |       |       |          |       |       |       |          |       |       |       |          |
|------------|------------------|-------|------------------|-------|-------|-------|----------|-------|-------|-------|----------|-------|-------|-------|----------|-------|-------|-------|----------|-------|-------|-------|----------|
| rs55646091 | 11:76299431_G_A  | 0.051 | <i>C11orf30</i>  | 1.390 | 1.279 | 1.511 | 9.23E-15 | 1.188 | 1.058 | 1.334 | 3.66E-03 | 1.711 | 1.507 | 1.943 | 1.02E-16 | 1.348 | 1.204 | 1.509 | 2.12E-07 | 1.446 | 1.281 | 1.633 | 2.72E-09 |
| rs4936678  | 11:111625085_C_T | 0.255 | <i>PPP2R1B</i>   | 0.897 | 0.860 | 0.936 | 4.26E-07 | 0.903 | 0.852 | 0.956 | 4.61E-04 | 0.916 | 0.859 | 0.976 | 6.43E-03 | 0.893 | 0.843 | 0.945 | 9.69E-05 | 0.899 | 0.846 | 0.955 | 6.20E-04 |
| rs56136109 | 12:8211784_A_G   | 0.028 | <i>C3AR1</i>     | 0.772 | 0.691 | 0.862 | 4.07E-06 | 0.788 | 0.678 | 0.915 | 1.84E-03 | 0.787 | 0.669 | 0.927 | 4.15E-03 | 0.788 | 0.679 | 0.914 | 1.68E-03 | 0.759 | 0.646 | 0.892 | 8.42E-04 |
| rs7312770  | 12:56467587_C_T  | 0.495 | <i>ERBB3</i>     | 0.884 | 0.853 | 0.918 | 5.67E-11 | 0.911 | 0.867 | 0.958 | 2.82E-04 | 0.860 | 0.813 | 0.909 | 1.04E-07 | 0.904 | 0.860 | 0.950 | 6.52E-05 | 0.860 | 0.815 | 0.907 | 3.42E-08 |
| rs17241080 | 12:94619773_C_G  | 0.058 | <i>PLXNC1</i>    | 1.254 | 1.157 | 1.359 | 3.25E-08 | 1.228 | 1.099 | 1.373 | 2.98E-04 | 1.206 | 1.067 | 1.364 | 2.82E-03 | 1.258 | 1.126 | 1.405 | 4.89E-05 | 1.238 | 1.104 | 1.389 | 2.67E-04 |
| rs7995004  | 13:44478820_C_T  | 0.209 | <i>LACC1</i>     | 1.118 | 1.069 | 1.169 | 1.16E-06 | 1.106 | 1.040 | 1.176 | 1.32E-03 | 1.127 | 1.053 | 1.207 | 5.92E-04 | 1.139 | 1.073 | 1.210 | 2.33E-05 | 1.096 | 1.026 | 1.170 | 6.42E-03 |
| rs9513600  | 13:99996015_G_A  | 0.716 | <i>MIR548AN</i>  | 1.123 | 1.079 | 1.170 | 1.63E-08 | 1.082 | 1.024 | 1.144 | 4.81E-03 | 1.163 | 1.094 | 1.237 | 1.36E-06 | 1.070 | 1.013 | 1.129 | 1.45E-02 | 1.188 | 1.120 | 1.261 | 1.37E-08 |
| rs2180369  | 14:93516465_T_C  | 0.113 | <i>ITPK1</i>     | 1.170 | 1.105 | 1.239 | 7.68E-08 | 1.173 | 1.084 | 1.269 | 6.80E-05 | 1.193 | 1.093 | 1.303 | 8.17E-05 | 1.183 | 1.095 | 1.279 | 1.96E-05 | 1.155 | 1.062 | 1.256 | 7.35E-04 |
| rs11814094 | 14:103650919_A_G | 0.033 | <i>LINC00605</i> | 0.785 | 0.710 | 0.869 | 2.91E-06 | 0.820 | 0.716 | 0.940 | 4.28E-03 | 0.765 | 0.658 | 0.889 | 4.84E-04 | 0.758 | 0.660 | 0.870 | 8.17E-05 | 0.814 | 0.703 | 0.943 | 6.05E-03 |
| rs1031460  | 17:38072247_T_G  | 0.504 | <i>GSDMB</i>     | 1.155 | 1.113 | 1.197 | 9.96E-15 | 1.085 | 1.032 | 1.140 | 1.40E-03 | 1.282 | 1.213 | 1.354 | 1.11E-18 | 1.121 | 1.068 | 1.178 | 4.89E-06 | 1.194 | 1.132 | 1.259 | 7.71E-11 |
| rs1029792  | 17:38808941_G_T  | 0.694 | <i>KRT222</i>    | 1.098 | 1.055 | 1.143 | 3.67E-06 | 1.024 | 0.970 | 1.081 | 3.89E-01 | 1.145 | 1.078 | 1.216 | 1.09E-05 | 1.084 | 1.027 | 1.143 | 3.47E-03 | 1.119 | 1.056 | 1.185 | 1.40E-04 |
| rs2584662  | 17:47470487_A_C  | 0.420 | <i>PHB</i>       | 0.901 | 0.868 | 0.935 | 3.20E-08 | 0.900 | 0.855 | 0.946 | 4.30E-05 | 0.881 | 0.833 | 0.932 | 1.01E-05 | 0.919 | 0.874 | 0.966 | 9.25E-04 | 0.881 | 0.835 | 0.930 | 4.36E-06 |
| rs4804461  | 19:9959556_C_T   | 0.249 | <i>PIN1</i>      | 0.902 | 0.865 | 0.941 | 1.73E-06 | 0.904 | 0.853 | 0.958 | 6.55E-04 | 0.886 | 0.831 | 0.945 | 2.08E-04 | 0.921 | 0.870 | 0.975 | 4.89E-03 | 0.881 | 0.828 | 0.937 | 5.76E-05 |

**e-Table 8: 99% credible sets for eight signals followed up in downstream analyses, with gene annotations**

Bold SNPs had exonic or UTR annotation and were taken forward for variant effect prediction analysis; postprob=posterior probability

| sentinel         | SNP               | BP                | A1       | A2       | A1 freq      | Beta          | SE           | P               | postprob     | location      | gene                  | distance             | NSNPs in credible set |
|------------------|-------------------|-------------------|----------|----------|--------------|---------------|--------------|-----------------|--------------|---------------|-----------------------|----------------------|-----------------------|
| rs35570272       | rs7631407         | 3:33036218        | C        | G        | 0.293        | 0.091         | 0.021        | 9.27E-06        | 0.008        | intergenic    | <i>CCR4;GLB1</i>      | dist=39815;dist=1882 |                       |
| rs35570272       | rs9828592         | 3:33044339        | C        | T        | 0.531        | 0.086         | 0.018        | 3.43E-06        | 0.018        | intronic      | <i>GLB1</i>           |                      |                       |
| rs35570272       | rs7646283         | 3:33046480        | T        | C        | 0.368        | 0.097         | 0.019        | 4.40E-07        | 0.133        | intronic      | <i>GLB1</i>           |                      |                       |
| rs35570272       | rs34064757        | 3:33047283        | A        | G        | 0.368        | 0.097         | 0.019        | 4.61E-07        | 0.127        | intronic      | <i>GLB1</i>           |                      |                       |
| rs35570272       | rs35570272        | 3:33047662        | T        | G        | 0.398        | 0.101         | 0.019        | 8.20E-08        | 0.655        | intronic      | <i>GLB1</i>           |                      |                       |
| rs35570272       | rs73057087        | 3:33068268        | G        | A        | 0.381        | 0.081         | 0.019        | 1.98E-05        | 0.004        | intronic      | <i>GLB1</i>           |                      |                       |
| rs35570272       | rs4547648         | 3:33080256        | G        | A        | 0.380        | 0.081         | 0.019        | 1.94E-05        | 0.004        | intronic      | <i>GLB1</i>           |                      |                       |
| rs35570272       | rs4277638         | 3:33080356        | A        | G        | 0.380        | 0.082         | 0.019        | 1.77E-05        | 0.004        | intronic      | <i>GLB1</i>           |                      |                       |
| rs35570272       | rs4274702         | 3:33080722        | T        | C        | 0.380        | 0.082         | 0.019        | 1.72E-05        | 0.004        | intronic      | <i>GLB1</i>           |                      |                       |
| rs35570272       | rs6800001         | 3:33081102        | A        | G        | 0.380        | 0.082         | 0.019        | 1.71E-05        | 0.004        | intronic      | <i>GLB1</i>           |                      |                       |
| rs35570272       | rs28752078        | 3:33084861        | T        | C        | 0.411        | 0.090         | 0.019        | 1.81E-06        | 0.034        | intronic      | <i>GLB1</i>           |                      | 11                    |
| rs6787279        | rs74932439        | 3:57115567        | T        | C        | 0.162        | -0.119        | 0.025        | 1.90E-06        | 0.015        | intergenic    | <i>ARHGEF3;IL17RD</i> | dist=2231;dist=8443  |                       |
| rs6787279        | rs74999629        | 3:57117542        | A        | G        | 0.161        | -0.118        | 0.025        | 2.33E-06        | 0.013        | intergenic    | <i>ARHGEF3;IL17RD</i> | dist=4206;dist=6468  |                       |
| rs6787279        | rs59527464        | 3:57122780        | T        | C        | 0.198        | -0.118        | 0.023        | 3.67E-07        | 0.070        | intergenic    | <i>ARHGEF3;IL17RD</i> | dist=9444;dist=1230  |                       |
| <b>rs6787279</b> | <b>rs2035656</b>  | <b>3:57125101</b> | <b>C</b> | <b>A</b> | <b>0.161</b> | <b>-0.119</b> | <b>0.025</b> | <b>1.82E-06</b> | <b>0.016</b> | <b>UTR3</b>   | <b>IL17RD</b>         |                      |                       |
| <b>rs6787279</b> | <b>rs2035655</b>  | <b>3:57125202</b> | <b>G</b> | <b>T</b> | <b>0.198</b> | <b>-0.118</b> | <b>0.023</b> | <b>3.37E-07</b> | <b>0.075</b> | <b>UTR3</b>   | <b>IL17RD</b>         |                      |                       |
| <b>rs6787279</b> | <b>rs17289035</b> | <b>3:57125424</b> | <b>A</b> | <b>G</b> | <b>0.198</b> | <b>-0.118</b> | <b>0.023</b> | <b>3.37E-07</b> | <b>0.075</b> | <b>UTR3</b>   | <b>IL17RD</b>         |                      |                       |
| <b>rs6787279</b> | <b>rs12486855</b> | <b>3:57125864</b> | <b>G</b> | <b>A</b> | <b>0.161</b> | <b>-0.118</b> | <b>0.025</b> | <b>2.48E-06</b> | <b>0.012</b> | <b>UTR3</b>   | <b>IL17RD</b>         |                      |                       |
| <b>rs6787279</b> | <b>rs17057718</b> | <b>3:57136585</b> | <b>T</b> | <b>C</b> | <b>0.161</b> | <b>-0.117</b> | <b>0.025</b> | <b>2.51E-06</b> | <b>0.012</b> | <b>exonic</b> | <b>IL17RD</b>         |                      |                       |
| rs6787279        | rs1075398         | 3:57137596        | C        | A        | 0.161        | -0.118        | 0.025        | 2.32E-06        | 0.013        | intronic      | <i>IL17RD</i>         |                      |                       |
| rs6787279        | rs1077034         | 3:57138228        | A        | T        | 0.161        | -0.118        | 0.025        | 2.25E-06        | 0.013        | intronic      | <i>IL17RD</i>         |                      |                       |
| rs6787279        | rs76645245        | 3:57140794        | G        | A        | 0.161        | -0.118        | 0.025        | 2.11E-06        | 0.014        | intronic      | <i>IL17RD</i>         |                      |                       |
| rs6787279        | rs78345417        | 3:57143942        | T        | C        | 0.161        | -0.119        | 0.025        | 1.97E-06        | 0.015        | intronic      | <i>IL17RD</i>         |                      |                       |
| rs6787279        | rs79932559        | 3:57145726        | T        | C        | 0.161        | -0.119        | 0.025        | 2.00E-06        | 0.015        | intronic      | <i>IL17RD</i>         |                      |                       |
| rs6787279        | rs77543785        | 3:57148271        | T        | C        | 0.161        | -0.119        | 0.025        | 2.01E-06        | 0.015        | intronic      | <i>IL17RD</i>         |                      |                       |
| rs6787279        | rs6792236         | 3:57149315        | G        | T        | 0.161        | -0.119        | 0.025        | 1.98E-06        | 0.015        | intronic      | <i>IL17RD</i>         |                      |                       |
| rs6787279        | rs80095764        | 3:57149793        | T        | C        | 0.161        | -0.119        | 0.025        | 1.95E-06        | 0.015        | intronic      | <i>IL17RD</i>         |                      |                       |
| rs6787279        | rs1488123         | 3:57151812        | A        | G        | 0.161        | -0.119        | 0.025        | 1.98E-06        | 0.015        | intronic      | <i>IL17RD</i>         |                      |                       |
| rs6787279        | rs1386832         | 3:57152006        | G        | A        | 0.161        | -0.119        | 0.025        | 1.99E-06        | 0.015        | intronic      | <i>IL17RD</i>         |                      |                       |
| rs6787279        | rs1386833         | 3:57152041        | T        | C        | 0.162        | -0.115        | 0.025        | 3.92E-06        | 0.008        | intronic      | <i>IL17RD</i>         |                      |                       |
| rs6787279        | rs747089          | 3:57153869        | T        | C        | 0.161        | -0.119        | 0.025        | 1.90E-06        | 0.015        | intronic      | <i>IL17RD</i>         |                      |                       |
| rs6787279        | rs1872942         | 3:57154878        | T        | C        | 0.161        | -0.119        | 0.025        | 1.93E-06        | 0.015        | intronic      | <i>IL17RD</i>         |                      |                       |
| rs6787279        | rs111888204       | 3:57157978        | T        | C        | 0.161        | -0.117        | 0.025        | 2.77E-06        | 0.011        | intronic      | <i>IL17RD</i>         |                      |                       |
| rs6787279        | rs6768368         | 3:57162476        | T        | C        | 0.137        | -0.116        | 0.027        | 1.49E-05        | 0.002        | intronic      | <i>IL17RD</i>         |                      |                       |
| rs6787279        | rs6787279         | 3:57163751        | C        | T        | 0.169        | -0.128        | 0.025        | 2.11E-07        | 0.123        | intronic      | <i>IL17RD</i>         |                      |                       |
| rs6787279        | rs6772089         | 3:57163765        | T        | C        | 0.137        | -0.116        | 0.027        | 1.41E-05        | 0.002        | intronic      | <i>IL17RD</i>         |                      |                       |
| rs6787279        | rs6796041         | 3:57163887        | T        | G        | 0.137        | -0.118        | 0.027        | 1.00E-05        | 0.003        | intronic      | <i>IL17RD</i>         |                      |                       |
| rs6787279        | rs6775080         | 3:57164362        | T        | C        | 0.137        | -0.116        | 0.027        | 1.48E-05        | 0.002        | intronic      | <i>IL17RD</i>         |                      |                       |

|                   |                   |                   |          |          |              |              |              |                 |              |                |                        |                         |
|-------------------|-------------------|-------------------|----------|----------|--------------|--------------|--------------|-----------------|--------------|----------------|------------------------|-------------------------|
| rs6787279         | rs6787775         | 3:57164408        | T        | A        | 0.137        | -0.116       | 0.027        | 1.49E-05        | 0.002        | intronic       | IL17RD                 |                         |
| rs6787279         | rs34313207        | 3:57164929        | A        | G        | 0.137        | -0.118       | 0.027        | 9.89E-06        | 0.003        | intronic       | IL17RD                 |                         |
| rs6787279         | rs4681957         | 3:57165310        | A        | C        | 0.137        | -0.116       | 0.027        | 1.47E-05        | 0.002        | intronic       | IL17RD                 |                         |
| rs6787279         | rs6803905         | 3:57168273        | C        | T        | 0.169        | -0.127       | 0.025        | 2.31E-07        | 0.112        | intronic       | IL17RD                 |                         |
| rs6787279         | rs6788981         | 3:57168341        | T        | C        | 0.137        | -0.118       | 0.027        | 1.00E-05        | 0.003        | intronic       | IL17RD                 |                         |
| rs6787279         | rs56164953        | 3:57168793        | A        | G        | 0.137        | -0.118       | 0.027        | 9.95E-06        | 0.003        | intronic       | IL17RD                 |                         |
| rs6787279         | rs6807593         | 3:57169648        | C        | T        | 0.137        | -0.116       | 0.027        | 1.55E-05        | 0.002        | intronic       | IL17RD                 |                         |
| rs6787279         | rs1488121         | 3:57170495        | C        | G        | 0.137        | -0.118       | 0.027        | 9.75E-06        | 0.003        | intronic       | IL17RD                 |                         |
| rs6787279         | rs6774301         | 3:57171554        | C        | G        | 0.137        | -0.116       | 0.027        | 1.55E-05        | 0.002        | intronic       | IL17RD                 |                         |
| rs6787279         | rs6445858         | 3:57171902        | C        | T        | 0.137        | -0.118       | 0.027        | 9.98E-06        | 0.003        | intronic       | IL17RD                 |                         |
| rs6787279         | rs79625814        | 3:57173021        | T        | A        | 0.137        | -0.118       | 0.027        | 9.75E-06        | 0.003        | intronic       | IL17RD                 |                         |
| rs6787279         | rs1906504         | 3:57175454        | G        | A        | 0.137        | -0.116       | 0.027        | 1.47E-05        | 0.002        | intronic       | IL17RD                 |                         |
| rs6787279         | rs1386828         | 3:57176197        | A        | G        | 0.137        | -0.118       | 0.027        | 9.84E-06        | 0.003        | intronic       | IL17RD                 |                         |
| rs6787279         | rs1386829         | 3:57176505        | G        | A        | 0.137        | -0.118       | 0.027        | 9.81E-06        | 0.003        | intronic       | IL17RD                 |                         |
| rs6787279         | rs12496376        | 3:57177171        | G        | A        | 0.137        | -0.116       | 0.027        | 1.50E-05        | 0.002        | intronic       | IL17RD                 |                         |
| rs6787279         | rs6801574         | 3:57177195        | T        | C        | 0.169        | -0.127       | 0.025        | 2.41E-07        | 0.108        | intronic       | IL17RD                 |                         |
| rs6787279         | rs76208275        | 3:57177716        | C        | T        | 0.137        | -0.116       | 0.027        | 1.51E-05        | 0.002        | intronic       | IL17RD                 |                         |
| rs6787279         | rs12494525        | 3:57178293        | T        | C        | 0.137        | -0.115       | 0.027        | 1.66E-05        | 0.002        | intronic       | IL17RD                 |                         |
| rs6787279         | rs6808185         | 3:57179261        | G        | C        | 0.137        | -0.118       | 0.027        | 1.02E-05        | 0.003        | intronic       | IL17RD                 |                         |
| rs6787279         | rs17057784        | 3:57180402        | A        | C        | 0.138        | -0.118       | 0.027        | 9.37E-06        | 0.004        | intronic       | IL17RD                 |                         |
| rs6787279         | rs9823843         | 3:57181631        | C        | T        | 0.137        | -0.118       | 0.027        | 1.01E-05        | 0.003        | intronic       | IL17RD                 |                         |
| rs6787279         | rs17216900        | 3:57183877        | C        | T        | 0.170        | -0.122       | 0.025        | 6.90E-07        | 0.040        | intronic       | IL17RD                 |                         |
| rs6787279         | rs4475007         | 3:57186159        | G        | A        | 0.232        | -0.096       | 0.022        | 1.25E-05        | 0.002        | intronic       | IL17RD                 |                         |
| rs6787279         | rs3968279         | 3:57187078        | C        | T        | 0.120        | -0.134       | 0.028        | 2.66E-06        | 0.012        | intronic       | IL17RD                 |                         |
| rs6787279         | rs9823220         | 3:57190211        | T        | G        | 0.119        | -0.135       | 0.029        | 2.16E-06        | 0.015        | intronic       | IL17RD                 |                         |
| rs6787279         | rs7431253         | 3:57190452        | G        | A        | 0.119        | -0.133       | 0.028        | 3.23E-06        | 0.010        | intronic       | IL17RD                 |                         |
| rs6787279         | rs35424480        | 3:57190811        | C        | G        | 0.120        | -0.133       | 0.028        | 2.86E-06        | 0.011        | intronic       | IL17RD                 |                         |
| rs6787279         | rs1906505         | 3:57194272        | T        | C        | 0.119        | -0.134       | 0.029        | 2.75E-06        | 0.012        | intronic       | IL17RD                 | 55                      |
| <b>rs16903574</b> | <b>rs16903574</b> | <b>5:14610309</b> | <b>G</b> | <b>C</b> | <b>0.077</b> | <b>0.208</b> | <b>0.035</b> | <b>3.27E-09</b> | <b>0.999</b> | <b>exonic</b>  | <b>FAM105A</b>         | <b>1</b>                |
| rs80101740        | rs80101740        | 5:98471135        | C        | A        | 0.015        | 0.367        | 0.076        | 1.52E-06        | 0.774        | intergenic     | LOC100289230;LINCO2113 | dist=204422;dist=398559 |
| rs80101740        | rs138827081       | 5:98511774        | A        | G        | 0.013        | 0.347        | 0.083        | 2.61E-05        | 0.065        | intergenic     | LOC100289230;LINCO2113 | dist=245061;dist=357920 |
| rs80101740        | rs183720747       | 5:98516580        | G        | T        | 0.013        | 0.350        | 0.083        | 2.20E-05        | 0.075        | intergenic     | LOC100289230;LINCO2113 | dist=249867;dist=353114 |
| rs80101740        | rs144009750       | 5:98530592        | T        | C        | 0.013        | 0.334        | 0.082        | 4.30E-05        | 0.044        | intergenic     | LOC100289230;LINCO2113 | dist=263879;dist=339102 |
| rs80101740        | rs149035101       | 5:98534794        | G        | A        | 0.013        | 0.333        | 0.082        | 4.65E-05        | 0.041        | intergenic     | LOC100289230;LINCO2113 | dist=268081;dist=334900 |
| rs1837253         | rs1837253         | 5:110401872       | C        | T        | 0.739        | 0.200        | 0.021        | 1.91E-21        | 1.000        | intergenic     | SLC25A46;TSLP          | dist=300998;dist=5518   |
| rs3749833         | rs59041913        | 5:131788135       | T        | C        | 0.232        | 0.137        | 0.022        | 3.51E-10        | 0.002        | ncRNA_intronic | C5orf56                |                         |
| rs3749833         | rs7713065         | 5:131788334       | C        | A        | 0.737        | -0.146       | 0.021        | 3.01E-12        | 0.199        | ncRNA_intronic | C5orf56                |                         |
| rs3749833         | rs10069798        | 5:131788421       | A        | T        | 0.232        | 0.136        | 0.022        | 4.10E-10        | 0.002        | ncRNA_intronic | C5orf56                |                         |
| rs3749833         | rs1023518         | 5:131793772       | T        | G        | 0.263        | 0.145        | 0.021        | 4.49E-12        | 0.135        | ncRNA_intronic | C5orf56                |                         |

|                  |                  |                   |          |          |              |              |              |                 |              |                |                  |                       |
|------------------|------------------|-------------------|----------|----------|--------------|--------------|--------------|-----------------|--------------|----------------|------------------|-----------------------|
| rs3749833        | rs3857440        | 5:131794069       | A        | G        | 0.263        | 0.145        | 0.021        | 3.73E-12        | 0.161        | ncRNA_intronic | C5orf56          |                       |
| rs3749833        | rs3749833        | 5:131799626       | C        | T        | 0.263        | 0.147        | 0.021        | 2.00E-12        | 0.295        | ncRNA_intronic | C5orf56          |                       |
| rs3749833        | rs11748326       | 5:131799959       | T        | C        | 0.237        | 0.140        | 0.022        | 8.39E-11        | 0.008        | ncRNA_intronic | C5orf56          |                       |
| rs3749833        | rs10077785       | 5:131801158       | T        | C        | 0.237        | 0.140        | 0.022        | 9.28E-11        | 0.007        | ncRNA_intronic | C5orf56          |                       |
| rs3749833        | rs10067603       | 5:131803868       | G        | A        | 0.232        | 0.139        | 0.022        | 1.60E-10        | 0.004        | ncRNA_intronic | C5orf56          |                       |
| rs3749833        | rs10060626       | 5:131803967       | G        | T        | 0.240        | 0.139        | 0.022        | 1.49E-10        | 0.005        | ncRNA_intronic | C5orf56          |                       |
| rs3749833        | rs10039559       | 5:131804507       | C        | T        | 0.232        | 0.139        | 0.022        | 1.67E-10        | 0.004        | ncRNA_intronic | C5orf56          |                       |
| rs3749833        | rs3846729        | 5:131806768       | C        | G        | 0.232        | 0.139        | 0.022        | 1.49E-10        | 0.005        | ncRNA_intronic | C5orf56          |                       |
| rs3749833        | rs2548993        | 5:131808869       | A        | G        | 0.722        | -0.138       | 0.021        | 2.24E-11        | 0.028        | ncRNA_intronic | C5orf56          |                       |
| rs3749833        | rs2057656        | 5:131809305       | C        | T        | 0.732        | -0.144       | 0.021        | 4.51E-12        | 0.134        | ncRNA_intronic | C5orf56          |                       |
| rs3749833        | rs2057657        | 5:131809316       | G        | A        | 0.232        | 0.138        | 0.022        | 2.26E-10        | 0.003        | ncRNA_intronic | C5orf56          | 15                    |
| <b>rs9273410</b> | <b>rs9273410</b> | <b>6:32627250</b> | <b>A</b> | <b>C</b> | <b>0.445</b> | <b>0.213</b> | <b>0.020</b> | <b>1.55E-27</b> | <b>0.999</b> | <b>UTR3</b>    | <b>HLA-DQB1</b>  | <b>1</b>              |
| rs2584662        | rs2671654        | 17:47468011       | G        | A        | 0.420        | -0.104       | 0.019        | 2.84E-08        | 0.146        | intergenic     | LOC102724596;PHB | dist=10555;dist=13399 |
| rs2584662        | rs2584663        | 17:47468147       | A        | G        | 0.351        | -0.105       | 0.019        | 5.55E-08        | 0.078        | intergenic     | LOC102724596;PHB | dist=10691;dist=13263 |
| rs2584662        | rs2412099        | 17:47469186       | A        | G        | 0.420        | -0.104       | 0.019        | 2.74E-08        | 0.151        | intergenic     | LOC102724596;PHB | dist=11730;dist=12224 |
| rs2584662        | rs9916130        | 17:47469229       | G        | C        | 0.352        | -0.105       | 0.019        | 5.66E-08        | 0.077        | intergenic     | LOC102724596;PHB | dist=11773;dist=12181 |
| rs2584662        | rs2584662        | 17:47470487       | C        | A        | 0.420        | -0.104       | 0.019        | 2.42E-08        | 0.170        | intergenic     | LOC102724596;PHB | dist=13031;dist=10923 |
| rs2584662        | rs2584661        | 17:47470534       | A        | G        | 0.347        | -0.108       | 0.019        | 3.09E-08        | 0.138        | intergenic     | LOC102724596;PHB | dist=13078;dist=10876 |
| rs2584662        | rs2671657        | 17:47473616       | A        | G        | 0.420        | -0.103       | 0.019        | 3.38E-08        | 0.123        | intergenic     | LOC102724596;PHB | dist=16160;dist=7794  |
| rs2584662        | rs2671659        | 17:47474529       | A        | G        | 0.347        | -0.107       | 0.019        | 3.66E-08        | 0.117        | intergenic     | LOC102724596;PHB | dist=17073;dist=6881  |



**e-Table 9: Results of eQTL analysis for SNPs in 99% credible set at 5% FDR level**

eqtl\_p=p-value in eQTL analysis; eqtl\_coded=coded allele in eQTL analysis; expr\_sign\_eqtl\_coded=expression in terms of eQTL coded allele (+=increased, -=decreased); expr\_sign\_A1 (expression change in terms of A1 (+=increased, -=decreased))

| sentinel   | SNP        | CHR | BP       | A1 | A2 | A1FRE<br>Q | BETA   | SE    | P        | postpr<br>ob | tissue    | gene   | eqtl_p   | eqtl_c<br>oded | expr_sign_<br>eqtl_coded | expr_sign_<br>A1 |
|------------|------------|-----|----------|----|----|------------|--------|-------|----------|--------------|-----------|--------|----------|----------------|--------------------------|------------------|
| rs35570272 | rs7646283  | 3   | 33046480 | T  | C  | 0.368      | 0.097  | 0.019 | 4.40E-07 | 0.133        | Lung      | CRTAP  | 0.000455 | C              | +                        | -                |
| rs35570272 | rs34064757 | 3   | 33047283 | A  | G  | 0.368      | 0.097  | 0.019 | 4.61E-07 | 0.127        | Lung      | CRTAP  | 0.000455 | G              | +                        | -                |
| rs6787279  | rs74999629 | 3   | 57117542 | A  | G  | 0.161      | -0.118 | 0.025 | 2.33E-06 | 0.013        | GTEx_lung | IL17RD | 2.27E-09 | A              | +                        | +                |
| rs6787279  | rs74932439 | 3   | 57115567 | T  | C  | 0.162      | -0.119 | 0.025 | 1.90E-06 | 0.015        | GTEx_lung | IL17RD | 3.15E-09 | T              | +                        | +                |
| rs6787279  | rs59527464 | 3   | 57122780 | T  | C  | 0.198      | -0.118 | 0.023 | 3.67E-07 | 0.070        | GTEx_lung | IL17RD | 1.44E-08 | T              | +                        | +                |
| rs6787279  | rs59527464 | 3   | 57122780 | T  | C  | 0.198      | -0.118 | 0.023 | 3.67E-07 | 0.070        | Lung      | IL17RD | 1.40E-05 | C              | -                        | +                |
| rs6787279  | rs74932439 | 3   | 57115567 | T  | C  | 0.162      | -0.119 | 0.025 | 1.90E-06 | 0.015        | Lung      | IL17RD | 1.95E-04 | C              | -                        | +                |
| rs6787279  | rs74999629 | 3   | 57117542 | A  | G  | 0.161      | -0.118 | 0.025 | 2.33E-06 | 0.013        | Lung      | IL17RD | 0.000195 | G              | -                        | +                |
| rs6787279  | rs12486855 | 3   | 57125864 | G  | A  | 0.161      | -0.118 | 0.025 | 2.48E-06 | 0.012        | GTEx_lung | IL17RD | 3.11E-09 | G              | +                        | +                |
| rs6787279  | rs2035655  | 3   | 57125202 | G  | T  | 0.198      | -0.118 | 0.023 | 3.37E-07 | 0.075        | GTEx_lung | IL17RD | 1.29E-08 | G              | +                        | +                |
| rs6787279  | rs17289035 | 3   | 57125424 | A  | G  | 0.198      | -0.118 | 0.023 | 3.37E-07 | 0.075        | GTEx_lung | IL17RD | 1.29E-08 | A              | +                        | +                |
| rs6787279  | rs2035656  | 3   | 57125101 | C  | A  | 0.161      | -0.119 | 0.025 | 1.82E-06 | 0.016        | GTEx_lung | IL17RD | 1.39E-08 | C              | +                        | +                |
| rs6787279  | rs2035655  | 3   | 57125202 | G  | T  | 0.198      | -0.118 | 0.023 | 3.37E-07 | 0.075        | Lung      | IL17RD | 1.40E-05 | T              | -                        | +                |
| rs6787279  | rs17289035 | 3   | 57125424 | A  | G  | 0.198      | -0.118 | 0.023 | 3.37E-07 | 0.075        | Lung      | IL17RD | 1.40E-05 | G              | -                        | +                |
| rs6787279  | rs2035656  | 3   | 57125101 | C  | A  | 0.161      | -0.119 | 0.025 | 1.82E-06 | 0.016        | Lung      | IL17RD | 1.95E-04 | A              | -                        | +                |
| rs6787279  | rs12486855 | 3   | 57125864 | G  | A  | 0.161      | -0.118 | 0.025 | 2.48E-06 | 0.012        | Lung      | IL17RD | 0.000195 | A              | -                        | +                |
| rs6787279  | rs17057718 | 3   | 57136585 | T  | C  | 0.161      | -0.117 | 0.025 | 2.51E-06 | 0.012        | GTEx_lung | IL17RD | 4.63E-09 | T              | +                        | +                |
| rs6787279  | rs1075398  | 3   | 57137596 | C  | A  | 0.161      | -0.118 | 0.025 | 2.32E-06 | 0.013        | GTEx_lung | IL17RD | 4.63E-09 | C              | +                        | +                |
| rs6787279  | rs1077034  | 3   | 57138228 | A  | T  | 0.161      | -0.118 | 0.025 | 2.25E-06 | 0.013        | GTEx_lung | IL17RD | 4.63E-09 | A              | +                        | +                |
| rs6787279  | rs76645245 | 3   | 57140794 | G  | A  | 0.161      | -0.118 | 0.025 | 2.11E-06 | 0.014        | GTEx_lung | IL17RD | 4.63E-09 | G              | +                        | +                |
| rs6787279  | rs78345417 | 3   | 57143942 | T  | C  | 0.161      | -0.119 | 0.025 | 1.97E-06 | 0.015        | GTEx_lung | IL17RD | 1.70E-08 | T              | +                        | +                |
| rs6787279  | rs1077034  | 3   | 57138228 | A  | T  | 0.161      | -0.118 | 0.025 | 2.25E-06 | 0.013        | Lung      | IL17RD | 9.37E-05 | T              | -                        | +                |
| rs6787279  | rs76645245 | 3   | 57140794 | G  | A  | 0.161      | -0.118 | 0.025 | 2.11E-06 | 0.014        | Lung      | IL17RD | 9.37E-05 | A              | -                        | +                |
| rs6787279  | rs78345417 | 3   | 57143942 | T  | C  | 0.161      | -0.119 | 0.025 | 1.97E-06 | 0.015        | Lung      | IL17RD | 9.37E-05 | C              | -                        | +                |
| rs6787279  | rs17057718 | 3   | 57136585 | T  | C  | 0.161      | -0.117 | 0.025 | 2.51E-06 | 0.012        | Lung      | IL17RD | 1.38E-04 | C              | -                        | +                |
| rs6787279  | rs1075398  | 3   | 57137596 | C  | A  | 0.161      | -0.118 | 0.025 | 2.32E-06 | 0.013        | Lung      | IL17RD | 0.000138 | A              | -                        | +                |
| rs6787279  | rs79932559 | 3   | 57145726 | T  | C  | 0.161      | -0.119 | 0.025 | 2.00E-06 | 0.015        | GTEx_lung | IL17RD | 4.63E-09 | T              | +                        | +                |
| rs6787279  | rs1488123  | 3   | 57151812 | A  | G  | 0.161      | -0.119 | 0.025 | 1.98E-06 | 0.015        | GTEx_lung | IL17RD | 4.63E-09 | A              | +                        | +                |
| rs6787279  | rs1386832  | 3   | 57152006 | G  | A  | 0.161      | -0.119 | 0.025 | 1.99E-06 | 0.015        | GTEx_lung | IL17RD | 4.63E-09 | G              | +                        | +                |
| rs6787279  | rs1386833  | 3   | 57152041 | T  | C  | 0.162      | -0.115 | 0.025 | 3.92E-06 | 0.008        | GTEx_lung | IL17RD | 4.63E-09 | T              | +                        | +                |
| rs6787279  | rs747089   | 3   | 57153869 | T  | C  | 0.161      | -0.119 | 0.025 | 1.90E-06 | 0.015        | GTEx_lung | IL17RD | 4.63E-09 | T              | +                        | +                |
| rs6787279  | rs1872942  | 3   | 57154878 | T  | C  | 0.161      | -0.119 | 0.025 | 1.93E-06 | 0.015        | GTEx_lung | IL17RD | 4.63E-09 | T              | +                        | +                |
| rs6787279  | rs77543785 | 3   | 57148271 | T  | C  | 0.161      | -0.119 | 0.025 | 2.01E-06 | 0.015        | GTEx_lung | IL17RD | 3.95E-08 | T              | +                        | +                |
| rs6787279  | rs6792236  | 3   | 57149315 | G  | T  | 0.161      | -0.119 | 0.025 | 1.98E-06 | 0.015        | GTEx_lung | IL17RD | 3.95E-08 | G              | +                        | +                |
| rs6787279  | rs80095764 | 3   | 57149793 | T  | C  | 0.161      | -0.119 | 0.025 | 1.95E-06 | 0.015        | GTEx_lung | IL17RD | 3.95E-08 | T              | +                        | +                |
| rs6787279  | rs79932559 | 3   | 57145726 | T  | C  | 0.161      | -0.119 | 0.025 | 2.00E-06 | 0.015        | Lung      | IL17RD | 9.37E-05 | C              | -                        | +                |

| sentinel  | SNP        | CHR | BP       | A1 | A2 | A1FRE<br>Q | BETA   | SE    | P        | postpr<br>ob | tissue    | gene   | eqtl_p   | eqtl_c<br>oded | expr_sign_<br>eqtl_coded | expr_sign_<br>A1 |
|-----------|------------|-----|----------|----|----|------------|--------|-------|----------|--------------|-----------|--------|----------|----------------|--------------------------|------------------|
| rs6787279 | rs77543785 | 3   | 57148271 | T  | C  | 0.161      | -0.119 | 0.025 | 2.01E-06 | 0.015        | Lung      | IL17RD | 9.37E-05 | C              | -                        | +                |
| rs6787279 | rs80095764 | 3   | 57149793 | T  | C  | 0.161      | -0.119 | 0.025 | 1.95E-06 | 0.015        | Lung      | IL17RD | 9.37E-05 | C              | -                        | +                |
| rs6787279 | rs1488123  | 3   | 57151812 | A  | G  | 0.161      | -0.119 | 0.025 | 1.98E-06 | 0.015        | Lung      | IL17RD | 9.37E-05 | G              | -                        | +                |
| rs6787279 | rs1386832  | 3   | 57152006 | G  | A  | 0.161      | -0.119 | 0.025 | 1.99E-06 | 0.015        | Lung      | IL17RD | 9.37E-05 | A              | -                        | +                |
| rs6787279 | rs1386833  | 3   | 57152041 | T  | C  | 0.162      | -0.115 | 0.025 | 3.92E-06 | 0.008        | Lung      | IL17RD | 9.37E-05 | C              | -                        | +                |
| rs6787279 | rs747089   | 3   | 57153869 | T  | C  | 0.161      | -0.119 | 0.025 | 1.90E-06 | 0.015        | Lung      | IL17RD | 9.37E-05 | C              | -                        | +                |
| rs6787279 | rs6792236  | 3   | 57149315 | G  | T  | 0.161      | -0.119 | 0.025 | 1.98E-06 | 0.015        | Lung      | IL17RD | 1.38E-04 | T              | -                        | +                |
| rs6787279 | rs1872942  | 3   | 57154878 | T  | C  | 0.161      | -0.119 | 0.025 | 1.93E-06 | 0.015        | Lung      | IL17RD | 0.000138 | C              | -                        | +                |
| rs6787279 | rs11188820 | 3   | 57157978 | T  | C  | 0.161      | -0.117 | 0.025 | 2.77E-06 | 0.011        | GTEx_lung | IL17RD | 7.85E-09 | T              | +                        | +                |
| rs6787279 | rs6768368  | 3   | 57162476 | T  | C  | 0.137      | -0.116 | 0.027 | 1.49E-05 | 0.002        | GTEx_lung | IL17RD | 7.45E-08 | T              | +                        | +                |
| rs6787279 | rs6772089  | 3   | 57163765 | T  | C  | 0.137      | -0.116 | 0.027 | 1.41E-05 | 0.002        | GTEx_lung | IL17RD | 1.35E-07 | T              | +                        | +                |
| rs6787279 | rs6775080  | 3   | 57164362 | T  | C  | 0.137      | -0.116 | 0.027 | 1.48E-05 | 0.002        | GTEx_lung | IL17RD | 1.35E-07 | T              | +                        | +                |
| rs6787279 | rs6787775  | 3   | 57164408 | T  | A  | 0.137      | -0.116 | 0.027 | 1.49E-05 | 0.002        | GTEx_lung | IL17RD | 1.35E-07 | T              | +                        | +                |
| rs6787279 | rs6787279  | 3   | 57163751 | C  | T  | 0.169      | -0.128 | 0.025 | 2.11E-07 | 0.123        | Lung      | IL17RD | 4.07E-07 | T              | -                        | +                |
| rs6787279 | rs6787279  | 3   | 57163751 | C  | T  | 0.169      | -0.128 | 0.025 | 2.11E-07 | 0.123        | GTEx_lung | IL17RD | 1.82E-06 | C              | +                        | +                |
| rs6787279 | rs34313207 | 3   | 57164929 | A  | G  | 0.137      | -0.118 | 0.027 | 9.89E-06 | 0.003        | Lung      | IL17RD | 2.31E-06 | G              | -                        | +                |
| rs6787279 | rs6768368  | 3   | 57162476 | T  | C  | 0.137      | -0.116 | 0.027 | 1.49E-05 | 0.002        | Lung      | IL17RD | 3.19E-06 | C              | -                        | +                |
| rs6787279 | rs6772089  | 3   | 57163765 | T  | C  | 0.137      | -0.116 | 0.027 | 1.41E-05 | 0.002        | Lung      | IL17RD | 3.19E-06 | C              | -                        | +                |
| rs6787279 | rs6796041  | 3   | 57163887 | T  | G  | 0.137      | -0.118 | 0.027 | 1.00E-05 | 0.003        | Lung      | IL17RD | 3.19E-06 | G              | -                        | +                |
| rs6787279 | rs6787775  | 3   | 57164408 | T  | A  | 0.137      | -0.116 | 0.027 | 1.49E-05 | 0.002        | Lung      | IL17RD | 3.19E-06 | A              | -                        | +                |
| rs6787279 | rs6796041  | 3   | 57163887 | T  | G  | 0.137      | -0.118 | 0.027 | 1.00E-05 | 0.003        | GTEx_lung | IL17RD | 3.47E-06 | T              | +                        | +                |
| rs6787279 | rs34313207 | 3   | 57164929 | A  | G  | 0.137      | -0.118 | 0.027 | 9.89E-06 | 0.003        | GTEx_lung | IL17RD | 3.47E-06 | A              | +                        | +                |
| rs6787279 | rs6775080  | 3   | 57164362 | T  | C  | 0.137      | -0.116 | 0.027 | 1.48E-05 | 0.002        | Lung      | IL17RD | 5.34E-06 | C              | -                        | +                |
| rs6787279 | rs11188820 | 3   | 57157978 | T  | C  | 0.161      | -0.117 | 0.025 | 2.77E-06 | 0.011        | Lung      | IL17RD | 1.27E-04 | C              | -                        | +                |
| rs6787279 | rs4681957  | 3   | 57165310 | A  | C  | 0.137      | -0.116 | 0.027 | 1.47E-05 | 0.002        | GTEx_lung | IL17RD | 1.35E-07 | A              | +                        | +                |
| rs6787279 | rs6803905  | 3   | 57168273 | C  | T  | 0.169      | -0.127 | 0.025 | 2.31E-07 | 0.112        | Lung      | IL17RD | 3.00E-07 | T              | -                        | +                |
| rs6787279 | rs6807593  | 3   | 57169648 | C  | T  | 0.137      | -0.116 | 0.027 | 1.55E-05 | 0.002        | GTEx_lung | IL17RD | 1.32E-06 | C              | +                        | +                |
| rs6787279 | rs6803905  | 3   | 57168273 | C  | T  | 0.169      | -0.127 | 0.025 | 2.31E-07 | 0.112        | GTEx_lung | IL17RD | 1.82E-06 | C              | +                        | +                |
| rs6787279 | rs6774301  | 3   | 57171554 | C  | G  | 0.137      | -0.116 | 0.027 | 1.55E-05 | 0.002        | GTEx_lung | IL17RD | 1.92E-06 | C              | +                        | +                |
| rs6787279 | rs6788981  | 3   | 57168341 | T  | C  | 0.137      | -0.118 | 0.027 | 1.00E-05 | 0.003        | Lung      | IL17RD | 2.31E-06 | C              | -                        | +                |
| rs6787279 | rs56164953 | 3   | 57168793 | A  | G  | 0.137      | -0.118 | 0.027 | 9.95E-06 | 0.003        | Lung      | IL17RD | 2.31E-06 | G              | -                        | +                |
| rs6787279 | rs1488121  | 3   | 57170495 | C  | G  | 0.137      | -0.118 | 0.027 | 9.75E-06 | 0.003        | Lung      | IL17RD | 2.31E-06 | G              | -                        | +                |
| rs6787279 | rs6774301  | 3   | 57171554 | C  | G  | 0.137      | -0.116 | 0.027 | 1.55E-05 | 0.002        | Lung      | IL17RD | 2.31E-06 | G              | -                        | +                |
| rs6787279 | rs79625814 | 3   | 57173021 | T  | A  | 0.137      | -0.118 | 0.027 | 9.75E-06 | 0.003        | Lung      | IL17RD | 2.31E-06 | A              | -                        | +                |
| rs6787279 | rs1488121  | 3   | 57170495 | C  | G  | 0.137      | -0.118 | 0.027 | 9.75E-06 | 0.003        | GTEx_lung | IL17RD | 2.81E-06 | C              | +                        | +                |
| rs6787279 | rs6445858  | 3   | 57171902 | C  | T  | 0.137      | -0.118 | 0.027 | 9.98E-06 | 0.003        | GTEx_lung | IL17RD | 2.81E-06 | C              | +                        | +                |
| rs6787279 | rs6788981  | 3   | 57168341 | T  | C  | 0.137      | -0.118 | 0.027 | 1.00E-05 | 0.003        | GTEx_lung | IL17RD | 3.47E-06 | T              | +                        | +                |
| rs6787279 | rs4681957  | 3   | 57165310 | A  | C  | 0.137      | -0.116 | 0.027 | 1.47E-05 | 0.002        | Lung      | IL17RD | 3.91E-06 | C              | -                        | +                |
| rs6787279 | rs6807593  | 3   | 57169648 | C  | T  | 0.137      | -0.116 | 0.027 | 1.55E-05 | 0.002        | Lung      | IL17RD | 3.91E-06 | T              | -                        | +                |
| rs6787279 | rs6445858  | 3   | 57171902 | C  | T  | 0.137      | -0.118 | 0.027 | 9.98E-06 | 0.003        | Lung      | IL17RD | 3.91E-06 | T              | -                        | +                |

| sentinel  | SNP        | CHR | BP        | A1 | A2 | A1FRE<br>Q | BETA   | SE    | P        | postpr<br>ob | tissue               | gene    | eqtl_p   | eqtl_c<br>oded | expr_sign_<br>eqtl_coded | expr_sign_<br>A1 |
|-----------|------------|-----|-----------|----|----|------------|--------|-------|----------|--------------|----------------------|---------|----------|----------------|--------------------------|------------------|
| rs6787279 | rs56164953 | 3   | 57168793  | A  | G  | 0.137      | -0.118 | 0.027 | 9.95E-06 | 0.003        | GTEx_lung            | IL17RD  | 6.67E-06 | A              | +                        | +                |
| rs6787279 | rs79625814 | 3   | 57173021  | T  | A  | 0.137      | -0.118 | 0.027 | 9.75E-06 | 0.003        | GTEx_lung            | IL17RD  | 7.70E-06 | T              | +                        | +                |
| rs6787279 | rs12494525 | 3   | 57178293  | T  | C  | 0.137      | -0.115 | 0.027 | 1.66E-05 | 0.002        | GTEx_lung            | IL17RD  | 9.49E-08 | T              | +                        | +                |
| rs6787279 | rs1906504  | 3   | 57175454  | G  | A  | 0.137      | -0.116 | 0.027 | 1.47E-05 | 0.002        | GTEx_lung            | IL17RD  | 1.70E-07 | G              | +                        | +                |
| rs6787279 | rs12496376 | 3   | 57177171  | G  | A  | 0.137      | -0.116 | 0.027 | 1.50E-05 | 0.002        | GTEx_lung            | IL17RD  | 1.70E-07 | G              | +                        | +                |
| rs6787279 | rs6801574  | 3   | 57177195  | T  | C  | 0.169      | -0.127 | 0.025 | 2.41E-07 | 0.108        | Lung                 | IL17RD  | 3.00E-07 | C              | -                        | +                |
| rs6787279 | rs76208275 | 3   | 57177716  | C  | T  | 0.137      | -0.116 | 0.027 | 1.51E-05 | 0.002        | GTEx_lung            | IL17RD  | 3.42E-07 | C              | +                        | +                |
| rs6787279 | rs17057784 | 3   | 57180402  | A  | C  | 0.138      | -0.118 | 0.027 | 9.37E-06 | 0.004        | GTEx_lung            | IL17RD  | 7.99E-07 | A              | +                        | +                |
| rs6787279 | rs17216900 | 3   | 57183877  | C  | T  | 0.170      | -0.122 | 0.025 | 6.90E-07 | 0.040        | Lung                 | IL17RD  | 1.30E-06 | T              | -                        | +                |
| rs6787279 | rs6801574  | 3   | 57177195  | T  | C  | 0.169      | -0.127 | 0.025 | 2.41E-07 | 0.108        | GTEx_lung            | IL17RD  | 1.48E-06 | T              | +                        | +                |
| rs6787279 | rs9823843  | 3   | 57181631  | C  | T  | 0.137      | -0.118 | 0.027 | 1.01E-05 | 0.003        | GTEx_lung            | IL17RD  | 1.92E-06 | C              | +                        | +                |
| rs6787279 | rs1386828  | 3   | 57176197  | A  | G  | 0.137      | -0.118 | 0.027 | 9.84E-06 | 0.003        | Lung                 | IL17RD  | 2.31E-06 | G              | -                        | +                |
| rs6787279 | rs1386829  | 3   | 57176505  | G  | A  | 0.137      | -0.118 | 0.027 | 9.81E-06 | 0.003        | Lung                 | IL17RD  | 2.31E-06 | A              | -                        | +                |
| rs6787279 | rs76208275 | 3   | 57177716  | C  | T  | 0.137      | -0.116 | 0.027 | 1.51E-05 | 0.002        | Lung                 | IL17RD  | 2.31E-06 | T              | -                        | +                |
| rs6787279 | rs12494525 | 3   | 57178293  | T  | C  | 0.137      | -0.115 | 0.027 | 1.66E-05 | 0.002        | Lung                 | IL17RD  | 2.31E-06 | C              | -                        | +                |
| rs6787279 | rs6808185  | 3   | 57179261  | G  | C  | 0.137      | -0.118 | 0.027 | 1.02E-05 | 0.003        | Lung                 | IL17RD  | 2.31E-06 | C              | -                        | +                |
| rs6787279 | rs17216900 | 3   | 57183877  | C  | T  | 0.170      | -0.122 | 0.025 | 6.90E-07 | 0.040        | GTEx_lung            | IL17RD  | 2.54E-06 | C              | +                        | +                |
| rs6787279 | rs12496376 | 3   | 57177171  | G  | A  | 0.137      | -0.116 | 0.027 | 1.50E-05 | 0.002        | Lung                 | IL17RD  | 2.62E-06 | A              | -                        | +                |
| rs6787279 | rs1386828  | 3   | 57176197  | A  | G  | 0.137      | -0.118 | 0.027 | 9.84E-06 | 0.003        | GTEx_lung            | IL17RD  | 2.73E-06 | A              | +                        | +                |
| rs6787279 | rs1386829  | 3   | 57176505  | G  | A  | 0.137      | -0.118 | 0.027 | 9.81E-06 | 0.003        | GTEx_lung            | IL17RD  | 2.73E-06 | G              | +                        | +                |
| rs6787279 | rs6808185  | 3   | 57179261  | G  | C  | 0.137      | -0.118 | 0.027 | 1.02E-05 | 0.003        | GTEx_lung            | IL17RD  | 2.81E-06 | G              | +                        | +                |
| rs6787279 | rs1906504  | 3   | 57175454  | G  | A  | 0.137      | -0.116 | 0.027 | 1.47E-05 | 0.002        | Lung                 | IL17RD  | 3.91E-06 | A              | -                        | +                |
| rs6787279 | rs17057784 | 3   | 57180402  | A  | C  | 0.138      | -0.118 | 0.027 | 9.37E-06 | 0.004        | Lung                 | IL17RD  | 4.89E-06 | C              | -                        | +                |
| rs6787279 | rs9823843  | 3   | 57181631  | C  | T  | 0.137      | -0.118 | 0.027 | 1.01E-05 | 0.003        | Lung                 | IL17RD  | 8.08E-06 | T              | -                        | +                |
| rs6787279 | rs1906505  | 3   | 57194272  | T  | C  | 0.119      | -0.134 | 0.029 | 2.75E-06 | 0.012        | GTEx_lung            | IL17RD  | 5.22E-08 | T              | +                        | +                |
| rs6787279 | rs35424480 | 3   | 57190811  | C  | G  | 0.120      | -0.133 | 0.028 | 2.86E-06 | 0.011        | GTEx_lung            | IL17RD  | 5.75E-08 | C              | +                        | +                |
| rs6787279 | rs3968279  | 3   | 57187078  | C  | T  | 0.120      | -0.134 | 0.028 | 2.66E-06 | 0.012        | GTEx_lung            | IL17RD  | 9.77E-08 | C              | +                        | +                |
| rs6787279 | rs9823220  | 3   | 57190211  | T  | G  | 0.119      | -0.135 | 0.029 | 2.16E-06 | 0.015        | GTEx_lung            | IL17RD  | 1.29E-07 | T              | +                        | +                |
| rs6787279 | rs7431253  | 3   | 57190452  | G  | A  | 0.119      | -0.133 | 0.028 | 3.23E-06 | 0.010        | GTEx_lung            | IL17RD  | 1.29E-07 | G              | +                        | +                |
| rs6787279 | rs9823220  | 3   | 57190211  | T  | G  | 0.119      | -0.135 | 0.029 | 2.16E-06 | 0.015        | Lung                 | IL17RD  | 1.36E-06 | G              | -                        | +                |
| rs6787279 | rs7431253  | 3   | 57190452  | G  | A  | 0.119      | -0.133 | 0.028 | 3.23E-06 | 0.010        | Lung                 | IL17RD  | 1.36E-06 | A              | -                        | +                |
| rs6787279 | rs1906505  | 3   | 57194272  | T  | C  | 0.119      | -0.134 | 0.029 | 2.75E-06 | 0.012        | Lung                 | IL17RD  | 1.36E-06 | C              | -                        | +                |
| rs6787279 | rs35424480 | 3   | 57190811  | C  | G  | 0.120      | -0.133 | 0.028 | 2.86E-06 | 0.011        | Lung                 | IL17RD  | 2.03E-06 | G              | -                        | +                |
| rs6787279 | rs3968279  | 3   | 57187078  | C  | T  | 0.120      | -0.134 | 0.028 | 2.66E-06 | 0.012        | Lung                 | IL17RD  | 2.29E-06 | T              | -                        | +                |
| rs3749833 | rs2057656  | 5   | 131809305 | C  | T  | 0.732      | -0.144 | 0.021 | 4.51E-12 | 0.134        | GTEx_whole_<br>blood | SLC22A5 | 5.19E-17 | C              | -                        | -                |
| rs3749833 | rs2548993  | 5   | 131808869 | A  | G  | 0.722      | -0.138 | 0.021 | 2.24E-11 | 0.028        | GTEx_whole_<br>blood | SLC22A5 | 6.41E-17 | A              | -                        | -                |
| rs3749833 | rs3749833  | 5   | 131799626 | C  | T  | 0.263      | 0.147  | 0.021 | 2.00E-12 | 0.295        | GTEx_whole_<br>blood | SLC22A5 | 1.59E-15 | C              | +                        | +                |
| rs3749833 | rs7713065  | 5   | 131788334 | C  | A  | 0.737      | -0.146 | 0.021 | 3.01E-12 | 0.199        | GTEx_whole_<br>blood | SLC22A5 | 2.83E-15 | C              | -                        | -                |

| sentinel  | SNP        | CHR | BP        | A1 | A2 | A1FRE<br>Q | BETA   | SE    | P        | postpr<br>ob | tissue               | gene            | eqtl_p   | eqtl_c<br>oded | expr_sign_<br>eqtl_coded | expr_sign_<br>A1 |
|-----------|------------|-----|-----------|----|----|------------|--------|-------|----------|--------------|----------------------|-----------------|----------|----------------|--------------------------|------------------|
| rs3749833 | rs3857440  | 5   | 131794069 | A  | G  | 0.263      | 0.145  | 0.021 | 3.73E-12 | 0.161        | GTEx_whole_<br>blood | SLC22A5         | 3.66E-15 | A              | +                        | +                |
| rs3749833 | rs1023518  | 5   | 131793772 | T  | G  | 0.263      | 0.145  | 0.021 | 4.49E-12 | 0.135        | GTEx_whole_<br>blood | SLC22A5         | 6.88E-15 | T              | +                        | +                |
| rs3749833 | rs10039559 | 5   | 131804507 | C  | T  | 0.232      | 0.139  | 0.022 | 1.67E-10 | 0.004        | GTEx_whole_<br>blood | SLC22A5         | 6.45E-11 | C              | +                        | +                |
| rs3749833 | rs10069798 | 5   | 131788421 | A  | T  | 0.232      | 0.136  | 0.022 | 4.10E-10 | 0.002        | GTEx_whole_<br>blood | SLC22A5         | 9.66E-11 | A              | +                        | +                |
| rs3749833 | rs10067603 | 5   | 131803868 | G  | A  | 0.232      | 0.139  | 0.022 | 1.60E-10 | 0.004        | GTEx_whole_<br>blood | SLC22A5         | 1.50E-10 | G              | +                        | +                |
| rs3749833 | rs11748326 | 5   | 131799959 | T  | C  | 0.237      | 0.140  | 0.022 | 8.39E-11 | 0.008        | GTEx_whole_<br>blood | SLC22A5         | 1.64E-10 | T              | +                        | +                |
| rs3749833 | rs10077785 | 5   | 131801158 | T  | C  | 0.237      | 0.140  | 0.022 | 9.28E-11 | 0.007        | GTEx_whole_<br>blood | SLC22A5         | 1.64E-10 | T              | +                        | +                |
| rs3749833 | rs59041913 | 5   | 131788135 | T  | C  | 0.232      | 0.137  | 0.022 | 3.51E-10 | 0.002        | GTEx_whole_<br>blood | SLC22A5         | 1.97E-10 | T              | +                        | +                |
| rs3749833 | rs3846729  | 5   | 131806768 | C  | G  | 0.232      | 0.139  | 0.022 | 1.49E-10 | 0.005        | GTEx_whole_<br>blood | SLC22A5         | 2.12E-10 | C              | +                        | +                |
| rs3749833 | rs2057657  | 5   | 131809316 | G  | A  | 0.232      | 0.138  | 0.022 | 2.26E-10 | 0.003        | GTEx_whole_<br>blood | SLC22A5         | 2.12E-10 | G              | +                        | +                |
| rs3749833 | rs2548993  | 5   | 131808869 | A  | G  | 0.722      | -0.138 | 0.021 | 2.24E-11 | 0.028        | Lung                 | SLC22A5         | 3.63E-09 | G              | +                        | -                |
| rs3749833 | rs3749833  | 5   | 131799626 | C  | T  | 0.263      | 0.147  | 0.021 | 2.00E-12 | 0.295        | Lung                 | SLC22A5         | 8.59E-09 | T              | -                        | +                |
| rs3749833 | rs1023518  | 5   | 131793772 | T  | G  | 0.263      | 0.145  | 0.021 | 4.49E-12 | 0.135        | Lung                 | SLC22A5         | 1.53E-08 | G              | -                        | +                |
| rs3749833 | rs3857440  | 5   | 131794069 | A  | G  | 0.263      | 0.145  | 0.021 | 3.73E-12 | 0.161        | Lung                 | SLC22A5         | 1.53E-08 | G              | -                        | +                |
| rs3749833 | rs7713065  | 5   | 131788334 | C  | A  | 0.737      | -0.146 | 0.021 | 3.01E-12 | 0.199        | Lung                 | SLC22A5         | 2.07E-08 | A              | +                        | -                |
| rs3749833 | rs2057656  | 5   | 131809305 | C  | T  | 0.732      | -0.144 | 0.021 | 4.51E-12 | 0.134        | Lung                 | SLC22A5         | 3.27E-08 | T              | +                        | -                |
| rs3749833 | rs3749833  | 5   | 131799626 | C  | T  | 0.263      | 0.147  | 0.021 | 2.00E-12 | 0.295        | Lung                 | Unknown<br>mRNA | 5.32E-08 | T              | -                        | +                |
| rs3749833 | rs1023518  | 5   | 131793772 | T  | G  | 0.263      | 0.145  | 0.021 | 4.49E-12 | 0.135        | Lung                 | Unknown<br>mRNA | 5.37E-08 | G              | -                        | +                |
| rs3749833 | rs3857440  | 5   | 131794069 | A  | G  | 0.263      | 0.145  | 0.021 | 3.73E-12 | 0.161        | Lung                 | Unknown<br>mRNA | 5.37E-08 | G              | -                        | +                |
| rs3749833 | rs2057656  | 5   | 131809305 | C  | T  | 0.732      | -0.144 | 0.021 | 4.51E-12 | 0.134        | Lung                 | Unknown<br>mRNA | 9.23E-08 | T              | +                        | -                |
| rs3749833 | rs7713065  | 5   | 131788334 | C  | A  | 0.737      | -0.146 | 0.021 | 3.01E-12 | 0.199        | Lung                 | Unknown<br>mRNA | 9.26E-08 | A              | +                        | -                |
| rs3749833 | rs2057656  | 5   | 131809305 | C  | T  | 0.732      | -0.144 | 0.021 | 4.51E-12 | 0.134        | GTEx_whole_<br>blood | AC116366.6      | 1.15E-07 | C              | +                        | +                |
| rs3749833 | rs2548993  | 5   | 131808869 | A  | G  | 0.722      | -0.138 | 0.021 | 2.24E-11 | 0.028        | GTEx_whole_<br>blood | AC116366.6      | 2.58E-07 | A              | +                        | +                |
| rs3749833 | rs3857440  | 5   | 131794069 | A  | G  | 0.263      | 0.145  | 0.021 | 3.73E-12 | 0.161        | GTEx_whole_<br>blood | AC116366.6      | 5.99E-07 | A              | -                        | -                |

| sentinel  | SNP        | CHR | BP        | A1 | A2 | A1FRE<br>Q | BETA   | SE    | P        | postpr<br>ob | tissue               | gene            | eql_p    | eql_c<br>oded | expr_sign_<br>eql_coded | expr_sign_<br>A1 |
|-----------|------------|-----|-----------|----|----|------------|--------|-------|----------|--------------|----------------------|-----------------|----------|---------------|-------------------------|------------------|
| rs3749833 | rs1023518  | 5   | 131793772 | T  | G  | 0.263      | 0.145  | 0.021 | 4.49E-12 | 0.135        | GTEx_whole_<br>blood | AC116366.6      | 7.55E-07 | T             | -                       | -                |
| rs3749833 | rs2548993  | 5   | 131808869 | A  | G  | 0.722      | -0.138 | 0.021 | 2.24E-11 | 0.028        | Lung                 | Unknown<br>mRNA | 7.91E-07 | G             | +                       | -                |
| rs3749833 | rs10060626 | 5   | 131803967 | G  | T  | 0.240      | 0.139  | 0.022 | 1.49E-10 | 0.005        | Lung                 | SLC22A5         | 1.91E-06 | T             | -                       | +                |
| rs3749833 | rs3749833  | 5   | 131799626 | C  | T  | 0.263      | 0.147  | 0.021 | 2.00E-12 | 0.295        | GTEx_whole_<br>blood | AC116366.6      | 2.12E-06 | C             | -                       | -                |
| rs3749833 | rs7713065  | 5   | 131788334 | C  | A  | 0.737      | -0.146 | 0.021 | 3.01E-12 | 0.199        | GTEx_whole_<br>blood | AC116366.6      | 2.61E-06 | C             | +                       | +                |
| rs3749833 | rs10060626 | 5   | 131803967 | G  | T  | 0.240      | 0.139  | 0.022 | 1.49E-10 | 0.005        | Lung                 | Unknown<br>mRNA | 2.84E-06 | T             | -                       | +                |
| rs3749833 | rs11748326 | 5   | 131799959 | T  | C  | 0.237      | 0.140  | 0.022 | 8.39E-11 | 0.008        | Lung                 | Unknown<br>mRNA | 2.89E-06 | C             | -                       | +                |
| rs3749833 | rs10077785 | 5   | 131801158 | T  | C  | 0.237      | 0.140  | 0.022 | 9.28E-11 | 0.007        | Lung                 | Unknown<br>mRNA | 2.89E-06 | C             | -                       | +                |
| rs3749833 | rs10067603 | 5   | 131803868 | G  | A  | 0.232      | 0.139  | 0.022 | 1.60E-10 | 0.004        | Lung                 | SLC22A5         | 2.91E-06 | A             | -                       | +                |
| rs3749833 | rs10039559 | 5   | 131804507 | C  | T  | 0.232      | 0.139  | 0.022 | 1.67E-10 | 0.004        | Lung                 | SLC22A5         | 2.91E-06 | T             | -                       | +                |
| rs3749833 | rs3846729  | 5   | 131806768 | C  | G  | 0.232      | 0.139  | 0.022 | 1.49E-10 | 0.005        | Lung                 | SLC22A5         | 2.91E-06 | G             | -                       | +                |
| rs3749833 | rs59041913 | 5   | 131788135 | T  | C  | 0.232      | 0.137  | 0.022 | 3.51E-10 | 0.002        | Lung                 | SLC22A5         | 3.14E-06 | C             | -                       | +                |
| rs3749833 | rs10069798 | 5   | 131788421 | A  | T  | 0.232      | 0.136  | 0.022 | 4.10E-10 | 0.002        | Lung                 | SLC22A5         | 3.14E-06 | T             | -                       | +                |
| rs3749833 | rs10067603 | 5   | 131803868 | G  | A  | 0.232      | 0.139  | 0.022 | 1.60E-10 | 0.004        | Lung                 | Unknown<br>mRNA | 3.59E-06 | A             | -                       | +                |
| rs3749833 | rs10039559 | 5   | 131804507 | C  | T  | 0.232      | 0.139  | 0.022 | 1.67E-10 | 0.004        | Lung                 | Unknown<br>mRNA | 3.59E-06 | T             | -                       | +                |
| rs3749833 | rs3846729  | 5   | 131806768 | C  | G  | 0.232      | 0.139  | 0.022 | 1.49E-10 | 0.005        | Lung                 | Unknown<br>mRNA | 3.59E-06 | G             | -                       | +                |
| rs3749833 | rs11748326 | 5   | 131799959 | T  | C  | 0.237      | 0.140  | 0.022 | 8.39E-11 | 0.008        | Lung                 | SLC22A5         | 3.63E-06 | C             | -                       | +                |
| rs3749833 | rs10077785 | 5   | 131801158 | T  | C  | 0.237      | 0.140  | 0.022 | 9.28E-11 | 0.007        | Lung                 | SLC22A5         | 3.63E-06 | C             | -                       | +                |
| rs3749833 | rs2057657  | 5   | 131809316 | G  | A  | 0.232      | 0.138  | 0.022 | 2.26E-10 | 0.003        | Lung                 | Unknown<br>mRNA | 4.26E-06 | A             | -                       | +                |
| rs3749833 | rs2057657  | 5   | 131809316 | G  | A  | 0.232      | 0.138  | 0.022 | 2.26E-10 | 0.003        | Lung                 | SLC22A5         | 6.40E-06 | A             | -                       | +                |
| rs3749833 | rs59041913 | 5   | 131788135 | T  | C  | 0.232      | 0.137  | 0.022 | 3.51E-10 | 0.002        | Lung                 | Unknown<br>mRNA | 8.65E-06 | C             | -                       | +                |
| rs3749833 | rs10069798 | 5   | 131788421 | A  | T  | 0.232      | 0.136  | 0.022 | 4.10E-10 | 0.002        | Lung                 | Unknown<br>mRNA | 8.65E-06 | T             | -                       | +                |
| rs3749833 | rs3749833  | 5   | 131799626 | C  | T  | 0.263      | 0.147  | 0.021 | 2.00E-12 | 0.295        | GTEx_lung            | SLC22A5         | 2.03E-05 | C             | +                       | +                |
| rs3749833 | rs11748326 | 5   | 131799959 | T  | C  | 0.237      | 0.140  | 0.022 | 8.39E-11 | 0.008        | GTEx_whole_<br>blood | AC116366.6      | 2.09E-05 | T             | -                       | -                |
| rs3749833 | rs10077785 | 5   | 131801158 | T  | C  | 0.237      | 0.140  | 0.022 | 9.28E-11 | 0.007        | GTEx_whole_<br>blood | AC116366.6      | 2.09E-05 | T             | -                       | -                |
| rs3749833 | rs2548993  | 5   | 131808869 | A  | G  | 0.722      | -0.138 | 0.021 | 2.24E-11 | 0.028        | GTEx_lung            | SLC22A5         | 2.42E-05 | A             | -                       | -                |

| sentinel  | SNP        | CHR | BP        | A1 | A2 | A1FRE<br>Q | BETA   | SE    | P        | postpr<br>ob | tissue                            | gene       | eqtl_p     | eqtl_c<br>oded | expr_sign_<br>eqtl_coded | expr_sign_<br>A1 |
|-----------|------------|-----|-----------|----|----|------------|--------|-------|----------|--------------|-----------------------------------|------------|------------|----------------|--------------------------|------------------|
| rs3749833 | rs3846729  | 5   | 131806768 | C  | G  | 0.232      | 0.139  | 0.022 | 1.49E-10 | 0.005        | GTE <sub>x</sub> _whole_<br>blood | AC116366.6 | 3.16E-05   | C              | -                        | -                |
| rs3749833 | rs2057657  | 5   | 131809316 | G  | A  | 0.232      | 0.138  | 0.022 | 2.26E-10 | 0.003        | GTE <sub>x</sub> _whole_<br>blood | AC116366.6 | 3.16E-05   | G              | -                        | -                |
| rs3749833 | rs10039559 | 5   | 131804507 | C  | T  | 0.232      | 0.139  | 0.022 | 1.67E-10 | 0.004        | GTE <sub>x</sub> _whole_<br>blood | AC116366.6 | 3.22E-05   | C              | -                        | -                |
| rs3749833 | rs3857440  | 5   | 131794069 | A  | G  | 0.263      | 0.145  | 0.021 | 3.73E-12 | 0.161        | GTE <sub>x</sub> _lung            | SLC22A5    | 3.31E-05   | A              | +                        | +                |
| rs3749833 | rs10067603 | 5   | 131803868 | G  | A  | 0.232      | 0.139  | 0.022 | 1.60E-10 | 0.004        | GTE <sub>x</sub> _whole_<br>blood | AC116366.6 | 3.57E-05   | G              | -                        | -                |
| rs3749833 | rs7713065  | 5   | 131788334 | C  | A  | 0.737      | -0.146 | 0.021 | 3.01E-12 | 0.199        | GTE <sub>x</sub> _lung            | SLC22A5    | 3.60E-05   | C              | -                        | -                |
| rs3749833 | rs10069798 | 5   | 131788421 | A  | T  | 0.232      | 0.136  | 0.022 | 4.10E-10 | 0.002        | GTE <sub>x</sub> _whole_<br>blood | AC116366.6 | 4.07E-05   | A              | -                        | -                |
| rs3749833 | rs1023518  | 5   | 131793772 | T  | G  | 0.263      | 0.145  | 0.021 | 4.49E-12 | 0.135        | GTE <sub>x</sub> _lung            | SLC22A5    | 5.12E-05   | T              | +                        | +                |
| rs3749833 | rs2548993  | 5   | 131808869 | A  | G  | 0.722      | -0.138 | 0.021 | 2.24E-11 | 0.028        | Lung                              | RAD50      | 5.61E-05   | G              | +                        | -                |
| rs3749833 | rs2057656  | 5   | 131809305 | C  | T  | 0.732      | -0.144 | 0.021 | 4.51E-12 | 0.134        | GTE <sub>x</sub> _lung            | SLC22A5    | 6.02E-05   | C              | -                        | -                |
| rs3749833 | rs59041913 | 5   | 131788135 | T  | C  | 0.232      | 0.137  | 0.022 | 3.51E-10 | 0.002        | GTE <sub>x</sub> _whole_<br>blood | AC116366.6 | 6.51E-05   | T              | -                        | -                |
| rs3749833 | rs11748326 | 5   | 131799959 | T  | C  | 0.237      | 0.140  | 0.022 | 8.39E-11 | 0.008        | GTE <sub>x</sub> _lung            | Y_RNA      | 7.33E-05   | T              | +                        | +                |
| rs3749833 | rs10077785 | 5   | 131801158 | T  | C  | 0.237      | 0.140  | 0.022 | 9.28E-11 | 0.007        | GTE <sub>x</sub> _lung            | Y_RNA      | 7.33E-05   | T              | +                        | +                |
| rs3749833 | rs2548993  | 5   | 131808869 | A  | G  | 0.722      | -0.138 | 0.021 | 2.24E-11 | 0.028        | GTE <sub>x</sub> _whole_<br>blood | Y_RNA      | 7.70E-05   | A              | -                        | -                |
| rs3749833 | rs10067603 | 5   | 131803868 | G  | A  | 0.232      | 0.139  | 0.022 | 1.60E-10 | 0.004        | GTE <sub>x</sub> _lung            | Y_RNA      | 1.34E-04   | G              | +                        | +                |
| rs3749833 | rs3846729  | 5   | 131806768 | C  | G  | 0.232      | 0.139  | 0.022 | 1.49E-10 | 0.005        | GTE <sub>x</sub> _lung            | Y_RNA      | 0.000137   | C              | +                        | +                |
| rs3749833 | rs2057657  | 5   | 131809316 | G  | A  | 0.232      | 0.138  | 0.022 | 2.26E-10 | 0.003        | GTE <sub>x</sub> _lung            | Y_RNA      | 0.000137   | G              | +                        | +                |
| rs3749833 | rs2057656  | 5   | 131809305 | C  | T  | 0.732      | -0.144 | 0.021 | 4.51E-12 | 0.134        | GTE <sub>x</sub> _whole_<br>blood | Y_RNA      | 0.000144   | C              | -                        | -                |
| rs3749833 | rs10039559 | 5   | 131804507 | C  | T  | 0.232      | 0.139  | 0.022 | 1.67E-10 | 0.004        | GTE <sub>x</sub> _lung            | Y_RNA      | 0.000167   | C              | +                        | +                |
| rs3749833 | rs10067603 | 5   | 131803868 | G  | A  | 0.232      | 0.139  | 0.022 | 1.60E-10 | 0.004        | GTE <sub>x</sub> _lung            | SLC22A5    | 0.000167   | G              | +                        | +                |
| rs3749833 | rs2057656  | 5   | 131809305 | C  | T  | 0.732      | -0.144 | 0.021 | 4.51E-12 | 0.134        | Lung                              | RAD50      | 0.000246   | T              | +                        | -                |
| rs3749833 | rs1023518  | 5   | 131793772 | T  | G  | 0.263      | 0.145  | 0.021 | 4.49E-12 | 0.135        | Lung                              | RAD50      | 0.000663   | G              | -                        | +                |
| rs3749833 | rs3857440  | 5   | 131794069 | A  | G  | 0.263      | 0.145  | 0.021 | 3.73E-12 | 0.161        | Lung                              | RAD50      | 0.000663   | G              | -                        | +                |
| rs3749833 | rs7713065  | 5   | 131788334 | C  | A  | 0.737      | -0.146 | 0.021 | 3.01E-12 | 0.199        | Lung                              | RAD50      | 0.000694   | A              | +                        | -                |
| rs9273410 | rs9273410  | 6   | 32627250  | A  | C  | 0.445      | 0.213  | 0.020 | 1.55E-27 | 0.999        | GTE <sub>x</sub> _whole_<br>blood | HLA-DQB1   | #####<br># | A              | -                        | -                |
| rs9273410 | rs9273410  | 6   | 32627250  | A  | C  | 0.445      | 0.213  | 0.020 | 1.55E-27 | 0.999        | GTE <sub>x</sub> _whole_<br>blood | HLA-DQB2   | #####<br># | A              | +                        | +                |
| rs9273410 | rs9273410  | 6   | 32627250  | A  | C  | 0.445      | 0.213  | 0.020 | 1.55E-27 | 0.999        | GTE <sub>x</sub> _lung            | HLA-DQB2   | #####<br># | A              | +                        | +                |
| rs9273410 | rs9273410  | 6   | 32627250  | A  | C  | 0.445      | 0.213  | 0.020 | 1.55E-27 | 0.999        | GTE <sub>x</sub> _whole_<br>blood | HLA-DQA2   | 7.65E-64   | A              | +                        | +                |
| rs9273410 | rs9273410  | 6   | 32627250  | A  | C  | 0.445      | 0.213  | 0.020 | 1.55E-27 | 0.999        | GTE <sub>x</sub> _lung            | HLA-DQB1   | 3.98E-55   | A              | -                        | -                |
| rs9273410 | rs9273410  | 6   | 32627250  | A  | C  | 0.445      | 0.213  | 0.020 | 1.55E-27 | 0.999        | GTE <sub>x</sub> _lung            | HLA-DQA1   | 9.50E-50   | A              | -                        | -                |

| sentinel  | SNP       | CHR | BP       | A1 | A2 | A1FRE<br>Q | BETA  | SE    | P        | postpr<br>ob | tissue               | gene             | eqtl_p   | eqtl_c<br>oded | expr_sign_<br>eqtl_coded | expr_sign_<br>A1 |
|-----------|-----------|-----|----------|----|----|------------|-------|-------|----------|--------------|----------------------|------------------|----------|----------------|--------------------------|------------------|
| rs9273410 | rs9273410 | 6   | 32627250 | A  | C  | 0.445      | 0.213 | 0.020 | 1.55E-27 | 0.999        | GTEx_lung            | HLA-DQA2         | 9.05E-47 | A              | +                        | +                |
| rs9273410 | rs9273410 | 6   | 32627250 | A  | C  | 0.445      | 0.213 | 0.020 | 1.55E-27 | 0.999        | GTEx_whole_<br>blood | HLA-DQA1         | 4.95E-44 | A              | -                        | -                |
| rs9273410 | rs9273410 | 6   | 32627250 | A  | C  | 0.445      | 0.213 | 0.020 | 1.55E-27 | 0.999        | Lung                 | HLA-DRB5         | 5.35E-42 | C              | +                        | -                |
| rs9273410 | rs9273410 | 6   | 32627250 | A  | C  | 0.445      | 0.213 | 0.020 | 1.55E-27 | 0.999        | Lung                 | HLA-DRB6         | 5.67E-41 | C              | -                        | +                |
| rs9273410 | rs9273410 | 6   | 32627250 | A  | C  | 0.445      | 0.213 | 0.020 | 1.55E-27 | 0.999        | GTEx_whole_<br>blood | HLA-DQB1-<br>AS1 | 2.09E-37 | A              | -                        | -                |
| rs9273410 | rs9273410 | 6   | 32627250 | A  | C  | 0.445      | 0.213 | 0.020 | 1.55E-27 | 0.999        | Lung                 | HLA-DQB2         | 3.71E-30 | C              | +                        | -                |
| rs9273410 | rs9273410 | 6   | 32627250 | A  | C  | 0.445      | 0.213 | 0.020 | 1.55E-27 | 0.999        | GTEx_whole_<br>blood | HLA-DRB6         | 4.57E-25 | A              | +                        | +                |
| rs9273410 | rs9273410 | 6   | 32627250 | A  | C  | 0.445      | 0.213 | 0.020 | 1.55E-27 | 0.999        | Lung                 | HLA-DQB1         | 2.09E-23 | C              | +                        | -                |
| rs9273410 | rs9273410 | 6   | 32627250 | A  | C  | 0.445      | 0.213 | 0.020 | 1.55E-27 | 0.999        | Lung                 | HLA-DQB1         | 6.06E-23 | C              | +                        | -                |
| rs9273410 | rs9273410 | 6   | 32627250 | A  | C  | 0.445      | 0.213 | 0.020 | 1.55E-27 | 0.999        | Lung                 | AGPAT1           | 6.39E-23 | C              | +                        | -                |
| rs9273410 | rs9273410 | 6   | 32627250 | A  | C  | 0.445      | 0.213 | 0.020 | 1.55E-27 | 0.999        | Lung                 | HLA-DQB1         | 3.21E-22 | C              | +                        | -                |
| rs9273410 | rs9273410 | 6   | 32627250 | A  | C  | 0.445      | 0.213 | 0.020 | 1.55E-27 | 0.999        | GTEx_lung            | HLA-DQB1-<br>AS1 | 5.69E-22 | A              | -                        | -                |
| rs9273410 | rs9273410 | 6   | 32627250 | A  | C  | 0.445      | 0.213 | 0.020 | 1.55E-27 | 0.999        | GTEx_lung            | HLA-DRB6         | 7.01E-22 | A              | +                        | +                |
| rs9273410 | rs9273410 | 6   | 32627250 | A  | C  | 0.445      | 0.213 | 0.020 | 1.55E-27 | 0.999        | GTEx_lung            | HLA-DRB9         | 2.71E-17 | A              | +                        | +                |
| rs9273410 | rs9273410 | 6   | 32627250 | A  | C  | 0.445      | 0.213 | 0.020 | 1.55E-27 | 0.999        | GTEx_whole_<br>blood | HLA-DRB9         | 5.47E-17 | A              | +                        | +                |
| rs9273410 | rs9273410 | 6   | 32627250 | A  | C  | 0.445      | 0.213 | 0.020 | 1.55E-27 | 0.999        | Lung                 | TAP2             | 3.62E-13 | C              | +                        | -                |
| rs9273410 | rs9273410 | 6   | 32627250 | A  | C  | 0.445      | 0.213 | 0.020 | 1.55E-27 | 0.999        | Lung                 | AGPAT1           | 1.27E-12 | C              | +                        | -                |
| rs9273410 | rs9273410 | 6   | 32627250 | A  | C  | 0.445      | 0.213 | 0.020 | 1.55E-27 | 0.999        | GTEx_lung            | HLA-DRB1         | 1.01E-11 | A              | -                        | -                |
| rs9273410 | rs9273410 | 6   | 32627250 | A  | C  | 0.445      | 0.213 | 0.020 | 1.55E-27 | 0.999        | GTEx_lung            | HLA-DRB5         | 7.48E-10 | A              | -                        | -                |
| rs9273410 | rs9273410 | 6   | 32627250 | A  | C  | 0.445      | 0.213 | 0.020 | 1.55E-27 | 0.999        | Lung                 | HLA-DQB2         | 4.44E-09 | C              | +                        | -                |
| rs9273410 | rs9273410 | 6   | 32627250 | A  | C  | 0.445      | 0.213 | 0.020 | 1.55E-27 | 0.999        | GTEx_whole_<br>blood | HLA-DRB5         | 1.48E-08 | A              | -                        | -                |
| rs9273410 | rs9273410 | 6   | 32627250 | A  | C  | 0.445      | 0.213 | 0.020 | 1.55E-27 | 0.999        | GTEx_lung            | C4A              | 4.51E-06 | A              | -                        | -                |
| rs9273410 | rs9273410 | 6   | 32627250 | A  | C  | 0.445      | 0.213 | 0.020 | 1.55E-27 | 0.999        | GTEx_whole_<br>blood | C4A              | 1.28E-05 | A              | -                        | -                |
| rs9273410 | rs9273410 | 6   | 32627250 | A  | C  | 0.445      | 0.213 | 0.020 | 1.55E-27 | 0.999        | Lung                 | HLA-DMA          | 2.09E-05 | C              | +                        | -                |
| rs9273410 | rs9273410 | 6   | 32627250 | A  | C  | 0.445      | 0.213 | 0.020 | 1.55E-27 | 0.999        | GTEx_lung            | HLA-DOB          | 2.56E-05 | A              | +                        | +                |
| rs9273410 | rs9273410 | 6   | 32627250 | A  | C  | 0.445      | 0.213 | 0.020 | 1.55E-27 | 0.999        | Lung                 | HLA-DPA1         | 4.73E-05 | C              | +                        | -                |
| rs9273410 | rs9273410 | 6   | 32627250 | A  | C  | 0.445      | 0.213 | 0.020 | 1.55E-27 | 0.999        | GTEx_whole_<br>blood | C4B              | 5.81E-05 | A              | +                        | +                |
| rs9273410 | rs9273410 | 6   | 32627250 | A  | C  | 0.445      | 0.213 | 0.020 | 1.55E-27 | 0.999        | GTEx_whole_<br>blood | CYP21A2          | 1.20E-04 | A              | +                        | +                |

**e-Table 10: Results of colocalisation analyses for rs80101740**

coloc\_snp\_eqtl = beta and p-value for association of SNP with expression; coloc\_snp\_gwas = beta and p-value for association of SNP with ACO in stage 1 (UK Biobank); PP.HX.abf = posterior probability of hypothesis X (H0: neither trait [expression and ACO] has a genetic association in the region; H1: only trait 1 has a genetic association in the region; H2: only trait 2 has a genetic association in the region; H3: both traits associated but different causal variants; H4: both traits associated with a shared single causal variant)

| Probe/coloc SNP  | nsnps | Gene symbol         | start:end           | Chr:pos    | coded/ non-coded | coloc_snp_eqtl     | coloc_snp_gwas     | PP.H0.abf | PP.H1.abf | PP.H2.abf | PP.H3.abf | PP.H4.abf |
|------------------|-------|---------------------|---------------------|------------|------------------|--------------------|--------------------|-----------|-----------|-----------|-----------|-----------|
| 100123669_TGI_at | 223   |                     | 100239113:100241470 | 5:99392151 | C/T              | -0.098 (P=0.0056)  | 0.029 (P=0.31)     | 9.73E-01  | 1.62E-02  | 9.56E-03  | 1.58E-04  | 7.28E-04  |
| 100124460_TGI_at | 24    | <i>RIOK2</i>        | 96498640:96518944   | 5:97499614 | C/T              | -0.11 (P=0.14)     | -0.14 (P=0.097)    | 9.97E-01  | 1.72E-03  | 9.67E-04  | 1.59E-06  | 7.87E-05  |
| 100126091_TGI_at | 845   | <i>FAM174A</i>      | 99871123:99922441   | 5:99427131 | C/T              | 0.15 (P=0.001)     | -0.04 (P=0.42)     | 8.87E-01  | 8.32E-02  | 2.44E-02  | 2.28E-03  | 3.44E-03  |
| 100129953_TGI_at | 2572  | <i>RGMB</i>         | 98104998:98129765   | 5:98471135 | C/A              | -0.014 (P=0.82)    | 0.37 (P=1.9e-06)   | 1.68E-01  | 6.20E-02  | 5.33E-01  | 1.97E-01  | 4.03E-02  |
| 100133549_TGI_at | 2572  |                     | 98128699:98129220   | 5:98471135 | C/A              | -0.015 (P=0.73)    | 0.37 (P=1.9e-06)   | 1.98E-01  | 3.21E-02  | 6.29E-01  | 1.02E-01  | 3.92E-02  |
| 100135322_TGI_at | 534   | <i>ST8SIA4</i>      | 100142903:100238970 | 5:99338518 | A/C              | 0.13 (P=0.17)      | -0.16 (P=0.053)    | 9.52E-01  | 2.82E-02  | 1.79E-02  | 5.30E-04  | 1.21E-03  |
| 100140190_TGI_at | 9     | <i>LIX1</i>         | 96430557:96478294   | 5:97477608 | C/T              | -0.072 (P=0.082)   | 0.057 (P=0.34)     | 9.99E-01  | 7.53E-04  | 2.64E-04  | 1.74E-07  | 2.50E-05  |
| 100140572_TGI_at | 2544  | <i>RGMB-AS1</i>     | 98105322:98108788   | 5:98108758 | G/C              | -0.066 (P=6.2e-10) | -0.066 (P=0.00042) | 7.99E-06  | 1.42E-01  | 2.54E-05  | 4.50E-01  | 4.08E-01  |
| 100140772_TGI_at | 2665  |                     | 98852906:98853305   | 5:98471135 | C/A              | -0.031 (P=0.59)    | 0.37 (P=1.9e-06)   | 2.29E-01  | 3.92E-02  | 5.97E-01  | 1.02E-01  | 3.18E-02  |
| 100146169_TGI_at | 525   | <i>ST8SIA4</i>      | 100145359:100238987 | 5:99338518 | A/C              | 0.14 (P=0.19)      | -0.16 (P=0.053)    | 9.50E-01  | 3.01E-02  | 1.78E-02  | 5.62E-04  | 1.20E-03  |
| 100152307_TGI_at | 10    | <i>LIX1</i>         | 96427573:96478520   | 5:97471327 | G/C              | -0.18 (P=0.051)    | 0.058 (P=0.49)     | 9.99E-01  | 1.08E-03  | 2.77E-04  | 2.69E-07  | 2.96E-05  |
| 100154459_TGI_at | 3003  | <i>LOC100289230</i> | 98264891:98266713   | 5:98312447 | A/C              | -0.12 (P=8.1e-05)  | -0.079 (P=8.7e-05) | 3.89E-02  | 8.53E-02  | 1.24E-01  | 2.72E-01  | 4.80E-01  |
| 100159234_TGI_at | 2575  | <i>RGMB</i>         | 98104999:98132196   | 5:98130968 | A/G              | 0.66 (P=2.9e-170)  | -0.048 (P=0.058)   | 3.84E-149 | 2.35E-01  | 1.22E-148 | 7.47E-01  | 1.73E-02  |
| 100160906_TGI_at | 2443  |                     | 98015482:98016692   | 5:98471135 | C/A              | 0.044 (P=0.59)     | 0.37 (P=1.9e-06)   | 2.05E-01  | 2.63E-02  | 6.49E-01  | 8.34E-02  | 3.70E-02  |
| 100162289_TGI_at | 2990  | <i>CHD1</i>         | 98191448:98262240   | 5:98471135 | C/A              | -0.032 (P=0.68)    | 0.37 (P=1.9e-06)   | 1.85E-01  | 4.23E-02  | 5.91E-01  | 1.35E-01  | 4.67E-02  |
| 100301011_TGI_at | 247   | <i>ST8SIA4</i>      | 100221014:100238970 | 5:99338518 | A/C              | 0.24 (P=0.022)     | -0.16 (P=0.053)    | 9.69E-01  | 1.97E-02  | 1.03E-02  | 2.08E-04  | 1.10E-03  |
| 100301033_TGI_at | 2547  |                     | 98104999:98116889   | 5:98471135 | C/A              | 0.013 (P=0.85)     | 0.37 (P=1.9e-06)   | 1.94E-01  | 3.73E-02  | 6.14E-01  | 1.18E-01  | 3.63E-02  |
| 100303038_TGI_at | 2990  | <i>CHD1</i>         | 98190908:98262238   | 5:98471135 | C/A              | 0.021 (P=0.72)     | 0.37 (P=1.9e-06)   | 1.90E-01  | 3.74E-02  | 6.06E-01  | 1.19E-01  | 4.74E-02  |
| 100305010_TGI_at | 523   | <i>ST8SIA4</i>      | 100145679:100146257 | 5:99338518 | A/C              | 0.13 (P=0.27)      | -0.16 (P=0.053)    | 9.54E-01  | 2.65E-02  | 1.78E-02  | 4.93E-04  | 1.11E-03  |
| 100307991_TGI_at | 845   | <i>FAM174A</i>      | 99871050:99921974   | 5:99079537 | C/T              | 0.031 (P=0.62)     | 0.14 (P=0.014)     | 9.29E-01  | 4.30E-02  | 2.55E-02  | 1.18E-03  | 1.67E-03  |
| 100312416_TGI_at | 2865  |                     | 98204849:98208136   | 5:98471135 | C/A              | 0.034 (P=0.7)      | 0.37 (P=1.9e-06)   | 1.92E-01  | 3.75E-02  | 6.12E-01  | 1.19E-01  | 3.82E-02  |



**e-Table 11: Results of PhenoScanner lookup for SNPs in 99% credible set at 1% FDR level**

sentinel=sentinel variant in ACO GWAS; SNP=SNP in 99% credible set; chr=chromosome; pos=position (hg19); eff=effect allele; other=other allele; efo=EFO ontology term for trait or phenotype; FDR = false discovery rate (calculated by authors); pmid=PubMed ID (UKBB = Neale UK Biobank GWAS effort). For studies with binary outcomes, number of controls can be calculated as “n” – “n\_cases”. See also

<http://www.phenoscaner.medschl.cam.ac.uk/information/>

| sentinel   | SNP       | chr_bp_eff_other | trait                                                                                         | efo                                         | pmid     | ancestry | beta   | se    | p        | n      | n_cases | n_studies | unit      | FDR      |
|------------|-----------|------------------|-----------------------------------------------------------------------------------------------|---------------------------------------------|----------|----------|--------|-------|----------|--------|---------|-----------|-----------|----------|
| rs35570272 | rs7631407 | 3:33036218_C_G   | Neutrophil percentage of granulocytes                                                         | EFO_0004586                                 | 27863252 | European | -0.027 | 0.004 | 1.34E-11 | 173480 | 0       | 2         | IVNT      | 1.36E-08 |
| rs35570272 | rs7631407 | 3:33036218_C_G   | Sum eosinophil basophil counts                                                                | EFO_0004586                                 | 27863252 | European | 0.025  | 0.004 | 1.11E-10 | 173480 | 0       | 2         | IVNT      | 8.99E-08 |
| rs35570272 | rs7631407 | 3:33036218_C_G   | Eosinophil percentage of granulocytes                                                         | EFO_0004586                                 | 27863252 | European | 0.024  | 0.004 | 4.26E-10 | 173480 | 0       | 2         | IVNT      | 3.16E-07 |
| rs35570272 | rs7631407 | 3:33036218_C_G   | Eosinophil percentage of white cells                                                          | EFO_0004586                                 | 27863252 | European | 0.024  | 0.004 | 4.52E-10 | 173480 | 0       | 2         | IVNT      | 3.33E-07 |
| rs35570272 | rs7631407 | 3:33036218_C_G   | Eosinophil count                                                                              | EFO_0004586                                 | 27863252 | European | 0.023  | 0.004 | 2.41E-09 | 173480 | 0       | 2         | IVNT      | 1.41E-06 |
| rs35570272 | rs7631407 | 3:33036218_C_G   | No blood clot, bronchitis, emphysema, asthma, rhinitis, eczema or allergy diagnosed by doctor | -                                           | UKBB     | European | -0.006 | 0.001 | 3.32E-07 | 336782 | 228530  | 1         | risk diff | 1.23E-04 |
| rs35570272 | rs7631407 | 3:33036218_C_G   | Allergic disease                                                                              | EFO_0003785                                 | 29083406 | European | 0.029  | 0.006 | 3.29E-06 | 360838 | 180129  | 13        | log OR    | 9.62E-04 |
| rs35570272 | rs7631407 | 3:33036218_C_G   | Self-reported asthma                                                                          | EFO_0000270                                 | UKBB     | European | 0.004  | 0.001 | 4.96E-06 | 337159 | 39049   | 1         | risk diff | 1.39E-03 |
| rs35570272 | rs7631407 | 3:33036218_C_G   | Asthma                                                                                        | EFO_0000270                                 | UKBB     | European | 0.004  | 0.001 | 1.61E-05 | 336782 | 38791   | 1         | risk diff | 3.90E-03 |
| rs35570272 | rs7631407 | 3:33036218_C_G   | Hayfever, allergic rhinitis or eczema                                                         | EFO_0003956;<br>EFO_0005854;<br>EFO_0000274 | UKBB     | European | 0.005  | 0.001 | 1.84E-05 | 336782 | 77891   | 1         | risk diff | 4.40E-03 |
| rs35570272 | rs9828592 | 3:33044339_C_T   | Self-reported asthma                                                                          | EFO_0000270                                 | UKBB     | European | 0.005  | 0.001 | 7.32E-11 | 337159 | 39049   | 1         | risk diff | 6.30E-08 |
| rs35570272 | rs9828592 | 3:33044339_C_T   | No blood clot, bronchitis, emphysema, asthma, rhinitis, eczema or allergy diagnosed by doctor | -                                           | UKBB     | European | -0.007 | 0.001 | 1.94E-10 | 336782 | 228530  | 1         | risk diff | 1.52E-07 |
| rs35570272 | rs9828592 | 3:33044339_C_T   | Asthma                                                                                        | EFO_0000270                                 | UKBB     | European | 0.005  | 0.001 | 4.69E-10 | 336782 | 38791   | 1         | risk diff | 3.44E-07 |
| rs35570272 | rs9828592 | 3:33044339_C_T   | Neutrophil percentage of granulocytes                                                         | EFO_0004586                                 | 27863252 | European | -0.019 | 0.004 | 2.39E-07 | 173480 | 0       | 2         | IVNT      | 9.12E-05 |
| rs35570272 | rs9828592 | 3:33044339_C_T   | Sum eosinophil basophil counts                                                                | EFO_0004586                                 | 27863252 | European | 0.018  | 0.004 | 5.65E-07 | 173480 | 0       | 2         | IVNT      | 2.00E-04 |
| rs35570272 | rs9828592 | 3:33044339_C_T   | Allergic disease                                                                              | EFO_0003785                                 | 29083406 | European | 0.028  | 0.006 | 1.05E-06 | 360838 | 180129  | 13        | log OR    | 3.43E-04 |
| rs35570272 | rs9828592 | 3:33044339_C_T   | Eosinophil percentage of granulocytes                                                         | EFO_0004586                                 | 27863252 | European | 0.017  | 0.004 | 1.50E-06 | 173480 | 0       | 2         | IVNT      | 4.70E-04 |
| rs35570272 | rs9828592 | 3:33044339_C_T   | Hayfever, allergic rhinitis or eczema                                                         | EFO_0003956;<br>EFO_0005854;<br>EFO_0000274 | UKBB     | European | 0.005  | 0.001 | 1.93E-06 | 336782 | 77891   | 1         | risk diff | 5.96E-04 |
| rs35570272 | rs9828592 | 3:33044339_C_T   | Eosinophil percentage of white cells                                                          | EFO_0004586                                 | 27863252 | European | 0.017  | 0.004 | 3.59E-06 | 173480 | 0       | 2         | IVNT      | 1.04E-03 |
| rs35570272 | rs9828592 | 3:33044339_C_T   | Eosinophil count                                                                              | EFO_0004586                                 | 27863252 | European | 0.017  | 0.004 | 4.05E-06 | 173480 | 0       | 2         | IVNT      | 1.16E-03 |
| rs35570272 | rs9828592 | 3:33044339_C_T   | Wheeze or whistling in the chest in last year                                                 | EFO_0009715                                 | UKBB     | European | 0.004  | 0.001 | 2.03E-05 | 331257 | 68531   | 1         | risk diff | 4.81E-03 |
| rs35570272 | rs9828592 | 3:33044339_C_T   | Neuroticism                                                                                   | EFO_0007660;<br>EFO_0004257                 | 29292387 | European | -0.010 | 0.003 | 3.94E-05 | 168105 | 0       | 2         | SD        | 8.48E-03 |
| rs35570272 | rs7646283 | 3:33046480_T_C   | Neutrophil percentage of granulocytes                                                         | EFO_0004586                                 | 27863252 | European | 0.030  | 0.004 | 3.87E-15 | 173480 | 0       | 2         | IVNT      | 1.01E-11 |
| rs35570272 | rs7646283 | 3:33046480_T_C   | Sum eosinophil basophil counts                                                                | EFO_0004586                                 | 27863252 | European | -0.029 | 0.004 | 2.96E-14 | 173480 | 0       | 2         | IVNT      | 6.18E-11 |
| rs35570272 | rs7646283 | 3:33046480_T_C   | Eosinophil percentage of white cells                                                          | EFO_0004586                                 | 27863252 | European | -0.028 | 0.004 | 7.59E-14 | 173480 | 0       | 2         | IVNT      | 1.42E-10 |
| rs35570272 | rs7646283 | 3:33046480_T_C   | Eosinophil percentage of granulocytes                                                         | EFO_0004586                                 | 27863252 | European | -0.028 | 0.004 | 8.39E-14 | 173480 | 0       | 2         | IVNT      | 1.53E-10 |
| rs35570272 | rs7646283 | 3:33046480_T_C   | Eosinophil count                                                                              | EFO_0004586                                 | 27863252 | European | -0.027 | 0.004 | 4.34E-13 | 173480 | 0       | 2         | IVNT      | 6.49E-10 |
| rs35570272 | rs7646283 | 3:33046480_T_C   | No blood clot, bronchitis, emphysema, asthma, rhinitis, eczema or allergy diagnosed by doctor | -                                           | UKBB     | European | 0.009  | 0.001 | 7.78E-13 | 336782 | 228530  | 1         | risk diff | 1.09E-09 |
| rs35570272 | rs7646283 | 3:33046480_T_C   | Self-reported asthma                                                                          | EFO_0000270                                 | UKBB     | European | -0.005 | 0.001 | 4.41E-11 | 337159 | 39049   | 1         | risk diff | 3.99E-08 |
| rs35570272 | rs7646283 | 3:33046480_T_C   | Asthma                                                                                        | EFO_0000270                                 | UKBB     | European | -0.005 | 0.001 | 1.13E-10 | 336782 | 38791   | 1         | risk diff | 9.15E-08 |

| sentinel   | SNP        | chr_bp_eff_other | trait                                                                                         | efo                                         | pmid     | ancestry | beta   | se    | p        | n      | n_cases | n_studies | unit          | FDR      |
|------------|------------|------------------|-----------------------------------------------------------------------------------------------|---------------------------------------------|----------|----------|--------|-------|----------|--------|---------|-----------|---------------|----------|
| rs35570272 | rs7646283  | 3:33046480_T_C   | Hayfever, allergic rhinitis or eczema                                                         | EFO_0003956;<br>EFO_0005854;<br>EFO_0000274 | UKBB     | European | -0.006 | 0.001 | 2.32E-08 | 336782 | 77891   | 1         | risk diff     | 1.11E-05 |
| rs35570272 | rs7646283  | 3:33046480_T_C   | Allergic disease                                                                              | EFO_0003785                                 | 29083406 | European | -0.032 | 0.006 | 6.13E-08 | 360838 | 180129  | 13        | log OR        | 2.67E-05 |
| rs35570272 | rs34064757 | 3:33047283_A_G   | Neutrophil percentage of granulocytes                                                         | EFO_0004586                                 | 27863252 | European | -0.030 | 0.004 | 2.72E-15 | 173480 | 0       | 2         | IVNT          | 7.71E-12 |
| rs35570272 | rs34064757 | 3:33047283_A_G   | Neutrophil percentage of granulocytes                                                         | EFO_0007994                                 | 27863252 | European | 0.030  | 0.004 | 3.00E-15 | -      | -       | -         | unit decrease | 8.21E-12 |
| rs35570272 | rs34064757 | 3:33047283_A_G   | Sum eosinophil basophil counts                                                                | EFO_0004586                                 | 27863252 | European | 0.029  | 0.004 | 1.94E-14 | 173480 | 0       | 2         | IVNT          | 4.24E-11 |
| rs35570272 | rs34064757 | 3:33047283_A_G   | Sum eosinophil basophil counts                                                                | EFO_0005090;<br>EFO_0004842                 | 27863252 | European | 0.029  | 0.004 | 2.00E-14 | -      | -       | -         | unit increase | 4.33E-11 |
| rs35570272 | rs34064757 | 3:33047283_A_G   | Eosinophil percentage of granulocytes                                                         | EFO_0007996                                 | 27863252 | European | 0.028  | 0.004 | 6.00E-14 | -      | -       | -         | unit increase | 1.17E-10 |
| rs35570272 | rs34064757 | 3:33047283_A_G   | Eosinophil percentage of white cells                                                          | EFO_0007991                                 | 27863252 | European | 0.028  | 0.004 | 6.00E-14 | -      | -       | -         | unit increase | 1.17E-10 |
| rs35570272 | rs34064757 | 3:33047283_A_G   | Eosinophil percentage of white cells                                                          | EFO_0004586                                 | 27863252 | European | 0.028  | 0.004 | 6.32E-14 | 173480 | 0       | 2         | IVNT          | 1.22E-10 |
| rs35570272 | rs34064757 | 3:33047283_A_G   | Eosinophil percentage of granulocytes                                                         | EFO_0004586                                 | 27863252 | European | 0.028  | 0.004 | 6.38E-14 | 173480 | 0       | 2         | IVNT          | 1.23E-10 |
| rs35570272 | rs34064757 | 3:33047283_A_G   | Eosinophil counts                                                                             | EFO_0004842                                 | 27863252 | European | 0.027  | 0.004 | 3.00E-13 | -      | -       | -         | unit increase | 4.80E-10 |
| rs35570272 | rs34064757 | 3:33047283_A_G   | Eosinophil count                                                                              | EFO_0004586                                 | 27863252 | European | 0.027  | 0.004 | 3.33E-13 | 173480 | 0       | 2         | IVNT          | 5.19E-10 |
| rs35570272 | rs34064757 | 3:33047283_A_G   | No blood clot, bronchitis, emphysema, asthma, rhinitis, eczema or allergy diagnosed by doctor | -                                           | UKBB     | European | -0.008 | 0.001 | 9.06E-13 | 336782 | 228530  | 1         | risk diff     | 1.25E-09 |
| rs35570272 | rs34064757 | 3:33047283_A_G   | Self-reported asthma                                                                          | EFO_0000270                                 | UKBB     | European | 0.005  | 0.001 | 4.22E-11 | 337159 | 39049   | 1         | risk diff     | 3.85E-08 |
| rs35570272 | rs34064757 | 3:33047283_A_G   | Asthma                                                                                        | EFO_0000270                                 | UKBB     | European | 0.005  | 0.001 | 1.09E-10 | 336782 | 38791   | 1         | risk diff     | 8.91E-08 |
| rs35570272 | rs34064757 | 3:33047283_A_G   | Hayfever, allergic rhinitis or eczema                                                         | EFO_0003956;<br>EFO_0005854;<br>EFO_0000274 | UKBB     | European | 0.006  | 0.001 | 2.42E-08 | 336782 | 77891   | 1         | risk diff     | 1.15E-05 |
| rs35570272 | rs34064757 | 3:33047283_A_G   | Allergic disease                                                                              | EFO_0003785                                 | 29083406 | European | 0.032  | 0.006 | 6.92E-08 | 360838 | 180129  | 13        | log OR        | 2.98E-05 |
| rs35570272 | rs35570272 | 3:33047662_T_G   | Self-reported asthma                                                                          | EFO_0000270                                 | UKBB     | European | -0.006 | 0.001 | 7.45E-13 | 337159 | 39049   | 1         | risk diff     | 1.06E-09 |
| rs35570272 | rs35570272 | 3:33047662_T_G   | No blood clot, bronchitis, emphysema, asthma, rhinitis, eczema or allergy diagnosed by doctor | -                                           | UKBB     | European | 0.008  | 0.001 | 1.01E-12 | 336782 | 228530  | 1         | risk diff     | 1.37E-09 |
| rs35570272 | rs35570272 | 3:33047662_T_G   | Neutrophil percentage of granulocytes                                                         | EFO_0004586                                 | 27863252 | European | 0.026  | 0.004 | 1.89E-12 | 173480 | 0       | 2         | IVNT          | 2.26E-09 |
| rs35570272 | rs35570272 | 3:33047662_T_G   | Sum eosinophil basophil counts                                                                | EFO_0004586                                 | 27863252 | European | -0.026 | 0.004 | 2.56E-12 | 173480 | 0       | 2         | IVNT          | 2.98E-09 |
| rs35570272 | rs35570272 | 3:33047662_T_G   | Asthma                                                                                        | EFO_0000270                                 | UKBB     | European | -0.006 | 0.001 | 2.83E-12 | 336782 | 38791   | 1         | risk diff     | 3.27E-09 |
| rs35570272 | rs35570272 | 3:33047662_T_G   | Eosinophil percentage of granulocytes                                                         | EFO_0004586                                 | 27863252 | European | -0.024 | 0.004 | 4.92E-11 | 173480 | 0       | 2         | IVNT          | 4.41E-08 |
| rs35570272 | rs35570272 | 3:33047662_T_G   | Eosinophil count                                                                              | EFO_0004586                                 | 27863252 | European | -0.024 | 0.004 | 5.13E-11 | 173480 | 0       | 2         | IVNT          | 4.59E-08 |
| rs35570272 | rs35570272 | 3:33047662_T_G   | Eosinophil percentage of white cells                                                          | EFO_0004586                                 | 27863252 | European | -0.024 | 0.004 | 7.39E-11 | 173480 | 0       | 2         | IVNT          | 6.31E-08 |
| rs35570272 | rs35570272 | 3:33047662_T_G   | Allergic disease                                                                              | EFO_0003785                                 | 29083406 | European | -0.031 | 0.006 | 1.83E-07 | 360838 | 180129  | 13        | log OR        | 7.09E-05 |
| rs35570272 | rs35570272 | 3:33047662_T_G   | Hayfever, allergic rhinitis or eczema                                                         | EFO_0003956;<br>EFO_0005854;<br>EFO_0000274 | UKBB     | European | -0.005 | 0.001 | 2.25E-07 | 336782 | 77891   | 1         | risk diff     | 8.60E-05 |
| rs35570272 | rs35570272 | 3:33047662_T_G   | Wheeze or whistling in the chest in last year                                                 | EFO_0009715                                 | UKBB     | European | -0.005 | 0.001 | 8.76E-06 | 331257 | 68531   | 1         | risk diff     | 2.31E-03 |
| rs35570272 | rs73057087 | 3:33068268_G_A   | No blood clot, bronchitis, emphysema, asthma, rhinitis, eczema or allergy diagnosed by doctor | -                                           | UKBB     | European | 0.009  | 0.001 | 2.42E-15 | 336782 | 228530  | 1         | risk diff     | 6.99E-12 |
| rs35570272 | rs73057087 | 3:33068268_G_A   | Hayfever, allergic rhinitis or eczema                                                         | EFO_0003956;<br>EFO_0005854;<br>EFO_0000274 | UKBB     | European | -0.007 | 0.001 | 4.02E-11 | 336782 | 77891   | 1         | risk diff     | 3.69E-08 |
| rs35570272 | rs73057087 | 3:33068268_G_A   | Sum eosinophil basophil counts                                                                | EFO_0004586                                 | 27863252 | European | -0.023 | 0.004 | 1.22E-09 | 173480 | 0       | 2         | IVNT          | 7.84E-07 |
| rs35570272 | rs73057087 | 3:33068268_G_A   | Neutrophil percentage of granulocytes                                                         | EFO_0004586                                 | 27863252 | European | 0.022  | 0.004 | 2.76E-09 | 173480 | 0       | 2         | IVNT          | 1.60E-06 |
| rs35570272 | rs73057087 | 3:33068268_G_A   | Eosinophil count                                                                              | EFO_0004586                                 | 27863252 | European | -0.022 | 0.004 | 2.87E-09 | 173480 | 0       | 2         | IVNT          | 1.66E-06 |

| sentinel   | SNP        | chr_bp_eff_other | trait                                                                                         | efo                                         | pmid     | ancestry | beta   | se    | p        | n      | n_cases | n_studies | unit      | FDR      |
|------------|------------|------------------|-----------------------------------------------------------------------------------------------|---------------------------------------------|----------|----------|--------|-------|----------|--------|---------|-----------|-----------|----------|
| rs35570272 | rs73057087 | 3:33068268_G_A   | Eosinophil percentage of white cells                                                          | EFO_0004586                                 | 27863252 | European | -0.022 | 0.004 | 4.84E-09 | 173480 | 0       | 2         | IVNT      | 2.58E-06 |
| rs35570272 | rs73057087 | 3:33068268_G_A   | Eosinophil percentage of granulocytes                                                         | EFO_0004586                                 | 27863252 | European | -0.021 | 0.004 | 7.93E-09 | 173480 | 0       | 2         | IVNT      | 4.07E-06 |
| rs35570272 | rs73057087 | 3:33068268_G_A   | Allergic disease                                                                              | EFO_0003785                                 | 29083406 | European | -0.032 | 0.006 | 4.51E-08 | 360838 | 180129  | 13        | log OR    | 2.02E-05 |
| rs35570272 | rs73057087 | 3:33068268_G_A   | Self-reported asthma                                                                          | EFO_0000270                                 | UKBB     | European | -0.004 | 0.001 | 2.66E-07 | 337159 | 39049   | 1         | risk diff | 1.01E-04 |
| rs35570272 | rs73057087 | 3:33068268_G_A   | Asthma                                                                                        | EFO_0000270                                 | UKBB     | European | -0.004 | 0.001 | 5.43E-07 | 336782 | 38791   | 1         | risk diff | 1.93E-04 |
| rs35570272 | rs4547648  | 3:33080256_G_A   | No blood clot, bronchitis, emphysema, asthma, rhinitis, eczema or allergy diagnosed by doctor | -                                           | UKBB     | European | 0.009  | 0.001 | 5.23E-15 | 336782 | 228530  | 1         | risk diff | 1.32E-11 |
| rs35570272 | rs4547648  | 3:33080256_G_A   | Hayfever, allergic rhinitis or eczema                                                         | EFO_0003956;<br>EFO_0005854;<br>EFO_0000274 | UKBB     | European | -0.007 | 0.001 | 7.29E-11 | 336782 | 77891   | 1         | risk diff | 6.29E-08 |
| rs35570272 | rs4547648  | 3:33080256_G_A   | Sum eosinophil basophil counts                                                                | EFO_0004586                                 | 27863252 | European | -0.023 | 0.004 | 1.12E-09 | 173480 | 0       | 2         | IVNT      | 7.23E-07 |
| rs35570272 | rs4547648  | 3:33080256_G_A   | Neutrophil percentage of granulocytes                                                         | EFO_0004586                                 | 27863252 | European | 0.022  | 0.004 | 3.38E-09 | 173480 | 0       | 2         | IVNT      | 1.93E-06 |
| rs35570272 | rs4547648  | 3:33080256_G_A   | Eosinophil count                                                                              | EFO_0004586                                 | 27863252 | European | -0.022 | 0.004 | 3.48E-09 | 173480 | 0       | 2         | IVNT      | 1.97E-06 |
| rs35570272 | rs4547648  | 3:33080256_G_A   | Eosinophil percentage of white cells                                                          | EFO_0004586                                 | 27863252 | European | -0.021 | 0.004 | 6.73E-09 | 173480 | 0       | 2         | IVNT      | 3.50E-06 |
| rs35570272 | rs4547648  | 3:33080256_G_A   | Eosinophil percentage of granulocytes                                                         | EFO_0004586                                 | 27863252 | European | -0.021 | 0.004 | 1.32E-08 | 173480 | 0       | 2         | IVNT      | 6.55E-06 |
| rs35570272 | rs4547648  | 3:33080256_G_A   | Allergic disease                                                                              | EFO_0003785                                 | 29083406 | European | -0.033 | 0.006 | 3.06E-08 | 360838 | 180129  | 13        | log OR    | 1.43E-05 |
| rs35570272 | rs4547648  | 3:33080256_G_A   | Self-reported asthma                                                                          | EFO_0000270                                 | UKBB     | European | -0.004 | 0.001 | 3.24E-07 | 337159 | 39049   | 1         | risk diff | 1.21E-04 |
| rs35570272 | rs4547648  | 3:33080256_G_A   | Asthma                                                                                        | EFO_0000270                                 | UKBB     | European | -0.004 | 0.001 | 6.74E-07 | 336782 | 38791   | 1         | risk diff | 2.32E-04 |
| rs35570272 | rs4547648  | 3:33080256_G_A   | Wheeze or whistling in the chest in last year                                                 | EFO_0009715                                 | UKBB     | European | -0.004 | 0.001 | 3.68E-05 | 331257 | 68531   | 1         | risk diff | 7.98E-03 |
| rs35570272 | rs4277638  | 3:33080356_A_G   | No blood clot, bronchitis, emphysema, asthma, rhinitis, eczema or allergy diagnosed by doctor | -                                           | UKBB     | European | -0.009 | 0.001 | 4.02E-15 | 336782 | 228530  | 1         | risk diff | 1.02E-11 |
| rs35570272 | rs4277638  | 3:33080356_A_G   | Hayfever, allergic rhinitis or eczema                                                         | EFO_0003956;<br>EFO_0005854;<br>EFO_0000274 | UKBB     | European | 0.007  | 0.001 | 6.07E-11 | 336782 | 77891   | 1         | risk diff | 5.27E-08 |
| rs35570272 | rs4277638  | 3:33080356_A_G   | Sum eosinophil basophil counts                                                                | EFO_0004586                                 | 27863252 | European | 0.023  | 0.004 | 1.06E-09 | 173480 | 0       | 2         | IVNT      | 6.93E-07 |
| rs35570272 | rs4277638  | 3:33080356_A_G   | Neutrophil percentage of granulocytes                                                         | EFO_0004586                                 | 27863252 | European | -0.022 | 0.004 | 3.01E-09 | 173480 | 0       | 2         | IVNT      | 1.74E-06 |
| rs35570272 | rs4277638  | 3:33080356_A_G   | Eosinophil count                                                                              | EFO_0004586                                 | 27863252 | European | 0.022  | 0.004 | 3.33E-09 | 173480 | 0       | 2         | IVNT      | 1.91E-06 |
| rs35570272 | rs4277638  | 3:33080356_A_G   | Eosinophil percentage of white cells                                                          | EFO_0004586                                 | 27863252 | European | 0.021  | 0.004 | 6.23E-09 | 173480 | 0       | 2         | IVNT      | 3.28E-06 |
| rs35570272 | rs4277638  | 3:33080356_A_G   | Eosinophil percentage of granulocytes                                                         | EFO_0004586                                 | 27863252 | European | 0.021  | 0.004 | 1.17E-08 | 173480 | 0       | 2         | IVNT      | 5.90E-06 |
| rs35570272 | rs4277638  | 3:33080356_A_G   | Allergic disease                                                                              | EFO_0003785                                 | 29083406 | European | 0.033  | 0.006 | 3.22E-08 | 360838 | 180129  | 13        | log OR    | 1.50E-05 |
| rs35570272 | rs4277638  | 3:33080356_A_G   | Self-reported asthma                                                                          | EFO_0000270                                 | UKBB     | European | 0.004  | 0.001 | 2.93E-07 | 337159 | 39049   | 1         | risk diff | 1.10E-04 |
| rs35570272 | rs4277638  | 3:33080356_A_G   | Asthma                                                                                        | EFO_0000270                                 | UKBB     | European | 0.004  | 0.001 | 6.12E-07 | 336782 | 38791   | 1         | risk diff | 2.14E-04 |
| rs35570272 | rs4277638  | 3:33080356_A_G   | Wheeze or whistling in the chest in last year                                                 | EFO_0009715                                 | UKBB     | European | 0.004  | 0.001 | 3.39E-05 | 331257 | 68531   | 1         | risk diff | 7.45E-03 |
| rs35570272 | rs4274702  | 3:33080722_T_C   | No blood clot, bronchitis, emphysema, asthma, rhinitis, eczema or allergy diagnosed by doctor | -                                           | UKBB     | European | 0.009  | 0.001 | 3.85E-15 | 336782 | 228530  | 1         | risk diff | 1.01E-11 |
| rs35570272 | rs4274702  | 3:33080722_T_C   | Hayfever, allergic rhinitis or eczema                                                         | EFO_0003956;<br>EFO_0005854;<br>EFO_0000274 | UKBB     | European | -0.007 | 0.001 | 5.56E-11 | 336782 | 77891   | 1         | risk diff | 4.92E-08 |
| rs35570272 | rs4274702  | 3:33080722_T_C   | Sum eosinophil basophil counts                                                                | EFO_0004586                                 | 27863252 | European | -0.022 | 0.004 | 1.43E-09 | 173480 | 0       | 2         | IVNT      | 8.83E-07 |
| rs35570272 | rs4274702  | 3:33080722_T_C   | Neutrophil percentage of granulocytes                                                         | EFO_0004586                                 | 27863252 | European | 0.022  | 0.004 | 3.89E-09 | 173480 | 0       | 2         | IVNT      | 2.14E-06 |
| rs35570272 | rs4274702  | 3:33080722_T_C   | Eosinophil count                                                                              | EFO_0004586                                 | 27863252 | European | -0.022 | 0.004 | 4.45E-09 | 173480 | 0       | 2         | IVNT      | 2.41E-06 |
| rs35570272 | rs4274702  | 3:33080722_T_C   | Eosinophil percentage of white cells                                                          | EFO_0004586                                 | 27863252 | European | -0.021 | 0.004 | 7.99E-09 | 173480 | 0       | 2         | IVNT      | 4.10E-06 |
| rs35570272 | rs4274702  | 3:33080722_T_C   | Eosinophil percentage of granulocytes                                                         | EFO_0004586                                 | 27863252 | European | -0.021 | 0.004 | 1.52E-08 | 173480 | 0       | 2         | IVNT      | 7.47E-06 |
| rs35570272 | rs4274702  | 3:33080722_T_C   | Allergic disease                                                                              | EFO_0003785                                 | 29083406 | European | -0.033 | 0.006 | 2.41E-08 | 360838 | 180129  | 13        | log OR    | 1.15E-05 |
| rs35570272 | rs4274702  | 3:33080722_T_C   | Self-reported asthma                                                                          | EFO_0000270                                 | UKBB     | European | -0.004 | 0.001 | 3.09E-07 | 337159 | 39049   | 1         | risk diff | 1.16E-04 |
| rs35570272 | rs4274702  | 3:33080722_T_C   | Asthma                                                                                        | EFO_0000270                                 | UKBB     | European | -0.004 | 0.001 | 6.46E-07 | 336782 | 38791   | 1         | risk diff | 2.25E-04 |
| rs35570272 | rs4274702  | 3:33080722_T_C   | Wheeze or whistling in the chest in last year                                                 | EFO_0009715                                 | UKBB     | European | -0.004 | 0.001 | 3.46E-05 | 331257 | 68531   | 1         | risk diff | 7.57E-03 |
| rs35570272 | rs6800001  | 3:33081102_A_G   | No blood clot, bronchitis, emphysema, asthma, rhinitis, eczema or allergy diagnosed by doctor | -                                           | UKBB     | European | -0.009 | 0.001 | 3.88E-15 | 336782 | 228530  | 1         | risk diff | 1.01E-11 |

| sentinel   | SNP        | chr_bp_eff_other | trait                                                                                         | efo                                         | pmid     | ancestry   | beta   | se    | p        | n      | n_cases | n_studies | unit      | FDR      |
|------------|------------|------------------|-----------------------------------------------------------------------------------------------|---------------------------------------------|----------|------------|--------|-------|----------|--------|---------|-----------|-----------|----------|
| rs35570272 | rs6800001  | 3:33081102_A_G   | Hayfever, allergic rhinitis or eczema                                                         | EFO_0003956;<br>EFO_0005854;<br>EFO_0000274 | UKBB     | European   | 0.007  | 0.001 | 5.52E-11 | 336782 | 77891   | 1         | risk diff | 4.90E-08 |
| rs35570272 | rs6800001  | 3:33081102_A_G   | Sum eosinophil basophil counts                                                                | EFO_0004586                                 | 27863252 | European   | 0.022  | 0.004 | 1.33E-09 | 173480 | 0       | 2         | IVNT      | 8.36E-07 |
| rs35570272 | rs6800001  | 3:33081102_A_G   | Eosinophil count                                                                              | EFO_0004586                                 | 27863252 | European   | 0.022  | 0.004 | 3.12E-09 | 173480 | 0       | 2         | IVNT      | 1.80E-06 |
| rs35570272 | rs6800001  | 3:33081102_A_G   | Neutrophil percentage of granulocytes                                                         | EFO_0004586                                 | 27863252 | European   | -0.022 | 0.004 | 3.65E-09 | 173480 | 0       | 2         | IVNT      | 2.04E-06 |
| rs35570272 | rs6800001  | 3:33081102_A_G   | Eosinophil percentage of white cells                                                          | EFO_0004586                                 | 27863252 | European   | 0.022  | 0.004 | 5.76E-09 | 173480 | 0       | 2         | IVNT      | 3.04E-06 |
| rs35570272 | rs6800001  | 3:33081102_A_G   | Eosinophil percentage of granulocytes                                                         | EFO_0004586                                 | 27863252 | European   | 0.021  | 0.004 | 1.09E-08 | 173480 | 0       | 2         | IVNT      | 5.49E-06 |
| rs35570272 | rs6800001  | 3:33081102_A_G   | Allergic disease                                                                              | EFO_0003785                                 | 29083406 | European   | 0.033  | 0.006 | 2.28E-08 | 360838 | 180129  | 13        | log OR    | 1.09E-05 |
| rs35570272 | rs6800001  | 3:33081102_A_G   | Self-reported asthma                                                                          | EFO_0000270                                 | UKBB     | European   | 0.004  | 0.001 | 3.24E-07 | 337159 | 39049   | 1         | risk diff | 1.21E-04 |
| rs35570272 | rs6800001  | 3:33081102_A_G   | Asthma                                                                                        | EFO_0000270                                 | UKBB     | European   | 0.004  | 0.001 | 6.51E-07 | 336782 | 38791   | 1         | risk diff | 2.26E-04 |
| rs35570272 | rs6800001  | 3:33081102_A_G   | Wheeze or whistling in the chest in last year                                                 | EFO_0009715                                 | UKBB     | European   | 0.004  | 0.001 | 3.40E-05 | 331257 | 68531   | 1         | risk diff | 7.45E-03 |
| rs35570272 | rs28752078 | 3:33084861_T_C   | No blood clot, bronchitis, emphysema, asthma, rhinitis, eczema or allergy diagnosed by doctor | -                                           | UKBB     | European   | 0.009  | 0.001 | 1.07E-14 | 336782 | 228530  | 1         | risk diff | 2.43E-11 |
| rs35570272 | rs28752078 | 3:33084861_T_C   | Hayfever, allergic rhinitis or eczema                                                         | EFO_0003956;<br>EFO_0005854;<br>EFO_0000274 | UKBB     | European   | -0.006 | 0.001 | 6.97E-10 | 336782 | 77891   | 1         | risk diff | 4.92E-07 |
| rs35570272 | rs28752078 | 3:33084861_T_C   | Self-reported asthma                                                                          | EFO_0000270                                 | UKBB     | European   | -0.004 | 0.001 | 2.66E-08 | 337159 | 39049   | 1         | risk diff | 1.25E-05 |
| rs35570272 | rs28752078 | 3:33084861_T_C   | Sum eosinophil basophil counts                                                                | EFO_0004586                                 | 27863252 | European   | -0.020 | 0.004 | 8.56E-08 | 173480 | 0       | 2         | IVNT      | 3.55E-05 |
| rs35570272 | rs28752078 | 3:33084861_T_C   | Asthma                                                                                        | EFO_0000270                                 | UKBB     | European   | -0.004 | 0.001 | 8.75E-08 | 336782 | 38791   | 1         | risk diff | 3.62E-05 |
| rs35570272 | rs28752078 | 3:33084861_T_C   | Allergic disease                                                                              | EFO_0003785                                 | 29083406 | European   | -0.031 | 0.006 | 1.24E-07 | 360838 | 180129  | 13        | log OR    | 4.96E-05 |
| rs35570272 | rs28752078 | 3:33084861_T_C   | Eosinophil count                                                                              | EFO_0004586                                 | 27863252 | European   | -0.019 | 0.004 | 2.37E-07 | 173480 | 0       | 2         | IVNT      | 9.06E-05 |
| rs35570272 | rs28752078 | 3:33084861_T_C   | Neutrophil percentage of granulocytes                                                         | EFO_0004586                                 | 27863252 | European   | 0.018  | 0.004 | 4.60E-07 | 173480 | 0       | 2         | IVNT      | 1.66E-04 |
| rs35570272 | rs28752078 | 3:33084861_T_C   | Eosinophil percentage of white cells                                                          | EFO_0004586                                 | 27863252 | European   | -0.018 | 0.004 | 1.16E-06 | 173480 | 0       | 2         | IVNT      | 3.73E-04 |
| rs35570272 | rs28752078 | 3:33084861_T_C   | Eosinophil percentage of granulocytes                                                         | EFO_0004586                                 | 27863252 | European   | -0.018 | 0.004 | 1.54E-06 | 173480 | 0       | 2         | IVNT      | 4.80E-04 |
| rs35570272 | rs28752078 | 3:33084861_T_C   | Wheeze or whistling in the chest in last year                                                 | EFO_0009715                                 | UKBB     | European   | -0.005 | 0.001 | 7.18E-06 | 331257 | 68531   | 1         | risk diff | 1.95E-03 |
| rs6787279  | rs74932439 | 3:57115567_T_C   | Forced expiratory volume in 1-second                                                          | EFO_0004314                                 | UKBB     | European   | -0.014 | 0.003 | 5.81E-07 | 307638 | 0       | 1         | IVNT      | 2.05E-04 |
| rs6787279  | rs74932439 | 3:57115567_T_C   | Average weekly beer plus cider intake                                                         | EFO_0004329                                 | UKBB     | European   | 0.012  | 0.003 | 1.37E-05 | 241447 | 0       | 1         | -         | 3.38E-03 |
| rs6787279  | rs74932439 | 3:57115567_T_C   | Hand grip strength right                                                                      | EFO_0006941                                 | UKBB     | European   | -0.010 | 0.002 | 1.52E-05 | 335842 | 0       | 1         | IVNT      | 3.69E-03 |
| rs6787279  | rs74999629 | 3:57117542_A_G   | Forced expiratory volume in 1-second                                                          | EFO_0004314                                 | UKBB     | European   | 0.014  | 0.003 | 6.18E-07 | 307638 | 0       | 1         | IVNT      | 2.16E-04 |
| rs6787279  | rs74999629 | 3:57117542_A_G   | Average weekly beer plus cider intake                                                         | EFO_0004329                                 | UKBB     | European   | -0.012 | 0.003 | 1.34E-05 | 241447 | 0       | 1         | -         | 3.32E-03 |
| rs6787279  | rs74999629 | 3:57117542_A_G   | Hand grip strength right                                                                      | EFO_0006941                                 | UKBB     | European   | 0.010  | 0.002 | 1.42E-05 | 335842 | 0       | 1         | IVNT      | 3.48E-03 |
| rs6787279  | rs59527464 | 3:57122780_T_C   | Forced expiratory volume in 1-second                                                          | EFO_0004314                                 | UKBB     | European   | -0.012 | 0.003 | 6.11E-06 | 307638 | 0       | 1         | IVNT      | 1.68E-03 |
| rs6787279  | rs2035656  | 3:57125101_C_A   | Forced expiratory volume in 1-second                                                          | EFO_0004314                                 | UKBB     | European   | 0.014  | 0.003 | 6.53E-07 | 307638 | 0       | 1         | IVNT      | 2.26E-04 |
| rs6787279  | rs2035656  | 3:57125101_C_A   | Hand grip strength right                                                                      | EFO_0006941                                 | UKBB     | European   | 0.010  | 0.002 | 1.49E-05 | 335842 | 0       | 1         | IVNT      | 3.63E-03 |
| rs6787279  | rs2035656  | 3:57125101_C_A   | Average weekly beer plus cider intake                                                         | EFO_0004329                                 | UKBB     | European   | -0.012 | 0.003 | 1.55E-05 | 241447 | 0       | 1         | -         | 3.76E-03 |
| rs6787279  | rs2035655  | 3:57125202_G_T   | Forced expiratory volume in 1-second                                                          | EFO_0004314                                 | UKBB     | European   | -0.012 | 0.003 | 5.99E-06 | 307638 | 0       | 1         | IVNT      | 1.66E-03 |
| rs6787279  | rs17289035 | 3:57125424_A_G   | Forced expiratory volume in 1-second                                                          | EFO_0004314                                 | UKBB     | European   | 0.012  | 0.003 | 6.39E-06 | 307638 | 0       | 1         | IVNT      | 1.76E-03 |
| rs6787279  | rs12486855 | 3:57125864_G_A   | Forced expiratory volume in 1-second                                                          | EFO_0004314                                 | UKBB     | European   | -0.014 | 0.003 | 8.23E-07 | 307638 | 0       | 1         | IVNT      | 2.79E-04 |
| rs6787279  | rs12486855 | 3:57125864_G_A   | Average weekly beer plus cider intake                                                         | EFO_0004329                                 | UKBB     | European   | 0.012  | 0.003 | 1.30E-05 | 241447 | 0       | 1         | -         | 3.24E-03 |
| rs6787279  | rs12486855 | 3:57125864_G_A   | Hand grip strength right                                                                      | EFO_0006941                                 | UKBB     | European   | -0.010 | 0.002 | 1.41E-05 | 335842 | 0       | 1         | IVNT      | 3.46E-03 |
| rs6787279  | rs17057718 | 3:57136585_T_C   | Cerebrospinal fluid biomarker levels                                                          | EFO_0006794                                 | 28031287 | East Asian | NA     | NA    | 1.00E-11 | -      | -       | -         | -         | 1.05E-08 |
| rs6787279  | rs17057718 | 3:57136585_T_C   | Forced expiratory volume in 1-second                                                          | EFO_0004314                                 | UKBB     | European   | -0.014 | 0.003 | 1.14E-06 | 307638 | 0       | 1         | IVNT      | 3.66E-04 |
| rs6787279  | rs17057718 | 3:57136585_T_C   | Hand grip strength right                                                                      | EFO_0006941                                 | UKBB     | European   | -0.011 | 0.002 | 1.20E-05 | 335842 | 0       | 1         | IVNT      | 3.00E-03 |
| rs6787279  | rs17057718 | 3:57136585_T_C   | Average weekly beer plus cider intake                                                         | EFO_0004329                                 | UKBB     | European   | 0.012  | 0.003 | 2.10E-05 | 241447 | 0       | 1         | -         | 4.94E-03 |
| rs6787279  | rs1075398  | 3:57137596_C_A   | Forced expiratory volume in 1-second                                                          | EFO_0004314                                 | UKBB     | European   | -0.014 | 0.003 | 8.64E-07 | 307638 | 0       | 1         | IVNT      | 2.91E-04 |
| rs6787279  | rs1075398  | 3:57137596_C_A   | Hand grip strength right                                                                      | EFO_0006941                                 | UKBB     | European   | -0.011 | 0.002 | 1.05E-05 | 335842 | 0       | 1         | IVNT      | 2.68E-03 |
| rs6787279  | rs1075398  | 3:57137596_C_A   | Average weekly beer plus cider intake                                                         | EFO_0004329                                 | UKBB     | European   | 0.012  | 0.003 | 2.08E-05 | 241447 | 0       | 1         | -         | 4.91E-03 |
| rs6787279  | rs1077034  | 3:57138228_A_T   | Forced expiratory volume in 1-second                                                          | EFO_0004314                                 | UKBB     | European   | -0.014 | 0.003 | 8.57E-07 | 307638 | 0       | 1         | IVNT      | 2.89E-04 |

| sentinel  | SNP         | chr_bp_eff_other | trait                                                      | efo         | pmid | ancestry | beta   | se    | p        | n      | n_cases | n_studies | unit | FDR      |
|-----------|-------------|------------------|------------------------------------------------------------|-------------|------|----------|--------|-------|----------|--------|---------|-----------|------|----------|
| rs6787279 | rs1077034   | 3:57138228 A T   | Hand grip strength right                                   | EFO_0006941 | UKBB | European | -0.011 | 0.002 | 1.03E-05 | 335842 | 0       | 1         | IVNT | 2.64E-03 |
| rs6787279 | rs1077034   | 3:57138228 A T   | Average weekly beer plus cider intake                      | EFO_0004329 | UKBB | European | 0.012  | 0.003 | 1.93E-05 | 241447 | 0       | 1         | -    | 4.59E-03 |
| rs6787279 | rs76645245  | 3:57140794 G A   | Forced expiratory volume in 1-second                       | EFO_0004314 | UKBB | European | -0.014 | 0.003 | 8.54E-07 | 307638 | 0       | 1         | IVNT | 2.89E-04 |
| rs6787279 | rs76645245  | 3:57140794 G A   | Hand grip strength right                                   | EFO_0006941 | UKBB | European | -0.011 | 0.002 | 1.17E-05 | 335842 | 0       | 1         | IVNT | 2.95E-03 |
| rs6787279 | rs76645245  | 3:57140794 G A   | Average weekly beer plus cider intake                      | EFO_0004329 | UKBB | European | 0.012  | 0.003 | 2.15E-05 | 241447 | 0       | 1         | -    | 5.06E-03 |
| rs6787279 | rs78345417  | 3:57143942 T C   | Forced expiratory volume in 1-second                       | EFO_0004314 | UKBB | European | -0.014 | 0.003 | 9.18E-07 | 307638 | 0       | 1         | IVNT | 3.05E-04 |
| rs6787279 | rs78345417  | 3:57143942 T C   | Hand grip strength right                                   | EFO_0006941 | UKBB | European | -0.011 | 0.002 | 1.15E-05 | 335842 | 0       | 1         | IVNT | 2.91E-03 |
| rs6787279 | rs78345417  | 3:57143942 T C   | Average weekly beer plus cider intake                      | EFO_0004329 | UKBB | European | 0.012  | 0.003 | 2.32E-05 | 241447 | 0       | 1         | -    | 5.41E-03 |
| rs6787279 | rs79932559  | 3:57145726 T C   | Forced expiratory volume in 1-second                       | EFO_0004314 | UKBB | European | -0.014 | 0.003 | 9.15E-07 | 307638 | 0       | 1         | IVNT | 3.05E-04 |
| rs6787279 | rs79932559  | 3:57145726 T C   | Hand grip strength right                                   | EFO_0006941 | UKBB | European | -0.011 | 0.002 | 1.19E-05 | 335842 | 0       | 1         | IVNT | 2.99E-03 |
| rs6787279 | rs79932559  | 3:57145726 T C   | Average weekly beer plus cider intake                      | EFO_0004329 | UKBB | European | 0.012  | 0.003 | 2.24E-05 | 241447 | 0       | 1         | -    | 5.24E-03 |
| rs6787279 | rs77543785  | 3:57148271 T C   | Forced expiratory volume in 1-second                       | EFO_0004314 | UKBB | European | -0.014 | 0.003 | 9.57E-07 | 307638 | 0       | 1         | IVNT | 3.15E-04 |
| rs6787279 | rs77543785  | 3:57148271 T C   | Hand grip strength right                                   | EFO_0006941 | UKBB | European | -0.010 | 0.002 | 1.32E-05 | 335842 | 0       | 1         | IVNT | 3.28E-03 |
| rs6787279 | rs77543785  | 3:57148271 T C   | Average weekly beer plus cider intake                      | EFO_0004329 | UKBB | European | 0.012  | 0.003 | 2.15E-05 | 241447 | 0       | 1         | -    | 5.06E-03 |
| rs6787279 | rs6792236   | 3:57149315 G T   | Forced expiratory volume in 1-second                       | EFO_0004314 | UKBB | European | 0.014  | 0.003 | 9.57E-07 | 307638 | 0       | 1         | IVNT | 3.15E-04 |
| rs6787279 | rs6792236   | 3:57149315 G T   | Hand grip strength right                                   | EFO_0006941 | UKBB | European | 0.010  | 0.002 | 1.26E-05 | 335842 | 0       | 1         | IVNT | 3.16E-03 |
| rs6787279 | rs6792236   | 3:57149315 G T   | Average weekly beer plus cider intake                      | EFO_0004329 | UKBB | European | -0.012 | 0.003 | 2.04E-05 | 241447 | 0       | 1         | -    | 4.82E-03 |
| rs6787279 | rs80095764  | 3:57149793 T C   | Forced expiratory volume in 1-second                       | EFO_0004314 | UKBB | European | 0.014  | 0.003 | 9.31E-07 | 307638 | 0       | 1         | IVNT | 3.09E-04 |
| rs6787279 | rs80095764  | 3:57149793 T C   | Hand grip strength right                                   | EFO_0006941 | UKBB | European | 0.010  | 0.002 | 1.40E-05 | 335842 | 0       | 1         | IVNT | 3.93E-03 |
| rs6787279 | rs80095764  | 3:57149793 T C   | Average weekly beer plus cider intake                      | EFO_0004329 | UKBB | European | -0.012 | 0.003 | 2.21E-05 | 241447 | 0       | 1         | -    | 5.19E-03 |
| rs6787279 | rs1488123   | 3:57151812 A G   | Forced expiratory volume in 1-second                       | EFO_0004314 | UKBB | European | 0.014  | 0.003 | 9.04E-07 | 307638 | 0       | 1         | IVNT | 3.03E-04 |
| rs6787279 | rs1488123   | 3:57151812 A G   | Hand grip strength right                                   | EFO_0006941 | UKBB | European | 0.011  | 0.002 | 1.18E-05 | 335842 | 0       | 1         | IVNT | 2.97E-03 |
| rs6787279 | rs1488123   | 3:57151812 A G   | Average weekly beer plus cider intake                      | EFO_0004329 | UKBB | European | -0.012 | 0.003 | 2.31E-05 | 241447 | 0       | 1         | -    | 5.39E-03 |
| rs6787279 | rs1386832   | 3:57152006 G A   | Forced expiratory volume in 1-second                       | EFO_0004314 | UKBB | European | -0.014 | 0.003 | 9.09E-07 | 307638 | 0       | 1         | IVNT | 3.04E-04 |
| rs6787279 | rs1386832   | 3:57152006 G A   | Hand grip strength right                                   | EFO_0006941 | UKBB | European | -0.011 | 0.002 | 1.16E-05 | 335842 | 0       | 1         | IVNT | 2.94E-03 |
| rs6787279 | rs1386832   | 3:57152006 G A   | Average weekly beer plus cider intake                      | EFO_0004329 | UKBB | European | 0.012  | 0.003 | 2.32E-05 | 241447 | 0       | 1         | -    | 5.40E-03 |
| rs6787279 | rs1386833   | 3:57152041 T C   | Forced expiratory volume in 1-second                       | EFO_0004314 | UKBB | European | -0.013 | 0.003 | 3.87E-06 | 307638 | 0       | 1         | IVNT | 1.11E-03 |
| rs6787279 | rs1386833   | 3:57152041 T C   | Hand grip strength right                                   | EFO_0006941 | UKBB | European | -0.011 | 0.002 | 1.09E-05 | 335842 | 0       | 1         | IVNT | 2.76E-03 |
| rs6787279 | rs1386833   | 3:57152041 T C   | Average weekly beer plus cider intake                      | EFO_0004329 | UKBB | European | 0.012  | 0.003 | 2.40E-05 | 241447 | 0       | 1         | -    | 5.56E-03 |
| rs6787279 | rs747089    | 3:57153869 T C   | Forced expiratory volume in 1-second                       | EFO_0004314 | UKBB | European | -0.014 | 0.003 | 1.03E-06 | 307638 | 0       | 1         | IVNT | 3.37E-04 |
| rs6787279 | rs747089    | 3:57153869 T C   | Hand grip strength right                                   | EFO_0006941 | UKBB | European | -0.011 | 0.002 | 1.04E-05 | 335842 | 0       | 1         | IVNT | 2.67E-03 |
| rs6787279 | rs747089    | 3:57153869 T C   | Average weekly beer plus cider intake                      | EFO_0004329 | UKBB | European | 0.011  | 0.003 | 2.77E-05 | 241447 | 0       | 1         | -    | 6.31E-03 |
| rs6787279 | rs1872942   | 3:57154878 T C   | Forced expiratory volume in 1-second                       | EFO_0004314 | UKBB | European | 0.014  | 0.003 | 1.13E-06 | 307638 | 0       | 1         | IVNT | 3.65E-04 |
| rs6787279 | rs1872942   | 3:57154878 T C   | Hand grip strength right                                   | EFO_0006941 | UKBB | European | 0.011  | 0.002 | 9.17E-06 | 335842 | 0       | 1         | IVNT | 2.40E-03 |
| rs6787279 | rs1872942   | 3:57154878 T C   | Average weekly beer plus cider intake                      | EFO_0004329 | UKBB | European | -0.011 | 0.003 | 2.87E-05 | 241447 | 0       | 1         | -    | 6.49E-03 |
| rs6787279 | rs111888204 | 3:57157978 T C   | Forced expiratory volume in 1-second                       | EFO_0004314 | UKBB | European | -0.014 | 0.003 | 1.45E-06 | 307638 | 0       | 1         | IVNT | 4.55E-04 |
| rs6787279 | rs111888204 | 3:57157978 T C   | Hand grip strength right                                   | EFO_0006941 | UKBB | European | -0.011 | 0.002 | 1.22E-05 | 335842 | 0       | 1         | IVNT | 3.05E-03 |
| rs6787279 | rs111888204 | 3:57157978 T C   | Average weekly beer plus cider intake                      | EFO_0004329 | UKBB | European | 0.011  | 0.003 | 3.06E-05 | 241447 | 0       | 1         | -    | 6.82E-03 |
| rs6787279 | rs6768368   | 3:57162476 T C   | Forced expiratory volume in 1-second                       | EFO_0004314 | UKBB | European | -0.018 | 0.003 | 1.36E-09 | 307638 | 0       | 1         | IVNT | 8.46E-07 |
| rs6787279 | rs6768368   | 3:57162476 T_C   | Forced expiratory volume in 1-second, best measure         | EFO_0004314 | UKBB | European | -0.018 | 0.003 | 1.05E-07 | 255492 | 0       | 1         | IVNT | 4.30E-05 |
| rs6787279 | rs6768368   | 3:57162476 T_C   | Forced vital capacity                                      | EFO_0004312 | UKBB | European | -0.014 | 0.003 | 2.10E-06 | 307638 | 0       | 1         | IVNT | 6.44E-04 |
| rs6787279 | rs6768368   | 3:57162476 T_C   | Forced vital capacity, best measure                        | EFO_0004312 | UKBB | European | -0.014 | 0.003 | 1.18E-05 | 255492 | 0       | 1         | IVNT | 2.98E-03 |
| rs6787279 | rs6787279   | 3:57163751 C T   | Forced expiratory volume in 1-second                       | EFO_0004314 | UKBB | European | 0.017  | 0.003 | 3.74E-09 | 307638 | 0       | 1         | IVNT | 2.07E-06 |
| rs6787279 | rs6787279   | 3:57163751_C_T   | Forced expiratory volume in 1-second, best measure         | EFO_0004314 | UKBB | European | 0.017  | 0.003 | 1.33E-08 | 255492 | 0       | 1         | IVNT | 6.56E-06 |
| rs6787279 | rs6787279   | 3:57163751_C_T   | Forced expiratory volume in 1-second, predicted percentage | EFO_0004314 | UKBB | European | 0.027  | 0.006 | 2.37E-06 | 110423 | 0       | 1         | IVNT | 7.16E-04 |
| rs6787279 | rs6787279   | 3:57163751 C T   | Forced vital capacity                                      | EFO_0004312 | UKBB | European | 0.011  | 0.003 | 1.65E-05 | 307638 | 0       | 1         | IVNT | 3.98E-03 |

| sentinel  | SNP        | chr_bp_eff_other | trait                                                      | efo         | pmid | ancestry | beta   | se    | p        | n      | n_cases | n_studies | unit | FDR      |
|-----------|------------|------------------|------------------------------------------------------------|-------------|------|----------|--------|-------|----------|--------|---------|-----------|------|----------|
| rs6787279 | rs6787279  | 3:57163751_C_T   | Forced vital capacity, best measure                        | EFO_0004312 | UKBB | European | 0.012  | 0.003 | 2.04E-05 | 255492 | 0       | 1         | IVNT | 4.83E-03 |
| rs6787279 | rs6772089  | 3:57163765_T_C   | Forced expiratory volume in 1-second                       | EFO_0004314 | UKBB | European | -0.018 | 0.003 | 1.41E-09 | 307638 | 0       | 1         | IVNT | 8.71E-07 |
| rs6787279 | rs6772089  | 3:57163765_T_C   | Forced expiratory volume in 1-second, best measure         | EFO_0004314 | UKBB | European | -0.018 | 0.003 | 1.05E-07 | 255492 | 0       | 1         | IVNT | 4.28E-05 |
| rs6787279 | rs6772089  | 3:57163765_T_C   | Forced vital capacity                                      | EFO_0004312 | UKBB | European | -0.014 | 0.003 | 2.19E-06 | 307638 | 0       | 1         | IVNT | 6.66E-04 |
| rs6787279 | rs6772089  | 3:57163765_T_C   | Forced vital capacity, best measure                        | EFO_0004312 | UKBB | European | -0.014 | 0.003 | 1.20E-05 | 255492 | 0       | 1         | IVNT | 3.00E-03 |
| rs6787279 | rs6796041  | 3:57163887_T_G   | Forced vital capacity, best measure                        | EFO_0004314 | UKBB | European | -0.019 | 0.003 | 8.72E-10 | 307638 | 0       | 1         | IVNT | 5.97E-07 |
| rs6787279 | rs6796041  | 3:57163887_T_G   | Forced expiratory volume in 1-second, best measure         | EFO_0004314 | UKBB | European | -0.018 | 0.003 | 7.16E-08 | 255492 | 0       | 1         | IVNT | 3.07E-05 |
| rs6787279 | rs6796041  | 3:57163887_T_G   | Forced vital capacity                                      | EFO_0004312 | UKBB | European | -0.014 | 0.003 | 1.49E-06 | 307638 | 0       | 1         | IVNT | 4.68E-04 |
| rs6787279 | rs6796041  | 3:57163887_T_G   | Forced vital capacity, best measure                        | EFO_0004312 | UKBB | European | -0.014 | 0.003 | 8.30E-06 | 255492 | 0       | 1         | IVNT | 2.20E-03 |
| rs6787279 | rs6775080  | 3:57164362_T_C   | Forced expiratory volume in 1-second                       | EFO_0004314 | UKBB | European | -0.018 | 0.003 | 1.38E-09 | 307638 | 0       | 1         | IVNT | 8.57E-07 |
| rs6787279 | rs6775080  | 3:57164362_T_C   | Forced expiratory volume in 1-second, best measure         | EFO_0004314 | UKBB | European | -0.018 | 0.003 | 1.04E-07 | 255492 | 0       | 1         | IVNT | 4.26E-05 |
| rs6787279 | rs6775080  | 3:57164362_T_C   | Forced vital capacity                                      | EFO_0004312 | UKBB | European | -0.014 | 0.003 | 2.14E-06 | 307638 | 0       | 1         | IVNT | 6.54E-04 |
| rs6787279 | rs6775080  | 3:57164362_T_C   | Forced vital capacity, best measure                        | EFO_0004312 | UKBB | European | -0.014 | 0.003 | 1.19E-05 | 255492 | 0       | 1         | IVNT | 2.99E-03 |
| rs6787279 | rs6787775  | 3:57164408_T_A   | Forced expiratory volume in 1-second                       | EFO_0004314 | UKBB | European | -0.018 | 0.003 | 1.38E-09 | 307638 | 0       | 1         | IVNT | 8.59E-07 |
| rs6787279 | rs6787775  | 3:57164408_T_A   | Forced expiratory volume in 1-second, best measure         | EFO_0004314 | UKBB | European | -0.018 | 0.003 | 1.07E-07 | 255492 | 0       | 1         | IVNT | 4.35E-05 |
| rs6787279 | rs6787775  | 3:57164408_T_A   | Forced vital capacity                                      | EFO_0004312 | UKBB | European | -0.014 | 0.003 | 2.15E-06 | 307638 | 0       | 1         | IVNT | 6.56E-04 |
| rs6787279 | rs6787775  | 3:57164408_T_A   | Forced vital capacity, best measure                        | EFO_0004312 | UKBB | European | -0.014 | 0.003 | 1.22E-05 | 255492 | 0       | 1         | IVNT | 3.05E-03 |
| rs6787279 | rs34313207 | 3:57164929_A_G   | Forced expiratory volume in 1-second                       | EFO_0004314 | UKBB | European | 0.019  | 0.003 | 7.96E-10 | 307638 | 0       | 1         | IVNT | 5.51E-07 |
| rs6787279 | rs34313207 | 3:57164929_A_G   | Forced expiratory volume in 1-second, best measure         | EFO_0004314 | UKBB | European | 0.018  | 0.003 | 6.64E-08 | 255492 | 0       | 1         | IVNT | 2.87E-05 |
| rs6787279 | rs34313207 | 3:57164929_A_G   | Forced vital capacity                                      | EFO_0004312 | UKBB | European | 0.014  | 0.003 | 1.35E-06 | 307638 | 0       | 1         | IVNT | 4.30E-04 |
| rs6787279 | rs34313207 | 3:57164929_A_G   | Forced vital capacity, best measure                        | EFO_0004312 | UKBB | European | 0.014  | 0.003 | 7.56E-06 | 255492 | 0       | 1         | IVNT | 2.04E-03 |
| rs6787279 | rs4681957  | 3:57165310_A_C   | Forced expiratory volume in 1-second                       | EFO_0004314 | UKBB | European | 0.019  | 0.003 | 1.27E-09 | 307638 | 0       | 1         | IVNT | 8.02E-07 |
| rs6787279 | rs4681957  | 3:57165310_A_C   | Forced expiratory volume in 1-second, best measure         | EFO_0004314 | UKBB | European | 0.018  | 0.003 | 9.62E-08 | 255492 | 0       | 1         | IVNT | 3.96E-05 |
| rs6787279 | rs4681957  | 3:57165310_A_C   | Forced vital capacity                                      | EFO_0004312 | UKBB | European | 0.014  | 0.003 | 1.96E-06 | 307638 | 0       | 1         | IVNT | 6.02E-04 |
| rs6787279 | rs4681957  | 3:57165310_A_C   | Forced vital capacity, best measure                        | EFO_0004312 | UKBB | European | 0.014  | 0.003 | 1.09E-05 | 255492 | 0       | 1         | IVNT | 2.76E-03 |
| rs6787279 | rs6803905  | 3:57168273_C_T   | Forced expiratory volume in 1-second                       | EFO_0004314 | UKBB | European | 0.017  | 0.003 | 3.75E-09 | 307638 | 0       | 1         | IVNT | 2.07E-06 |
| rs6787279 | rs6803905  | 3:57168273_C_T   | Forced expiratory volume in 1-second, best measure         | EFO_0004314 | UKBB | European | 0.017  | 0.003 | 1.33E-08 | 255492 | 0       | 1         | IVNT | 6.56E-06 |
| rs6787279 | rs6803905  | 3:57168273_C_T   | Forced expiratory volume in 1-second, predicted percentage | EFO_0004314 | UKBB | European | 0.027  | 0.006 | 2.41E-06 | 110423 | 0       | 1         | IVNT | 7.28E-04 |
| rs6787279 | rs6803905  | 3:57168273_C_T   | Forced vital capacity                                      | EFO_0004312 | UKBB | European | 0.011  | 0.003 | 1.65E-05 | 307638 | 0       | 1         | IVNT | 3.98E-03 |
| rs6787279 | rs6803905  | 3:57168273_C_T   | Forced vital capacity, best measure                        | EFO_0004312 | UKBB | European | 0.012  | 0.003 | 2.02E-05 | 255492 | 0       | 1         | IVNT | 4.80E-03 |
| rs6787279 | rs6788981  | 3:57168341_T_C   | Forced expiratory volume in 1-second                       | EFO_0004314 | UKBB | European | -0.019 | 0.003 | 8.24E-10 | 307638 | 0       | 1         | IVNT | 5.67E-07 |
| rs6787279 | rs6788981  | 3:57168341_T_C   | Forced expiratory volume in 1-second, best measure         | EFO_0004314 | UKBB | European | -0.018 | 0.003 | 6.83E-08 | 255492 | 0       | 1         | IVNT | 2.94E-05 |
| rs6787279 | rs6788981  | 3:57168341_T_C   | Forced vital capacity                                      | EFO_0004312 | UKBB | European | -0.014 | 0.003 | 1.41E-06 | 307638 | 0       | 1         | IVNT | 4.46E-04 |
| rs6787279 | rs6788981  | 3:57168341_T_C   | Forced vital capacity, best measure                        | EFO_0004312 | UKBB | European | -0.014 | 0.003 | 7.90E-06 | 255492 | 0       | 1         | IVNT | 2.10E-03 |
| rs6787279 | rs56164953 | 3:57168793_A_G   | Forced expiratory volume in 1-second                       | EFO_0004314 | UKBB | European | 0.019  | 0.003 | 8.09E-10 | 307638 | 0       | 1         | IVNT | 5.58E-07 |
| rs6787279 | rs56164953 | 3:57168793_A_G   | Forced expiratory volume in 1-second, best measure         | EFO_0004314 | UKBB | European | 0.018  | 0.003 | 6.60E-08 | 255492 | 0       | 1         | IVNT | 2.86E-05 |
| rs6787279 | rs56164953 | 3:57168793_A_G   | Forced vital capacity                                      | EFO_0004312 | UKBB | European | 0.014  | 0.003 | 1.41E-06 | 307638 | 0       | 1         | IVNT | 4.46E-04 |
| rs6787279 | rs56164953 | 3:57168793_A_G   | Forced vital capacity, best measure                        | EFO_0004312 | UKBB | European | 0.014  | 0.003 | 7.80E-06 | 255492 | 0       | 1         | IVNT | 2.08E-03 |
| rs6787279 | rs6807593  | 3:57169648_C_T   | Forced expiratory volume in 1-second                       | EFO_0004314 | UKBB | European | 0.018  | 0.003 | 1.58E-09 | 307638 | 0       | 1         | IVNT | 9.60E-07 |

| sentinel  | SNP        | chr_bp_eff_other | trait                                                      | efo         | pmid | ancestry | beta   | se    | p        | n      | n_cases | n_studies | unit | FDR      |
|-----------|------------|------------------|------------------------------------------------------------|-------------|------|----------|--------|-------|----------|--------|---------|-----------|------|----------|
| rs6787279 | rs6807593  | 3:57169648_C_T   | Forced expiratory volume in 1-second, best measure         | EFO_0004314 | UKBB | European | 0.018  | 0.003 | 1.09E-07 | 255492 | 0       | 1         | IVNT | 4.44E-05 |
| rs6787279 | rs6807593  | 3:57169648_C_T   | Forced vital capacity                                      | EFO_0004312 | UKBB | European | 0.014  | 0.003 | 2.73E-06 | 307638 | 0       | 1         | IVNT | 8.18E-04 |
| rs6787279 | rs6807593  | 3:57169648_C_T   | Forced vital capacity, best measure                        | EFO_0004312 | UKBB | European | 0.014  | 0.003 | 1.28E-05 | 255492 | 0       | 1         | IVNT | 3.20E-03 |
| rs6787279 | rs1488121  | 3:57170495_C_G   | Forced expiratory volume in 1-second                       | EFO_0004314 | UKBB | European | 0.019  | 0.003 | 9.97E-10 | 307638 | 0       | 1         | IVNT | 6.62E-07 |
| rs6787279 | rs1488121  | 3:57170495_C_G   | Forced expiratory volume in 1-second, best measure         | EFO_0004314 | UKBB | European | 0.018  | 0.003 | 8.19E-08 | 255492 | 0       | 1         | IVNT | 3.42E-05 |
| rs6787279 | rs1488121  | 3:57170495_C_G   | Forced vital capacity                                      | EFO_0004312 | UKBB | European | 0.014  | 0.003 | 1.81E-06 | 307638 | 0       | 1         | IVNT | 5.60E-04 |
| rs6787279 | rs1488121  | 3:57170495_C_G   | Forced vital capacity, best measure                        | EFO_0004312 | UKBB | European | 0.014  | 0.003 | 9.18E-06 | 255492 | 0       | 1         | IVNT | 2.40E-03 |
| rs6787279 | rs6774301  | 3:57171554_C_G   | Forced expiratory volume in 1-second                       | EFO_0004314 | UKBB | European | 0.018  | 0.003 | 1.59E-09 | 307638 | 0       | 1         | IVNT | 9.65E-07 |
| rs6787279 | rs6774301  | 3:57171554_C_G   | Forced expiratory volume in 1-second, best measure         | EFO_0004314 | UKBB | European | 0.018  | 0.003 | 1.15E-07 | 255492 | 0       | 1         | IVNT | 4.64E-05 |
| rs6787279 | rs6774301  | 3:57171554_C_G   | Forced vital capacity                                      | EFO_0004312 | UKBB | European | 0.014  | 0.003 | 2.74E-06 | 307638 | 0       | 1         | IVNT | 8.18E-04 |
| rs6787279 | rs6774301  | 3:57171554_C_G   | Forced vital capacity, best measure                        | EFO_0004312 | UKBB | European | 0.014  | 0.003 | 1.32E-05 | 255492 | 0       | 1         | IVNT | 3.26E-03 |
| rs6787279 | rs6445858  | 3:57171902_C_T   | Forced expiratory volume in 1-second                       | EFO_0004314 | UKBB | European | 0.019  | 0.003 | 9.81E-10 | 307638 | 0       | 1         | IVNT | 6.55E-07 |
| rs6787279 | rs6445858  | 3:57171902_C_T   | Forced expiratory volume in 1-second, best measure         | EFO_0004314 | UKBB | European | 0.018  | 0.003 | 7.61E-08 | 255492 | 0       | 1         | IVNT | 3.22E-05 |
| rs6787279 | rs6445858  | 3:57171902_C_T   | Forced vital capacity                                      | EFO_0004312 | UKBB | European | 0.014  | 0.003 | 1.82E-06 | 307638 | 0       | 1         | IVNT | 5.63E-04 |
| rs6787279 | rs6445858  | 3:57171902_C_T   | Forced vital capacity, best measure                        | EFO_0004312 | UKBB | European | 0.014  | 0.003 | 8.70E-06 | 255492 | 0       | 1         | IVNT | 2.30E-03 |
| rs6787279 | rs79625814 | 3:57173021_T_A   | Forced expiratory volume in 1-second                       | EFO_0004314 | UKBB | European | -0.019 | 0.003 | 9.39E-10 | 307638 | 0       | 1         | IVNT | 6.31E-07 |
| rs6787279 | rs79625814 | 3:57173021_T_A   | Forced expiratory volume in 1-second, best measure         | EFO_0004314 | UKBB | European | -0.018 | 0.003 | 7.19E-08 | 255492 | 0       | 1         | IVNT | 3.07E-05 |
| rs6787279 | rs79625814 | 3:57173021_T_A   | Forced vital capacity                                      | EFO_0004312 | UKBB | European | -0.014 | 0.003 | 1.64E-06 | 307638 | 0       | 1         | IVNT | 5.12E-04 |
| rs6787279 | rs79625814 | 3:57173021_T_A   | Forced vital capacity, best measure                        | EFO_0004312 | UKBB | European | -0.014 | 0.003 | 8.42E-06 | 255492 | 0       | 1         | IVNT | 2.23E-03 |
| rs6787279 | rs1906504  | 3:57175454_G_A   | Forced expiratory volume in 1-second                       | EFO_0004314 | UKBB | European | -0.018 | 0.003 | 1.57E-09 | 307638 | 0       | 1         | IVNT | 9.59E-07 |
| rs6787279 | rs1906504  | 3:57175454_G_A   | Forced expiratory volume in 1-second, best measure         | EFO_0004314 | UKBB | European | -0.018 | 0.003 | 1.16E-07 | 255492 | 0       | 1         | IVNT | 4.68E-05 |
| rs6787279 | rs1906504  | 3:57175454_G_A   | Forced vital capacity                                      | EFO_0004312 | UKBB | European | -0.014 | 0.003 | 2.60E-06 | 307638 | 0       | 1         | IVNT | 7.81E-04 |
| rs6787279 | rs1906504  | 3:57175454_G_A   | Forced vital capacity, best measure                        | EFO_0004312 | UKBB | European | -0.014 | 0.003 | 1.29E-05 | 255492 | 0       | 1         | IVNT | 3.22E-03 |
| rs6787279 | rs1386828  | 3:57176197_A_G   | Forced expiratory volume in 1-second                       | EFO_0004314 | UKBB | European | 0.019  | 0.003 | 9.85E-10 | 307638 | 0       | 1         | IVNT | 6.55E-07 |
| rs6787279 | rs1386828  | 3:57176197_A_G   | Forced expiratory volume in 1-second, best measure         | EFO_0004314 | UKBB | European | 0.018  | 0.003 | 8.20E-08 | 255492 | 0       | 1         | IVNT | 3.42E-05 |
| rs6787279 | rs1386828  | 3:57176197_A_G   | Forced vital capacity                                      | EFO_0004312 | UKBB | European | 0.014  | 0.003 | 1.81E-06 | 307638 | 0       | 1         | IVNT | 5.59E-04 |
| rs6787279 | rs1386828  | 3:57176197_A_G   | Forced vital capacity, best measure                        | EFO_0004312 | UKBB | European | 0.014  | 0.003 | 9.27E-06 | 255492 | 0       | 1         | IVNT | 2.42E-03 |
| rs6787279 | rs1386829  | 3:57176505_G_A   | Forced expiratory volume in 1-second                       | EFO_0004314 | UKBB | European | -0.019 | 0.003 | 9.83E-10 | 307638 | 0       | 1         | IVNT | 6.55E-07 |
| rs6787279 | rs1386829  | 3:57176505_G_A   | Forced expiratory volume in 1-second, best measure         | EFO_0004314 | UKBB | European | -0.018 | 0.003 | 8.19E-08 | 255492 | 0       | 1         | IVNT | 3.42E-05 |
| rs6787279 | rs1386829  | 3:57176505_G_A   | Forced vital capacity                                      | EFO_0004312 | UKBB | European | -0.014 | 0.003 | 1.81E-06 | 307638 | 0       | 1         | IVNT | 5.59E-04 |
| rs6787279 | rs1386829  | 3:57176505_G_A   | Forced vital capacity, best measure                        | EFO_0004312 | UKBB | European | -0.014 | 0.003 | 9.29E-06 | 255492 | 0       | 1         | IVNT | 2.42E-03 |
| rs6787279 | rs12496376 | 3:57177171_G_A   | Forced expiratory volume in 1-second                       | EFO_0004314 | UKBB | European | -0.018 | 0.003 | 1.68E-09 | 307638 | 0       | 1         | IVNT | 1.00E-06 |
| rs6787279 | rs12496376 | 3:57177171_G_A   | Forced expiratory volume in 1-second, best measure         | EFO_0004314 | UKBB | European | -0.018 | 0.003 | 1.23E-07 | 255492 | 0       | 1         | IVNT | 4.94E-05 |
| rs6787279 | rs12496376 | 3:57177171_G_A   | Forced vital capacity                                      | EFO_0004312 | UKBB | European | -0.014 | 0.003 | 2.70E-06 | 307638 | 0       | 1         | IVNT | 8.10E-04 |
| rs6787279 | rs12496376 | 3:57177171_G_A   | Forced vital capacity, best measure                        | EFO_0004312 | UKBB | European | -0.014 | 0.003 | 1.37E-05 | 255492 | 0       | 1         | IVNT | 3.38E-03 |
| rs6787279 | rs6801574  | 3:57177195_T_C   | Forced expiratory volume in 1-second                       | EFO_0004314 | UKBB | European | -0.016 | 0.003 | 4.37E-09 | 307638 | 0       | 1         | IVNT | 2.37E-06 |
| rs6787279 | rs6801574  | 3:57177195_T_C   | Forced expiratory volume in 1-second, best measure         | EFO_0004314 | UKBB | European | -0.017 | 0.003 | 1.60E-08 | 255492 | 0       | 1         | IVNT | 7.82E-06 |
| rs6787279 | rs6801574  | 3:57177195_T_C   | Forced expiratory volume in 1-second, predicted percentage | EFO_0004314 | UKBB | European | -0.027 | 0.006 | 3.42E-06 | 110423 | 0       | 1         | IVNT | 9.92E-04 |

| sentinel  | SNP        | chr_bp_eff_other | trait                                                      | efo         | pmid | ancestry | beta   | se    | p        | n      | n_cases | n_studies | unit | FDR      |
|-----------|------------|------------------|------------------------------------------------------------|-------------|------|----------|--------|-------|----------|--------|---------|-----------|------|----------|
| rs6787279 | rs6801574  | 3:57177195_T_C   | Forced vital capacity                                      | EFO_0004312 | UKBB | European | -0.011 | 0.003 | 1.99E-05 | 307638 | 0       | 1         | IVNT | 4.72E-03 |
| rs6787279 | rs6801574  | 3:57177195_T_C   | Forced vital capacity, best measure                        | EFO_0004312 | UKBB | European | -0.012 | 0.003 | 2.33E-05 | 255492 | 0       | 1         | IVNT | 5.42E-03 |
| rs6787279 | rs76208275 | 3:57177716_C_T   | Forced expiratory volume in 1-second                       | EFO_0004314 | UKBB | European | 0.018  | 0.003 | 1.52E-09 | 307638 | 0       | 1         | IVNT | 9.32E-07 |
| rs6787279 | rs76208275 | 3:57177716_C_T   | Forced expiratory volume in 1-second, best measure         | EFO_0004314 | UKBB | European | 0.018  | 0.003 | 1.12E-07 | 255492 | 0       | 1         | IVNT | 4.53E-05 |
| rs6787279 | rs76208275 | 3:57177716_C_T   | Forced vital capacity                                      | EFO_0004312 | UKBB | European | 0.014  | 0.003 | 2.55E-06 | 307638 | 0       | 1         | IVNT | 7.67E-04 |
| rs6787279 | rs76208275 | 3:57177716_C_T   | Forced vital capacity, best measure                        | EFO_0004312 | UKBB | European | 0.014  | 0.003 | 1.28E-05 | 255492 | 0       | 1         | IVNT | 3.20E-03 |
| rs6787279 | rs12494525 | 3:57178293_T_C   | Forced expiratory volume in 1-second                       | EFO_0004314 | UKBB | European | -0.018 | 0.003 | 1.64E-09 | 307638 | 0       | 1         | IVNT | 9.80E-07 |
| rs6787279 | rs12494525 | 3:57178293_T_C   | Forced expiratory volume in 1-second, best measure         | EFO_0004314 | UKBB | European | -0.018 | 0.003 | 1.17E-07 | 255492 | 0       | 1         | IVNT | 4.70E-05 |
| rs6787279 | rs12494525 | 3:57178293_T_C   | Forced vital capacity                                      | EFO_0004312 | UKBB | European | -0.014 | 0.003 | 2.50E-06 | 307638 | 0       | 1         | IVNT | 7.54E-04 |
| rs6787279 | rs12494525 | 3:57178293_T_C   | Forced vital capacity, best measure                        | EFO_0004312 | UKBB | European | -0.014 | 0.003 | 1.37E-05 | 255492 | 0       | 1         | IVNT | 3.37E-03 |
| rs6787279 | rs6808185  | 3:57179261_G_C   | Forced expiratory volume in 1-second                       | EFO_0004314 | UKBB | European | -0.019 | 0.003 | 8.48E-10 | 307638 | 0       | 1         | IVNT | 5.82E-07 |
| rs6787279 | rs6808185  | 3:57179261_G_C   | Forced expiratory volume in 1-second, best measure         | EFO_0004314 | UKBB | European | -0.018 | 0.003 | 7.21E-08 | 255492 | 0       | 1         | IVNT | 3.08E-05 |
| rs6787279 | rs6808185  | 3:57179261_G_C   | Forced vital capacity                                      | EFO_0004312 | UKBB | European | -0.014 | 0.003 | 1.44E-06 | 307638 | 0       | 1         | IVNT | 4.54E-04 |
| rs6787279 | rs6808185  | 3:57179261_G_C   | Forced vital capacity, best measure                        | EFO_0004312 | UKBB | European | -0.014 | 0.003 | 8.31E-06 | 255492 | 0       | 1         | IVNT | 2.20E-03 |
| rs6787279 | rs17057784 | 3:57180402_A_C   | Forced expiratory volume in 1-second                       | EFO_0004314 | UKBB | European | 0.019  | 0.003 | 1.09E-09 | 307638 | 0       | 1         | IVNT | 7.11E-07 |
| rs6787279 | rs17057784 | 3:57180402_A_C   | Forced expiratory volume in 1-second, best measure         | EFO_0004314 | UKBB | European | 0.018  | 0.003 | 6.93E-08 | 255492 | 0       | 1         | IVNT | 2.98E-05 |
| rs6787279 | rs17057784 | 3:57180402_A_C   | Forced vital capacity                                      | EFO_0004312 | UKBB | European | 0.014  | 0.003 | 1.74E-06 | 307638 | 0       | 1         | IVNT | 5.40E-04 |
| rs6787279 | rs17057784 | 3:57180402_A_C   | Forced vital capacity, best measure                        | EFO_0004312 | UKBB | European | 0.014  | 0.003 | 7.41E-06 | 255492 | 0       | 1         | IVNT | 2.00E-03 |
| rs6787279 | rs9823843  | 3:57181631_C_T   | Forced expiratory volume in 1-second                       | EFO_0004314 | UKBB | European | 0.019  | 0.003 | 1.05E-09 | 307638 | 0       | 1         | IVNT | 6.89E-07 |
| rs6787279 | rs9823843  | 3:57181631_C_T   | Forced expiratory volume in 1-second, best measure         | EFO_0004314 | UKBB | European | 0.018  | 0.003 | 8.07E-08 | 255492 | 0       | 1         | IVNT | 3.38E-05 |
| rs6787279 | rs9823843  | 3:57181631_C_T   | Forced vital capacity                                      | EFO_0004312 | UKBB | European | 0.014  | 0.003 | 1.96E-06 | 307638 | 0       | 1         | IVNT | 6.04E-04 |
| rs6787279 | rs9823843  | 3:57181631_C_T   | Forced vital capacity, best measure                        | EFO_0004312 | UKBB | European | 0.014  | 0.003 | 9.24E-06 | 255492 | 0       | 1         | IVNT | 2.42E-03 |
| rs6787279 | rs17216900 | 3:57183877_C_T   | Forced expiratory volume in 1-second                       | EFO_0004314 | UKBB | European | 0.017  | 0.003 | 3.63E-09 | 307638 | 0       | 1         | IVNT | 2.03E-06 |
| rs6787279 | rs17216900 | 3:57183877_C_T   | Forced expiratory volume in 1-second, best measure         | EFO_0004314 | UKBB | European | 0.018  | 0.003 | 1.01E-08 | 255492 | 0       | 1         | IVNT | 5.15E-06 |
| rs6787279 | rs17216900 | 3:57183877_C_T   | Forced expiratory volume in 1-second, predicted percentage | EFO_0004314 | UKBB | European | 0.026  | 0.006 | 5.08E-06 | 110423 | 0       | 1         | IVNT | 1.42E-03 |
| rs6787279 | rs17216900 | 3:57183877_C_T   | Forced vital capacity, best measure                        | EFO_0004312 | UKBB | European | 0.013  | 0.003 | 1.57E-05 | 255492 | 0       | 1         | IVNT | 3.82E-03 |
| rs6787279 | rs17216900 | 3:57183877_C_T   | Forced vital capacity                                      | EFO_0004312 | UKBB | European | 0.011  | 0.003 | 1.64E-05 | 307638 | 0       | 1         | IVNT | 3.95E-03 |
| rs6787279 | rs4475007  | 3:57186159_G_A   | Forced expiratory volume in 1-second, best measure         | EFO_0004314 | UKBB | European | -0.012 | 0.003 | 5.56E-06 | 255492 | 0       | 1         | IVNT | 1.54E-03 |
| rs6787279 | rs3968279  | 3:57187078_C_T   | Forced expiratory volume in 1-second                       | EFO_0004314 | UKBB | European | -0.018 | 0.003 | 1.50E-08 | 307638 | 0       | 1         | IVNT | 7.38E-06 |
| rs6787279 | rs3968279  | 3:57187078_C_T   | Forced expiratory volume in 1-second, best measure         | EFO_0004314 | UKBB | European | -0.019 | 0.004 | 7.99E-08 | 255492 | 0       | 1         | IVNT | 3.35E-05 |
| rs6787279 | rs3968279  | 3:57187078_C_T   | Forced expiratory volume in 1-second, predicted percentage | EFO_0004314 | UKBB | European | -0.031 | 0.007 | 2.40E-06 | 110423 | 0       | 1         | IVNT | 7.26E-04 |
| rs6787279 | rs9823220  | 3:57190211_T_G   | Forced expiratory volume in 1-second                       | EFO_0004314 | UKBB | European | -0.018 | 0.003 | 3.23E-08 | 307638 | 0       | 1         | IVNT | 1.50E-05 |
| rs6787279 | rs9823220  | 3:57190211_T_G   | Forced expiratory volume in 1-second, best measure         | EFO_0004314 | UKBB | European | -0.018 | 0.004 | 1.76E-07 | 255492 | 0       | 1         | IVNT | 6.85E-05 |
| rs6787279 | rs9823220  | 3:57190211_T_G   | Forced expiratory volume in 1-second, predicted percentage | EFO_0004314 | UKBB | European | -0.031 | 0.007 | 2.92E-06 | 110423 | 0       | 1         | IVNT | 8.67E-04 |
| rs6787279 | rs7431253  | 3:57190452_G_A   | Forced expiratory volume in 1-second                       | EFO_0004314 | UKBB | European | -0.018 | 0.003 | 2.46E-08 | 307638 | 0       | 1         | IVNT | 1.17E-05 |
| rs6787279 | rs7431253  | 3:57190452_G_A   | Forced expiratory volume in 1-second, best measure         | EFO_0004314 | UKBB | European | -0.019 | 0.004 | 1.35E-07 | 255492 | 0       | 1         | IVNT | 5.37E-05 |



| sentinel   | SNP         | chr_bp_eff_other | trait                                                                                         | efo                                         | pmid     | ancestry | beta   | se    | p        | n      | n_cases | n_studies | unit      | FDR      |
|------------|-------------|------------------|-----------------------------------------------------------------------------------------------|---------------------------------------------|----------|----------|--------|-------|----------|--------|---------|-----------|-----------|----------|
| rs6787279  | rs7431253   | 3:57190452_G_A   | Forced expiratory volume in 1-second, predicted percentage                                    | EFO_0004314                                 | UKBB     | European | -0.031 | 0.007 | 3.01E-06 | 110423 | 0       | 1         | IVNT      | 8.89E-04 |
| rs6787279  | rs35424480  | 3:57190811_C_G   | Forced expiratory volume in 1-second                                                          | EFO_0004314                                 | UKBB     | European | 0.018  | 0.003 | 2.51E-08 | 307638 | 0       | 1         | IVNT      | 1.19E-05 |
| rs6787279  | rs35424480  | 3:57190811_C_G   | Forced expiratory volume in 1-second, best measure                                            | EFO_0004314                                 | UKBB     | European | 0.019  | 0.004 | 1.55E-07 | 255492 | 0       | 1         | IVNT      | 6.11E-05 |
| rs6787279  | rs35424480  | 3:57190811_C_G   | Forced expiratory volume in 1-second, predicted percentage                                    | EFO_0004314                                 | UKBB     | European | 0.031  | 0.007 | 2.94E-06 | 110423 | 0       | 1         | IVNT      | 8.73E-04 |
| rs6787279  | rs1906505   | 3:57194272_T_C   | Forced expiratory volume in 1-second                                                          | EFO_0004314                                 | UKBB     | European | -0.018 | 0.003 | 3.71E-08 | 307638 | 0       | 1         | IVNT      | 1.70E-05 |
| rs6787279  | rs1906505   | 3:57194272_T_C   | Forced expiratory volume in 1-second, best measure                                            | EFO_0004314                                 | UKBB     | European | -0.018 | 0.004 | 2.04E-07 | 255492 | 0       | 1         | IVNT      | 7.90E-05 |
| rs6787279  | rs1906505   | 3:57194272_T_C   | Forced expiratory volume in 1-second, predicted percentage                                    | EFO_0004314                                 | UKBB     | European | -0.031 | 0.007 | 3.77E-06 | 110423 | 0       | 1         | IVNT      | 1.09E-03 |
| rs16903574 | rs16903574  | 5:14610309_G_C   | Self-reported asthma                                                                          | EFO_0000270                                 | UKBB     | European | -0.011 | 0.001 | 1.52E-13 | 337159 | 39049   | 1         | risk diff | 2.68E-10 |
| rs16903574 | rs16903574  | 5:14610309_G_C   | Asthma                                                                                        | EFO_0000270                                 | UKBB     | European | -0.011 | 0.001 | 4.86E-13 | 336782 | 38791   | 1         | risk diff | 7.12E-10 |
| rs16903574 | rs16903574  | 5:14610309_G_C   | Allergic disease asthma hay fever or eczema                                                   | EFO_0003785                                 | 29083406 | European | -0.069 | 0.010 | 1.00E-12 | -      | -       | -         | log OR    | 1.36E-09 |
| rs16903574 | rs16903574  | 5:14610309_G_C   | No blood clot, bronchitis, emphysema, asthma, rhinitis, eczema or allergy diagnosed by doctor | -                                           | UKBB     | European | 0.014  | 0.002 | 3.35E-11 | 336782 | 228530  | 1         | risk diff | 3.09E-08 |
| rs16903574 | rs16903574  | 5:14610309_G_C   | Allergic disease                                                                              | EFO_0003785                                 | 29083406 | European | -0.070 | 0.011 | 1.68E-10 | 360838 | 180129  | 13        | log OR    | 1.33E-07 |
| rs16903574 | rs16903574  | 5:14610309_G_C   | Doctor diagnosed asthma                                                                       | EFO_0000270                                 | UKBB     | European | -0.019 | 0.003 | 3.42E-09 | 83529  | 10589   | 1         | risk diff | 1.94E-06 |
| rs16903574 | rs16903574  | 5:14610309_G_C   | Eosinophil percentage of white cells                                                          | EFO_0004586                                 | 27863252 | European | -0.036 | 0.007 | 5.98E-08 | 173480 | 0       | 2         | IVNT      | 2.62E-05 |
| rs16903574 | rs16903574  | 5:14610309_G_C   | Eosinophil percentage of granulocytes                                                         | EFO_0004586                                 | 27863252 | European | -0.034 | 0.007 | 4.37E-07 | 173480 | 0       | 2         | IVNT      | 1.58E-04 |
| rs16903574 | rs16903574  | 5:14610309_G_C   | Eosinophil count                                                                              | EFO_0004586                                 | 27863252 | European | -0.034 | 0.007 | 5.26E-07 | 173480 | 0       | 2         | IVNT      | 1.88E-04 |
| rs16903574 | rs16903574  | 5:14610309_G_C   | Hayfever, allergic rhinitis or eczema                                                         | EFO_0003956;<br>EFO_0005854;<br>EFO_0000274 | UKBB     | European | -0.009 | 0.002 | 4.90E-06 | 336782 | 77891   | 1         | risk diff | 1.38E-03 |
| rs16903574 | rs16903574  | 5:14610309_G_C   | Neutrophil percentage of granulocytes                                                         | EFO_0004586                                 | 27863252 | European | 0.030  | 0.007 | 9.77E-06 | 173480 | 0       | 2         | IVNT      | 2.53E-03 |
| rs16903574 | rs16903574  | 5:14610309_G_C   | Sum eosinophil basophil counts                                                                | EFO_0004586                                 | 27863252 | European | -0.029 | 0.007 | 1.42E-05 | 173480 | 0       | 2         | IVNT      | 3.48E-03 |
| rs16903574 | rs16903574  | 5:14610309_G_C   | Wheeze or whistling in the chest in last year                                                 | EFO_0009715                                 | UKBB     | European | -0.008 | 0.002 | 2.84E-05 | 331257 | 68531   | 1         | risk diff | 6.44E-03 |
| rs16903574 | rs16903574  | 5:14610309_G_C   | Mineral and other dietary supplements: calcium                                                | EFO_0008111                                 | UKBB     | European | 0.005  | 0.001 | 4.53E-05 | 336314 | 22047   | 1         | risk diff | 9.60E-03 |
| rs80101740 | rs80101740  | 5:98471135_C_A   | Postprocedural disorders of eye and adnexa                                                    | EFO_0009546                                 | UKBB     | European | -0.001 | 0.000 | 1.36E-07 | 337199 | 60      | 1         | risk diff | 5.39E-05 |
| rs80101740 | rs80101740  | 5:98471135_C_A   | Treatment with phenoxymethylpenicillin                                                        | EFO_0007056                                 | UKBB     | European | -0.001 | 0.000 | 8.51E-07 | 337159 | 68      | 1         | risk diff | 2.88E-04 |
| rs80101740 | rs80101740  | 5:98471135_C_A   | Cause of death: peripheral vascular disease, unspecified                                      | EFO_0003875                                 | UKBB     | European | -0.008 | 0.002 | 3.41E-06 | 7637   | 5       | 1         | risk diff | 9.91E-04 |
| rs80101740 | rs138827081 | 5:98511774_A_G   | Postprocedural disorders of eye and adnexa                                                    | EFO_0009546                                 | UKBB     | European | 0.001  | 0.000 | 1.00E-06 | 337199 | 60      | 1         | risk diff | 3.29E-04 |
| rs80101740 | rs138827081 | 5:98511774_A_G   | Treatment with phenoxymethylpenicillin                                                        | EFO_0007056                                 | UKBB     | European | 0.001  | 0.000 | 1.37E-06 | 337159 | 68      | 1         | risk diff | 4.33E-04 |
| rs80101740 | rs138827081 | 5:98511774_A_G   | Cause of death: peripheral vascular disease, unspecified                                      | EFO_0003875                                 | UKBB     | European | 0.008  | 0.002 | 9.34E-06 | 7637   | 5       | 1         | risk diff | 2.43E-03 |
| rs80101740 | rs138827081 | 5:98511774_A_G   | Malignant neoplasm of cervix uteri                                                            | EFO_0001061                                 | UKBB     | European | 0.001  | 0.000 | 1.36E-05 | 337199 | 145     | 1         | risk diff | 3.36E-03 |
| rs80101740 | rs138827081 | 5:98511774_A_G   | Self-reported vaginal prolapse or uterine prolapse                                            | EFO_1001864                                 | UKBB     | European | 0.004  | 0.001 | 1.67E-05 | 337159 | 1870    | 1         | risk diff | 4.01E-03 |
| rs80101740 | rs183720747 | 5:98516580_G_T   | Postprocedural disorders of eye and adnexa                                                    | EFO_0009546                                 | UKBB     | European | 0.001  | 0.000 | 1.07E-06 | 337199 | 60      | 1         | risk diff | 3.46E-04 |
| rs80101740 | rs183720747 | 5:98516580_G_T   | Treatment with phenoxymethylpenicillin                                                        | EFO_0007056                                 | UKBB     | European | 0.001  | 0.000 | 1.36E-06 | 337159 | 68      | 1         | risk diff | 4.32E-04 |
| rs80101740 | rs183720747 | 5:98516580_G_T   | Cause of death: peripheral vascular disease, unspecified                                      | EFO_0003875                                 | UKBB     | European | 0.008  | 0.002 | 9.18E-06 | 7637   | 5       | 1         | risk diff | 2.40E-03 |
| rs80101740 | rs183720747 | 5:98516580_G_T   | Malignant neoplasm of cervix uteri                                                            | EFO_0001061                                 | UKBB     | European | 0.001  | 0.000 | 1.29E-05 | 337199 | 145     | 1         | risk diff | 3.21E-03 |
| rs80101740 | rs183720747 | 5:98516580_G_T   | Self-reported vaginal prolapse or uterine prolapse                                            | EFO_1001864                                 | UKBB     | European | 0.003  | 0.001 | 2.18E-05 | 337159 | 1870    | 1         | risk diff | 5.13E-03 |
| rs80101740 | rs144009750 | 5:98530592_T_C   | Treatment with phenoxymethylpenicillin                                                        | EFO_0007056                                 | UKBB     | European | -0.001 | 0.000 | 2.31E-06 | 337159 | 68      | 1         | risk diff | 7.03E-04 |
| rs80101740 | rs144009750 | 5:98530592_T_C   | Postprocedural disorders of eye and adnexa                                                    | EFO_0009546                                 | UKBB     | European | -0.001 | 0.000 | 3.90E-06 | 337199 | 60      | 1         | risk diff | 1.12E-03 |

| sentinel   | SNP         | chr_bp_eff_other | trait                                                                                         | efo                                         | pmid     | ancestry   | beta   | se    | p        | n      | n_cases | n_studies | unit          | FDR      |
|------------|-------------|------------------|-----------------------------------------------------------------------------------------------|---------------------------------------------|----------|------------|--------|-------|----------|--------|---------|-----------|---------------|----------|
| rs80101740 | rs144009750 | 5:98530592_T_C   | Cause of death: aortic stenosis                                                               | EFO_0000266                                 | UKBB     | European   | -0.016 | 0.004 | 2.68E-05 | 7637   | 21      | 1         | risk diff     | 6.14E-03 |
| rs80101740 | rs144009750 | 5:98530592_T_C   | Malignant neoplasm of cervix uteri                                                            | EFO_0001061                                 | UKBB     | European   | -0.001 | 0.000 | 4.39E-05 | 337199 | 145     | 1         | risk diff     | 9.36E-03 |
| rs80101740 | rs144009750 | 5:98530592_T_C   | Self-reported vaginal prolapse or uterine prolapse                                            | EFO_1001864                                 | UKBB     | European   | -0.003 | 0.001 | 4.47E-05 | 337159 | 1870    | 1         | risk diff     | 9.51E-03 |
| rs80101740 | rs149035101 | 5:98534794_G_A   | Treatment with phenoxymethylpenicillin                                                        | EFO_0007056                                 | UKBB     | European   | -0.001 | 0.000 | 2.33E-06 | 337159 | 68      | 1         | risk diff     | 7.09E-04 |
| rs80101740 | rs149035101 | 5:98534794_G_A   | Postprocedural disorders of eye and adnexa                                                    | EFO_0009546                                 | UKBB     | European   | -0.001 | 0.000 | 5.02E-06 | 337199 | 60      | 1         | risk diff     | 1.41E-03 |
| rs80101740 | rs149035101 | 5:98534794_G_A   | Cause of death: aortic stenosis                                                               | EFO_0000266                                 | UKBB     | European   | -0.015 | 0.004 | 3.68E-05 | 7637   | 21      | 1         | risk diff     | 7.98E-03 |
| rs1837253  | rs1837253   | 5:110401872_C_T  | Self-reported asthma                                                                          | EFO_0000270                                 | UKBB     | European   | 0.012  | 0.001 | 8.10E-40 | 337159 | 39049   | 1         | risk diff     | 2.60E-35 |
| rs1837253  | rs1837253   | 5:110401872_C_T  | Asthma                                                                                        | EFO_0000270                                 | UKBB     | European   | 0.011  | 0.001 | 4.20E-38 | 336782 | 38791   | 1         | risk diff     | 1.08E-33 |
| rs1837253  | rs1837253   | 5:110401872_C_T  | Allergic disease asthma hay fever or eczema                                                   | EFO_0003785                                 | 29083406 | European   | NA     | NA    | 2.00E-31 | -      | -       | -         | log OR        | 4.68E-27 |
| rs1837253  | rs1837253   | 5:110401872_C_T  | Asthma                                                                                        | EFO_0000270                                 | 27182965 | European   | NA     | NA    | 3.00E-31 | -      | -       | -         | -             | 6.43E-27 |
| rs1837253  | rs1837253   | 5:110401872_C_T  | Asthma                                                                                        | EFO_0000270                                 | 29273806 | Mixed      | 0.146  | 0.014 | 2.03E-25 | 142486 | 23948   | 66        | log OR        | 2.61E-21 |
| rs1837253  | rs1837253   | 5:110401872_C_T  | No blood clot, bronchitis, emphysema, asthma, rhinitis, eczema or allergy diagnosed by doctor | -                                           | UKBB     | European   | -0.013 | 0.001 | 1.45E-24 | 336782 | 228530  | 1         | risk diff     | 1.62E-20 |
| rs1837253  | rs1837253   | 5:110401872_C_T  | Eosinophil count                                                                              | EFO_0004586                                 | 27863252 | European   | 0.040  | 0.004 | 1.88E-22 | 173480 | 0       | 2         | IVNT          | 1.61E-18 |
| rs1837253  | rs1837253   | 5:110401872_C_T  | Eosinophil counts                                                                             | EFO_0004842                                 | 27863252 | European   | 0.040  | 0.004 | 2.00E-22 | -      | -       | -         | unit increase | 1.66E-18 |
| rs1837253  | rs1837253   | 5:110401872_C_T  | Doctor diagnosed asthma                                                                       | EFO_0000270                                 | UKBB     | European   | 0.018  | 0.002 | 8.13E-22 | 83529  | 10589   | 1         | risk diff     | 6.16E-18 |
| rs1837253  | rs1837253   | 5:110401872_C_T  | Asthma                                                                                        | EFO_0000270                                 | 29273806 | European   | 0.145  | 0.015 | 1.06E-21 | 127669 | 19954   | 56        | risk OR       | 7.79E-18 |
| rs1837253  | rs1837253   | 5:110401872_C_T  | Eosinophil percentage of white cells                                                          | EFO_0007991                                 | 27863252 | European   | 0.038  | 0.004 | 4.00E-21 | -      | -       | -         | unit increase | 2.64E-17 |
| rs1837253  | rs1837253   | 5:110401872_C_T  | Eosinophil percentage of white cells                                                          | EFO_0004586                                 | 27863252 | European   | 0.038  | 0.004 | 4.49E-21 | 173480 | 0       | 2         | IVNT          | 2.89E-17 |
| rs1837253  | rs1837253   | 5:110401872_C_T  | Allergic disease                                                                              | EFO_0003785                                 | 29083406 | European   | 0.059  | 0.007 | 1.81E-19 | 360838 | 180129  | 13        | log OR        | 9.32E-16 |
| rs1837253  | rs1837253   | 5:110401872_C_T  | Sum eosinophil basophil counts                                                                | EFO_0004586                                 | 27863252 | European   | 0.036  | 0.004 | 5.28E-19 | 173480 | 0       | 2         | IVNT          | 2.34E-15 |
| rs1837253  | rs1837253   | 5:110401872_C_T  | Eosinophil percentage of granulocytes                                                         | EFO_0007996                                 | 27863252 | European   | 0.036  | 0.004 | 2.00E-18 | -      | -       | -         | unit increase | 8.58E-15 |
| rs1837253  | rs1837253   | 5:110401872_C_T  | Eosinophil percentage of granulocytes                                                         | EFO_0004586                                 | 27863252 | European   | 0.036  | 0.004 | 2.32E-18 | 173480 | 0       | 2         | IVNT          | 9.64E-15 |
| rs1837253  | rs1837253   | 5:110401872_C_T  | Asthma                                                                                        | EFO_0000270                                 | 21804548 | East Asian | 0.157  | 0.019 | 1.00E-16 | -      | -       | -         | log OR        | 3.22E-13 |
| rs1837253  | rs1837253   | 5:110401872_C_T  | Asthma                                                                                        | EFO_0000270                                 | 21804548 | East Asian | NA     | NA    | 1.00E-16 | -      | -       | -         | -             | 3.22E-13 |
| rs1837253  | rs1837253   | 5:110401872_C_T  | Adult asthma                                                                                  | EFO_1002011                                 | 21804548 | East Asian | NA     | NA    | 1.24E-16 | 4836   | -       | -         | -             | 3.94E-13 |
| rs1837253  | rs1837253   | 5:110401872_C_T  | Wheeze or whistling in the chest in last year                                                 | EFO_0009715                                 | UKBB     | European   | 0.009  | 0.001 | 1.18E-15 | 331257 | 68531   | 1         | risk diff     | 3.50E-12 |
| rs1837253  | rs1837253   | 5:110401872_C_T  | Treatment with ventolin 100micrograms inhaler                                                 | EFO_0007056                                 | UKBB     | European   | 0.004  | 0.000 | 1.58E-15 | 337159 | 9712    | 1         | risk diff     | 4.62E-12 |
| rs1837253  | rs1837253   | 5:110401872_C_T  | Neutrophil percentage of granulocytes                                                         | EFO_0004586                                 | 27863252 | European   | -0.032 | 0.004 | 2.73E-15 | 173480 | 0       | 2         | IVNT          | 7.71E-12 |
| rs1837253  | rs1837253   | 5:110401872_C_T  | Neutrophil percentage of granulocytes                                                         | EFO_0007994                                 | 27863252 | European   | 0.032  | 0.004 | 3.00E-15 | -      | -       | -         | unit decrease | 8.21E-12 |
| rs1837253  | rs1837253   | 5:110401872_C_T  | Nasal polyp                                                                                   | EFO_1000391                                 | UKBB     | European   | 0.002  | 0.000 | 7.06E-15 | 337199 | 1637    | 1         | risk diff     | 1.73E-11 |
| rs1837253  | rs1837253   | 5:110401872_C_T  | Asthma                                                                                        | EFO_0000270                                 | 21804549 | Mixed      | NA     | NA    | 1.00E-14 | 5388   | -       | -         | -             | 2.32E-11 |
| rs1837253  | rs1837253   | 5:110401872_C_T  | Asthma                                                                                        | EFO_0000270                                 | 21804549 | Mixed      | NA     | NA    | 1.00E-14 | -      | -       | -         | -             | 2.32E-11 |
| rs1837253  | rs1837253   | 5:110401872_C_T  | Asthma                                                                                        | EFO_0000270                                 | 21804549 | Mixed      | NA     | NA    | 1.00E-14 | -      | -       | -         | -             | 2.32E-11 |
| rs1837253  | rs1837253   | 5:110401872_C_T  | Hayfever, allergic rhinitis or eczema                                                         | EFO_0003956;<br>EFO_0005854;<br>EFO_0000274 | UKBB     | European   | 0.009  | 0.001 | 1.15E-14 | 336782 | 77891   | 1         | risk diff     | 2.58E-11 |
| rs1837253  | rs1837253   | 5:110401872_C_T  | Self-reported hayfever or allergic rhinitis                                                   | EFO_0005854                                 | UKBB     | European   | 0.005  | 0.001 | 1.58E-13 | 337159 | 19320   | 1         | risk diff     | 2.74E-10 |
| rs1837253  | rs1837253   | 5:110401872_C_T  | Asthma childhood later and unknown onset and severe asthma                                    | -                                           | 20860503 | European   | NA     | NA    | 1.37E-10 | 26475  | -       | -         | -             | 1.10E-07 |
| rs1837253  | rs1837253   | 5:110401872_C_T  | Asthma                                                                                        | EFO_0000270                                 | 20860503 | European   | 0.148  | 0.023 | 3.03E-10 | 26475  | 10365   | 24        | log OR        | 2.31E-07 |
| rs1837253  | rs1837253   | 5:110401872_C_T  | Asthma childhood later and unknown onset and severe and industrial asthma                     | -                                           | 20860503 | European   | NA     | NA    | 3.03E-10 | 26475  | -       | -         | -             | 2.31E-07 |

| sentinel  | SNP        | chr_bp_eff_other | trait                                                                                         | efo                                         | pmid     | ancestry | beta   | se    | p        | n      | n_cases | n_studies | unit      | FDR      |
|-----------|------------|------------------|-----------------------------------------------------------------------------------------------|---------------------------------------------|----------|----------|--------|-------|----------|--------|---------|-----------|-----------|----------|
| rs1837253 | rs1837253  | 5:110401872_C_T  | Asthma and hay fever                                                                          | EFO_0003956;<br>EFO_0000270                 | 24388013 | European | 0.157  | 0.026 | 1.00E-09 | -      | -       | -         | log OR    | 6.62E-07 |
| rs1837253 | rs1837253  | 5:110401872_C_T  | Self-reported nasal polyps                                                                    | EFO_1000391                                 | UKBB     | European | 0.001  | 0.000 | 4.64E-09 | 337159 | 1489    | 1         | risk diff | 2.50E-06 |
| rs1837253 | rs1837253  | 5:110401872_C_T  | Doctor diagnosed hayfever or allergic rhinitis                                                | EFO_0005854                                 | UKBB     | European | 0.014  | 0.002 | 6.08E-09 | 83529  | 18934   | 1         | risk diff | 3.21E-06 |
| rs1837253 | rs1837253  | 5:110401872_C_T  | Asthma                                                                                        | EFO_0000270                                 | 27611488 | Mixed    | NA     | NA    | 7.00E-08 | -      | -       | -         | -         | 3.00E-05 |
| rs1837253 | rs1837253  | 5:110401872_C_T  | Asthma childhood and later onset                                                              | -                                           | 20860503 | European | NA     | NA    | 7.52E-08 | 26475  | -       | -         | -         | 3.19E-05 |
| rs1837253 | rs1837253  | 5:110401872_C_T  | Asthma                                                                                        | EFO_0000270                                 | 27611488 | Mixed    | NA     | NA    | 4.00E-07 | -      | -       | -         | -         | 1.47E-04 |
| rs1837253 | rs1837253  | 5:110401872_C_T  | Number of self-reported non-cancer illnesses                                                  | EFO_0009801                                 | UKBB     | European | 0.011  | 0.002 | 2.55E-06 | 337159 | 0       | 1         | -         | 7.67E-04 |
| rs1837253 | rs1837253  | 5:110401872_C_T  | Severe asthma                                                                                 | EFO_0000270                                 | 20860503 | European | NA     | NA    | 3.00E-06 | 26475  | -       | -         | -         | 8.87E-04 |
| rs1837253 | rs1837253  | 5:110401872_C_T  | Taking other prescription medications                                                         | EFO_0007056                                 | UKBB     | European | 0.006  | 0.001 | 3.65E-06 | 336330 | 158113  | 1         | risk diff | 1.05E-03 |
| rs1837253 | rs1837253  | 5:110401872_C_T  | Asthma severe asthma                                                                          | EFO_0000270                                 | 22561531 | European | NA     | NA    | 5.52E-06 | 4279   | -       | -         | -         | 1.53E-03 |
| rs1837253 | rs1837253  | 5:110401872_C_T  | Asthma childhood onset                                                                        | EFO_0004591                                 | 20860503 | European | NA     | NA    | 7.76E-06 | 26475  | -       | -         | -         | 2.08E-03 |
| rs3749833 | rs59041913 | 5:131788135_T_C  | Self-reported asthma                                                                          | EFO_0000270                                 | UKBB     | European | -0.008 | 0.001 | 2.68E-19 | 337159 | 39049   | 1         | risk diff | 1.28E-15 |
| rs3749833 | rs59041913 | 5:131788135_T_C  | Asthma                                                                                        | EFO_0000270                                 | UKBB     | European | -0.008 | 0.001 | 1.01E-17 | 336782 | 38791   | 1         | risk diff | 3.75E-14 |
| rs3749833 | rs59041913 | 5:131788135_T_C  | Sum eosinophil basophil counts                                                                | EFO_0004586                                 | 27863252 | European | -0.031 | 0.004 | 3.51E-14 | 173480 | 0       | 2         | IVNT      | 7.23E-11 |
| rs3749833 | rs59041913 | 5:131788135_T_C  | Crohns disease                                                                                | EFO_0000384                                 | 26192919 | European | 0.217  | 0.030 | 1.97E-13 | 20883  | 5956    | 7         | log OR    | 3.33E-10 |
| rs3749833 | rs59041913 | 5:131788135_T_C  | No blood clot, bronchitis, emphysema, asthma, rhinitis, eczema or allergy diagnosed by doctor | -                                           | UKBB     | European | 0.010  | 0.001 | 7.72E-13 | 336782 | 228530  | 1         | risk diff | 1.09E-09 |
| rs3749833 | rs59041913 | 5:131788135_T_C  | Eosinophil count                                                                              | EFO_0004586                                 | 27863252 | European | -0.029 | 0.004 | 9.28E-13 | 173480 | 0       | 2         | IVNT      | 1.27E-09 |
| rs3749833 | rs59041913 | 5:131788135_T_C  | Height                                                                                        | EFO_0004339                                 | UKBB     | European | 0.014  | 0.002 | 2.50E-11 | 336474 | 0       | 1         | IVNT      | 2.42E-08 |
| rs3749833 | rs59041913 | 5:131788135_T_C  | Mean platelet volume                                                                          | EFO_0004586                                 | 27863252 | European | 0.027  | 0.004 | 2.60E-11 | 173480 | 0       | 2         | IVNT      | 2.51E-08 |
| rs3749833 | rs59041913 | 5:131788135_T_C  | Myeloid white cell count                                                                      | EFO_0004586                                 | 27863252 | European | -0.027 | 0.004 | 4.74E-11 | 173480 | 0       | 2         | IVNT      | 4.28E-08 |
| rs3749833 | rs59041913 | 5:131788135_T_C  | Granulocyte count                                                                             | EFO_0004586                                 | 27863252 | European | -0.026 | 0.004 | 1.44E-10 | 173480 | 0       | 2         | IVNT      | 1.15E-07 |
| rs3749833 | rs59041913 | 5:131788135_T_C  | Sum neutrophil eosinophil counts                                                              | EFO_0004586                                 | 27863252 | European | -0.025 | 0.004 | 4.81E-10 | 173480 | 0       | 2         | IVNT      | 3.52E-07 |
| rs3749833 | rs59041913 | 5:131788135_T_C  | Inflammatory bowel disease                                                                    | EFO_0003767                                 | 26192919 | European | 0.129  | 0.021 | 8.94E-10 | 34652  | 12882   | 15        | log OR    | 6.09E-07 |
| rs3749833 | rs59041913 | 5:131788135_T_C  | Sum basophil neutrophil counts                                                                | EFO_0004586                                 | 27863252 | European | -0.023 | 0.004 | 6.32E-09 | 173480 | 0       | 2         | IVNT      | 3.32E-06 |
| rs3749833 | rs59041913 | 5:131788135_T_C  | White blood cell count                                                                        | EFO_0004586                                 | 27863252 | European | -0.023 | 0.004 | 1.30E-08 | 173480 | 0       | 2         | IVNT      | 6.44E-06 |
| rs3749833 | rs59041913 | 5:131788135_T_C  | Neutrophil count                                                                              | EFO_0004586                                 | 27863252 | European | -0.023 | 0.004 | 1.70E-08 | 173480 | 0       | 2         | IVNT      | 8.27E-06 |
| rs3749833 | rs59041913 | 5:131788135_T_C  | Eosinophil percentage of white cells                                                          | EFO_0004586                                 | 27863252 | European | -0.022 | 0.004 | 7.82E-08 | 173480 | 0       | 2         | IVNT      | 3.29E-05 |
| rs3749833 | rs59041913 | 5:131788135_T_C  | Lymphocyte percentage of white cells                                                          | EFO_0004586                                 | 27863252 | European | 0.020  | 0.004 | 3.58E-07 | 173480 | 0       | 2         | IVNT      | 1.32E-04 |
| rs3749833 | rs59041913 | 5:131788135_T_C  | Allergic disease                                                                              | EFO_0003785                                 | 29083406 | European | -0.032 | 0.007 | 9.14E-07 | 360838 | 180129  | 13        | log OR    | 3.05E-04 |
| rs3749833 | rs59041913 | 5:131788135_T_C  | Comparative height size at age 10                                                             | -                                           | UKBB     | European | 0.009  | 0.002 | 1.45E-06 | 332021 | 0       | 1         | -         | 4.56E-04 |
| rs3749833 | rs59041913 | 5:131788135_T_C  | Hayfever, allergic rhinitis or eczema                                                         | EFO_0003956;<br>EFO_0005854;<br>EFO_0000274 | UKBB     | European | -0.006 | 0.001 | 1.66E-06 | 336782 | 77891   | 1         | risk diff | 5.14E-04 |
| rs3749833 | rs59041913 | 5:131788135_T_C  | Monocyte count                                                                                | EFO_0004586                                 | 27863252 | European | -0.018 | 0.004 | 1.07E-05 | 173480 | 0       | 2         | IVNT      | 2.74E-03 |
| rs3749833 | rs59041913 | 5:131788135_T_C  | Treatment with vitamin a+d capsule                                                            | EFO_0007056                                 | UKBB     | European | 0.000  | 0.000 | 1.08E-05 | 337159 | 53      | 1         | risk diff | 2.74E-03 |
| rs3749833 | rs59041913 | 5:131788135_T_C  | Self-reported nasal polyps                                                                    | EFO_1000391                                 | UKBB     | European | -0.001 | 0.000 | 1.90E-05 | 337159 | 1489    | 1         | risk diff | 4.53E-03 |
| rs3749833 | rs59041913 | 5:131788135_T_C  | Neutrophil percentage of granulocytes                                                         | EFO_0004586                                 | 27863252 | European | 0.017  | 0.004 | 2.38E-05 | 173480 | 0       | 2         | IVNT      | 5.51E-03 |
| rs3749833 | rs59041913 | 5:131788135_T_C  | Platelet count                                                                                | EFO_0004586                                 | 27863252 | European | -0.017 | 0.004 | 2.49E-05 | 173480 | 0       | 2         | IVNT      | 5.74E-03 |
| rs3749833 | rs59041913 | 5:131788135_T_C  | Doctor diagnosed asthma                                                                       | EFO_0000270                                 | UKBB     | European | -0.008 | 0.002 | 3.26E-05 | 83529  | 10589   | 1         | risk diff | 7.19E-03 |
| rs3749833 | rs59041913 | 5:131788135_T_C  | Eosinophil percentage of granulocytes                                                         | EFO_0004586                                 | 27863252 | European | -0.016 | 0.004 | 4.30E-05 | 173480 | 0       | 2         | IVNT      | 9.19E-03 |
| rs3749833 | rs7713065  | 5:131788334_C_A  | Self-reported asthma                                                                          | EFO_0000270                                 | UKBB     | European | 0.009  | 0.001 | 2.53E-25 | 337159 | 39049   | 1         | risk diff | 3.10E-21 |
| rs3749833 | rs7713065  | 5:131788334_C_A  | Asthma                                                                                        | EFO_0000270                                 | UKBB     | European | 0.009  | 0.001 | 2.92E-24 | 336782 | 38791   | 1         | risk diff | 2.89E-20 |
| rs3749833 | rs7713065  | 5:131788334_C_A  | Sum eosinophil basophil counts                                                                | EFO_0004586                                 | 27863252 | European | 0.037  | 0.004 | 3.69E-21 | 173480 | 0       | 2         | IVNT      | 2.50E-17 |
| rs3749833 | rs7713065  | 5:131788334_C_A  | Eosinophil count                                                                              | EFO_0004586                                 | 27863252 | European | 0.035  | 0.004 | 1.01E-19 | 173480 | 0       | 2         | IVNT      | 5.63E-16 |
| rs3749833 | rs7713065  | 5:131788334_C_A  | Height                                                                                        | EFO_0004339                                 | UKBB     | European | -0.017 | 0.002 | 2.23E-17 | 336474 | 0       | 1         | IVNT      | 7.97E-14 |
| rs3749833 | rs7713065  | 5:131788334_C_A  | Crohns disease                                                                                | EFO_0000384                                 | 26192919 | European | -0.218 | 0.028 | 5.59E-15 | 20883  | 5956    | 7         | log OR    | 1.40E-11 |

| sentinel  | SNP        | chr_bp_eff_other | trait                                                                                         | efo                                         | pmid     | ancestry | beta   | se    | p        | n      | n_cases | n_studies | unit          | FDR      |
|-----------|------------|------------------|-----------------------------------------------------------------------------------------------|---------------------------------------------|----------|----------|--------|-------|----------|--------|---------|-----------|---------------|----------|
| rs3749833 | rs7713065  | 5:131788334_C_A  | No blood clot, bronchitis, emphysema, asthma, rhinitis, eczema or allergy diagnosed by doctor | -                                           | UKBB     | European | -0.010 | 0.001 | 1.64E-14 | 336782 | 228530  | 1         | risk diff     | 3.60E-11 |
| rs3749833 | rs7713065  | 5:131788334_C_A  | Eosinophil percentage of white cells                                                          | EFO_0004586                                 | 27863252 | European | 0.028  | 0.004 | 4.30E-13 | 173480 | 0       | 2         | IVNT          | 6.47E-10 |
| rs3749833 | rs7713065  | 5:131788334_C_A  | Mean platelet volume                                                                          | EFO_0004586                                 | 27863252 | European | -0.028 | 0.004 | 7.27E-13 | 173480 | 0       | 2         | IVNT          | 1.04E-09 |
| rs3749833 | rs7713065  | 5:131788334_C_A  | Myeloid white cell count                                                                      | EFO_0004586                                 | 27863252 | European | 0.028  | 0.004 | 1.27E-12 | 173480 | 0       | 2         | IVNT          | 1.62E-09 |
| rs3749833 | rs7713065  | 5:131788334_C_A  | Granulocyte count                                                                             | EFO_0004586                                 | 27863252 | European | 0.027  | 0.004 | 3.54E-12 | 173480 | 0       | 2         | IVNT          | 3.98E-09 |
| rs3749833 | rs7713065  | 5:131788334_C_A  | Sum neutrophil eosinophil counts                                                              | EFO_0004586                                 | 27863252 | European | 0.026  | 0.004 | 1.22E-11 | 173480 | 0       | 2         | IVNT          | 1.27E-08 |
| rs3749833 | rs7713065  | 5:131788334_C_A  | Lung function FEV1FVC                                                                         | EFO_0004713                                 | 28166213 | European | -0.029 | 0.004 | 3.00E-11 | -      | -       | -         | unit increase | 2.84E-08 |
| rs3749833 | rs7713065  | 5:131788334_C_A  | Inflammatory bowel disease                                                                    | EFO_0003767                                 | 26192919 | European | -0.133 | 0.020 | 3.24E-11 | 34652  | 12882   | 15        | log OR        | 3.04E-08 |
| rs3749833 | rs7713065  | 5:131788334_C_A  | White blood cell count                                                                        | EFO_0004586                                 | 27863252 | European | 0.025  | 0.004 | 3.45E-10 | 173480 | 0       | 2         | IVNT          | 2.59E-07 |
| rs3749833 | rs7713065  | 5:131788334_C_A  | Sum basophil neutrophil counts                                                                | EFO_0004586                                 | 27863252 | European | 0.024  | 0.004 | 5.12E-10 | 173480 | 0       | 2         | IVNT          | 3.72E-07 |
| rs3749833 | rs7713065  | 5:131788334_C_A  | Neutrophil count                                                                              | EFO_0004586                                 | 27863252 | European | 0.024  | 0.004 | 1.58E-09 | 173480 | 0       | 2         | IVNT          | 9.60E-07 |
| rs3749833 | rs7713065  | 5:131788334_C_A  | Comparative height size at age 10                                                             | -                                           | UKBB     | European | -0.011 | 0.002 | 3.38E-09 | 332021 | 0       | 1         | -             | 1.93E-06 |
| rs3749833 | rs7713065  | 5:131788334_C_A  | Neutrophil percentage of granulocytes                                                         | EFO_0004586                                 | 27863252 | European | -0.023 | 0.004 | 4.68E-09 | 173480 | 0       | 2         | IVNT          | 2.52E-06 |
| rs3749833 | rs7713065  | 5:131788334_C_A  | Eosinophil percentage of granulocytes                                                         | EFO_0004586                                 | 27863252 | European | 0.023  | 0.004 | 5.28E-09 | 173480 | 0       | 2         | IVNT          | 2.80E-06 |
| rs3749833 | rs7713065  | 5:131788334_C_A  | Allergic disease                                                                              | EFO_0003785                                 | 29083406 | European | 0.036  | 0.006 | 6.44E-09 | 360838 | 180129  | 13        | log OR        | 3.37E-06 |
| rs3749833 | rs7713065  | 5:131788334_C_A  | Leg predicted mass left                                                                       | -                                           | UKBB     | European | -0.010 | 0.002 | 2.51E-08 | 331253 | 0       | 1         | IVNT          | 1.19E-05 |
| rs3749833 | rs7713065  | 5:131788334_C_A  | Leg fat-free mass left                                                                        | -                                           | UKBB     | European | -0.010 | 0.002 | 2.58E-08 | 331258 | 0       | 1         | IVNT          | 1.21E-05 |
| rs3749833 | rs7713065  | 5:131788334_C_A  | Leg fat-free mass right                                                                       | -                                           | UKBB     | European | -0.010 | 0.002 | 2.92E-08 | 331285 | 0       | 1         | IVNT          | 1.37E-05 |
| rs3749833 | rs7713065  | 5:131788334_C_A  | Leg predicted mass right                                                                      | -                                           | UKBB     | European | -0.010 | 0.002 | 3.01E-08 | 331285 | 0       | 1         | IVNT          | 1.41E-05 |
| rs3749833 | rs7713065  | 5:131788334_C_A  | Sitting height                                                                                | EFO_0004339                                 | UKBB     | European | -0.012 | 0.002 | 6.39E-08 | 336172 | 0       | 1         | IVNT          | 2.77E-05 |
| rs3749833 | rs7713065  | 5:131788334_C_A  | Whole body water mass                                                                         | -                                           | UKBB     | European | -0.009 | 0.002 | 1.01E-07 | 331315 | 0       | 1         | IVNT          | 4.14E-05 |
| rs3749833 | rs7713065  | 5:131788334_C_A  | Whole body fat-free mass                                                                      | -                                           | UKBB     | European | -0.009 | 0.002 | 1.05E-07 | 331291 | 0       | 1         | IVNT          | 4.28E-05 |
| rs3749833 | rs7713065  | 5:131788334_C_A  | Lymphocyte percentage of white cells                                                          | EFO_0004586                                 | 27863252 | European | -0.020 | 0.004 | 1.71E-07 | 173480 | 0       | 2         | IVNT          | 6.68E-05 |
| rs3749833 | rs7713065  | 5:131788334_C_A  | Basal metabolic rate                                                                          | EFO_0007777                                 | UKBB     | European | -0.010 | 0.002 | 1.82E-07 | 331307 | 0       | 1         | IVNT          | 7.09E-05 |
| rs3749833 | rs7713065  | 5:131788334_C_A  | Forced expiratory volume in 1-second, best measure                                            | EFO_0004314                                 | UKBB     | European | -0.013 | 0.003 | 2.86E-07 | 255492 | 0       | 1         | IVNT          | 1.08E-04 |
| rs3749833 | rs7713065  | 5:131788334_C_A  | Trunk fat-free mass                                                                           | -                                           | UKBB     | European | -0.009 | 0.002 | 4.88E-07 | 331030 | 0       | 1         | IVNT          | 1.75E-04 |
| rs3749833 | rs7713065  | 5:131788334_C_A  | Trunk predicted mass                                                                          | -                                           | UKBB     | European | -0.009 | 0.002 | 5.91E-07 | 330995 | 0       | 1         | IVNT          | 2.08E-04 |
| rs3749833 | rs7713065  | 5:131788334_C_A  | Doctor diagnosed asthma                                                                       | EFO_0000270                                 | UKBB     | European | 0.009  | 0.002 | 8.12E-07 | 83529  | 10589   | 1         | risk diff     | 2.76E-04 |
| rs3749833 | rs7713065  | 5:131788334_C_A  | Hayfever, allergic rhinitis or eczema                                                         | EFO_0003956;<br>EFO_0005854;<br>EFO_0000274 | UKBB     | European | 0.006  | 0.001 | 1.27E-06 | 336782 | 77891   | 1         | risk diff     | 4.08E-04 |
| rs3749833 | rs7713065  | 5:131788334_C_A  | Treatment with seretide 50 evohaler                                                           | EFO_0007056                                 | UKBB     | European | 0.001  | 0.000 | 1.32E-06 | 337159 | 3961    | 1         | risk diff     | 4.19E-04 |
| rs3749833 | rs7713065  | 5:131788334_C_A  | Monocyte count                                                                                | EFO_0004586                                 | 27863252 | European | 0.018  | 0.004 | 4.67E-06 | 173480 | 0       | 2         | IVNT          | 1.32E-03 |
| rs3749833 | rs7713065  | 5:131788334_C_A  | Forced expiratory volume in 1-second                                                          | EFO_0004314                                 | UKBB     | European | -0.011 | 0.002 | 5.26E-06 | 307638 | 0       | 1         | IVNT          | 1.47E-03 |
| rs3749833 | rs7713065  | 5:131788334_C_A  | Arm predicted mass left                                                                       | -                                           | UKBB     | European | -0.008 | 0.002 | 6.61E-06 | 331146 | 0       | 1         | IVNT          | 1.81E-03 |
| rs3749833 | rs7713065  | 5:131788334_C_A  | Self-reported nasal polyps                                                                    | EFO_1000391                                 | UKBB     | European | 0.001  | 0.000 | 6.69E-06 | 337159 | 1489    | 1         | risk diff     | 1.82E-03 |
| rs3749833 | rs7713065  | 5:131788334_C_A  | Hand grip strength right                                                                      | EFO_0006941                                 | UKBB     | European | -0.009 | 0.002 | 7.48E-06 | 335842 | 0       | 1         | IVNT          | 2.02E-03 |
| rs3749833 | rs7713065  | 5:131788334_C_A  | Arm fat-free mass left                                                                        | -                                           | UKBB     | European | -0.008 | 0.002 | 7.81E-06 | 331159 | 0       | 1         | IVNT          | 2.08E-03 |
| rs3749833 | rs7713065  | 5:131788334_C_A  | Wheeze or whistling in the chest in last year                                                 | EFO_0009715                                 | UKBB     | European | 0.005  | 0.001 | 1.62E-05 | 331257 | 68531   | 1         | risk diff     | 3.93E-03 |
| rs3749833 | rs7713065  | 5:131788334_C_A  | Basophil count                                                                                | EFO_0004586                                 | 27863252 | European | 0.016  | 0.004 | 1.84E-05 | 173480 | 0       | 2         | IVNT          | 4.41E-03 |
| rs3749833 | rs7713065  | 5:131788334_C_A  | Platelet count                                                                                | EFO_0004586                                 | 27863252 | European | 0.017  | 0.004 | 1.85E-05 | 173480 | 0       | 2         | IVNT          | 4.41E-03 |
| rs3749833 | rs7713065  | 5:131788334_C_A  | Weight                                                                                        | EFO_0004338                                 | UKBB     | European | -0.010 | 0.002 | 2.11E-05 | 336227 | 0       | 1         | IVNT          | 4.96E-03 |
| rs3749833 | rs7713065  | 5:131788334_C_A  | Hand grip strength left                                                                       | EFO_0006941                                 | UKBB     | European | -0.008 | 0.002 | 2.46E-05 | 335821 | 0       | 1         | IVNT          | 5.69E-03 |
| rs3749833 | rs7713065  | 5:131788334_C_A  | Treatment with vitamin a+d capsule                                                            | EFO_0007056                                 | UKBB     | European | 0.000  | 0.000 | 2.90E-05 | 337159 | 53      | 1         | risk diff     | 6.54E-03 |
| rs3749833 | rs10069798 | 5:131788421_A_T  | Self-reported asthma                                                                          | EFO_0000270                                 | UKBB     | European | 0.008  | 0.001 | 2.75E-19 | 337159 | 39049   | 1         | risk diff     | 1.28E-15 |
| rs3749833 | rs10069798 | 5:131788421_A_T  | Asthma                                                                                        | EFO_0000270                                 | UKBB     | European | 0.008  | 0.001 | 1.03E-17 | 336782 | 38791   | 1         | risk diff     | 3.78E-14 |

| sentinel  | SNP        | chr_bp_eff_other | trait                                                                                         | efo                                         | pmid     | ancestry | beta   | se    | p        | n      | n_cases | n_studies | unit      | FDR      |
|-----------|------------|------------------|-----------------------------------------------------------------------------------------------|---------------------------------------------|----------|----------|--------|-------|----------|--------|---------|-----------|-----------|----------|
| rs3749833 | rs10069798 | 5:131788421_A_T  | Sum eosinophil basophil counts                                                                | EFO_0004586                                 | 27863252 | European | 0.031  | 0.004 | 3.84E-14 | 173480 | 0       | 2         | IVNT      | 7.85E-11 |
| rs3749833 | rs10069798 | 5:131788421_A_T  | Crohns disease                                                                                | EFO_0000384                                 | 26192919 | European | -0.217 | 0.030 | 1.84E-13 | 20883  | 5956    | 7         | log OR    | 3.16E-10 |
| rs3749833 | rs10069798 | 5:131788421_A_T  | No blood clot, bronchitis, emphysema, asthma, rhinitis, eczema or allergy diagnosed by doctor | -                                           | UKBB     | European | -0.010 | 0.001 | 5.86E-13 | 336782 | 228530  | 1         | risk diff | 8.53E-10 |
| rs3749833 | rs10069798 | 5:131788421_A_T  | Eosinophil count                                                                              | EFO_0004586                                 | 27863252 | European | 0.029  | 0.004 | 8.78E-13 | 173480 | 0       | 2         | IVNT      | 1.22E-09 |
| rs3749833 | rs10069798 | 5:131788421_A_T  | Height                                                                                        | EFO_0004339                                 | UKBB     | European | -0.014 | 0.002 | 2.26E-11 | 336474 | 0       | 1         | IVNT      | 2.20E-08 |
| rs3749833 | rs10069798 | 5:131788421_A_T  | Mean platelet volume                                                                          | EFO_0004586                                 | 27863252 | European | -0.027 | 0.004 | 3.09E-11 | 173480 | 0       | 2         | IVNT      | 2.91E-08 |
| rs3749833 | rs10069798 | 5:131788421_A_T  | Myeloid white cell count                                                                      | EFO_0004586                                 | 27863252 | European | 0.027  | 0.004 | 4.78E-11 | 173480 | 0       | 2         | IVNT      | 4.30E-08 |
| rs3749833 | rs10069798 | 5:131788421_A_T  | Granulocyte count                                                                             | EFO_0004586                                 | 27863252 | European | 0.026  | 0.004 | 1.46E-10 | 173480 | 0       | 2         | IVNT      | 1.16E-07 |
| rs3749833 | rs10069798 | 5:131788421_A_T  | Sum neutrophil eosinophil counts                                                              | EFO_0004586                                 | 27863252 | European | 0.025  | 0.004 | 4.63E-10 | 173480 | 0       | 2         | IVNT      | 3.41E-07 |
| rs3749833 | rs10069798 | 5:131788421_A_T  | Inflammatory bowel disease                                                                    | EFO_0003767                                 | 26192919 | European | -0.129 | 0.021 | 9.16E-10 | 34652  | 12882   | 15        | log OR    | 6.19E-07 |
| rs3749833 | rs10069798 | 5:131788421_A_T  | Sum basophil neutrophil counts                                                                | EFO_0004586                                 | 27863252 | European | 0.024  | 0.004 | 6.47E-09 | 173480 | 0       | 2         | IVNT      | 3.38E-06 |
| rs3749833 | rs10069798 | 5:131788421_A_T  | White blood cell count                                                                        | EFO_0004586                                 | 27863252 | European | 0.023  | 0.004 | 1.13E-08 | 173480 | 0       | 2         | IVNT      | 5.68E-06 |
| rs3749833 | rs10069798 | 5:131788421_A_T  | Neutrophil count                                                                              | EFO_0004586                                 | 27863252 | European | 0.023  | 0.004 | 1.66E-08 | 173480 | 0       | 2         | IVNT      | 8.10E-06 |
| rs3749833 | rs10069798 | 5:131788421_A_T  | Eosinophil percentage of white cells                                                          | EFO_0004586                                 | 27863252 | European | 0.022  | 0.004 | 7.87E-08 | 173480 | 0       | 2         | IVNT      | 3.1E-05  |
| rs3749833 | rs10069798 | 5:131788421_A_T  | Lymphocyte percentage of white cells                                                          | EFO_0004586                                 | 27863252 | European | -0.021 | 0.004 | 3.53E-07 | 173480 | 0       | 2         | IVNT      | 1.31E-04 |
| rs3749833 | rs10069798 | 5:131788421_A_T  | Allergic disease                                                                              | EFO_0003785                                 | 29083406 | European | 0.032  | 0.007 | 1.04E-06 | 360838 | 180129  | 13        | log OR    | 3.38E-04 |
| rs3749833 | rs10069798 | 5:131788421_A_T  | Comparative height size at age 10                                                             | -                                           | UKBB     | European | -0.009 | 0.002 | 1.40E-06 | 332021 | 0       | 1         | -         | 4.42E-04 |
| rs3749833 | rs10069798 | 5:131788421_A_T  | Hayfever, allergic rhinitis or eczema                                                         | EFO_0003956;<br>EFO_0005854;<br>EFO_0000274 | UKBB     | European | 0.006  | 0.001 | 1.42E-06 | 336782 | 77891   | 1         | risk diff | 4.46E-04 |
| rs3749833 | rs10069798 | 5:131788421_A_T  | Treatment with vitamin a+d capsule                                                            | EFO_0007056                                 | UKBB     | European | 0.000  | 0.000 | 1.08E-05 | 337159 | 53      | 1         | risk diff | 2.74E-03 |
| rs3749833 | rs10069798 | 5:131788421_A_T  | Monocyte count                                                                                | EFO_0004586                                 | 27863252 | European | 0.018  | 0.004 | 1.17E-05 | 173480 | 0       | 2         | IVNT      | 2.95E-03 |
| rs3749833 | rs10069798 | 5:131788421_A_T  | Self-reported nasal polyps                                                                    | EFO_1000391                                 | UKBB     | European | 0.001  | 0.000 | 2.28E-05 | 337159 | 1489    | 1         | risk diff | 5.33E-03 |
| rs3749833 | rs10069798 | 5:131788421_A_T  | Platelet count                                                                                | EFO_0004586                                 | 27863252 | European | 0.017  | 0.004 | 2.36E-05 | 173480 | 0       | 2         | IVNT      | 5.48E-03 |
| rs3749833 | rs10069798 | 5:131788421_A_T  | Neutrophil percentage of granulocytes                                                         | EFO_0004586                                 | 27863252 | European | -0.017 | 0.004 | 2.65E-05 | 173480 | 0       | 2         | IVNT      | 6.07E-03 |
| rs3749833 | rs10069798 | 5:131788421_A_T  | Doctor diagnosed asthma                                                                       | EFO_0000270                                 | UKBB     | European | 0.008  | 0.002 | 3.64E-05 | 83529  | 10589   | 1         | risk diff | 7.93E-03 |
| rs3749833 | rs10069798 | 5:131788421_A_T  | Height                                                                                        | EFO_0004339                                 | 25282103 | European | -0.014 | 0.003 | 4.20E-05 | 253280 | 0       | 79        | Z-score   | 9.00E-03 |
| rs3749833 | rs10069798 | 5:131788421_A_T  | Eosinophil percentage of granulocytes                                                         | EFO_0004586                                 | 27863252 | European | 0.017  | 0.004 | 4.23E-05 | 173480 | 0       | 2         | IVNT      | 9.06E-03 |
| rs3749833 | rs1023518  | 5:131793772_T_G  | Self-reported asthma                                                                          | EFO_0000270                                 | UKBB     | European | -0.009 | 0.001 | 1.87E-25 | 337159 | 39049   | 1         | risk diff | 2.54E-21 |
| rs3749833 | rs1023518  | 5:131793772_T_G  | Asthma                                                                                        | EFO_0000270                                 | UKBB     | European | -0.009 | 0.001 | 2.22E-24 | 336782 | 38791   | 1         | risk diff | 2.29E-20 |
| rs3749833 | rs1023518  | 5:131793772_T_G  | Sum eosinophil basophil counts                                                                | EFO_0004586                                 | 27863252 | European | -0.037 | 0.004 | 2.55E-21 | 173480 | 0       | 2         | IVNT      | 1.77E-17 |
| rs3749833 | rs1023518  | 5:131793772_T_G  | Eosinophil count                                                                              | EFO_0004586                                 | 27863252 | European | -0.035 | 0.004 | 7.15E-20 | 173480 | 0       | 2         | IVNT      | 4.09E-16 |
| rs3749833 | rs1023518  | 5:131793772_T_G  | Height                                                                                        | EFO_0004339                                 | UKBB     | European | 0.017  | 0.002 | 2.37E-17 | 336474 | 0       | 1         | IVNT      | 8.25E-14 |
| rs3749833 | rs1023518  | 5:131793772_T_G  | Crohns disease                                                                                | EFO_0000384                                 | 23128233 | European | NA     | NA    | 3.20E-15 | 14342  | 6299    | 7         | log OR    | 8.67E-12 |
| rs3749833 | rs1023518  | 5:131793772_T_G  | Crohns disease                                                                                | EFO_0000384                                 | 26192919 | European | 0.217  | 0.028 | 8.65E-15 | 20883  | 5956    | 7         | log OR    | 2.10E-11 |
| rs3749833 | rs1023518  | 5:131793772_T_G  | No blood clot, bronchitis, emphysema, asthma, rhinitis, eczema or allergy diagnosed by doctor | -                                           | UKBB     | European | 0.010  | 0.001 | 1.61E-14 | 336782 | 228530  | 1         | risk diff | 3.58E-11 |
| rs3749833 | rs1023518  | 5:131793772_T_G  | Eosinophil percentage of white cells                                                          | EFO_0004586                                 | 27863252 | European | -0.028 | 0.004 | 3.36E-13 | 173480 | 0       | 2         | IVNT      | 5.21E-10 |
| rs3749833 | rs1023518  | 5:131793772_T_G  | Mean platelet volume                                                                          | EFO_0004586                                 | 27863252 | European | 0.028  | 0.004 | 8.68E-13 | 173480 | 0       | 2         | IVNT      | 1.21E-09 |
| rs3749833 | rs1023518  | 5:131793772_T_G  | Myeloid white cell count                                                                      | EFO_0004586                                 | 27863252 | European | -0.028 | 0.004 | 1.34E-12 | 173480 | 0       | 2         | IVNT      | 1.68E-09 |
| rs3749833 | rs1023518  | 5:131793772_T_G  | Granulocyte count                                                                             | EFO_0004586                                 | 27863252 | European | -0.027 | 0.004 | 3.73E-12 | 173480 | 0       | 2         | IVNT      | 4.18E-09 |
| rs3749833 | rs1023518  | 5:131793772_T_G  | Sum neutrophil eosinophil counts                                                              | EFO_0004586                                 | 27863252 | European | -0.026 | 0.004 | 1.29E-11 | 173480 | 0       | 2         | IVNT      | 1.33E-08 |
| rs3749833 | rs1023518  | 5:131793772_T_G  | Inflammatory bowel disease                                                                    | EFO_0003767                                 | 26192919 | European | 0.130  | 0.020 | 1.03E-10 | 34652  | 12882   | 15        | log OR    | 8.46E-08 |
| rs3749833 | rs1023518  | 5:131793772_T_G  | White blood cell count                                                                        | EFO_0004586                                 | 27863252 | European | -0.025 | 0.004 | 3.46E-10 | 173480 | 0       | 2         | IVNT      | 2.59E-07 |
| rs3749833 | rs1023518  | 5:131793772_T_G  | Sum basophil neutrophil counts                                                                | EFO_0004586                                 | 27863252 | European | -0.024 | 0.004 | 5.47E-10 | 173480 | 0       | 2         | IVNT      | 3.96E-07 |
| rs3749833 | rs1023518  | 5:131793772_T_G  | Asthma                                                                                        | EFO_0000270                                 | 29273806 | European | -0.085 | 0.014 | 1.16E-09 | 127669 | 19954   | 56        | log OR    | 7.46E-07 |
| rs3749833 | rs1023518  | 5:131793772_T_G  | Asthma                                                                                        | EFO_0000270                                 | 29273806 | Mixed    | -0.079 | 0.013 | 1.61E-09 | 142486 | 23948   | 66        | log OR    | 9.68E-07 |
| rs3749833 | rs1023518  | 5:131793772_T_G  | Neutrophil count                                                                              | EFO_0004586                                 | 27863252 | European | -0.023 | 0.004 | 1.70E-09 | 173480 | 0       | 2         | IVNT      | 1.01E-06 |

| sentinel  | SNP       | chr_bp_eff_other | trait                                                                                         | efo                                         | pmid     | ancestry | beta   | se    | p        | n      | n_cases | n_studies | unit      | FDR      |
|-----------|-----------|------------------|-----------------------------------------------------------------------------------------------|---------------------------------------------|----------|----------|--------|-------|----------|--------|---------|-----------|-----------|----------|
| rs3749833 | rs1023518 | 5:131793772 T G  | Neutrophil percentage of granulocytes                                                         | EFO_0004586                                 | 27863252 | European | 0.023  | 0.004 | 3.51E-09 | 173480 | 0       | 2         | IVNT      | 1.98E-06 |
| rs3749833 | rs1023518 | 5:131793772 T G  | Comparative height size at age 10                                                             | -                                           | UKBB     | European | 0.011  | 0.002 | 3.88E-09 | 332021 | 0       | 1         | -         | 2.14E-06 |
| rs3749833 | rs1023518 | 5:131793772 T G  | Eosinophil percentage of granulocytes                                                         | EFO_0004586                                 | 27863252 | European | -0.023 | 0.004 | 4.25E-09 | 173480 | 0       | 2         | IVNT      | 2.32E-06 |
| rs3749833 | rs1023518 | 5:131793772 T G  | Leg predicted mass left                                                                       | -                                           | UKBB     | European | 0.010  | 0.002 | 3.14E-08 | 331253 | 0       | 1         | IVNT      | 1.46E-05 |
| rs3749833 | rs1023518 | 5:131793772 T G  | Leg fat-free mass left                                                                        | -                                           | UKBB     | European | 0.010  | 0.002 | 3.28E-08 | 331258 | 0       | 1         | IVNT      | 1.52E-05 |
| rs3749833 | rs1023518 | 5:131793772 T G  | Leg fat-free mass right                                                                       | -                                           | UKBB     | European | 0.010  | 0.002 | 3.61E-08 | 331285 | 0       | 1         | IVNT      | 1.65E-05 |
| rs3749833 | rs1023518 | 5:131793772 T G  | Leg predicted mass right                                                                      | -                                           | UKBB     | European | 0.010  | 0.002 | 3.75E-08 | 331285 | 0       | 1         | IVNT      | 1.71E-05 |
| rs3749833 | rs1023518 | 5:131793772 T G  | Sitting height                                                                                | EFO_0004339                                 | UKBB     | European | 0.012  | 0.002 | 6.66E-08 | 336172 | 0       | 1         | IVNT      | 2.88E-05 |
| rs3749833 | rs1023518 | 5:131793772 T G  | Whole body water mass                                                                         | -                                           | UKBB     | European | 0.009  | 0.002 | 1.23E-07 | 331315 | 0       | 1         | IVNT      | 4.92E-05 |
| rs3749833 | rs1023518 | 5:131793772 T G  | Whole body fat-free mass                                                                      | -                                           | UKBB     | European | 0.009  | 0.002 | 1.28E-07 | 331291 | 0       | 1         | IVNT      | 5.09E-05 |
| rs3749833 | rs1023518 | 5:131793772 T G  | Lymphocyte percentage of white cells                                                          | EFO_0004586                                 | 27863252 | European | 0.020  | 0.004 | 1.60E-07 | 173480 | 0       | 2         | IVNT      | 6.28E-05 |
| rs3749833 | rs1023518 | 5:131793772 T G  | Allergic disease                                                                              | EFO_0003785                                 | 29083406 | European | -0.039 | 0.008 | 1.93E-07 | 360838 | 180129  | 13        | log OR    | 7.48E-05 |
| rs3749833 | rs1023518 | 5:131793772 T G  | Basal metabolic rate                                                                          | EFO_0007777                                 | UKBB     | European | 0.009  | 0.002 | 2.20E-07 | 331307 | 0       | 1         | IVNT      | 8.42E-05 |
| rs3749833 | rs1023518 | 5:131793772_T_G  | Forced expiratory volume in 1-second, best measure                                            | EFO_0004314                                 | UKBB     | European | 0.013  | 0.003 | 2.77E-07 | 255492 | 0       | 1         | IVNT      | 1.05E-04 |
| rs3749833 | rs1023518 | 5:131793772 T G  | Trunk fat-free mass                                                                           | -                                           | UKBB     | European | 0.009  | 0.002 | 5.92E-07 | 331030 | 0       | 1         | IVNT      | 2.08E-04 |
| rs3749833 | rs1023518 | 5:131793772 T G  | Irritable bowel syndrome                                                                      | EFO_0000555                                 | 18587394 | European | NA     | NA    | 6.12E-07 | 8059   | -       | -         | -         | 2.14E-04 |
| rs3749833 | rs1023518 | 5:131793772 T G  | Doctor diagnosed asthma                                                                       | EFO_0000270                                 | UKBB     | European | -0.009 | 0.002 | 6.78E-07 | 83529  | 10589   | 1         | risk diff | 2.33E-04 |
| rs3749833 | rs1023518 | 5:131793772 T G  | Trunk predicted mass                                                                          | -                                           | UKBB     | European | 0.009  | 0.002 | 7.16E-07 | 330995 | 0       | 1         | IVNT      | 2.45E-04 |
| rs3749833 | rs1023518 | 5:131793772 T G  | Treatment with seretide 50 evohaler                                                           | EFO_0007056                                 | UKBB     | European | -0.001 | 0.000 | 1.07E-06 | 337159 | 3961    | 1         | risk diff | 3.47E-04 |
| rs3749833 | rs1023518 | 5:131793772_T_G  | Hayfever, allergic rhinitis or eczema                                                         | EFO_0003956;<br>EFO_0005854;<br>EFO_0000274 | UKBB     | European | -0.006 | 0.001 | 1.24E-06 | 336782 | 77891   | 1         | risk diff | 3.98E-04 |
| rs3749833 | rs1023518 | 5:131793772 T G  | Height                                                                                        | EFO_0004339                                 | 25282103 | European | 0.016  | 0.003 | 2.10E-06 | 253280 | 0       | 79        | Z-score   | 6.44E-04 |
| rs3749833 | rs1023518 | 5:131793772 T G  | Monocyte count                                                                                | EFO_0004586                                 | 27863252 | European | -0.018 | 0.004 | 3.92E-06 | 173480 | 0       | 2         | IVNT      | 1.13E-03 |
| rs3749833 | rs1023518 | 5:131793772 T G  | Forced expiratory volume in 1-second                                                          | EFO_0004314                                 | UKBB     | European | 0.011  | 0.002 | 5.24E-06 | 307638 | 0       | 1         | IVNT      | 1.46E-03 |
| rs3749833 | rs1023518 | 5:131793772 T G  | Self-reported nasal polyps                                                                    | EFO_1000391                                 | UKBB     | European | -0.001 | 0.000 | 6.55E-06 | 337159 | 1489    | 1         | risk diff | 1.79E-03 |
| rs3749833 | rs1023518 | 5:131793772 T G  | Arm predicted mass left                                                                       | -                                           | UKBB     | European | 0.008  | 0.002 | 7.38E-06 | 331146 | 0       | 1         | IVNT      | 2.00E-03 |
| rs3749833 | rs1023518 | 5:131793772 T G  | Hand grip strength right                                                                      | EFO_0006941                                 | UKBB     | European | 0.009  | 0.002 | 7.46E-06 | 335842 | 0       | 1         | IVNT      | 2.01E-03 |
| rs3749833 | rs1023518 | 5:131793772 T G  | Arm fat-free mass left                                                                        | -                                           | UKBB     | European | 0.008  | 0.002 | 9.11E-06 | 331159 | 0       | 1         | IVNT      | 2.39E-03 |
| rs3749833 | rs1023518 | 5:131793772 T G  | Wheeze or whistling in the chest in last year                                                 | EFO_0009715                                 | UKBB     | European | -0.005 | 0.001 | 1.36E-05 | 331257 | 68531   | 1         | risk diff | 3.37E-03 |
| rs3749833 | rs1023518 | 5:131793772 T G  | Basophil count                                                                                | EFO_0004586                                 | 27863252 | European | -0.016 | 0.004 | 1.72E-05 | 173480 | 0       | 2         | IVNT      | 4.12E-03 |
| rs3749833 | rs1023518 | 5:131793772 T G  | Platelet count                                                                                | EFO_0004586                                 | 27863252 | European | -0.017 | 0.004 | 1.87E-05 | 173480 | 0       | 2         | IVNT      | 4.46E-03 |
| rs3749833 | rs1023518 | 5:131793772 T G  | Weight                                                                                        | EFO_0004338                                 | UKBB     | European | 0.010  | 0.002 | 2.46E-05 | 336227 | 0       | 1         | IVNT      | 5.68E-03 |
| rs3749833 | rs1023518 | 5:131793772 T G  | Asthma                                                                                        | EFO_0000270                                 | 20860503 | European | -0.100 | 0.024 | 2.50E-05 | 26475  | 10365   | 24        | log OR    | 5.76E-03 |
| rs3749833 | rs1023518 | 5:131793772 T G  | Asthma                                                                                        | EFO_0000270                                 | 20860503 | European | NA     | NA    | 2.50E-05 | 26475  | -       | -         | -         | 5.76E-03 |
| rs3749833 | rs1023518 | 5:131793772 T G  | Hand grip strength left                                                                       | EFO_0006941                                 | UKBB     | European | 0.008  | 0.002 | 2.73E-05 | 335821 | 0       | 1         | IVNT      | 6.23E-03 |
| rs3749833 | rs1023518 | 5:131793772 T G  | Treatment with vitamin a+d capsule                                                            | EFO_0007056                                 | UKBB     | European | 0.000  | 0.000 | 2.93E-05 | 337159 | 53      | 1         | risk diff | 6.58E-03 |
| rs3749833 | rs3857440 | 5:131794069 A G  | Self-reported asthma                                                                          | EFO_0000270                                 | UKBB     | European | 0.009  | 0.001 | 2.67E-25 | 337159 | 39049   | 1         | risk diff | 3.12E-21 |
| rs3749833 | rs3857440 | 5:131794069 A G  | Asthma                                                                                        | EFO_0000270                                 | UKBB     | European | 0.009  | 0.001 | 3.06E-24 | 336782 | 38791   | 1         | risk diff | 2.91E-20 |
| rs3749833 | rs3857440 | 5:131794069 A G  | Sum eosinophil basophil counts                                                                | EFO_0004586                                 | 27863252 | European | 0.037  | 0.004 | 2.46E-21 | 173480 | 0       | 2         | IVNT      | 1.76E-17 |
| rs3749833 | rs3857440 | 5:131794069 A G  | Eosinophil count                                                                              | EFO_0004586                                 | 27863252 | European | 0.036  | 0.004 | 6.17E-20 | 173480 | 0       | 2         | IVNT      | 3.61E-16 |
| rs3749833 | rs3857440 | 5:131794069 A G  | Height                                                                                        | EFO_0004339                                 | UKBB     | European | -0.017 | 0.002 | 2.34E-17 | 336474 | 0       | 1         | IVNT      | 8.25E-14 |
| rs3749833 | rs3857440 | 5:131794069 A G  | Crohns disease                                                                                | EFO_0000384                                 | 23128233 | European | NA     | NA    | 4.00E-15 | 14342  | 6299    | 7         | log OR    | 1.02E-11 |
| rs3749833 | rs3857440 | 5:131794069 A G  | Crohns disease                                                                                | EFO_0000384                                 | 26192919 | European | -0.216 | 0.028 | 9.04E-15 | 20883  | 5956    | 7         | log OR    | 2.17E-11 |
| rs3749833 | rs3857440 | 5:131794069_A_G  | No blood clot, bronchitis, emphysema, asthma, rhinitis, eczema or allergy diagnosed by doctor | -                                           | UKBB     | European | -0.010 | 0.001 | 2.06E-14 | 336782 | 228530  | 1         | risk diff | 4.39E-11 |
| rs3749833 | rs3857440 | 5:131794069 A G  | Eosinophil percentage of white cells                                                          | EFO_0004586                                 | 27863252 | European | 0.028  | 0.004 | 3.23E-13 | 173480 | 0       | 2         | IVNT      | 5.06E-10 |
| rs3749833 | rs3857440 | 5:131794069 A G  | Mean platelet volume                                                                          | EFO_0004586                                 | 27863252 | European | -0.028 | 0.004 | 1.23E-12 | 173480 | 0       | 2         | IVNT      | 1.59E-09 |

| sentinel  | SNP       | chr_bp_eff_other | trait                                              | efo                                         | pmid     | ancestry | beta   | se    | p        | n      | n_cases | n_studies | unit      | FDR      |
|-----------|-----------|------------------|----------------------------------------------------|---------------------------------------------|----------|----------|--------|-------|----------|--------|---------|-----------|-----------|----------|
| rs3749833 | rs3857440 | 5:131794069 A G  | Myeloid white cell count                           | EFO_0004586                                 | 27863252 | European | 0.028  | 0.004 | 1.24E-12 | 173480 | 0       | 2         | IVNT      | 1.60E-09 |
| rs3749833 | rs3857440 | 5:131794069 A G  | Granulocyte count                                  | EFO_0004586                                 | 27863252 | European | 0.027  | 0.004 | 3.04E-12 | 173480 | 0       | 2         | IVNT      | 3.46E-09 |
| rs3749833 | rs3857440 | 5:131794069 A G  | Sum neutrophil eosinophil counts                   | EFO_0004586                                 | 27863252 | European | 0.027  | 0.004 | 1.05E-11 | 173480 | 0       | 2         | IVNT      | 1.10E-08 |
| rs3749833 | rs3857440 | 5:131794069 A G  | Inflammatory bowel disease                         | EFO_0003767                                 | 26192919 | European | -0.132 | 0.020 | 3.32E-11 | 34652  | 12882   | 15        | log OR    | 3.07E-08 |
| rs3749833 | rs3857440 | 5:131794069 A G  | White blood cell count                             | EFO_0004586                                 | 27863252 | European | 0.025  | 0.004 | 2.83E-10 | 173480 | 0       | 2         | IVNT      | 2.17E-07 |
| rs3749833 | rs3857440 | 5:131794069 A G  | Sum basophil neutrophil counts                     | EFO_0004586                                 | 27863252 | European | 0.024  | 0.004 | 4.49E-10 | 173480 | 0       | 2         | IVNT      | 3.32E-07 |
| rs3749833 | rs3857440 | 5:131794069 A G  | Asthma                                             | EFO_0000270                                 | 29273806 | Mixed    | 0.080  | 0.013 | 1.04E-09 | 142486 | 23948   | 66        | log OR    | 6.85E-07 |
| rs3749833 | rs3857440 | 5:131794069 A G  | Neutrophil count                                   | EFO_0004586                                 | 27863252 | European | 0.024  | 0.004 | 1.40E-09 | 173480 | 0       | 2         | IVNT      | 8.69E-07 |
| rs3749833 | rs3857440 | 5:131794069 A G  | Asthma                                             | EFO_0000270                                 | 29273806 | European | 0.085  | 0.014 | 1.61E-09 | 127669 | 19954   | 56        | log OR    | 9.68E-07 |
| rs3749833 | rs3857440 | 5:131794069 A G  | Neutrophil percentage of granulocytes              | EFO_0004586                                 | 27863252 | European | -0.023 | 0.004 | 3.51E-09 | 173480 | 0       | 2         | IVNT      | 1.98E-06 |
| rs3749833 | rs3857440 | 5:131794069 A G  | Comparative height size at age 10                  | -                                           | UKBB     | European | -0.011 | 0.002 | 3.53E-09 | 332021 | 0       | 1         | -         | 1.99E-06 |
| rs3749833 | rs3857440 | 5:131794069 A G  | Eosinophil percentage of granulocytes              | EFO_0004586                                 | 27863252 | European | 0.023  | 0.004 | 4.15E-09 | 173480 | 0       | 2         | IVNT      | 2.27E-06 |
| rs3749833 | rs3857440 | 5:131794069 A G  | Allergic disease                                   | EFO_0003785                                 | 29083406 | European | 0.037  | 0.006 | 5.23E-09 | 360838 | 180129  | 13        | log OR    | 2.78E-06 |
| rs3749833 | rs3857440 | 5:131794069 A G  | Leg predicted mass left                            | -                                           | UKBB     | European | -0.010 | 0.002 | 3.00E-08 | 331253 | 0       | 1         | IVNT      | 1.40E-05 |
| rs3749833 | rs3857440 | 5:131794069 A G  | Leg fat-free mass left                             | -                                           | UKBB     | European | -0.010 | 0.002 | 3.10E-08 | 331258 | 0       | 1         | IVNT      | 1.45E-05 |
| rs3749833 | rs3857440 | 5:131794069 A G  | Leg fat-free mass right                            | -                                           | UKBB     | European | -0.010 | 0.002 | 3.43E-08 | 331285 | 0       | 1         | IVNT      | 1.58E-05 |
| rs3749833 | rs3857440 | 5:131794069 A G  | Leg predicted mass right                           | -                                           | UKBB     | European | -0.010 | 0.002 | 3.54E-08 | 331285 | 0       | 1         | IVNT      | 1.62E-05 |
| rs3749833 | rs3857440 | 5:131794069 A G  | Sitting height                                     | EFO_0004339                                 | UKBB     | European | -0.012 | 0.002 | 5.93E-08 | 336172 | 0       | 1         | IVNT      | 2.60E-05 |
| rs3749833 | rs3857440 | 5:131794069 A G  | Whole body water mass                              | -                                           | UKBB     | European | -0.009 | 0.002 | 1.16E-07 | 331315 | 0       | 1         | IVNT      | 4.67E-05 |
| rs3749833 | rs3857440 | 5:131794069 A G  | Whole body fat-free mass                           | -                                           | UKBB     | European | -0.009 | 0.002 | 1.20E-07 | 331291 | 0       | 1         | IVNT      | 4.82E-05 |
| rs3749833 | rs3857440 | 5:131794069 A G  | Lymphocyte percentage of white cells               | EFO_0004586                                 | 27863252 | European | -0.020 | 0.004 | 1.65E-07 | 173480 | 0       | 2         | IVNT      | 6.47E-05 |
| rs3749833 | rs3857440 | 5:131794069 A G  | Basal metabolic rate                               | EFO_0007777                                 | UKBB     | European | -0.010 | 0.002 | 2.05E-07 | 331307 | 0       | 1         | IVNT      | 7.92E-05 |
| rs3749833 | rs3857440 | 5:131794069_A_G  | Forced expiratory volume in 1-second, best measure | EFO_0004314                                 | UKBB     | European | -0.013 | 0.003 | 2.73E-07 | 255492 | 0       | 1         | IVNT      | 1.03E-04 |
| rs3749833 | rs3857440 | 5:131794069_A_G  | Trunk fat-free mass                                | -                                           | UKBB     | European | -0.009 | 0.002 | 5.64E-07 | 331030 | 0       | 1         | IVNT      | 2.00E-04 |
| rs3749833 | rs3857440 | 5:131794069_A_G  | Trunk predicted mass                               | -                                           | UKBB     | European | -0.009 | 0.002 | 6.80E-07 | 330995 | 0       | 1         | IVNT      | 2.34E-04 |
| rs3749833 | rs3857440 | 5:131794069_A_G  | Doctor diagnosed asthma                            | EFO_0000270                                 | UKBB     | European | 0.009  | 0.002 | 7.40E-07 | 83529  | 10589   | 1         | risk diff | 2.52E-04 |
| rs3749833 | rs3857440 | 5:131794069_A_G  | Height                                             | EFO_0004339                                 | 25282103 | European | -0.016 | 0.003 | 1.30E-06 | 253280 | 0       | 79        | Z-score   | 4.16E-04 |
| rs3749833 | rs3857440 | 5:131794069_A_G  | Treatment with seretide 50 evohaler                | EFO_0007056                                 | UKBB     | European | 0.001  | 0.000 | 1.31E-06 | 337159 | 3961    | 1         | risk diff | 4.19E-04 |
| rs3749833 | rs3857440 | 5:131794069_A_G  | Hayfever, allergic rhinitis or eczema              | EFO_0003956;<br>EFO_0005854;<br>EFO_0000274 | UKBB     | European | 0.006  | 0.001 | 1.46E-06 | 336782 | 77891   | 1         | risk diff | 4.59E-04 |
| rs3749833 | rs3857440 | 5:131794069_A_G  | Monocyte count                                     | EFO_0004586                                 | 27863252 | European | 0.018  | 0.004 | 3.40E-06 | 173480 | 0       | 2         | IVNT      | 9.90E-04 |
| rs3749833 | rs3857440 | 5:131794069_A_G  | Forced expiratory volume in 1-second               | EFO_0004314                                 | UKBB     | European | -0.011 | 0.002 | 5.24E-06 | 307638 | 0       | 1         | IVNT      | 1.46E-03 |
| rs3749833 | rs3857440 | 5:131794069_A_G  | Self-reported nasal polyps                         | EFO_1000391                                 | UKBB     | European | 0.001  | 0.000 | 6.42E-06 | 337159 | 1489    | 1         | risk diff | 1.76E-03 |
| rs3749833 | rs3857440 | 5:131794069_A_G  | Arm predicted mass left                            | -                                           | UKBB     | European | -0.008 | 0.002 | 6.77E-06 | 331146 | 0       | 1         | IVNT      | 1.84E-03 |
| rs3749833 | rs3857440 | 5:131794069_A_G  | Hand grip strength right                           | EFO_0006941                                 | UKBB     | European | -0.009 | 0.002 | 6.93E-06 | 335842 | 0       | 1         | IVNT      | 1.89E-03 |
| rs3749833 | rs3857440 | 5:131794069_A_G  | Arm fat-free mass left                             | -                                           | UKBB     | European | -0.008 | 0.002 | 8.29E-06 | 331159 | 0       | 1         | IVNT      | 2.20E-03 |
| rs3749833 | rs3857440 | 5:131794069_A_G  | Wheeze or whistling in the chest in last year      | EFO_0009715                                 | UKBB     | European | 0.005  | 0.001 | 1.48E-05 | 331257 | 68531   | 1         | risk diff | 3.61E-03 |
| rs3749833 | rs3857440 | 5:131794069_A_G  | Basophil count                                     | EFO_0004586                                 | 27863252 | European | 0.016  | 0.004 | 1.65E-05 | 173480 | 0       | 2         | IVNT      | 3.98E-03 |
| rs3749833 | rs3857440 | 5:131794069_A_G  | Platelet count                                     | EFO_0004586                                 | 27863252 | European | 0.017  | 0.004 | 2.25E-05 | 173480 | 0       | 2         | IVNT      | 5.28E-03 |
| rs3749833 | rs3857440 | 5:131794069_A_G  | Weight                                             | EFO_0004338                                 | UKBB     | European | -0.010 | 0.002 | 2.26E-05 | 336227 | 0       | 1         | IVNT      | 5.28E-03 |
| rs3749833 | rs3857440 | 5:131794069_A_G  | Hand grip strength left                            | EFO_0006941                                 | UKBB     | European | -0.008 | 0.002 | 2.58E-05 | 335821 | 0       | 1         | IVNT      | 5.93E-03 |
| rs3749833 | rs3857440 | 5:131794069_A_G  | Treatment with vitamin a+d capsule                 | EFO_0007056                                 | UKBB     | European | 0.000  | 0.000 | 2.91E-05 | 337159 | 53      | 1         | risk diff | 6.54E-03 |
| rs3749833 | rs3857440 | 5:131794069_A_G  | Age at menopause                                   | EFO_0004704;<br>EFO_0004703                 | 26414677 | European | -0.100 | 0.020 | 3.00E-05 | 69360  | 0       | 33        | years     | 6.71E-03 |
| rs3749833 | rs3749833 | 5:131799626 C T  | Self-reported asthma                               | EFO_0000270                                 | UKBB     | European | -0.009 | 0.001 | 1.88E-25 | 337159 | 39049   | 1         | risk diff | 2.54E-21 |
| rs3749833 | rs3749833 | 5:131799626 C T  | Asthma                                             | EFO_0000270                                 | UKBB     | European | -0.009 | 0.001 | 2.20E-24 | 336782 | 38791   | 1         | risk diff | 2.29E-20 |
| rs3749833 | rs3749833 | 5:131799626 C T  | Sum eosinophil basophil counts                     | EFO_0004586                                 | 27863252 | European | -0.036 | 0.004 | 1.33E-19 | 173480 | 0       | 2         | IVNT      | 7.14E-16 |

| sentinel  | SNP        | chr_bp_eff_other | trait                                                                                         | efo                                         | pmid     | ancestry | beta   | se    | p        | n      | n_cases | n_studies | unit      | FDR      |
|-----------|------------|------------------|-----------------------------------------------------------------------------------------------|---------------------------------------------|----------|----------|--------|-------|----------|--------|---------|-----------|-----------|----------|
| rs3749833 | rs3749833  | 5:131799626_C_T  | Eosinophil count                                                                              | EFO_0004586                                 | 27863252 | European | -0.035 | 0.004 | 2.15E-18 | 173480 | 0       | 2         | IVNT      | 9.05E-15 |
| rs3749833 | rs3749833  | 5:131799626_C_T  | Height                                                                                        | EFO_0004339                                 | UKBB     | European | 0.016  | 0.002 | 3.82E-17 | 336474 | 0       | 1         | IVNT      | 1.29E-13 |
| rs3749833 | rs3749833  | 5:131799626_C_T  | Mean platelet volume                                                                          | EFO_0004586                                 | 27863252 | European | 0.032  | 0.004 | 5.67E-15 | 173480 | 0       | 2         | IVNT      | 1.40E-11 |
| rs3749833 | rs3749833  | 5:131799626_C_T  | Crohns disease                                                                                | EFO_0000384                                 | 26192919 | European | 0.217  | 0.028 | 1.04E-14 | 20883  | 5956    | 7         | log OR    | 2.39E-11 |
| rs3749833 | rs3749833  | 5:131799626_C_T  | No blood clot, bronchitis, emphysema, asthma, rhinitis, eczema or allergy diagnosed by doctor | -                                           | UKBB     | European | 0.010  | 0.001 | 1.12E-14 | 336782 | 228530  | 1         | risk diff | 2.52E-11 |
| rs3749833 | rs3749833  | 5:131799626_C_T  | Myeloid white cell count                                                                      | EFO_0004586                                 | 27863252 | European | -0.029 | 0.004 | 3.12E-13 | 173480 | 0       | 2         | IVNT      | 4.93E-10 |
| rs3749833 | rs3749833  | 5:131799626_C_T  | Granulocyte count                                                                             | EFO_0004586                                 | 27863252 | European | -0.029 | 0.004 | 9.12E-13 | 173480 | 0       | 2         | IVNT      | 1.25E-09 |
| rs3749833 | rs3749833  | 5:131799626_C_T  | Eosinophil percentage of white cells                                                          | EFO_0004586                                 | 27863252 | European | -0.028 | 0.004 | 1.97E-12 | 173480 | 0       | 2         | IVNT      | 2.35E-09 |
| rs3749833 | rs3749833  | 5:131799626_C_T  | Sum neutrophil eosinophil counts                                                              | EFO_0004586                                 | 27863252 | European | -0.028 | 0.004 | 2.62E-12 | 173480 | 0       | 2         | IVNT      | 3.04E-09 |
| rs3749833 | rs3749833  | 5:131799626_C_T  | Allergic disease asthma hay fever or eczema                                                   | EFO_0003785                                 | 29083406 | European | -0.038 | 0.006 | 3.00E-11 | -      | -       | -         | log OR    | 2.84E-08 |
| rs3749833 | rs3749833  | 5:131799626_C_T  | Sum basophil neutrophil counts                                                                | EFO_0004586                                 | 27863252 | European | -0.026 | 0.004 | 9.52E-11 | 173480 | 0       | 2         | IVNT      | 7.91E-08 |
| rs3749833 | rs3749833  | 5:131799626_C_T  | Inflammatory bowel disease                                                                    | EFO_0003767                                 | 26192919 | European | 0.130  | 0.020 | 1.05E-10 | 34652  | 12882   | 15        | log OR    | 8.66E-08 |
| rs3749833 | rs3749833  | 5:131799626_C_T  | Neutrophil count                                                                              | EFO_0004586                                 | 27863252 | European | -0.025 | 0.004 | 3.29E-10 | 173480 | 0       | 2         | IVNT      | 2.49E-07 |
| rs3749833 | rs3749833  | 5:131799626_C_T  | Lymphocyte percentage of white cells                                                          | EFO_0004586                                 | 27863252 | European | 0.025  | 0.004 | 3.56E-10 | 173480 | 0       | 2         | IVNT      | 2.66E-07 |
| rs3749833 | rs3749833  | 5:131799626_C_T  | White blood cell count                                                                        | EFO_0004586                                 | 27863252 | European | -0.024 | 0.004 | 2.10E-09 | 173480 | 0       | 2         | IVNT      | 1.23E-06 |
| rs3749833 | rs3749833  | 5:131799626_C_T  | Allergic disease                                                                              | EFO_0003785                                 | 29083406 | European | -0.038 | 0.006 | 3.62E-09 | 360838 | 180129  | 13        | log OR    | 2.03E-06 |
| rs3749833 | rs3749833  | 5:131799626_C_T  | Comparative height size at age 10                                                             | -                                           | UKBB     | European | 0.011  | 0.002 | 3.67E-09 | 332021 | 0       | 1         | -         | 2.04E-06 |
| rs3749833 | rs3749833  | 5:131799626_C_T  | Eosinophil percentage of granulocytes                                                         | EFO_0004586                                 | 27863252 | European | -0.022 | 0.004 | 3.41E-08 | 173480 | 0       | 2         | IVNT      | 1.57E-05 |
| rs3749833 | rs3749833  | 5:131799626_C_T  | Leg predicted mass left                                                                       | -                                           | UKBB     | European | 0.010  | 0.002 | 3.79E-08 | 331253 | 0       | 1         | IVNT      | 1.73E-05 |
| rs3749833 | rs3749833  | 5:131799626_C_T  | Leg fat-free mass left                                                                        | -                                           | UKBB     | European | 0.010  | 0.002 | 3.89E-08 | 331258 | 0       | 1         | IVNT      | 1.77E-05 |
| rs3749833 | rs3749833  | 5:131799626_C_T  | Leg fat-free mass right                                                                       | -                                           | UKBB     | European | 0.010  | 0.002 | 4.28E-08 | 331285 | 0       | 1         | IVNT      | 1.93E-05 |
| rs3749833 | rs3749833  | 5:131799626_C_T  | Leg predicted mass right                                                                      | -                                           | UKBB     | European | 0.010  | 0.002 | 4.44E-08 | 331285 | 0       | 1         | IVNT      | 1.99E-05 |
| rs3749833 | rs3749833  | 5:131799626_C_T  | Neutrophil percentage of granulocytes                                                         | EFO_0004586                                 | 27863252 | European | 0.022  | 0.004 | 6.15E-08 | 173480 | 0       | 2         | IVNT      | 2.68E-05 |
| rs3749833 | rs3749833  | 5:131799626_C_T  | Sitting height                                                                                | EFO_0004339                                 | UKBB     | European | 0.011  | 0.002 | 7.32E-08 | 336172 | 0       | 1         | IVNT      | 3.11E-05 |
| rs3749833 | rs3749833  | 5:131799626_C_T  | Whole body water mass                                                                         | -                                           | UKBB     | European | 0.009  | 0.002 | 1.40E-07 | 331315 | 0       | 1         | IVNT      | 5.53E-05 |
| rs3749833 | rs3749833  | 5:131799626_C_T  | Whole body fat-free mass                                                                      | -                                           | UKBB     | European | 0.009  | 0.002 | 1.52E-07 | 331291 | 0       | 1         | IVNT      | 5.97E-05 |
| rs3749833 | rs3749833  | 5:131799626_C_T  | Basal metabolic rate                                                                          | EFO_0007777                                 | UKBB     | European | 0.009  | 0.002 | 2.48E-07 | 331307 | 0       | 1         | IVNT      | 9.45E-05 |
| rs3749833 | rs3749833  | 5:131799626_C_T  | Forced expiratory volume in 1-second, best measure                                            | EFO_0004314                                 | UKBB     | European | 0.013  | 0.003 | 3.05E-07 | 255492 | 0       | 1         | IVNT      | 1.15E-04 |
| rs3749833 | rs3749833  | 5:131799626_C_T  | Trunk fat-free mass                                                                           | -                                           | UKBB     | European | 0.009  | 0.002 | 7.20E-07 | 331030 | 0       | 1         | IVNT      | 2.46E-04 |
| rs3749833 | rs3749833  | 5:131799626_C_T  | Trunk predicted mass                                                                          | -                                           | UKBB     | European | 0.009  | 0.002 | 8.65E-07 | 330995 | 0       | 1         | IVNT      | 2.91E-04 |
| rs3749833 | rs3749833  | 5:131799626_C_T  | Doctor diagnosed asthma                                                                       | EFO_0000270                                 | UKBB     | European | -0.009 | 0.002 | 9.74E-07 | 83529  | 10589   | 1         | risk diff | 3.21E-04 |
| rs3749833 | rs3749833  | 5:131799626_C_T  | Hayfever, allergic rhinitis or eczema                                                         | EFO_0003956;<br>EFO_0005854;<br>EFO_0000274 | UKBB     | European | -0.006 | 0.001 | 1.06E-06 | 336782 | 77891   | 1         | risk diff | 3.45E-04 |
| rs3749833 | rs3749833  | 5:131799626_C_T  | Treatment with seretide 50 evohaler                                                           | EFO_0007056                                 | UKBB     | European | -0.001 | 0.000 | 1.40E-06 | 337159 | 3961    | 1         | risk diff | 4.42E-04 |
| rs3749833 | rs3749833  | 5:131799626_C_T  | Monocyte count                                                                                | EFO_0004586                                 | 27863252 | European | -0.018 | 0.004 | 4.96E-06 | 173480 | 0       | 2         | IVNT      | 1.39E-03 |
| rs3749833 | rs3749833  | 5:131799626_C_T  | Forced expiratory volume in 1-second                                                          | EFO_0004314                                 | UKBB     | European | 0.011  | 0.002 | 5.91E-06 | 307638 | 0       | 1         | IVNT      | 1.64E-03 |
| rs3749833 | rs3749833  | 5:131799626_C_T  | Platelet count                                                                                | EFO_0004586                                 | 27863252 | European | -0.019 | 0.004 | 6.13E-06 | 173480 | 0       | 2         | IVNT      | 1.69E-03 |
| rs3749833 | rs3749833  | 5:131799626_C_T  | Arm predicted mass left                                                                       | -                                           | UKBB     | European | 0.008  | 0.002 | 7.39E-06 | 331146 | 0       | 1         | IVNT      | 2.00E-03 |
| rs3749833 | rs3749833  | 5:131799626_C_T  | Hand grip strength right                                                                      | EFO_0006941                                 | UKBB     | European | 0.009  | 0.002 | 7.61E-06 | 335842 | 0       | 1         | IVNT      | 2.05E-03 |
| rs3749833 | rs3749833  | 5:131799626_C_T  | Self-reported nasal polyps                                                                    | EFO_1000391                                 | UKBB     | European | -0.001 | 0.000 | 8.28E-06 | 337159 | 1489    | 1         | risk diff | 2.20E-03 |
| rs3749833 | rs3749833  | 5:131799626_C_T  | Arm fat-free mass left                                                                        | -                                           | UKBB     | European | 0.008  | 0.002 | 9.14E-06 | 331159 | 0       | 1         | IVNT      | 2.40E-03 |
| rs3749833 | rs3749833  | 5:131799626_C_T  | Wheeze or whistling in the chest in last year                                                 | EFO_0009715                                 | UKBB     | European | -0.005 | 0.001 | 1.46E-05 | 331257 | 68531   | 1         | risk diff | 3.58E-03 |
| rs3749833 | rs3749833  | 5:131799626_C_T  | Weight                                                                                        | EFO_0004338                                 | UKBB     | European | 0.010  | 0.002 | 2.41E-05 | 336227 | 0       | 1         | IVNT      | 5.57E-03 |
| rs3749833 | rs3749833  | 5:131799626_C_T  | Hand grip strength left                                                                       | EFO_0006941                                 | UKBB     | European | 0.008  | 0.002 | 2.70E-05 | 335821 | 0       | 1         | IVNT      | 6.18E-03 |
| rs3749833 | rs3749833  | 5:131799626_C_T  | Treatment with vitamin a+d capsule                                                            | EFO_0007056                                 | UKBB     | European | 0.000  | 0.000 | 2.81E-05 | 337159 | 53      | 1         | risk diff | 6.38E-03 |
| rs3749833 | rs11748326 | 5:131799959_T_C  | Self-reported asthma                                                                          | EFO_0000270                                 | UKBB     | European | -0.009 | 0.001 | 1.27E-20 | 337159 | 39049   | 1         | risk diff | 7.81E-17 |



| sentinel  | SNP        | chr_bp_eff_other | trait                                                                                         | efo                                         | pmid     | ancestry | beta   | se    | p        | n      | n_cases | n_studies | unit      | FDR      |
|-----------|------------|------------------|-----------------------------------------------------------------------------------------------|---------------------------------------------|----------|----------|--------|-------|----------|--------|---------|-----------|-----------|----------|
| rs3749833 | rs11748326 | 5:131799959 T C  | Asthma                                                                                        | EFO_0000270                                 | UKBB     | European | -0.008 | 0.001 | 5.03E-19 | 336782 | 38791   | 1         | risk diff | 2.28E-15 |
| rs3749833 | rs11748326 | 5:131799959 T C  | Mean platelet volume                                                                          | EFO_0004586                                 | 27863252 | European | 0.032  | 0.004 | 6.51E-14 | 173480 | 0       | 2         | IVNT      | 1.23E-10 |
| rs3749833 | rs11748326 | 5:131799959 T C  | Sum eosinophil basophil counts                                                                | EFO_0004586                                 | 27863252 | European | -0.031 | 0.004 | 1.64E-13 | 173480 | 0       | 2         | IVNT      | 2.83E-10 |
| rs3749833 | rs11748326 | 5:131799959_T_C  | No blood clot, bronchitis, emphysema, asthma, rhinitis, eczema or allergy diagnosed by doctor | -                                           | UKBB     | European | 0.010  | 0.001 | 1.90E-13 | 336782 | 228530  | 1         | risk diff | 3.24E-10 |
| rs3749833 | rs11748326 | 5:131799959 T C  | Crohns disease                                                                                | EFO_0000384                                 | 26192919 | European | 0.214  | 0.030 | 3.93E-13 | 20883  | 5956    | 7         | log OR    | 6.03E-10 |
| rs3749833 | rs11748326 | 5:131799959 T C  | Eosinophil count                                                                              | EFO_0004586                                 | 27863252 | European | -0.029 | 0.004 | 2.12E-12 | 173480 | 0       | 2         | IVNT      | 2.48E-09 |
| rs3749833 | rs11748326 | 5:131799959 T C  | Height                                                                                        | EFO_0004339                                 | UKBB     | European | 0.014  | 0.002 | 3.21E-12 | 336474 | 0       | 1         | IVNT      | 3.64E-09 |
| rs3749833 | rs11748326 | 5:131799959 T C  | Myeloid white cell count                                                                      | EFO_0004586                                 | 27863252 | European | -0.028 | 0.004 | 3.27E-11 | 173480 | 0       | 2         | IVNT      | 3.06E-08 |
| rs3749833 | rs11748326 | 5:131799959 T C  | Granulocyte count                                                                             | EFO_0004586                                 | 27863252 | European | -0.027 | 0.004 | 1.09E-10 | 173480 | 0       | 2         | IVNT      | 8.91E-08 |
| rs3749833 | rs11748326 | 5:131799959 T C  | Sum neutrophil eosinophil counts                                                              | EFO_0004586                                 | 27863252 | European | -0.026 | 0.004 | 3.29E-10 | 173480 | 0       | 2         | IVNT      | 2.49E-07 |
| rs3749833 | rs11748326 | 5:131799959 T C  | Lymphocyte percentage of white cells                                                          | EFO_0004586                                 | 27863252 | European | 0.026  | 0.004 | 6.37E-10 | 173480 | 0       | 2         | IVNT      | 4.57E-07 |
| rs3749833 | rs11748326 | 5:131799959 T C  | Inflammatory bowel disease                                                                    | EFO_0003767                                 | 26192919 | European | 0.126  | 0.021 | 1.90E-09 | 34652  | 12882   | 15        | log OR    | 1.12E-06 |
| rs3749833 | rs11748326 | 5:131799959 T C  | Sum basophil neutrophil counts                                                                | EFO_0004586                                 | 27863252 | European | -0.025 | 0.004 | 3.09E-09 | 173480 | 0       | 2         | IVNT      | 1.78E-06 |
| rs3749833 | rs11748326 | 5:131799959 T C  | Neutrophil count                                                                              | EFO_0004586                                 | 27863252 | European | -0.024 | 0.004 | 9.83E-09 | 173480 | 0       | 2         | IVNT      | 5.01E-06 |
| rs3749833 | rs11748326 | 5:131799959 T C  | Eosinophil percentage of white cells                                                          | EFO_0004586                                 | 27863252 | European | -0.023 | 0.004 | 4.86E-08 | 173480 | 0       | 2         | IVNT      | 2.16E-05 |
| rs3749833 | rs11748326 | 5:131799959 T C  | White blood cell count                                                                        | EFO_0004586                                 | 27863252 | European | -0.022 | 0.004 | 1.36E-07 | 173480 | 0       | 2         | IVNT      | 5.39E-05 |
| rs3749833 | rs11748326 | 5:131799959 T C  | Allergic disease                                                                              | EFO_0003785                                 | 29083406 | European | -0.035 | 0.007 | 2.88E-07 | 360838 | 180129  | 13        | log OR    | 1.09E-04 |
| rs3749833 | rs11748326 | 5:131799959_T_C  | Hayfever, allergic rhinitis or eczema                                                         | EFO_0003956;<br>EFO_0005854;<br>EFO_0000274 | UKBB     | European | -0.006 | 0.001 | 3.71E-07 | 336782 | 77891   | 1         | risk diff | 1.37E-04 |
| rs3749833 | rs11748326 | 5:131799959 T C  | Comparative height size at age 10                                                             | -                                           | UKBB     | European | 0.010  | 0.002 | 4.25E-07 | 332021 | 0       | 1         | -         | 1.55E-04 |
| rs3749833 | rs11748326 | 5:131799959 T C  | Platelet count                                                                                | EFO_0004586                                 | 27863252 | European | -0.020 | 0.004 | 4.33E-06 | 173480 | 0       | 2         | IVNT      | 1.23E-03 |
| rs3749833 | rs11748326 | 5:131799959 T C  | Monocyte count                                                                                | EFO_0004586                                 | 27863252 | European | -0.019 | 0.004 | 9.77E-06 | 173480 | 0       | 2         | IVNT      | 2.53E-03 |
| rs3749833 | rs11748326 | 5:131799959 T C  | Leg fat-free mass left                                                                        | -                                           | UKBB     | European | 0.008  | 0.002 | 9.93E-06 | 331258 | 0       | 1         | IVNT      | 2.57E-03 |
| rs3749833 | rs11748326 | 5:131799959 T C  | Leg predicted mass left                                                                       | -                                           | UKBB     | European | 0.008  | 0.002 | 1.08E-05 | 331253 | 0       | 1         | IVNT      | 2.75E-03 |
| rs3749833 | rs11748326 | 5:131799959 T C  | Self-reported nasal polyps                                                                    | EFO_1000391                                 | UKBB     | European | -0.001 | 0.000 | 1.51E-05 | 337159 | 1489    | 1         | risk diff | 3.69E-03 |
| rs3749833 | rs11748326 | 5:131799959 T C  | Doctor diagnosed asthma                                                                       | EFO_0000270                                 | UKBB     | European | -0.008 | 0.002 | 1.61E-05 | 83529  | 10589   | 1         | risk diff | 3.90E-03 |
| rs3749833 | rs11748326 | 5:131799959 T C  | Leg fat-free mass right                                                                       | -                                           | UKBB     | European | 0.008  | 0.002 | 1.66E-05 | 331285 | 0       | 1         | IVNT      | 4.00E-03 |
| rs3749833 | rs11748326 | 5:131799959 T C  | Leg predicted mass right                                                                      | -                                           | UKBB     | European | 0.008  | 0.002 | 1.82E-05 | 331285 | 0       | 1         | IVNT      | 4.36E-03 |
| rs3749833 | rs11748326 | 5:131799959 T C  | Treatment with vitamin a+d capsule                                                            | EFO_0007056                                 | UKBB     | European | 0.000  | 0.000 | 2.04E-05 | 337159 | 53      | 1         | risk diff | 4.82E-03 |
| rs3749833 | rs11748326 | 5:131799959 T C  | Neutrophil percentage of white cells                                                          | EFO_0004586                                 | 27863252 | European | -0.017 | 0.004 | 3.32E-05 | 173480 | 0       | 2         | IVNT      | 7.30E-03 |
| rs3749833 | rs11748326 | 5:131799959 T C  | Whole body fat-free mass                                                                      | -                                           | UKBB     | European | 0.007  | 0.002 | 3.94E-05 | 331291 | 0       | 1         | IVNT      | 8.48E-03 |
| rs3749833 | rs11748326 | 5:131799959 T C  | Whole body water mass                                                                         | -                                           | UKBB     | European | 0.007  | 0.002 | 3.98E-05 | 331315 | 0       | 1         | IVNT      | 8.55E-03 |
| rs3749833 | rs11748326 | 5:131799959 T C  | Sitting height                                                                                | EFO_0004339                                 | UKBB     | European | 0.009  | 0.002 | 4.40E-05 | 336172 | 0       | 1         | IVNT      | 9.36E-03 |
| rs3749833 | rs10077785 | 5:131801158 T C  | Self-reported asthma                                                                          | EFO_0000270                                 | UKBB     | European | -0.009 | 0.001 | 1.28E-20 | 337159 | 39049   | 1         | risk diff | 7.81E-17 |
| rs3749833 | rs10077785 | 5:131801158 T C  | Asthma                                                                                        | EFO_0000270                                 | UKBB     | European | -0.008 | 0.001 | 5.06E-19 | 336782 | 38791   | 1         | risk diff | 2.28E-15 |
| rs3749833 | rs10077785 | 5:131801158 T C  | Mean platelet volume                                                                          | EFO_0004586                                 | 27863252 | European | 0.033  | 0.004 | 9.99E-15 | 173480 | 0       | 2         | IVNT      | 2.32E-11 |
| rs3749833 | rs10077785 | 5:131801158 T C  | Crohns disease                                                                                | EFO_0000384                                 | 23128233 | European | NA     | NA    | 4.20E-14 | 14342  | 6299    | 7         | log OR    | 8.45E-11 |
| rs3749833 | rs10077785 | 5:131801158 T C  | Sum eosinophil basophil counts                                                                | EFO_0004586                                 | 27863252 | European | -0.031 | 0.004 | 2.02E-13 | 173480 | 0       | 2         | IVNT      | 3.40E-10 |
| rs3749833 | rs10077785 | 5:131801158_T_C  | No blood clot, bronchitis, emphysema, asthma, rhinitis, eczema or allergy diagnosed by doctor | -                                           | UKBB     | European | 0.010  | 0.001 | 2.06E-13 | 336782 | 228530  | 1         | risk diff | 3.44E-10 |
| rs3749833 | rs10077785 | 5:131801158 T C  | Crohns disease                                                                                | EFO_0000384                                 | 26192919 | European | 0.214  | 0.030 | 4.01E-13 | 20883  | 5956    | 7         | log OR    | 6.10E-10 |
| rs3749833 | rs10077785 | 5:131801158 T C  | Eosinophil count                                                                              | EFO_0004586                                 | 27863252 | European | -0.029 | 0.004 | 2.08E-12 | 173480 | 0       | 2         | IVNT      | 2.44E-09 |
| rs3749833 | rs10077785 | 5:131801158 T C  | Height                                                                                        | EFO_0004339                                 | UKBB     | European | 0.014  | 0.002 | 2.89E-12 | 336474 | 0       | 1         | IVNT      | 3.32E-09 |
| rs3749833 | rs10077785 | 5:131801158 T C  | Myeloid white cell count                                                                      | EFO_0004586                                 | 27863252 | European | -0.028 | 0.004 | 2.84E-11 | 173480 | 0       | 2         | IVNT      | 2.71E-08 |
| rs3749833 | rs10077785 | 5:131801158 T C  | Granulocyte count                                                                             | EFO_0004586                                 | 27863252 | European | -0.027 | 0.004 | 8.70E-11 | 173480 | 0       | 2         | IVNT      | 7.27E-08 |
| rs3749833 | rs10077785 | 5:131801158 T C  | Sum neutrophil eosinophil counts                                                              | EFO_0004586                                 | 27863252 | European | -0.027 | 0.004 | 2.52E-10 | 173480 | 0       | 2         | IVNT      | 1.95E-07 |
| rs3749833 | rs10077785 | 5:131801158 T C  | Lymphocyte percentage of white cells                                                          | EFO_0004586                                 | 27863252 | European | 0.026  | 0.004 | 7.74E-10 | 173480 | 0       | 2         | IVNT      | 5.39E-07 |

| sentinel  | SNP        | chr_bp_eff_other | trait                                                                                         | efo                                         | pmid     | ancestry | beta   | se    | p        | n      | n_cases | n_studies | unit      | FDR      |
|-----------|------------|------------------|-----------------------------------------------------------------------------------------------|---------------------------------------------|----------|----------|--------|-------|----------|--------|---------|-----------|-----------|----------|
| rs3749833 | rs10077785 | 5:131801158 T C  | Inflammatory bowel disease                                                                    | EFO_0003767                                 | 26192919 | European | 0.126  | 0.021 | 1.82E-09 | 34652  | 12882   | 15        | log OR    | 1.08E-06 |
| rs3749833 | rs10077785 | 5:131801158 T C  | Crohn's disease                                                                               | NCIT_C2965                                  | 17554300 | European | NA     | NA    | 2.25E-09 | 4806   | -       | -         | -         | 1.32E-06 |
| rs3749833 | rs10077785 | 5:131801158 T C  | Sum basophil neutrophil counts                                                                | EFO_0004586                                 | 27863252 | European | -0.025 | 0.004 | 2.42E-09 | 173480 | 0       | 2         | IVNT      | 1.41E-06 |
| rs3749833 | rs10077785 | 5:131801158 T C  | Neutrophil count                                                                              | EFO_0004586                                 | 27863252 | European | -0.024 | 0.004 | 7.48E-09 | 173480 | 0       | 2         | IVNT      | 3.87E-06 |
| rs3749833 | rs10077785 | 5:131801158 T C  | Asthma                                                                                        | EFO_0000270                                 | 29273806 | European | -0.082 | 0.015 | 2.35E-08 | 127669 | 19954   | 56        | log OR    | 1.12E-05 |
| rs3749833 | rs10077785 | 5:131801158 T C  | Eosinophil percentage of white cells                                                          | EFO_0004586                                 | 27863252 | European | -0.023 | 0.004 | 4.82E-08 | 173480 | 0       | 2         | IVNT      | 2.16E-05 |
| rs3749833 | rs10077785 | 5:131801158 T C  | Asthma                                                                                        | EFO_0000270                                 | 29273806 | Mixed    | -0.077 | 0.014 | 5.21E-08 | 142486 | 23948   | 66        | log OR    | 2.30E-05 |
| rs3749833 | rs10077785 | 5:131801158 T C  | White blood cell count                                                                        | EFO_0004586                                 | 27863252 | European | -0.022 | 0.004 | 1.13E-07 | 173480 | 0       | 2         | IVNT      | 4.59E-05 |
| rs3749833 | rs10077785 | 5:131801158 T C  | Allergic disease                                                                              | EFO_0003785                                 | 29083406 | European | -0.035 | 0.007 | 3.24E-07 | 360838 | 180129  | 13        | log OR    | 1.21E-04 |
| rs3749833 | rs10077785 | 5:131801158 T C  | Comparative height size at age 10                                                             | -                                           | UKBB     | European | 0.010  | 0.002 | 3.84E-07 | 332021 | 0       | 1         | -         | 1.41E-04 |
| rs3749833 | rs10077785 | 5:131801158 T C  | Hayfever, allergic rhinitis or eczema                                                         | EFO_0003956;<br>EFO_0005854;<br>EFO_0000274 | UKBB     | European | -0.006 | 0.001 | 4.01E-07 | 336782 | 77891   | 1         | risk diff | 1.47E-04 |
| rs3749833 | rs10077785 | 5:131801158 T C  | Irritable bowel syndrome                                                                      | EFO_0000555                                 | 18587394 | European | NA     | NA    | 2.99E-06 | 8059   | -       | -         | -         | 8.86E-04 |
| rs3749833 | rs10077785 | 5:131801158 T C  | Platelet count                                                                                | EFO_0004586                                 | 27863252 | European | -0.020 | 0.004 | 3.35E-06 | 173480 | 0       | 2         | IVNT      | 9.77E-04 |
| rs3749833 | rs10077785 | 5:131801158 T C  | Leg fat-free mass left                                                                        | -                                           | UKBB     | European | 0.008  | 0.002 | 9.37E-06 | 331258 | 0       | 1         | IVNT      | 2.43E-03 |
| rs3749833 | rs10077785 | 5:131801158 T C  | Leg predicted mass left                                                                       | -                                           | UKBB     | European | 0.008  | 0.002 | 1.01E-05 | 331253 | 0       | 1         | IVNT      | 2.61E-03 |
| rs3749833 | rs10077785 | 5:131801158 T C  | Doctor diagnosed asthma                                                                       | EFO_0000270                                 | UKBB     | European | -0.008 | 0.002 | 1.50E-05 | 83529  | 10589   | 1         | risk diff | 3.66E-03 |
| rs3749833 | rs10077785 | 5:131801158 T C  | Leg fat-free mass right                                                                       | -                                           | UKBB     | European | 0.008  | 0.002 | 1.61E-05 | 331285 | 0       | 1         | IVNT      | 3.91E-03 |
| rs3749833 | rs10077785 | 5:131801158 T C  | Leg predicted mass right                                                                      | -                                           | UKBB     | European | 0.008  | 0.002 | 1.77E-05 | 331285 | 0       | 1         | IVNT      | 4.26E-03 |
| rs3749833 | rs10077785 | 5:131801158 T C  | Self-reported nasal polyps                                                                    | EFO_1000391                                 | UKBB     | European | -0.001 | 0.000 | 1.86E-05 | 337159 | 1489    | 1         | risk diff | 4.45E-03 |
| rs3749833 | rs10077785 | 5:131801158 T C  | Monocyte count                                                                                | EFO_0004586                                 | 27863252 | European | -0.018 | 0.004 | 1.96E-05 | 173480 | 0       | 2         | IVNT      | 4.65E-03 |
| rs3749833 | rs10077785 | 5:131801158 T C  | Treatment with vitamin a+d capsule                                                            | EFO_0007056                                 | UKBB     | European | 0.000  | 0.000 | 2.05E-05 | 337159 | 53      | 1         | risk diff | 4.84E-03 |
| rs3749833 | rs10077785 | 5:131801158 T C  | Neutrophil percentage of white cells                                                          | EFO_0004586                                 | 27863252 | European | -0.018 | 0.004 | 2.75E-05 | 173480 | 0       | 2         | IVNT      | 6.26E-03 |
| rs3749833 | rs10077785 | 5:131801158 T C  | Whole body fat-free mass                                                                      | -                                           | UKBB     | European | 0.007  | 0.002 | 3.77E-05 | 331291 | 0       | 1         | IVNT      | 8.13E-03 |
| rs3749833 | rs10077785 | 5:131801158 T C  | Whole body water mass                                                                         | -                                           | UKBB     | European | 0.007  | 0.002 | 3.77E-05 | 331315 | 0       | 1         | IVNT      | 8.13E-03 |
| rs3749833 | rs10077785 | 5:131801158 T C  | Sitting height                                                                                | EFO_0004339                                 | UKBB     | European | 0.009  | 0.002 | 4.27E-05 | 336172 | 0       | 1         | IVNT      | 9.13E-03 |
| rs3749833 | rs10067603 | 5:131803868 G A  | Self-reported asthma                                                                          | EFO_0000270                                 | UKBB     | European | -0.008 | 0.001 | 1.12E-19 | 337159 | 39049   | 1         | risk diff | 6.14E-16 |
| rs3749833 | rs10067603 | 5:131803868 G A  | Asthma                                                                                        | EFO_0000270                                 | UKBB     | European | -0.008 | 0.001 | 4.09E-18 | 336782 | 38791   | 1         | risk diff | 1.67E-14 |
| rs3749833 | rs10067603 | 5:131803868 G A  | Mean platelet volume                                                                          | EFO_0004586                                 | 27863252 | European | 0.033  | 0.004 | 2.04E-14 | 173480 | 0       | 2         | IVNT      | 4.37E-11 |
| rs3749833 | rs10067603 | 5:131803868 G A  | Crohn's disease                                                                               | EFO_0000384                                 | 26192919 | European | 0.215  | 0.030 | 3.13E-13 | 20883  | 5956    | 7         | log OR    | 4.93E-10 |
| rs3749833 | rs10067603 | 5:131803868 G A  | No blood clot, bronchitis, emphysema, asthma, rhinitis, eczema or allergy diagnosed by doctor | -                                           | UKBB     | European | 0.010  | 0.001 | 1.14E-12 | 336782 | 228530  | 1         | risk diff | 1.50E-09 |
| rs3749833 | rs10067603 | 5:131803868 G A  | Sum eosinophil basophil counts                                                                | EFO_0004586                                 | 27863252 | European | -0.029 | 0.004 | 4.27E-12 | 173480 | 0       | 2         | IVNT      | 4.72E-09 |
| rs3749833 | rs10067603 | 5:131803868 G A  | Height                                                                                        | EFO_0004339                                 | UKBB     | European | 0.014  | 0.002 | 1.29E-11 | 336474 | 0       | 1         | IVNT      | 1.33E-08 |
| rs3749833 | rs10067603 | 5:131803868 G A  | Eosinophil count                                                                              | EFO_0004586                                 | 27863252 | European | -0.028 | 0.004 | 5.98E-11 | 173480 | 0       | 2         | IVNT      | 5.22E-08 |
| rs3749833 | rs10067603 | 5:131803868 G A  | Myeloid white cell count                                                                      | EFO_0004586                                 | 27863252 | European | -0.028 | 0.004 | 8.72E-11 | 173480 | 0       | 2         | IVNT      | 7.27E-08 |
| rs3749833 | rs10067603 | 5:131803868 G A  | Granulocyte count                                                                             | EFO_0004586                                 | 27863252 | European | -0.027 | 0.004 | 3.04E-10 | 173480 | 0       | 2         | IVNT      | 2.31E-07 |
| rs3749833 | rs10067603 | 5:131803868 G A  | Sum neutrophil eosinophil counts                                                              | EFO_0004586                                 | 27863252 | European | -0.026 | 0.004 | 7.75E-10 | 173480 | 0       | 2         | IVNT      | 5.39E-07 |
| rs3749833 | rs10067603 | 5:131803868 G A  | Inflammatory bowel disease                                                                    | EFO_0003767                                 | 26192919 | European | 0.127  | 0.021 | 1.33E-09 | 34652  | 12882   | 15        | log OR    | 8.36E-07 |
| rs3749833 | rs10067603 | 5:131803868 G A  | Lymphocyte percentage of white cells                                                          | EFO_0004586                                 | 27863252 | European | 0.025  | 0.004 | 1.70E-09 | 173480 | 0       | 2         | IVNT      | 1.01E-06 |
| rs3749833 | rs10067603 | 5:131803868 G A  | Sum basophil neutrophil counts                                                                | EFO_0004586                                 | 27863252 | European | -0.025 | 0.004 | 6.72E-09 | 173480 | 0       | 2         | IVNT      | 3.50E-06 |
| rs3749833 | rs10067603 | 5:131803868 G A  | Neutrophil count                                                                              | EFO_0004586                                 | 27863252 | European | -0.024 | 0.004 | 1.84E-08 | 173480 | 0       | 2         | IVNT      | 8.89E-06 |
| rs3749833 | rs10067603 | 5:131803868 G A  | Asthma                                                                                        | EFO_0000270                                 | 29273806 | European | -0.082 | 0.015 | 2.25E-08 | 127669 | 19954   | 56        | log OR    | 1.08E-05 |
| rs3749833 | rs10067603 | 5:131803868 G A  | Asthma                                                                                        | EFO_0000270                                 | 29273806 | Mixed    | -0.078 | 0.014 | 5.01E-08 | 142486 | 23948   | 66        | log OR    | 2.22E-05 |
| rs3749833 | rs10067603 | 5:131803868 G A  | White blood cell count                                                                        | EFO_0004586                                 | 27863252 | European | -0.022 | 0.004 | 3.41E-07 | 173480 | 0       | 2         | IVNT      | 1.27E-04 |
| rs3749833 | rs10067603 | 5:131803868 G A  | Eosinophil percentage of white cells                                                          | EFO_0004586                                 | 27863252 | European | -0.021 | 0.004 | 5.21E-07 | 173480 | 0       | 2         | IVNT      | 1.87E-04 |
| rs3749833 | rs10067603 | 5:131803868 G A  | Comparative height size at age 10                                                             | -                                           | UKBB     | European | 0.010  | 0.002 | 1.06E-06 | 332021 | 0       | 1         | -         | 3.45E-04 |
| rs3749833 | rs10067603 | 5:131803868 G A  | Allergic disease                                                                              | EFO_0003785                                 | 29083406 | European | -0.032 | 0.007 | 2.34E-06 | 360838 | 180129  | 13        | log OR    | 7.11E-04 |

| sentinel  | SNP        | chr_bp_eff_other | trait                                                                                                 | efo                                         | pmid     | ancestry | beta   | se    | p        | n      | n_cases | n_studies | unit      | FDR      |
|-----------|------------|------------------|-------------------------------------------------------------------------------------------------------|---------------------------------------------|----------|----------|--------|-------|----------|--------|---------|-----------|-----------|----------|
| rs3749833 | rs10067603 | 5:131803868_G_A  | Hayfever, allergic rhinitis or eczema                                                                 | EFO_0003956;<br>EFO_0005854;<br>EFO_0000274 | UKBB     | European | -0.006 | 0.001 | 3.09E-06 | 336782 | 77891   | 1         | risk diff | 9.11E-04 |
| rs3749833 | rs10067603 | 5:131803868_G_A  | Platelet count                                                                                        | EFO_0004586                                 | 27863252 | European | -0.019 | 0.004 | 7.82E-06 | 173480 | 0       | 2         | IVNT      | 2.08E-03 |
| rs3749833 | rs10067603 | 5:131803868_G_A  | Treatment with vitamin a+d capsule                                                                    | EFO_0007056                                 | UKBB     | European | 0.000  | 0.000 | 1.03E-05 | 337159 | 53      | 1         | risk diff | 2.65E-03 |
| rs3749833 | rs10067603 | 5:131803868_G_A  | Monocyte count                                                                                        | EFO_0004586                                 | 27863252 | European | -0.018 | 0.004 | 2.28E-05 | 173480 | 0       | 2         | IVNT      | 5.33E-03 |
| rs3749833 | rs10067603 | 5:131803868_G_A  | Self-reported nasal polyps                                                                            | EFO_1000391                                 | UKBB     | European | -0.001 | 0.000 | 2.90E-05 | 337159 | 1489    | 1         | risk diff | 6.54E-03 |
| rs3749833 | rs10067603 | 5:131803868_G_A  | Leg fat-free mass left                                                                                | -                                           | UKBB     | European | 0.008  | 0.002 | 3.20E-05 | 331258 | 0       | 1         | IVNT      | 7.07E-03 |
| rs3749833 | rs10067603 | 5:131803868_G_A  | Neutrophil percentage of white cells                                                                  | EFO_0004586                                 | 27863252 | European | -0.018 | 0.004 | 3.32E-05 | 173480 | 0       | 2         | IVNT      | 7.30E-03 |
| rs3749833 | rs10067603 | 5:131803868_G_A  | Leg predicted mass left                                                                               | -                                           | UKBB     | European | 0.008  | 0.002 | 3.54E-05 | 331253 | 0       | 1         | IVNT      | 7.74E-03 |
| rs3749833 | rs10067603 | 5:131803868_G_A  | Doctor diagnosed asthma                                                                               | EFO_0000270                                 | UKBB     | European | -0.008 | 0.002 | 3.74E-05 | 83529  | 10589   | 1         | risk diff | 8.10E-03 |
| rs3749833 | rs10067603 | 5:131803868_G_A  | Leg fat-free mass right                                                                               | -                                           | UKBB     | European | 0.008  | 0.002 | 3.89E-05 | 331285 | 0       | 1         | IVNT      | 8.37E-03 |
| rs3749833 | rs10067603 | 5:131803868_G_A  | Leg predicted mass right                                                                              | -                                           | UKBB     | European | 0.008  | 0.002 | 4.37E-05 | 331285 | 0       | 1         | IVNT      | 9.33E-03 |
| rs3749833 | rs10067603 | 5:131803868_G_A  | Lung function ratio of forced expiratory volume in 1 second FEV1 to forced vital capacity FVC FEV1FVC | NCIT_C38084;<br>NCIT_C111359                | 20010835 | European | NA     | NA    | 4.54E-05 | 20890  | -       | -         | -         | 9.61E-03 |
| rs3749833 | rs10060626 | 5:131803967_G_T  | Self-reported asthma                                                                                  | EFO_0000270                                 | UKBB     | European | 0.008  | 0.001 | 1.99E-19 | 337159 | 39049   | 1         | risk diff | 9.85E-16 |
| rs3749833 | rs10060626 | 5:131803967_G_T  | Asthma                                                                                                | EFO_0000270                                 | UKBB     | European | 0.008  | 0.001 | 7.09E-18 | 336782 | 38791   | 1         | risk diff | 2.73E-14 |
| rs3749833 | rs10060626 | 5:131803967_G_T  | Mean platelet volume                                                                                  | EFO_0004586                                 | 27863252 | European | -0.032 | 0.004 | 4.43E-14 | 173480 | 0       | 2         | IVNT      | 8.84E-11 |
| rs3749833 | rs10060626 | 5:131803967_G_T  | Crohns disease                                                                                        | EFO_0000384                                 | 26192919 | European | -0.213 | 0.030 | 6.97E-13 | 20883  | 5956    | 7         | log OR    | 1.00E-09 |
| rs3749833 | rs10060626 | 5:131803967_G_T  | No blood clot, bronchitis, emphysema, asthma, rhinitis, eczema or allergy diagnosed by doctor         | -                                           | UKBB     | European | -0.009 | 0.001 | 1.40E-12 | 336782 | 228530  | 1         | risk diff | 1.74E-09 |
| rs3749833 | rs10060626 | 5:131803967_G_T  | Height                                                                                                | EFO_0004339                                 | UKBB     | European | -0.014 | 0.002 | 1.88E-11 | 336474 | 0       | 1         | IVNT      | 1.86E-08 |
| rs3749833 | rs10060626 | 5:131803967_G_T  | Sum eosinophil basophil counts                                                                        | EFO_0004586                                 | 27863252 | European | 0.028  | 0.004 | 7.90E-11 | 173480 | 0       | 2         | IVNT      | 6.64E-08 |
| rs3749833 | rs10060626 | 5:131803967_G_T  | Myeloid white cell count                                                                              | EFO_0004586                                 | 27863252 | European | 0.028  | 0.004 | 9.62E-11 | 173480 | 0       | 2         | IVNT      | 7.96E-08 |
| rs3749833 | rs10060626 | 5:131803967_G_T  | Granulocyte count                                                                                     | EFO_0004586                                 | 27863252 | European | 0.027  | 0.004 | 2.64E-10 | 173480 | 0       | 2         | IVNT      | 2.03E-07 |
| rs3749833 | rs10060626 | 5:131803967_G_T  | Sum neutrophil eosinophil counts                                                                      | EFO_0004586                                 | 27863252 | European | 0.026  | 0.004 | 6.72E-10 | 173480 | 0       | 2         | IVNT      | 4.78E-07 |
| rs3749833 | rs10060626 | 5:131803967_G_T  | Lymphocyte percentage of white cells                                                                  | EFO_0004586                                 | 27863252 | European | -0.026 | 0.004 | 7.19E-10 | 173480 | 0       | 2         | IVNT      | 5.06E-07 |
| rs3749833 | rs10060626 | 5:131803967_G_T  | Eosinophil count                                                                                      | EFO_0004586                                 | 27863252 | European | 0.026  | 0.004 | 1.15E-09 | 173480 | 0       | 2         | IVNT      | 7.42E-07 |
| rs3749833 | rs10060626 | 5:131803967_G_T  | Inflammatory bowel disease                                                                            | EFO_0003767                                 | 26192919 | European | -0.128 | 0.021 | 1.32E-09 | 34652  | 12882   | 15        | log OR    | 8.30E-07 |
| rs3749833 | rs10060626 | 5:131803967_G_T  | Sum basophil neutrophil counts                                                                        | EFO_0004586                                 | 27863252 | European | 0.025  | 0.004 | 4.56E-09 | 173480 | 0       | 2         | IVNT      | 2.46E-06 |
| rs3749833 | rs10060626 | 5:131803967_G_T  | Neutrophil count                                                                                      | EFO_0004586                                 | 27863252 | European | 0.024  | 0.004 | 1.25E-08 | 173480 | 0       | 2         | IVNT      | 6.25E-06 |
| rs3749833 | rs10060626 | 5:131803967_G_T  | White blood cell count                                                                                | EFO_0004586                                 | 27863252 | European | 0.021  | 0.004 | 5.35E-07 | 173480 | 0       | 2         | IVNT      | 1.91E-04 |
| rs3749833 | rs10060626 | 5:131803967_G_T  | Comparative height size at age 10                                                                     | -                                           | UKBB     | European | -0.010 | 0.002 | 8.85E-07 | 332021 | 0       | 1         | -         | 2.97E-04 |
| rs3749833 | rs10060626 | 5:131803967_G_T  | Allergic disease                                                                                      | EFO_0003785                                 | 29083406 | European | 0.032  | 0.007 | 3.12E-06 | 360838 | 180129  | 13        | log OR    | 9.19E-04 |
| rs3749833 | rs10060626 | 5:131803967_G_T  | Hayfever, allergic rhinitis or eczema                                                                 | EFO_0003956;<br>EFO_0005854;<br>EFO_0000274 | UKBB     | European | 0.006  | 0.001 | 3.21E-06 | 336782 | 77891   | 1         | risk diff | 9.42E-04 |
| rs3749833 | rs10060626 | 5:131803967_G_T  | Eosinophil percentage of white cells                                                                  | EFO_0004586                                 | 27863252 | European | 0.019  | 0.004 | 4.89E-06 | 173480 | 0       | 2         | IVNT      | 1.38E-03 |
| rs3749833 | rs10060626 | 5:131803967_G_T  | Platelet count                                                                                        | EFO_0004586                                 | 27863252 | European | 0.019  | 0.004 | 6.70E-06 | 173480 | 0       | 2         | IVNT      | 1.83E-03 |
| rs3749833 | rs10060626 | 5:131803967_G_T  | Neutrophil percentage of white cells                                                                  | EFO_0004586                                 | 27863252 | European | 0.019  | 0.004 | 1.11E-05 | 173480 | 0       | 2         | IVNT      | 2.81E-03 |
| rs3749833 | rs10060626 | 5:131803967_G_T  | Treatment with vitamin a+d capsule                                                                    | EFO_0007056                                 | UKBB     | European | 0.000  | 0.000 | 2.36E-05 | 337159 | 53      | 1         | risk diff | 5.49E-03 |
| rs3749833 | rs10060626 | 5:131803967_G_T  | Leg fat-free mass left                                                                                | -                                           | UKBB     | European | -0.008 | 0.002 | 4.45E-05 | 331258 | 0       | 1         | IVNT      | 9.47E-03 |
| rs3749833 | rs10039559 | 5:131804507_C_T  | Self-reported asthma                                                                                  | EFO_0000270                                 | UKBB     | European | 0.008  | 0.001 | 1.88E-19 | 337159 | 39049   | 1         | risk diff | 9.48E-16 |
| rs3749833 | rs10039559 | 5:131804507_C_T  | Asthma                                                                                                | EFO_0000270                                 | UKBB     | European | 0.008  | 0.001 | 6.68E-18 | 336782 | 38791   | 1         | risk diff | 2.61E-14 |
| rs3749833 | rs10039559 | 5:131804507_C_T  | Mean platelet volume                                                                                  | EFO_0004586                                 | 27863252 | European | -0.033 | 0.004 | 2.91E-14 | 173480 | 0       | 2         | IVNT      | 6.15E-11 |
| rs3749833 | rs10039559 | 5:131804507_C_T  | Crohns disease                                                                                        | EFO_0000384                                 | 23128233 | European | NA     | NA    | 6.60E-14 | 14342  | 6299    | 7         | log OR    | 1.24E-10 |
| rs3749833 | rs10039559 | 5:131804507_C_T  | Crohns disease                                                                                        | EFO_0000384                                 | 26192919 | European | -0.216 | 0.030 | 2.75E-13 | 20883  | 5956    | 7         | log OR    | 4.49E-10 |

| sentinel  | SNP        | chr_bp_eff_other | trait                                                                                                 | efo                                         | pmid     | ancestry | beta   | se    | p        | n      | n_cases | n_studies | unit      | FDR      |
|-----------|------------|------------------|-------------------------------------------------------------------------------------------------------|---------------------------------------------|----------|----------|--------|-------|----------|--------|---------|-----------|-----------|----------|
| rs3749833 | rs10039559 | 5:131804507_C_T  | No blood clot, bronchitis, emphysema, asthma, rhinitis, eczema or allergy diagnosed by doctor         | -                                           | UKBB     | European | -0.010 | 0.001 | 1.32E-12 | 336782 | 228530  | 1         | risk diff | 1.67E-09 |
| rs3749833 | rs10039559 | 5:131804507_C_T  | Sum eosinophil basophil counts                                                                        | EFO_0004586                                 | 27863252 | European | 0.029  | 0.004 | 4.89E-12 | 173480 | 0       | 2         | IVNT      | 5.37E-09 |
| rs3749833 | rs10039559 | 5:131804507_C_T  | Height                                                                                                | EFO_0004339                                 | UKBB     | European | -0.014 | 0.002 | 1.68E-11 | 336474 | 0       | 1         | IVNT      | 1.68E-08 |
| rs3749833 | rs10039559 | 5:131804507_C_T  | Eosinophil count                                                                                      | EFO_0004586                                 | 27863252 | European | 0.027  | 0.004 | 7.75E-11 | 173480 | 0       | 2         | IVNT      | 6.56E-08 |
| rs3749833 | rs10039559 | 5:131804507_C_T  | Myeloid white cell count                                                                              | EFO_0004586                                 | 27863252 | European | 0.027  | 0.004 | 1.09E-10 | 173480 | 0       | 2         | IVNT      | 8.91E-08 |
| rs3749833 | rs10039559 | 5:131804507_C_T  | Granulocyte count                                                                                     | EFO_0004586                                 | 27863252 | European | 0.027  | 0.004 | 3.56E-10 | 173480 | 0       | 2         | IVNT      | 2.66E-07 |
| rs3749833 | rs10039559 | 5:131804507_C_T  | Sum neutrophil eosinophil counts                                                                      | EFO_0004586                                 | 27863252 | European | 0.026  | 0.004 | 9.08E-10 | 173480 | 0       | 2         | IVNT      | 6.16E-07 |
| rs3749833 | rs10039559 | 5:131804507_C_T  | Inflammatory bowel disease                                                                            | EFO_0003767                                 | 26192919 | European | -0.127 | 0.021 | 1.25E-09 | 34652  | 12882   | 15        | log OR    | 7.97E-07 |
| rs3749833 | rs10039559 | 5:131804507_C_T  | Lymphocyte percentage of white cells                                                                  | EFO_0004586                                 | 27863252 | European | -0.025 | 0.004 | 1.57E-09 | 173480 | 0       | 2         | IVNT      | 9.60E-07 |
| rs3749833 | rs10039559 | 5:131804507_C_T  | Sum basophil neutrophil counts                                                                        | EFO_0004586                                 | 27863252 | European | 0.025  | 0.004 | 7.78E-09 | 173480 | 0       | 2         | IVNT      | 4.00E-06 |
| rs3749833 | rs10039559 | 5:131804507_C_T  | Asthma                                                                                                | EFO_0000270                                 | 29273806 | European | 0.083  | 0.015 | 1.82E-08 | 127669 | 19954   | 56        | log OR    | 8.82E-06 |
| rs3749833 | rs10039559 | 5:131804507_C_T  | Neutrophil count                                                                                      | EFO_0004586                                 | 27863252 | European | 0.024  | 0.004 | 2.12E-08 | 173480 | 0       | 2         | IVNT      | 1.02E-05 |
| rs3749833 | rs10039559 | 5:131804507_C_T  | Asthma                                                                                                | EFO_0000270                                 | 29273806 | Mixed    | 0.078  | 0.014 | 4.16E-08 | 142486 | 23948   | 66        | log OR    | 1.88E-05 |
| rs3749833 | rs10039559 | 5:131804507_C_T  | White blood cell count                                                                                | EFO_0004586                                 | 27863252 | European | 0.021  | 0.004 | 4.03E-07 | 173480 | 0       | 2         | IVNT      | 1.47E-04 |
| rs3749833 | rs10039559 | 5:131804507_C_T  | Eosinophil percentage of white cells                                                                  | EFO_0004586                                 | 27863252 | European | 0.021  | 0.004 | 5.84E-07 | 173480 | 0       | 2         | IVNT      | 2.06E-04 |
| rs3749833 | rs10039559 | 5:131804507_C_T  | Comparative height size at age 10                                                                     | -                                           | UKBB     | European | -0.010 | 0.002 | 1.01E-06 | 332021 | 0       | 1         | -         | 3.30E-04 |
| rs3749833 | rs10039559 | 5:131804507_C_T  | Allergic disease                                                                                      | EFO_0003785                                 | 29083406 | European | 0.032  | 0.007 | 3.26E-06 | 360838 | 180129  | 13        | log OR    | 9.55E-04 |
| rs3749833 | rs10039559 | 5:131804507_C_T  | Hayfever, allergic rhinitis or eczema                                                                 | EFO_0003956;<br>EFO_0005854;<br>EFO_0000274 | UKBB     | European | 0.006  | 0.001 | 3.26E-06 | 336782 | 77891   | 1         | risk diff | 9.56E-04 |
| rs3749833 | rs10039559 | 5:131804507_C_T  | Platelet count                                                                                        | EFO_0004586                                 | 27863252 | European | 0.019  | 0.004 | 9.00E-06 | 173480 | 0       | 2         | IVNT      | 2.37E-03 |
| rs3749833 | rs10039559 | 5:131804507_C_T  | Asthma                                                                                                | EFO_0000270                                 | 20860503 | European | 0.104  | 0.024 | 9.62E-06 | 26475  | 10365   | 24        | log OR    | 2.49E-03 |
| rs3749833 | rs10039559 | 5:131804507_C_T  | Asthma                                                                                                | EFO_0000270                                 | 20860503 | European | NA     | NA    | 9.62E-06 | 26475  | -       | -         | -         | 2.49E-03 |
| rs3749833 | rs10039559 | 5:131804507_C_T  | Treatment with vitamin a+d capsule                                                                    | EFO_0007056                                 | UKBB     | European | 0.000  | 0.000 | 1.04E-05 | 337159 | 53      | 1         | risk diff | 2.67E-03 |
| rs3749833 | rs10039559 | 5:131804507_C_T  | Monocyte count                                                                                        | EFO_0004586                                 | 27863252 | European | 0.018  | 0.004 | 2.91E-05 | 173480 | 0       | 2         | IVNT      | 6.54E-03 |
| rs3749833 | rs10039559 | 5:131804507_C_T  | Neutrophil percentage of white cells                                                                  | EFO_0004586                                 | 27863252 | European | 0.018  | 0.004 | 3.12E-05 | 173480 | 0       | 2         | IVNT      | 6.91E-03 |
| rs3749833 | rs10039559 | 5:131804507_C_T  | Self-reported nasal polyps                                                                            | EFO_1000391                                 | UKBB     | European | 0.001  | 0.000 | 3.71E-05 | 337159 | 1489    | 1         | risk diff | 8.04E-03 |
| rs3749833 | rs10039559 | 5:131804507_C_T  | Leg fat-free mass left                                                                                | -                                           | UKBB     | European | -0.008 | 0.002 | 4.04E-05 | 331258 | 0       | 1         | IVNT      | 8.67E-03 |
| rs3749833 | rs10039559 | 5:131804507_C_T  | Leg predicted mass left                                                                               | -                                           | UKBB     | European | -0.008 | 0.002 | 4.41E-05 | 331253 | 0       | 1         | IVNT      | 9.39E-03 |
| rs3749833 | rs10039559 | 5:131804507_C_T  | Lung function ratio of forced expiratory volume in 1 second FEV1 to forced vital capacity FVC FEV1FVC | NCIT_C38084;<br>NCIT_C111359                | 20010835 | European | NA     | NA    | 4.48E-05 | 20890  | -       | -         | -         | 9.51E-03 |
| rs3749833 | rs10039559 | 5:131804507_C_T  | Doctor diagnosed asthma                                                                               | EFO_0000270                                 | UKBB     | European | 0.008  | 0.002 | 4.52E-05 | 83529  | 10589   | 1         | risk diff | 9.58E-03 |
| rs3749833 | rs3846729  | 5:131806768_C_G  | Self-reported asthma                                                                                  | EFO_0000270                                 | UKBB     | European | 0.008  | 0.001 | 1.58E-19 | 337159 | 39049   | 1         | risk diff | 8.32E-16 |
| rs3749833 | rs3846729  | 5:131806768_C_G  | Asthma                                                                                                | EFO_0000270                                 | UKBB     | European | 0.008  | 0.001 | 5.69E-18 | 336782 | 38791   | 1         | risk diff | 2.25E-14 |
| rs3749833 | rs3846729  | 5:131806768_C_G  | Mean platelet volume                                                                                  | EFO_0004586                                 | 27863252 | European | -0.032 | 0.004 | 4.08E-14 | 173480 | 0       | 2         | IVNT      | 8.27E-11 |
| rs3749833 | rs3846729  | 5:131806768_C_G  | Crohns disease                                                                                        | EFO_0000384                                 | 26192919 | European | -0.217 | 0.030 | 2.62E-13 | 20883  | 5956    | 7         | log OR    | 4.30E-10 |
| rs3749833 | rs3846729  | 5:131806768_C_G  | No blood clot, bronchitis, emphysema, asthma, rhinitis, eczema or allergy diagnosed by doctor         | -                                           | UKBB     | European | -0.010 | 0.001 | 1.59E-12 | 336782 | 228530  | 1         | risk diff | 1.93E-09 |
| rs3749833 | rs3846729  | 5:131806768_C_G  | Sum eosinophil basophil counts                                                                        | EFO_0004586                                 | 27863252 | European | 0.029  | 0.004 | 4.06E-12 | 173480 | 0       | 2         | IVNT      | 4.51E-09 |
| rs3749833 | rs3846729  | 5:131806768_C_G  | Height                                                                                                | EFO_0004339                                 | UKBB     | European | -0.014 | 0.002 | 1.37E-11 | 336474 | 0       | 1         | IVNT      | 1.39E-08 |
| rs3749833 | rs3846729  | 5:131806768_C_G  | Eosinophil count                                                                                      | EFO_0004586                                 | 27863252 | European | 0.028  | 0.004 | 5.69E-11 | 173480 | 0       | 2         | IVNT      | 5.00E-08 |
| rs3749833 | rs3846729  | 5:131806768_C_G  | Myeloid white cell count                                                                              | EFO_0004586                                 | 27863252 | European | 0.028  | 0.004 | 7.85E-11 | 173480 | 0       | 2         | IVNT      | 6.63E-08 |
| rs3749833 | rs3846729  | 5:131806768_C_G  | Granulocyte count                                                                                     | EFO_0004586                                 | 27863252 | European | 0.027  | 0.004 | 2.52E-10 | 173480 | 0       | 2         | IVNT      | 1.95E-07 |
| rs3749833 | rs3846729  | 5:131806768_C_G  | Sum neutrophil eosinophil counts                                                                      | EFO_0004586                                 | 27863252 | European | 0.026  | 0.004 | 6.44E-10 | 173480 | 0       | 2         | IVNT      | 4.60E-07 |
| rs3749833 | rs3846729  | 5:131806768_C_G  | Inflammatory bowel disease                                                                            | EFO_0003767                                 | 26192919 | European | -0.128 | 0.021 | 1.25E-09 | 34652  | 12882   | 15        | log OR    | 7.97E-07 |
| rs3749833 | rs3846729  | 5:131806768_C_G  | Lymphocyte percentage of white cells                                                                  | EFO_0004586                                 | 27863252 | European | -0.026 | 0.004 | 1.35E-09 | 173480 | 0       | 2         | IVNT      | 8.45E-07 |
| rs3749833 | rs3846729  | 5:131806768_C_G  | Sum basophil neutrophil counts                                                                        | EFO_0004586                                 | 27863252 | European | 0.025  | 0.004 | 5.57E-09 | 173480 | 0       | 2         | IVNT      | 2.95E-06 |

| sentinel  | SNP       | chr_bp_eff_other | trait                                                                                         | efo                                         | pmid     | ancestry | beta   | se    | p        | n      | n_cases | n_studies | unit      | FDR      |
|-----------|-----------|------------------|-----------------------------------------------------------------------------------------------|---------------------------------------------|----------|----------|--------|-------|----------|--------|---------|-----------|-----------|----------|
| rs3749833 | rs3846729 | 5:131806768_C_G  | Neutrophil count                                                                              | EFO_0004586                                 | 27863252 | European | 0.024  | 0.004 | 1.53E-08 | 173480 | 0       | 2         | IVNT      | 7.48E-06 |
| rs3749833 | rs3846729 | 5:131806768_C_G  | White blood cell count                                                                        | EFO_0004586                                 | 27863252 | European | 0.022  | 0.004 | 3.14E-07 | 173480 | 0       | 2         | IVNT      | 1.18E-04 |
| rs3749833 | rs3846729 | 5:131806768_C_G  | Eosinophil percentage of white cells                                                          | EFO_0004586                                 | 27863252 | European | 0.021  | 0.004 | 4.79E-07 | 173480 | 0       | 2         | IVNT      | 1.72E-04 |
| rs3749833 | rs3846729 | 5:131806768_C_G  | Comparative height size at age 10                                                             | -                                           | UKBB     | European | -0.010 | 0.002 | 9.53E-07 | 332021 | 0       | 1         | -         | 3.15E-04 |
| rs3749833 | rs3846729 | 5:131806768_C_G  | Allergic disease                                                                              | EFO_0003785                                 | 29083406 | European | 0.032  | 0.007 | 2.12E-06 | 360838 | 180129  | 13        | log OR    | 6.50E-04 |
| rs3749833 | rs3846729 | 5:131806768_C_G  | Hayfever, allergic rhinitis or eczema                                                         | EFO_0003956;<br>EFO_0005854;<br>EFO_0000274 | UKBB     | European | 0.006  | 0.001 | 3.97E-06 | 336782 | 77891   | 1         | risk diff | 1.14E-03 |
| rs3749833 | rs3846729 | 5:131806768_C_G  | Platelet count                                                                                | EFO_0004586                                 | 27863252 | European | 0.019  | 0.004 | 8.53E-06 | 173480 | 0       | 2         | IVNT      | 2.26E-03 |
| rs3749833 | rs3846729 | 5:131806768_C_G  | Treatment with vitamin a+d capsule                                                            | EFO_0007056                                 | UKBB     | European | 0.000  | 0.000 | 1.04E-05 | 337159 | 53      | 1         | risk diff | 2.67E-03 |
| rs3749833 | rs3846729 | 5:131806768_C_G  | Height                                                                                        | EFO_0004339                                 | 25282103 | European | -0.015 | 0.004 | 2.50E-05 | 253280 | 0       | 79        | Z-score   | 5.76E-03 |
| rs3749833 | rs3846729 | 5:131806768_C_G  | Neutrophil percentage of white cells                                                          | EFO_0004586                                 | 27863252 | European | 0.018  | 0.004 | 2.53E-05 | 173480 | 0       | 2         | IVNT      | 5.80E-03 |
| rs3749833 | rs3846729 | 5:131806768_C_G  | Leg fat-free mass left                                                                        | -                                           | UKBB     | European | -0.008 | 0.002 | 2.83E-05 | 331258 | 0       | 1         | IVNT      | 6.43E-03 |
| rs3749833 | rs3846729 | 5:131806768_C_G  | Self-reported nasal polyps                                                                    | EFO_1000391                                 | UKBB     | European | 0.001  | 0.000 | 2.99E-05 | 337159 | 1489    | 1         | risk diff | 6.70E-03 |
| rs3749833 | rs3846729 | 5:131806768_C_G  | Leg predicted mass left                                                                       | -                                           | UKBB     | European | -0.008 | 0.002 | 3.08E-05 | 331253 | 0       | 1         | IVNT      | 6.87E-03 |
| rs3749833 | rs3846729 | 5:131806768_C_G  | Monocyte count                                                                                | EFO_0004586                                 | 27863252 | European | 0.018  | 0.004 | 3.29E-05 | 173480 | 0       | 2         | IVNT      | 7.24E-03 |
| rs3749833 | rs3846729 | 5:131806768_C_G  | Leg fat-free mass right                                                                       | -                                           | UKBB     | European | -0.008 | 0.002 | 3.64E-05 | 331285 | 0       | 1         | IVNT      | 7.92E-03 |
| rs3749833 | rs3846729 | 5:131806768_C_G  | Leg predicted mass right                                                                      | -                                           | UKBB     | European | -0.008 | 0.002 | 4.04E-05 | 331285 | 0       | 1         | IVNT      | 8.67E-03 |
| rs3749833 | rs3846729 | 5:131806768_C_G  | Doctor diagnosed asthma                                                                       | EFO_0000270                                 | UKBB     | European | 0.008  | 0.002 | 4.60E-05 | 83529  | 10589   | 1         | risk diff | 9.73E-03 |
| rs3749833 | rs2548993 | 5:131808869_A_G  | Self-reported asthma                                                                          | EFO_0000270                                 | UKBB     | European | -0.009 | 0.001 | 8.92E-23 | 337159 | 39049   | 1         | risk diff | 8.20E-19 |
| rs3749833 | rs2548993 | 5:131808869_A_G  | Asthma                                                                                        | EFO_0000270                                 | UKBB     | European | -0.008 | 0.001 | 7.46E-22 | 336782 | 38791   | 1         | risk diff | 5.82E-18 |
| rs3749833 | rs2548993 | 5:131808869_A_G  | Sum eosinophil basophil counts                                                                | EFO_0004586                                 | 27863252 | European | -0.037 | 0.004 | 3.65E-20 | 173480 | 0       | 2         | IVNT      | 2.19E-16 |
| rs3749833 | rs2548993 | 5:131808869_A_G  | Eosinophil count                                                                              | EFO_0004586                                 | 27863252 | European | -0.035 | 0.004 | 8.76E-19 | 173480 | 0       | 2         | IVNT      | 3.82E-15 |
| rs3749833 | rs2548993 | 5:131808869_A_G  | Crohns disease                                                                                | EFO_0000384                                 | 23128233 | European | NA     | NA    | 4.60E-17 | 14342  | 6299    | 7         | log OR    | 1.54E-13 |
| rs3749833 | rs2548993 | 5:131808869_A_G  | Height                                                                                        | EFO_0004339                                 | UKBB     | European | 0.016  | 0.002 | 6.43E-17 | 336474 | 0       | 1         | IVNT      | 2.12E-13 |
| rs3749833 | rs2548993 | 5:131808869_A_G  | Crohns disease                                                                                | EFO_0000384                                 | 26192919 | European | 0.227  | 0.028 | 4.67E-16 | 20883  | 5956    | 7         | log OR    | 1.41E-12 |
| rs3749833 | rs2548993 | 5:131808869_A_G  | Mean platelet volume                                                                          | EFO_0004586                                 | 27863252 | European | 0.033  | 0.004 | 4.75E-16 | 173480 | 0       | 2         | IVNT      | 1.42E-12 |
| rs3749833 | rs2548993 | 5:131808869_A_G  | Myeloid white cell count                                                                      | EFO_0004586                                 | 27863252 | European | -0.030 | 0.004 | 5.86E-14 | 173480 | 0       | 2         | IVNT      | 1.16E-10 |
| rs3749833 | rs2548993 | 5:131808869_A_G  | Granulocyte count                                                                             | EFO_0004586                                 | 27863252 | European | -0.030 | 0.004 | 1.36E-13 | 173480 | 0       | 2         | IVNT      | 2.41E-10 |
| rs3749833 | rs2548993 | 5:131808869_A_G  | No blood clot, bronchitis, emphysema, asthma, rhinitis, eczema or allergy diagnosed by doctor | -                                           | UKBB     | European | 0.009  | 0.001 | 2.94E-13 | 336782 | 228530  | 1         | risk diff | 4.73E-10 |
| rs3749833 | rs2548993 | 5:131808869_A_G  | Sum neutrophil eosinophil counts                                                              | EFO_0004586                                 | 27863252 | European | -0.029 | 0.004 | 4.87E-13 | 173480 | 0       | 2         | IVNT      | 7.12E-10 |
| rs3749833 | rs2548993 | 5:131808869_A_G  | Eosinophil percentage of white cells                                                          | EFO_0004586                                 | 27863252 | European | -0.028 | 0.004 | 1.56E-12 | 173480 | 0       | 2         | IVNT      | 1.90E-09 |
| rs3749833 | rs2548993 | 5:131808869_A_G  | Sum basophil neutrophil counts                                                                | EFO_0004586                                 | 27863252 | European | -0.027 | 0.004 | 1.80E-11 | 173480 | 0       | 2         | IVNT      | 1.79E-08 |
| rs3749833 | rs2548993 | 5:131808869_A_G  | Inflammatory bowel disease                                                                    | EFO_0003767                                 | 26192919 | European | 0.133  | 0.020 | 2.39E-11 | 34652  | 12882   | 15        | log OR    | 2.32E-08 |
| rs3749833 | rs2548993 | 5:131808869_A_G  | Neutrophil count                                                                              | EFO_0004586                                 | 27863252 | European | -0.026 | 0.004 | 7.38E-11 | 173480 | 0       | 2         | IVNT      | 6.31E-08 |
| rs3749833 | rs2548993 | 5:131808869_A_G  | Lymphocyte percentage of white cells                                                          | EFO_0004586                                 | 27863252 | European | 0.026  | 0.004 | 1.18E-10 | 173480 | 0       | 2         | IVNT      | 9.55E-08 |
| rs3749833 | rs2548993 | 5:131808869_A_G  | White blood cell count                                                                        | EFO_0004586                                 | 27863252 | European | -0.025 | 0.004 | 5.77E-10 | 173480 | 0       | 2         | IVNT      | 4.16E-07 |
| rs3749833 | rs2548993 | 5:131808869_A_G  | Asthma                                                                                        | EFO_0000270                                 | 29273806 | Mixed    | -0.080 | 0.013 | 1.60E-09 | 142486 | 23948   | 66        | log OR    | 9.67E-07 |
| rs3749833 | rs2548993 | 5:131808869_A_G  | Asthma                                                                                        | EFO_0000270                                 | 29273806 | European | -0.085 | 0.014 | 3.57E-09 | 127669 | 19954   | 56        | log OR    | 2.01E-06 |
| rs3749833 | rs2548993 | 5:131808869_A_G  | Comparative height size at age 10                                                             | -                                           | UKBB     | European | 0.011  | 0.002 | 6.90E-09 | 332021 | 0       | 1         | -         | 3.58E-06 |
| rs3749833 | rs2548993 | 5:131808869_A_G  | Eosinophil percentage of granulocytes                                                         | EFO_0004586                                 | 27863252 | European | -0.022 | 0.004 | 4.24E-08 | 173480 | 0       | 2         | IVNT      | 1.92E-05 |
| rs3749833 | rs2548993 | 5:131808869_A_G  | Sitting height                                                                                | EFO_0004339                                 | UKBB     | European | 0.011  | 0.002 | 4.84E-08 | 336172 | 0       | 1         | IVNT      | 2.16E-05 |
| rs3749833 | rs2548993 | 5:131808869_A_G  | Neutrophil percentage of granulocytes                                                         | EFO_0004586                                 | 27863252 | European | 0.022  | 0.004 | 6.02E-08 | 173480 | 0       | 2         | IVNT      | 2.64E-05 |
| rs3749833 | rs2548993 | 5:131808869_A_G  | Leg predicted mass right                                                                      | -                                           | UKBB     | European | 0.009  | 0.002 | 1.19E-07 | 331285 | 0       | 1         | IVNT      | 4.78E-05 |
| rs3749833 | rs2548993 | 5:131808869_A_G  | Leg fat-free mass right                                                                       | -                                           | UKBB     | European | 0.009  | 0.002 | 1.27E-07 | 331285 | 0       | 1         | IVNT      | 5.08E-05 |
| rs3749833 | rs2548993 | 5:131808869_A_G  | Leg predicted mass left                                                                       | -                                           | UKBB     | European | 0.009  | 0.002 | 1.43E-07 | 331253 | 0       | 1         | IVNT      | 5.65E-05 |
| rs3749833 | rs2548993 | 5:131808869_A_G  | Leg fat-free mass left                                                                        | -                                           | UKBB     | European | 0.009  | 0.002 | 1.46E-07 | 331258 | 0       | 1         | IVNT      | 5.78E-05 |
| rs3749833 | rs2548993 | 5:131808869_A_G  | Height                                                                                        | EFO_0004339                                 | 25282103 | European | 0.018  | 0.003 | 1.70E-07 | 253280 | 0       | 79        | Z-score   | 6.65E-05 |

| sentinel  | SNP       | chr_bp_eff_other | trait                                                                                         | efo                                         | pmid     | ancestry | beta   | se    | p        | n      | n_cases | n_studies | unit      | FDR      |
|-----------|-----------|------------------|-----------------------------------------------------------------------------------------------|---------------------------------------------|----------|----------|--------|-------|----------|--------|---------|-----------|-----------|----------|
| rs3749833 | rs2548993 | 5:131808869 A G  | Whole body water mass                                                                         | -                                           | UKBB     | European | 0.009  | 0.002 | 1.83E-07 | 331315 | 0       | 1         | IVNT      | 7.09E-05 |
| rs3749833 | rs2548993 | 5:131808869 A G  | Whole body fat-free mass                                                                      | -                                           | UKBB     | European | 0.009  | 0.002 | 2.52E-07 | 331291 | 0       | 1         | IVNT      | 9.57E-05 |
| rs3749833 | rs2548993 | 5:131808869 A G  | Allergic disease                                                                              | EFO_0003785                                 | 29083406 | European | -0.033 | 0.006 | 3.34E-07 | 360838 | 180129  | 13        | log OR    | 1.24E-04 |
| rs3749833 | rs2548993 | 5:131808869 A G  | Basal metabolic rate                                                                          | EFO_0007777                                 | UKBB     | European | 0.009  | 0.002 | 4.18E-07 | 331307 | 0       | 1         | IVNT      | 1.52E-04 |
| rs3749833 | rs2548993 | 5:131808869 A G  | Trunk fat-free mass                                                                           | -                                           | UKBB     | European | 0.009  | 0.002 | 5.60E-07 | 331030 | 0       | 1         | IVNT      | 1.99E-04 |
| rs3749833 | rs2548993 | 5:131808869 A G  | Trunk predicted mass                                                                          | -                                           | UKBB     | European | 0.009  | 0.002 | 6.19E-07 | 330995 | 0       | 1         | IVNT      | 2.16E-04 |
| rs3749833 | rs2548993 | 5:131808869 A G  | Doctor diagnosed asthma                                                                       | EFO_0000270                                 | UKBB     | European | -0.009 | 0.002 | 6.36E-07 | 83529  | 10589   | 1         | risk diff | 2.22E-04 |
| rs3749833 | rs2548993 | 5:131808869 A G  | Platelet count                                                                                | EFO_0004586                                 | 27863252 | European | -0.020 | 0.004 | 7.63E-07 | 173480 | 0       | 2         | IVNT      | 2.60E-04 |
| rs3749833 | rs2548993 | 5:131808869 A G  | Asthma                                                                                        | EFO_0000270                                 | 20860503 | European | -0.109 | 0.022 | 9.54E-07 | 26475  | 10365   | 24        | log OR    | 3.15E-04 |
| rs3749833 | rs2548993 | 5:131808869 A G  | Asthma                                                                                        | EFO_0000270                                 | 20860503 | European | NA     | NA    | 9.54E-07 | 26475  | -       | -         | -         | 3.15E-04 |
| rs3749833 | rs2548993 | 5:131808869_A_G  | Forced expiratory volume in 1-second, best measure                                            | EFO_0004314                                 | UKBB     | European | 0.012  | 0.003 | 3.37E-06 | 255492 | 0       | 1         | IVNT      | 9.83E-04 |
| rs3749833 | rs2548993 | 5:131808869 A G  | Monocyte count                                                                                | EFO_0004586                                 | 27863252 | European | -0.018 | 0.004 | 4.30E-06 | 173480 | 0       | 2         | IVNT      | 1.23E-03 |
| rs3749833 | rs2548993 | 5:131808869_A_G  | Hayfever, allergic rhinitis or eczema                                                         | EFO_0003956;<br>EFO_0005854;<br>EFO_0000274 | UKBB     | European | -0.005 | 0.001 | 4.77E-06 | 336782 | 77891   | 1         | risk diff | 1.35E-03 |
| rs3749833 | rs2548993 | 5:131808869 A G  | Self-reported nasal polyps                                                                    | EFO_1000391                                 | UKBB     | European | -0.001 | 0.000 | 5.22E-06 | 337159 | 1489    | 1         | risk diff | 1.46E-03 |
| rs3749833 | rs2548993 | 5:131808869 A G  | Arm fat-free mass left                                                                        | -                                           | UKBB     | European | 0.008  | 0.002 | 7.67E-06 | 331159 | 0       | 1         | IVNT      | 2.06E-03 |
| rs3749833 | rs2548993 | 5:131808869 A G  | Arm predicted mass left                                                                       | -                                           | UKBB     | European | 0.008  | 0.002 | 7.67E-06 | 331146 | 0       | 1         | IVNT      | 2.06E-03 |
| rs3749833 | rs2548993 | 5:131808869 A G  | Treatment with seretide 50 evohaler                                                           | EFO_0007056                                 | UKBB     | European | -0.001 | 0.000 | 1.09E-05 | 337159 | 3961    | 1         | risk diff | 2.76E-03 |
| rs3749833 | rs2548993 | 5:131808869 A G  | Neutrophil percentage of white cells                                                          | EFO_0004586                                 | 27863252 | European | -0.016 | 0.004 | 3.59E-05 | 173480 | 0       | 2         | IVNT      | 7.82E-03 |
| rs3749833 | rs2548993 | 5:131808869 A G  | Arm fat-free mass right                                                                       | -                                           | UKBB     | European | 0.007  | 0.002 | 3.76E-05 | 331221 | 0       | 1         | IVNT      | 8.12E-03 |
| rs3749833 | rs2057657 | 5:131809316 G A  | Self-reported asthma                                                                          | EFO_0000270                                 | UKBB     | European | -0.008 | 0.001 | 2.06E-19 | 337159 | 39049   | 1         | risk diff | 9.99E-16 |
| rs3749833 | rs2057657 | 5:131809316 G A  | Asthma                                                                                        | EFO_0000270                                 | UKBB     | European | -0.008 | 0.001 | 7.72E-18 | 336782 | 38791   | 1         | risk diff | 2.92E-14 |
| rs3749833 | rs2057657 | 5:131809316 G A  | Mean platelet volume                                                                          | EFO_0004586                                 | 27863252 | European | 0.032  | 0.004 | 3.17E-14 | 173480 | 0       | 2         | IVNT      | 6.59E-11 |
| rs3749833 | rs2057657 | 5:131809316 G A  | Crohns disease                                                                                | EFO_0000384                                 | 26192919 | European | 0.217  | 0.030 | 2.61E-13 | 20883  | 5956    | 7         | log OR    | 4.30E-10 |
| rs3749833 | rs2057657 | 5:131809316_G_A  | No blood clot, bronchitis, emphysema, asthma, rhinitis, eczema or allergy diagnosed by doctor | -                                           | UKBB     | European | 0.010  | 0.001 | 1.50E-12 | 336782 | 228530  | 1         | risk diff | 1.84E-09 |
| rs3749833 | rs2057657 | 5:131809316 G A  | Sum eosinophil basophil counts                                                                | EFO_0004586                                 | 27863252 | European | -0.029 | 0.004 | 4.02E-12 | 173480 | 0       | 2         | IVNT      | 4.48E-09 |
| rs3749833 | rs2057657 | 5:131809316 G A  | Height                                                                                        | EFO_0004339                                 | UKBB     | European | 0.014  | 0.002 | 1.21E-11 | 336474 | 0       | 1         | IVNT      | 1.26E-08 |
| rs3749833 | rs2057657 | 5:131809316 G A  | Eosinophil count                                                                              | EFO_0004586                                 | 27863252 | European | -0.028 | 0.004 | 5.75E-11 | 173480 | 0       | 2         | IVNT      | 5.04E-08 |
| rs3749833 | rs2057657 | 5:131809316 G A  | Myeloid white cell count                                                                      | EFO_0004586                                 | 27863252 | European | -0.028 | 0.004 | 8.60E-11 | 173480 | 0       | 2         | IVNT      | 7.21E-08 |
| rs3749833 | rs2057657 | 5:131809316 G A  | Granulocyte count                                                                             | EFO_0004586                                 | 27863252 | European | -0.027 | 0.004 | 2.86E-10 | 173480 | 0       | 2         | IVNT      | 2.19E-07 |
| rs3749833 | rs2057657 | 5:131809316 G A  | Sum neutrophil eosinophil counts                                                              | EFO_0004586                                 | 27863252 | European | -0.026 | 0.004 | 7.27E-10 | 173480 | 0       | 2         | IVNT      | 5.10E-07 |
| rs3749833 | rs2057657 | 5:131809316 G A  | Inflammatory bowel disease                                                                    | EFO_0003767                                 | 26192919 | European | 0.128  | 0.021 | 1.25E-09 | 34652  | 12882   | 15        | log OR    | 7.97E-07 |
| rs3749833 | rs2057657 | 5:131809316 G A  | Lymphocyte percentage of white cells                                                          | EFO_0004586                                 | 27863252 | European | 0.026  | 0.004 | 1.32E-09 | 173480 | 0       | 2         | IVNT      | 8.30E-07 |
| rs3749833 | rs2057657 | 5:131809316 G A  | Sum basophil neutrophil counts                                                                | EFO_0004586                                 | 27863252 | European | -0.025 | 0.004 | 6.44E-09 | 173480 | 0       | 2         | IVNT      | 3.37E-06 |
| rs3749833 | rs2057657 | 5:131809316 G A  | Neutrophil count                                                                              | EFO_0004586                                 | 27863252 | European | -0.024 | 0.004 | 1.76E-08 | 173480 | 0       | 2         | IVNT      | 8.54E-06 |
| rs3749833 | rs2057657 | 5:131809316 G A  | White blood cell count                                                                        | EFO_0004586                                 | 27863252 | European | -0.022 | 0.004 | 3.53E-07 | 173480 | 0       | 2         | IVNT      | 1.31E-04 |
| rs3749833 | rs2057657 | 5:131809316 G A  | Eosinophil percentage of white cells                                                          | EFO_0004586                                 | 27863252 | European | -0.021 | 0.004 | 4.62E-07 | 173480 | 0       | 2         | IVNT      | 1.67E-04 |
| rs3749833 | rs2057657 | 5:131809316 G A  | Asthma                                                                                        | EFO_0000270                                 | 29273806 | European | -0.076 | 0.015 | 5.34E-07 | 127669 | 19954   | 56        | log OR    | 1.90E-04 |
| rs3749833 | rs2057657 | 5:131809316 G A  | Comparative height size at age 10                                                             | -                                           | UKBB     | European | 0.010  | 0.002 | 8.71E-07 | 332021 | 0       | 1         | -         | 2.92E-04 |
| rs3749833 | rs2057657 | 5:131809316 G A  | Asthma                                                                                        | EFO_0000270                                 | 29273806 | Mixed    | -0.072 | 0.015 | 1.18E-06 | 142486 | 23948   | 66        | log OR    | 3.80E-04 |
| rs3749833 | rs2057657 | 5:131809316 G A  | Allergic disease                                                                              | EFO_0003785                                 | 29083406 | European | -0.032 | 0.007 | 2.10E-06 | 360838 | 180129  | 13        | log OR    | 6.44E-04 |
| rs3749833 | rs2057657 | 5:131809316_G_A  | Hayfever, allergic rhinitis or eczema                                                         | EFO_0003956;<br>EFO_0005854;<br>EFO_0000274 | UKBB     | European | -0.006 | 0.001 | 3.02E-06 | 336782 | 77891   | 1         | risk diff | 8.93E-04 |
| rs3749833 | rs2057657 | 5:131809316_G_A  | Platelet count                                                                                | EFO_0004586                                 | 27863252 | European | -0.019 | 0.004 | 8.95E-06 | 173480 | 0       | 2         | IVNT      | 2.36E-03 |
| rs3749833 | rs2057657 | 5:131809316_G_A  | Treatment with vitamin a+d capsule                                                            | EFO_0007056                                 | UKBB     | European | 0.000  | 0.000 | 1.06E-05 | 337159 | 53      | 1         | risk diff | 2.70E-03 |

| sentinel  | SNP       | chr_bp_eff_other | trait                                                                                         | efo                         | pmid     | ancestry | beta   | se    | p         | n      | n_cases | n_studies | unit      | FDR       |
|-----------|-----------|------------------|-----------------------------------------------------------------------------------------------|-----------------------------|----------|----------|--------|-------|-----------|--------|---------|-----------|-----------|-----------|
| rs3749833 | rs2057657 | 5:131809316 G A  | Height                                                                                        | EFO_0004339                 | 25282103 | European | 0.015  | 0.004 | 1.30E-05  | 253280 | 0       | 79        | Z-score   | 3.23E-03  |
| rs3749833 | rs2057657 | 5:131809316 G A  | Neutrophil percentage of white cells                                                          | EFO_0004586                 | 27863252 | European | -0.018 | 0.004 | 2.70E-05  | 173480 | 0       | 2         | IVNT      | 6.18E-03  |
| rs3749833 | rs2057657 | 5:131809316 G A  | Leg fat-free mass left                                                                        | -                           | UKBB     | European | 0.008  | 0.002 | 2.84E-05  | 331258 | 0       | 1         | IVNT      | 6.43E-03  |
| rs3749833 | rs2057657 | 5:131809316 G A  | Self-reported nasal polyps                                                                    | EFO_1000391                 | UKBB     | European | -0.001 | 0.000 | 3.03E-05  | 337159 | 1489    | 1         | risk diff | 6.77E-03  |
| rs3749833 | rs2057657 | 5:131809316 G A  | Monocyte count                                                                                | EFO_0004586                 | 27863252 | European | -0.018 | 0.004 | 3.08E-05  | 173480 | 0       | 2         | IVNT      | 6.86E-03  |
| rs3749833 | rs2057657 | 5:131809316 G A  | Leg predicted mass left                                                                       | -                           | UKBB     | European | 0.008  | 0.002 | 3.09E-05  | 331253 | 0       | 1         | IVNT      | 6.88E-03  |
| rs3749833 | rs2057657 | 5:131809316 G A  | Leg fat-free mass right                                                                       | -                           | UKBB     | European | 0.008  | 0.002 | 3.52E-05  | 331285 | 0       | 1         | IVNT      | 7.69E-03  |
| rs3749833 | rs2057657 | 5:131809316 G A  | Leg predicted mass right                                                                      | -                           | UKBB     | European | 0.008  | 0.002 | 3.98E-05  | 331285 | 0       | 1         | IVNT      | 8.55E-03  |
| rs3749833 | rs2057657 | 5:131809316 G A  | Doctor diagnosed asthma                                                                       | EFO_0000270                 | UKBB     | European | -0.008 | 0.002 | 4.30E-05  | 83529  | 10589   | 1         | risk diff | 9.19E-03  |
| rs9273410 | rs9273410 | 6:32627250 A C   | Self-reported malabsorption or coeliac disease                                                | EFO_0001060                 | UKBB     | European | 0.006  | 0.000 | 5.60E-291 | 337159 | 1452    | 1         | risk diff | 1.44E-285 |
| rs9273410 | rs9273410 | 6:32627250 A C   | Intestinal malabsorption                                                                      | EFO_0009554                 | UKBB     | European | 0.002  | 0.000 | 4.22E-102 | 337199 | 624     | 1         | risk diff | 5.43E-97  |
| rs9273410 | rs9273410 | 6:32627250_A_C   | Started insulin within one year diagnosis of diabetes                                         | EFO_0000400                 | UKBB     | European | 0.079  | 0.004 | 1.59E-93  | 15397  | 1872    | 1         | risk diff | 1.36E-88  |
| rs9273410 | rs9273410 | 6:32627250 A C   | Treatment with insulin product                                                                | EFO_0007056                 | UKBB     | European | 0.005  | 0.000 | 6.70E-83  | 337159 | 3319    | 1         | risk diff | 4.31E-78  |
| rs9273410 | rs9273410 | 6:32627250 A C   | Asthma                                                                                        | EFO_0000270                 | UKBB     | European | 0.013  | 0.001 | 5.61E-58  | 336782 | 38791   | 1         | risk diff | 2.89E-53  |
| rs9273410 | rs9273410 | 6:32627250 A C   | Self-reported asthma                                                                          | EFO_0000270                 | UKBB     | European | 0.013  | 0.001 | 4.28E-57  | 337159 | 39049   | 1         | risk diff | 1.84E-52  |
| rs9273410 | rs9273410 | 6:32627250 A C   | Treatment with insulin                                                                        | EFO_0007056                 | UKBB     | European | 0.004  | 0.000 | 1.15E-46  | 180203 | 1377    | 1         | risk diff | 4.23E-42  |
| rs9273410 | rs9273410 | 6:32627250_A_C   | Medication for cholesterol, blood pressure or diabetes: insulin                               | EFO_0007056                 | UKBB     | European | 0.006  | 0.000 | 1.12E-39  | 154702 | 2116    | 1         | risk diff | 3.19E-35  |
| rs9273410 | rs9273410 | 6:32627250_A_C   | Self-reported hypothyroidism or myxedema                                                      | EFO_0004705;<br>EFO_1001055 | UKBB     | European | 0.006  | 0.001 | 3.98E-29  | 337159 | 16376   | 1         | risk diff | 7.88E-25  |
| rs9273410 | rs9273410 | 6:32627250 A C   | Insulin-dependent diabetes mellitus                                                           | EFO_0001359                 | UKBB     | European | 0.001  | 0.000 | 5.33E-28  | 337199 | 431     | 1         | risk diff | 9.80E-24  |
| rs9273410 | rs9273410 | 6:32627250 A C   | Self-reported type 1 diabetes                                                                 | EFO_0001359                 | UKBB     | European | 0.001  | 0.000 | 7.65E-28  | 337159 | 286     | 1         | risk diff | 1.31E-23  |
| rs9273410 | rs9273410 | 6:32627250 A C   | Treatment with ventolin 100micrograms inhaler                                                 | EFO_0007056                 | UKBB     | European | 0.005  | 0.000 | 6.13E-27  | 337159 | 9712    | 1         | risk diff | 9.85E-23  |
| rs9273410 | rs9273410 | 6:32627250_A_C   | Self-reported hyperthyroidism or thyrotoxicosis                                               | EFO_0004705;<br>EFO_0004283 | UKBB     | European | 0.002  | 0.000 | 2.56E-26  | 337159 | 2547    | 1         | risk diff | 3.88E-22  |
| rs9273410 | rs9273410 | 6:32627250 A C   | Treatment with levothyroxine sodium                                                           | EFO_0007056                 | UKBB     | European | 0.005  | 0.001 | 9.80E-23  | 337159 | 13717   | 1         | risk diff | 8.69E-19  |
| rs9273410 | rs9273410 | 6:32627250 A C   | Diabetes diagnosed by doctor                                                                  | EFO_0000400                 | UKBB     | European | 0.005  | 0.001 | 6.15E-22  | 336473 | 16183   | 1         | risk diff | 4.94E-18  |
| rs9273410 | rs9273410 | 6:32627250_A_C   | No blood clot, bronchitis, emphysema, asthma, rhinitis, eczema or allergy diagnosed by doctor | -                           | UKBB     | European | -0.010 | 0.001 | 5.69E-18  | 336782 | 228530  | 1         | risk diff | 2.25E-14  |
| rs9273410 | rs9273410 | 6:32627250 A C   | Doctor diagnosed asthma                                                                       | EFO_0000270                 | UKBB     | European | 0.015  | 0.002 | 2.07E-17  | 83529  | 10589   | 1         | risk diff | 7.49E-14  |
| rs9273410 | rs9273410 | 6:32627250_A_C   | Forced expiratory volume in 1-second, best measure                                            | EFO_0004314                 | UKBB     | European | -0.020 | 0.002 | 3.42E-17  | 255492 | 0       | 1         | IVNT      | 1.17E-13  |
| rs9273410 | rs9273410 | 6:32627250 A C   | Long-standing illness, disability or infirmity                                                | -                           | UKBB     | European | 0.010  | 0.001 | 1.31E-16  | 329663 | 107123  | 1         | risk diff | 4.11E-13  |
| rs9273410 | rs9273410 | 6:32627250_A_C   | Forced expiratory volume in 1-second, predicted percentage                                    | EFO_0004314                 | UKBB     | European | -0.037 | 0.005 | 1.59E-16  | 110423 | 0       | 1         | IVNT      | 4.93E-13  |
| rs9273410 | rs9273410 | 6:32627250 A C   | Forced expiratory volume in 1-second                                                          | EFO_0004314                 | UKBB     | European | -0.018 | 0.002 | 2.91E-16  | 307638 | 0       | 1         | IVNT      | 8.93E-13  |
| rs9273410 | rs9273410 | 6:32627250 A C   | Self-reported diabetes                                                                        | EFO_0000400                 | UKBB     | European | 0.004  | 0.001 | 2.83E-15  | 337159 | 13243   | 1         | risk diff | 7.93E-12  |
| rs9273410 | rs9273410 | 6:32627250_A_C   | Eye problems or disorders: diabetes related eye disease                                       | EFO_0009486                 | UKBB     | European | 0.005  | 0.001 | 3.43E-15  | 108817 | 2072    | 1         | risk diff | 9.19E-12  |
| rs9273410 | rs9273410 | 6:32627250 A C   | Self-reported psoriasis                                                                       | EFO_0000676                 | UKBB     | European | -0.002 | 0.000 | 5.16E-12  | 337159 | 3871    | 1         | risk diff | 5.65E-09  |
| rs9273410 | rs9273410 | 6:32627250 A C   | Illnesses of siblings: diabetes                                                               | EFO_0000400                 | UKBB     | European | 0.005  | 0.001 | 1.50E-11  | 261075 | 21747   | 1         | risk diff | 1.51E-08  |
| rs9273410 | rs9273410 | 6:32627250 A C   | Taking other prescription medications                                                         | EFO_0007056                 | UKBB     | European | 0.009  | 0.001 | 3.30E-11  | 336330 | 158113  | 1         | risk diff | 3.07E-08  |
| rs9273410 | rs9273410 | 6:32627250 A C   | Other disorders of pancreatic internal secretion                                              | EFO_0009605                 | UKBB     | European | 0.000  | 0.000 | 5.93E-10  | 337199 | 228     | 1         | risk diff | 4.26E-07  |
| rs9273410 | rs9273410 | 6:32627250 A C   | Treatment with thyroxine product                                                              | EFO_0007056                 | UKBB     | European | 0.002  | 0.000 | 8.77E-10  | 337159 | 3917    | 1         | risk diff | 5.99E-07  |
| rs9273410 | rs9273410 | 6:32627250 A C   | Number of self-reported non-cancer illnesses                                                  | EFO_0009801                 | UKBB     | European | 0.013  | 0.002 | 1.25E-09  | 337159 | 0       | 1         | -         | 7.97E-07  |
| rs9273410 | rs9273410 | 6:32627250 A C   | Self-reported ulcerative colitis                                                              | EFO_0000729                 | UKBB     | European | -0.001 | 0.000 | 1.70E-09  | 337159 | 1795    | 1         | risk diff | 1.01E-06  |
| rs9273410 | rs9273410 | 6:32627250 A C   | Wheeze or whistling in the chest in last year                                                 | EFO_0009715                 | UKBB     | European | 0.006  | 0.001 | 4.69E-09  | 331257 | 68531   | 1         | risk diff | 2.52E-06  |
| rs9273410 | rs9273410 | 6:32627250_A_C   | Red blood cell count                                                                          | EFO_0004586                 | 27863252 | European | -0.021 | 0.004 | 7.62E-09  | 173480 | 0       | 2         | IVNT      | 3.93E-06  |

| sentinel  | SNP       | chr_bp_eff_other | trait                                                                                         | efo                                         | pmid     | ancestry | beta   | se    | p        | n      | n_cases | n_studies | unit      | FDR      |
|-----------|-----------|------------------|-----------------------------------------------------------------------------------------------|---------------------------------------------|----------|----------|--------|-------|----------|--------|---------|-----------|-----------|----------|
| rs9273410 | rs9273410 | 6:32627250_A_C   | Treatment with seretide 50 evohaler                                                           | EFO_0007056                                 | UKBB     | European | 0.002  | 0.000 | 1.09E-08 | 337159 | 3961    | 1         | risk diff | 5.49E-06 |
| rs9273410 | rs9273410 | 6:32627250_A_C   | Peak expiratory flow                                                                          | EFO_0009718                                 | UKBB     | European | -0.013 | 0.002 | 4.36E-08 | 307638 | 0       | 1         | IVNT      | 1.96E-05 |
| rs9273410 | rs9273410 | 6:32627250_A_C   | Hemoglobin concentration                                                                      | EFO_0004586                                 | 27863252 | European | -0.019 | 0.004 | 8.28E-08 | 173480 | 0       | 2         | IVNT      | 3.45E-05 |
| rs9273410 | rs9273410 | 6:32627250_A_C   | Self-reported multiple sclerosis                                                              | EFO_0003885                                 | UKBB     | European | -0.001 | 0.000 | 1.63E-07 | 337159 | 1228    | 1         | risk diff | 6.40E-05 |
| rs9273410 | rs9273410 | 6:32627250_A_C   | Reticulocyte count                                                                            | EFO_0004586                                 | 27863252 | European | -0.019 | 0.004 | 2.47E-07 | 173480 | 0       | 2         | IVNT      | 9.41E-05 |
| rs9273410 | rs9273410 | 6:32627250_A_C   | Treatment with fludrocortisone                                                                | EFO_0007056                                 | UKBB     | European | 0.000  | 0.000 | 2.84E-07 | 337159 | 148     | 1         | risk diff | 1.07E-04 |
| rs9273410 | rs9273410 | 6:32627250_A_C   | Ulcerative colitis                                                                            | EFO_0000729                                 | UKBB     | European | -0.001 | 0.000 | 6.88E-07 | 337199 | 1579    | 1         | risk diff | 2.36E-04 |
| rs9273410 | rs9273410 | 6:32627250_A_C   | Asthma                                                                                        | EFO_0000270                                 | UKBB     | European | 0.001  | 0.000 | 8.36E-07 | 337199 | 1235    | 1         | risk diff | 2.83E-04 |
| rs9273410 | rs9273410 | 6:32627250_A_C   | Treatment with carbimazole                                                                    | EFO_0007056                                 | UKBB     | European | 0.000  | 0.000 | 1.01E-06 | 337159 | 275     | 1         | risk diff | 3.30E-04 |
| rs9273410 | rs9273410 | 6:32627250_A_C   | Self-reported adrenocortical insufficiency or addisons disease                                | EFO_0009491                                 | UKBB     | European | 0.000  | 0.000 | 1.02E-06 | 337159 | 141     | 1         | risk diff | 3.32E-04 |
| rs9273410 | rs9273410 | 6:32627250_A_C   | Mean platelet volume                                                                          | EFO_0004586                                 | 27863252 | European | 0.018  | 0.004 | 1.36E-06 | 173480 | 0       | 2         | IVNT      | 4.31E-04 |
| rs9273410 | rs9273410 | 6:32627250_A_C   | Lymphocyte count                                                                              | EFO_0004586                                 | 27863252 | European | -0.017 | 0.004 | 2.30E-06 | 173480 | 0       | 2         | IVNT      | 7.01E-04 |
| rs9273410 | rs9273410 | 6:32627250_A_C   | Hayfever, allergic rhinitis or eczema                                                         | EFO_0003956;<br>EFO_0005854;<br>EFO_0000274 | UKBB     | European | 0.005  | 0.001 | 2.53E-06 | 336782 | 77891   | 1         | risk diff | 7.62E-04 |
| rs9273410 | rs9273410 | 6:32627250_A_C   | Neutrophil percentage of white cells                                                          | EFO_0004586                                 | 27863252 | European | 0.017  | 0.004 | 2.92E-06 | 173480 | 0       | 2         | IVNT      | 8.67E-04 |
| rs9273410 | rs9273410 | 6:32627250_A_C   | Unspecified diabetes mellitus                                                                 | EFO_0000400                                 | UKBB     | European | 0.000  | 0.000 | 3.10E-06 | 337199 | 208     | 1         | risk diff | 9.13E-04 |
| rs9273410 | rs9273410 | 6:32627250_A_C   | Treatment with ferrous sulphate                                                               | EFO_0007056                                 | UKBB     | European | 0.001  | 0.000 | 4.53E-06 | 337159 | 1630    | 1         | risk diff | 1.28E-03 |
| rs9273410 | rs9273410 | 6:32627250_A_C   | Mineral and other dietary supplements: calcium                                                | EFO_0008111                                 | UKBB     | European | 0.003  | 0.001 | 5.29E-06 | 336314 | 22047   | 1         | risk diff | 1.47E-03 |
| rs9273410 | rs9273410 | 6:32627250_A_C   | Number of treatments or medications taken                                                     | EFO_0007056                                 | UKBB     | European | 0.009  | 0.002 | 5.59E-06 | 337159 | 0       | 1         | -         | 1.55E-03 |
| rs9273410 | rs9273410 | 6:32627250_A_C   | Other anaemias                                                                                | -                                           | UKBB     | European | 0.001  | 0.000 | 7.20E-06 | 337199 | 2367    | 1         | risk diff | 1.95E-03 |
| rs9273410 | rs9273410 | 6:32627250_A_C   | Lymphocyte percentage of white cells                                                          | EFO_0004586                                 | 27863252 | European | -0.016 | 0.004 | 7.84E-06 | 173480 | 0       | 2         | IVNT      | 2.09E-03 |
| rs9273410 | rs9273410 | 6:32627250_A_C   | Granulocyte percentage of myeloid white cells                                                 | EFO_0004586                                 | 27863252 | European | 0.016  | 0.004 | 1.28E-05 | 173480 | 0       | 2         | IVNT      | 3.20E-03 |
| rs9273410 | rs9273410 | 6:32627250_A_C   | Mean corpuscular volume                                                                       | EFO_0004586                                 | 27863252 | European | 0.015  | 0.004 | 1.80E-05 | 173480 | 0       | 2         | IVNT      | 4.32E-03 |
| rs9273410 | rs9273410 | 6:32627250_A_C   | Nasal polyp                                                                                   | EFO_1000391                                 | UKBB     | European | 0.001  | 0.000 | 2.00E-05 | 337199 | 1637    | 1         | risk diff | 4.74E-03 |
| rs9273410 | rs9273410 | 6:32627250_A_C   | Mean corpuscular hemoglobin concentration                                                     | EFO_0004586                                 | 27863252 | European | -0.015 | 0.003 | 2.51E-05 | 173480 | 0       | 2         | IVNT      | 5.77E-03 |
| rs9273410 | rs9273410 | 6:32627250_A_C   | Self-reported diabetic eye disease                                                            | EFO_0009486                                 | UKBB     | European | 0.000  | 0.000 | 2.99E-05 | 337159 | 635     | 1         | risk diff | 6.70E-03 |
| rs9273410 | rs9273410 | 6:32627250_A_C   | Treatment with salbutamol                                                                     | EFO_0007056                                 | UKBB     | European | 0.001  | 0.000 | 3.10E-05 | 337159 | 3972    | 1         | risk diff | 6.88E-03 |
| rs9273410 | rs9273410 | 6:32627250_A_C   | Used an inhaler for chest within last hour                                                    | -                                           | UKBB     | European | 0.001  | 0.000 | 3.48E-05 | 309688 | 2245    | 1         | risk diff | 7.62E-03 |
| rs9273410 | rs9273410 | 6:32627250_A_C   | Iron deficiency anaemia                                                                       | -                                           | UKBB     | European | 0.001  | 0.000 | 3.68E-05 | 337199 | 1775    | 1         | risk diff | 7.98E-03 |
| rs9273410 | rs9273410 | 6:32627250_A_C   | Thyrotoxicosis                                                                                | EFO_0009190                                 | UKBB     | European | 0.000  | 0.000 | 3.75E-05 | 337199 | 299     | 1         | risk diff | 8.11E-03 |
| rs2584662 | rs2671654 | 17:47468011_G_A  | Eosinophil count                                                                              | EFO_0004586                                 | 27863252 | European | 0.027  | 0.004 | 6.49E-14 | 173480 | 0       | 2         | IVNT      | 1.23E-10 |
| rs2584662 | rs2671654 | 17:47468011_G_A  | Asthma                                                                                        | EFO_0000270                                 | UKBB     | European | 0.006  | 0.001 | 8.65E-14 | 336782 | 38791   | 1         | risk diff | 1.57E-10 |
| rs2584662 | rs2671654 | 17:47468011_G_A  | Vascular or heart problems diagnosed by doctor: none of the above                             | -                                           | UKBB     | European | -0.008 | 0.001 | 2.89E-13 | 336683 | 236530  | 1         | risk diff | 4.68E-10 |
| rs2584662 | rs2671654 | 17:47468011_G_A  | Sum eosinophil basophil counts                                                                | EFO_0004586                                 | 27863252 | European | 0.026  | 0.004 | 4.62E-13 | 173480 | 0       | 2         | IVNT      | 6.87E-10 |
| rs2584662 | rs2671654 | 17:47468011_G_A  | Impedance of whole body                                                                       | -                                           | UKBB     | European | -0.013 | 0.002 | 1.11E-12 | 331284 | 0       | 1         | IVNT      | 1.48E-09 |
| rs2584662 | rs2671654 | 17:47468011_G_A  | No blood clot, bronchitis, emphysema, asthma, rhinitis, eczema or allergy diagnosed by doctor | -                                           | UKBB     | European | -0.008 | 0.001 | 1.28E-12 | 336782 | 228530  | 1         | risk diff | 1.63E-09 |
| rs2584662 | rs2671654 | 17:47468011_G_A  | Self-reported asthma                                                                          | EFO_0000270                                 | UKBB     | European | 0.006  | 0.001 | 1.83E-12 | 337159 | 39049   | 1         | risk diff | 2.20E-09 |
| rs2584662 | rs2671654 | 17:47468011_G_A  | Impedance of leg right                                                                        | -                                           | UKBB     | European | -0.015 | 0.002 | 7.57E-12 | 331301 | 0       | 1         | IVNT      | 8.18E-09 |
| rs2584662 | rs2671654 | 17:47468011_G_A  | Impedance of leg left                                                                         | -                                           | UKBB     | European | -0.015 | 0.002 | 8.38E-12 | 331296 | 0       | 1         | IVNT      | 8.99E-09 |
| rs2584662 | rs2671654 | 17:47468011_G_A  | Eosinophil percentage of white cells                                                          | EFO_0004586                                 | 27863252 | European | 0.024  | 0.004 | 2.63E-11 | 173480 | 0       | 2         | IVNT      | 2.53E-08 |
| rs2584662 | rs2671654 | 17:47468011_G_A  | Vascular or heart problems diagnosed by doctor: high blood pressure                           | EFO_0004325                                 | UKBB     | European | 0.007  | 0.001 | 1.27E-10 | 336683 | 91033   | 1         | risk diff | 1.02E-07 |
| rs2584662 | rs2671654 | 17:47468011_G_A  | Eosinophil percentage of granulocytes                                                         | EFO_0004586                                 | 27863252 | European | 0.023  | 0.004 | 5.01E-10 | 173480 | 0       | 2         | IVNT      | 3.65E-07 |
| rs2584662 | rs2671654 | 17:47468011_G_A  | Wheeze or whistling in the chest in last year                                                 | EFO_0009715                                 | UKBB     | European | 0.006  | 0.001 | 1.06E-09 | 331257 | 68531   | 1         | risk diff | 6.92E-07 |
| rs2584662 | rs2671654 | 17:47468011_G_A  | Impedance of arm left                                                                         | -                                           | UKBB     | European | -0.011 | 0.002 | 1.60E-09 | 331292 | 0       | 1         | IVNT      | 9.67E-07 |



| sentinel  | SNP       | chr_bp_eff_other | trait                                                                                         | efo                                         | pmid     | ancestry | beta   | se    | p        | n      | n_cases | n_studies | unit      | FDR      |
|-----------|-----------|------------------|-----------------------------------------------------------------------------------------------|---------------------------------------------|----------|----------|--------|-------|----------|--------|---------|-----------|-----------|----------|
| rs2584662 | rs2671654 | 17:47468011_G_A  | Self-reported hypertension                                                                    | EFO_0000537                                 | UKBB     | European | 0.006  | 0.001 | 3.30E-09 | 337159 | 87690   | 1         | risk diff | 1.90E-06 |
| rs2584662 | rs2671654 | 17:47468011_G_A  | Neutrophil percentage of granulocytes                                                         | EFO_0004586                                 | 27863252 | European | -0.021 | 0.004 | 4.82E-09 | 173480 | 0       | 2         | IVNT      | 2.58E-06 |
| rs2584662 | rs2671654 | 17:47468011_G_A  | Height                                                                                        | EFO_0004339                                 | UKBB     | European | -0.010 | 0.002 | 1.28E-08 | 336474 | 0       | 1         | IVNT      | 6.37E-06 |
| rs2584662 | rs2671654 | 17:47468011_G_A  | Medication for cholesterol, blood pressure or diabetes: blood pressure medication             | EFO_0007056                                 | UKBB     | European | 0.009  | 0.002 | 1.28E-08 | 154702 | 38548   | 1         | risk diff | 6.40E-06 |
| rs2584662 | rs2671654 | 17:47468011_G_A  | Impedance of arm right                                                                        | -                                           | UKBB     | European | -0.009 | 0.002 | 4.50E-08 | 331279 | 0       | 1         | IVNT      | 2.02E-05 |
| rs2584662 | rs2671654 | 17:47468011_G_A  | Taking other prescription medications                                                         | EFO_0007056                                 | UKBB     | European | 0.007  | 0.001 | 4.94E-08 | 336330 | 158113  | 1         | risk diff | 2.20E-05 |
| rs2584662 | rs2671654 | 17:47468011_G_A  | Number of treatments or medications taken                                                     | EFO_0007056                                 | UKBB     | European | 0.011  | 0.002 | 6.24E-08 | 337159 | 0       | 1         | -         | 2.71E-05 |
| rs2584662 | rs2671654 | 17:47468011_G_A  | Hayfever, allergic rhinitis or eczema                                                         | EFO_0003956;<br>EFO_0005854;<br>EFO_0000274 | UKBB     | European | 0.006  | 0.001 | 8.76E-08 | 336782 | 77891   | 1         | risk diff | 3.62E-05 |
| rs2584662 | rs2671654 | 17:47468011_G_A  | Number of self-reported non-cancer illnesses                                                  | EFO_0009801                                 | UKBB     | European | 0.011  | 0.002 | 2.00E-07 | 337159 | 0       | 1         | -         | 7.74E-05 |
| rs2584662 | rs2671654 | 17:47468011_G_A  | Comparative body size at age 10                                                               | -                                           | UKBB     | European | 0.009  | 0.002 | 4.67E-07 | 331693 | 0       | 1         | -         | 1.68E-04 |
| rs2584662 | rs2671654 | 17:47468011_G_A  | Treatment with ventolin 100micrograms inhaler                                                 | EFO_0007056                                 | UKBB     | European | 0.002  | 0.000 | 7.29E-07 | 337159 | 9712    | 1         | risk diff | 2.49E-04 |
| rs2584662 | rs2671654 | 17:47468011_G_A  | Coronary artery disease                                                                       | EFO_0000378;<br>EFO_0001645                 | 29212778 | Mixed    | 0.028  | 0.006 | 1.11E-06 | 547261 | 122733  | 2         | log OR    | 3.57E-04 |
| rs2584662 | rs2671654 | 17:47468011_G_A  | Atopic dermatitis                                                                             | EFO_0000274                                 | 26482879 | Mixed    | 0.084  | 0.018 | 3.39E-06 | 103066 | 18900   | 22        | log OR    | 9.87E-04 |
| rs2584662 | rs2671654 | 17:47468011_G_A  | Medication for cholesterol, blood pressure or diabetes: none of the above                     | EFO_0007056                                 | UKBB     | European | -0.008 | 0.002 | 3.77E-06 | 154702 | 103004  | 1         | risk diff | 1.09E-03 |
| rs2584662 | rs2671654 | 17:47468011_G_A  | Coronary artery disease                                                                       | EFO_0000378;<br>EFO_0001645                 | 29212778 | Mixed    | 0.033  | 0.007 | 3.80E-06 | 296525 | 34541   | 1         | log OR    | 1.09E-03 |
| rs2584662 | rs2671654 | 17:47468011_G_A  | Allergic disease                                                                              | EFO_0003785                                 | 29083406 | European | 0.026  | 0.006 | 7.13E-06 | 360838 | 180129  | 13        | log OR    | 1.94E-03 |
| rs2584662 | rs2671654 | 17:47468011_G_A  | Doctor diagnosed asthma                                                                       | EFO_0000270                                 | UKBB     | European | 0.007  | 0.002 | 2.75E-05 | 83529  | 10589   | 1         | risk diff | 6.26E-03 |
| rs2584662 | rs2671654 | 17:47468011_G_A  | Overall health rating                                                                         | -                                           | UKBB     | European | 0.007  | 0.002 | 2.89E-05 | 336020 | 0       | 1         | -         | 6.52E-03 |
| rs2584662 | rs2671654 | 17:47468011_G_A  | Long-standing illness, disability or infirmity                                                | -                                           | UKBB     | European | 0.005  | 0.001 | 4.65E-05 | 329663 | 107123  | 1         | risk diff | 9.83E-03 |
| rs2584662 | rs2584663 | 17:47468147_A_G  | Asthma                                                                                        | EFO_0000270                                 | UKBB     | European | 0.006  | 0.001 | 1.02E-12 | 336782 | 38791   | 1         | risk diff | 1.38E-09 |
| rs2584662 | rs2584663 | 17:47468147_A_G  | Self-reported asthma                                                                          | EFO_0000270                                 | UKBB     | European | 0.006  | 0.001 | 6.41E-12 | 337159 | 39049   | 1         | risk diff | 6.99E-09 |
| rs2584662 | rs2584663 | 17:47468147_A_G  | Eosinophil count                                                                              | EFO_0004586                                 | 27863252 | European | 0.025  | 0.004 | 1.06E-11 | 173480 | 0       | 2         | IVNT      | 1.10E-08 |
| rs2584662 | rs2584663 | 17:47468147_A_G  | Sum eosinophil basophil counts                                                                | EFO_0004586                                 | 27863252 | European | 0.025  | 0.004 | 1.91E-11 | 173480 | 0       | 2         | IVNT      | 1.88E-08 |
| rs2584662 | rs2584663 | 17:47468147_A_G  | Eosinophil percentage of white cells                                                          | EFO_0004586                                 | 27863252 | European | 0.024  | 0.004 | 7.75E-11 | 173480 | 0       | 2         | IVNT      | 6.56E-08 |
| rs2584662 | rs2584663 | 17:47468147_A_G  | No blood clot, bronchitis, emphysema, asthma, rhinitis, eczema or allergy diagnosed by doctor | -                                           | UKBB     | European | -0.008 | 0.001 | 1.97E-10 | 336782 | 228530  | 1         | risk diff | 1.53E-07 |
| rs2584662 | rs2584663 | 17:47468147_A_G  | Eosinophil percentage of granulocytes                                                         | EFO_0004586                                 | 27863252 | European | 0.023  | 0.004 | 6.80E-10 | 173480 | 0       | 2         | IVNT      | 4.82E-07 |
| rs2584662 | rs2584663 | 17:47468147_A_G  | Neutrophil percentage of granulocytes                                                         | EFO_0004586                                 | 27863252 | European | -0.023 | 0.004 | 9.48E-10 | 173480 | 0       | 2         | IVNT      | 6.36E-07 |
| rs2584662 | rs2584663 | 17:47468147_A_G  | Asthma                                                                                        | EFO_0000270                                 | 29273806 | European | 0.082  | 0.014 | 3.72E-09 | 127669 | 19954   | 56        | log OR    | 2.06E-06 |
| rs2584662 | rs2584663 | 17:47468147_A_G  | Vascular or heart problems diagnosed by doctor: none of the above                             | -                                           | UKBB     | European | -0.007 | 0.001 | 2.02E-08 | 336683 | 236530  | 1         | risk diff | 9.73E-06 |
| rs2584662 | rs2584663 | 17:47468147_A_G  | Wheeze or whistling in the chest in last year                                                 | EFO_0009715                                 | UKBB     | European | 0.006  | 0.001 | 7.39E-08 | 331257 | 68531   | 1         | risk diff | 3.14E-05 |
| rs2584662 | rs2584663 | 17:47468147_A_G  | Asthma                                                                                        | EFO_0000270                                 | 29273806 | Mixed    | 0.071  | 0.013 | 1.06E-07 | 142486 | 23948   | 66        | log OR    | 4.32E-05 |
| rs2584662 | rs2584663 | 17:47468147_A_G  | Hayfever, allergic rhinitis or eczema                                                         | EFO_0003956;<br>EFO_0005854;<br>EFO_0000274 | UKBB     | European | 0.005  | 0.001 | 4.05E-07 | 336782 | 77891   | 1         | risk diff | 1.48E-04 |
| rs2584662 | rs2584663 | 17:47468147_A_G  | Atopic dermatitis                                                                             | EFO_0000274                                 | 26482879 | Mixed    | 0.095  | 0.019 | 4.28E-07 | 103066 | 18900   | 22        | log OR    | 1.55E-04 |
| rs2584662 | rs2584663 | 17:47468147_A_G  | Number of treatments or medications taken                                                     | EFO_0007056                                 | UKBB     | European | 0.010  | 0.002 | 4.98E-07 | 337159 | 0       | 1         | -         | 1.79E-04 |
| rs2584662 | rs2584663 | 17:47468147_A_G  | Comparative body size at age 10                                                               | -                                           | UKBB     | European | 0.009  | 0.002 | 6.08E-07 | 331693 | 0       | 1         | -         | 2.13E-04 |
| rs2584662 | rs2584663 | 17:47468147_A_G  | Coronary artery disease                                                                       | EFO_0000378;<br>EFO_0001645                 | 29212778 | Mixed    | 0.029  | 0.006 | 1.30E-06 | 547261 | 122733  | 2         | log OR    | 4.15E-04 |
| rs2584662 | rs2584663 | 17:47468147_A_G  | Impedance of whole body                                                                       | -                                           | UKBB     | European | -0.009 | 0.002 | 1.66E-06 | 331284 | 0       | 1         | IVNT      | 5.14E-04 |
| rs2584662 | rs2584663 | 17:47468147_A_G  | Taking other prescription medications                                                         | EFO_0007056                                 | UKBB     | European | 0.006  | 0.001 | 2.83E-06 | 336330 | 158113  | 1         | risk diff | 8.44E-04 |

| sentinel  | SNP       | chr_bp_eff_other | trait                                                                                         | efo                                         | pmid     | ancestry | beta   | se    | p        | n      | n_cases | n_studies | unit      | FDR      |
|-----------|-----------|------------------|-----------------------------------------------------------------------------------------------|---------------------------------------------|----------|----------|--------|-------|----------|--------|---------|-----------|-----------|----------|
| rs2584662 | rs2584663 | 17:47468147_A_G  | Impedance of leg left                                                                         | -                                           | UKBB     | European | -0.011 | 0.002 | 3.36E-06 | 331296 | 0       | 1         | IVNT      | 9.80E-04 |
| rs2584662 | rs2584663 | 17:47468147_A_G  | Impedance of leg right                                                                        | -                                           | UKBB     | European | -0.011 | 0.002 | 4.36E-06 | 331301 | 0       | 1         | IVNT      | 1.24E-03 |
| rs2584662 | rs2584663 | 17:47468147_A_G  | Vascular or heart problems diagnosed by doctor: high blood pressure                           | EFO_0004325                                 | UKBB     | European | 0.005  | 0.001 | 4.81E-06 | 336683 | 91033   | 1         | risk diff | 1.36E-03 |
| rs2584662 | rs2584663 | 17:47468147_A_G  | Coronary artery disease                                                                       | EFO_0000378;<br>EFO_0001645                 | 29212778 | Mixed    | 0.033  | 0.007 | 7.70E-06 | 296525 | 34541   | 1         | log OR    | 2.06E-03 |
| rs2584662 | rs2584663 | 17:47468147_A_G  | Number of self-reported non-cancer illnesses                                                  | EFO_0009801                                 | UKBB     | European | 0.009  | 0.002 | 1.24E-05 | 337159 | 0       | 1         | -         | 3.10E-03 |
| rs2584662 | rs2584663 | 17:47468147_A_G  | Medication for cholesterol, blood pressure or diabetes: blood pressure medication             | EFO_0007056                                 | UKBB     | European | 0.007  | 0.002 | 1.53E-05 | 154702 | 38548   | 1         | risk diff | 3.71E-03 |
| rs2584662 | rs2584663 | 17:47468147_A_G  | Self-reported hypertension                                                                    | EFO_0000537                                 | UKBB     | European | 0.005  | 0.001 | 2.34E-05 | 337159 | 87690   | 1         | risk diff | 5.45E-03 |
| rs2584662 | rs2584663 | 17:47468147_A_G  | Allergic disease                                                                              | EFO_0003785                                 | 29083406 | European | 0.025  | 0.006 | 2.75E-05 | 360838 | 180129  | 13        | log OR    | 6.26E-03 |
| rs2584662 | rs2584663 | 17:47468147_A_G  | Mitral annular calcification                                                                  | EFO_0005262                                 | 23388002 | Mixed    | NA     | NA    | 3.10E-05 | 3795   | 568     | 2         | log OR    | 6.88E-03 |
| rs2584662 | rs2584663 | 17:47468147_A_G  | Mitral annular calcium                                                                        | EFO_0005262                                 | 23388002 | Mixed    | NA     | NA    | 3.10E-05 | 6942   | -       | -         | -         | 6.88E-03 |
| rs2584662 | rs2412099 | 17:47469186_A_G  | Asthma                                                                                        | EFO_0000270                                 | UKBB     | European | -0.006 | 0.001 | 8.13E-14 | 336782 | 38791   | 1         | risk diff | 1.51E-10 |
| rs2584662 | rs2412099 | 17:47469186_A_G  | Eosinophil count                                                                              | EFO_0004586                                 | 27863252 | European | -0.027 | 0.004 | 1.53E-13 | 173480 | 0       | 2         | IVNT      | 2.68E-10 |
| rs2584662 | rs2412099 | 17:47469186_A_G  | Vascular or heart problems diagnosed by doctor: none of the above                             | -                                           | UKBB     | European | 0.008  | 0.001 | 3.81E-13 | 336683 | 236530  | 1         | risk diff | 5.87E-10 |
| rs2584662 | rs2412099 | 17:47469186_A_G  | Sum eosinophil basophil counts                                                                | EFO_0004586                                 | 27863252 | European | -0.026 | 0.004 | 1.11E-12 | 173480 | 0       | 2         | IVNT      | 1.48E-09 |
| rs2584662 | rs2412099 | 17:47469186_A_G  | Impedance of whole body                                                                       | -                                           | UKBB     | European | 0.013  | 0.002 | 1.15E-12 | 331284 | 0       | 1         | IVNT      | 1.52E-09 |
| rs2584662 | rs2412099 | 17:47469186_A_G  | No blood clot, bronchitis, emphysema, asthma, rhinitis, eczema or allergy diagnosed by doctor | -                                           | UKBB     | European | 0.008  | 0.001 | 1.20E-12 | 336782 | 228530  | 1         | risk diff | 1.56E-09 |
| rs2584662 | rs2412099 | 17:47469186_A_G  | Self-reported asthma                                                                          | EFO_0000270                                 | UKBB     | European | -0.006 | 0.001 | 1.76E-12 | 337159 | 39049   | 1         | risk diff | 2.12E-09 |
| rs2584662 | rs2412099 | 17:47469186_A_G  | Impedance of leg right                                                                        | -                                           | UKBB     | European | 0.015  | 0.002 | 8.06E-12 | 331301 | 0       | 1         | IVNT      | 8.68E-09 |
| rs2584662 | rs2412099 | 17:47469186_A_G  | Impedance of leg left                                                                         | -                                           | UKBB     | European | 0.015  | 0.002 | 9.06E-12 | 331296 | 0       | 1         | IVNT      | 9.63E-09 |
| rs2584662 | rs2412099 | 17:47469186_A_G  | Eosinophil percentage of white cells                                                          | EFO_0004586                                 | 27863252 | European | -0.024 | 0.004 | 5.66E-11 | 173480 | 0       | 2         | IVNT      | 4.99E-08 |
| rs2584662 | rs2412099 | 17:47469186_A_G  | Vascular or heart problems diagnosed by doctor: high blood pressure                           | EFO_0004325                                 | UKBB     | European | -0.007 | 0.001 | 1.56E-10 | 336683 | 91033   | 1         | risk diff | 1.24E-07 |
| rs2584662 | rs2412099 | 17:47469186_A_G  | Wheeze or whistling in the chest in last year                                                 | EFO_0009715                                 | UKBB     | European | -0.006 | 0.001 | 1.02E-09 | 331257 | 68531   | 1         | risk diff | 6.74E-07 |
| rs2584662 | rs2412099 | 17:47469186_A_G  | Eosinophil percentage of granulocytes                                                         | EFO_0004586                                 | 27863252 | European | -0.022 | 0.004 | 1.12E-09 | 173480 | 0       | 2         | IVNT      | 7.25E-07 |
| rs2584662 | rs2412099 | 17:47469186_A_G  | Impedance of arm left                                                                         | -                                           | UKBB     | European | 0.011  | 0.002 | 1.62E-09 | 331292 | 0       | 1         | IVNT      | 9.73E-07 |
| rs2584662 | rs2412099 | 17:47469186_A_G  | Self-reported hypertension                                                                    | EFO_0000537                                 | UKBB     | European | -0.006 | 0.001 | 4.12E-09 | 337159 | 87690   | 1         | risk diff | 2.25E-06 |
| rs2584662 | rs2412099 | 17:47469186_A_G  | Neutrophil percentage of granulocytes                                                         | EFO_0004586                                 | 27863252 | European | 0.021  | 0.004 | 1.03E-08 | 173480 | 0       | 2         | IVNT      | 5.22E-06 |
| rs2584662 | rs2412099 | 17:47469186_A_G  | Medication for cholesterol, blood pressure or diabetes: blood pressure medication             | EFO_0007056                                 | UKBB     | European | -0.009 | 0.002 | 1.16E-08 | 154702 | 38548   | 1         | risk diff | 5.82E-06 |
| rs2584662 | rs2412099 | 17:47469186_A_G  | Height                                                                                        | EFO_0004339                                 | UKBB     | European | 0.010  | 0.002 | 1.29E-08 | 336474 | 0       | 1         | IVNT      | 6.41E-06 |
| rs2584662 | rs2412099 | 17:47469186_A_G  | Impedance of arm right                                                                        | -                                           | UKBB     | European | 0.009  | 0.002 | 4.30E-08 | 331279 | 0       | 1         | IVNT      | 1.94E-05 |
| rs2584662 | rs2412099 | 17:47469186_A_G  | Taking other prescription medications                                                         | EFO_0007056                                 | UKBB     | European | -0.007 | 0.001 | 5.38E-08 | 336330 | 158113  | 1         | risk diff | 2.37E-05 |
| rs2584662 | rs2412099 | 17:47469186_A_G  | Number of treatments or medications taken                                                     | EFO_0007056                                 | UKBB     | European | -0.011 | 0.002 | 7.32E-08 | 337159 | 0       | 1         | -         | 3.11E-05 |
| rs2584662 | rs2412099 | 17:47469186_A_G  | Hayfever, allergic rhinitis or eczema                                                         | EFO_0003956;<br>EFO_0005854;<br>EFO_0000274 | UKBB     | European | -0.006 | 0.001 | 8.36E-08 | 336782 | 77891   | 1         | risk diff | 3.48E-05 |
| rs2584662 | rs2412099 | 17:47469186_A_G  | Number of self-reported non-cancer illnesses                                                  | EFO_0009801                                 | UKBB     | European | -0.011 | 0.002 | 2.09E-07 | 337159 | 0       | 1         | -         | 8.04E-05 |
| rs2584662 | rs2412099 | 17:47469186_A_G  | Comparative body size at age 10                                                               | -                                           | UKBB     | European | -0.009 | 0.002 | 4.60E-07 | 331693 | 0       | 1         | -         | 1.66E-04 |
| rs2584662 | rs2412099 | 17:47469186_A_G  | Treatment with ventolin 100micrograms inhaler                                                 | EFO_0007056                                 | UKBB     | European | -0.002 | 0.000 | 6.74E-07 | 337159 | 9712    | 1         | risk diff | 2.32E-04 |
| rs2584662 | rs2412099 | 17:47469186_A_G  | Coronary artery disease                                                                       | EFO_0000378;<br>EFO_0001645                 | 29212778 | Mixed    | -0.028 | 0.006 | 1.25E-06 | 547261 | 122733  | 2         | log OR    | 4.02E-04 |
| rs2584662 | rs2412099 | 17:47469186_A_G  | Medication for cholesterol, blood pressure or diabetes: none of the above                     | EFO_0007056                                 | UKBB     | European | 0.008  | 0.002 | 3.51E-06 | 154702 | 103004  | 1         | risk diff | 1.02E-03 |

| sentinel  | SNP       | chr_bp_eff_other | trait                                                                                         | efo                                         | pmid     | ancestry | beta   | se    | p        | n      | n_cases | n_studies | unit      | FDR      |
|-----------|-----------|------------------|-----------------------------------------------------------------------------------------------|---------------------------------------------|----------|----------|--------|-------|----------|--------|---------|-----------|-----------|----------|
| rs2584662 | rs2412099 | 17:47469186_A_G  | Coronary artery disease                                                                       | EFO_0000378;<br>EFO_0001645                 | 29212778 | Mixed    | -0.032 | 0.007 | 4.20E-06 | 296525 | 34541   | 1         | log OR    | 1.20E-03 |
| rs2584662 | rs2412099 | 17:47469186_A_G  | Allergic disease                                                                              | EFO_0003785                                 | 29083406 | European | -0.027 | 0.006 | 4.48E-06 | 360838 | 180129  | 13        | log OR    | 1.27E-03 |
| rs2584662 | rs2412099 | 17:47469186_A_G  | Atopic dermatitis                                                                             | EFO_0000274                                 | 26482879 | Mixed    | -0.079 | 0.018 | 1.08E-05 | 103066 | 18900   | 22        | log OR    | 2.75E-03 |
| rs2584662 | rs2412099 | 17:47469186_A_G  | Doctor diagnosed asthma                                                                       | EFO_0000270                                 | UKBB     | European | -0.007 | 0.002 | 2.91E-05 | 83529  | 10589   | 1         | risk diff | 6.54E-03 |
| rs2584662 | rs2412099 | 17:47469186_A_G  | Overall health rating                                                                         | -                                           | UKBB     | European | -0.007 | 0.002 | 3.33E-05 | 336020 | 0       | 1         | -         | 7.32E-03 |
| rs2584662 | rs2412099 | 17:47469186_A_G  | Long-standing illness, disability or infirmity                                                | -                                           | UKBB     | European | -0.005 | 0.001 | 4.64E-05 | 329663 | 107123  | 1         | risk diff | 9.80E-03 |
| rs2584662 | rs9916130 | 17:47469229_G_C  | Asthma                                                                                        | EFO_0000270                                 | UKBB     | European | 0.006  | 0.001 | 1.10E-12 | 336782 | 38791   | 1         | risk diff | 1.48E-09 |
| rs2584662 | rs9916130 | 17:47469229_G_C  | Self-reported asthma                                                                          | EFO_0000270                                 | UKBB     | European | 0.006  | 0.001 | 6.94E-12 | 337159 | 39049   | 1         | risk diff | 7.54E-09 |
| rs2584662 | rs9916130 | 17:47469229_G_C  | Eosinophil count                                                                              | EFO_0004586                                 | 27863252 | European | 0.026  | 0.004 | 9.66E-12 | 173480 | 0       | 2         | IVNT      | 1.02E-08 |
| rs2584662 | rs9916130 | 17:47469229_G_C  | Sum eosinophil basophil counts                                                                | EFO_0004586                                 | 27863252 | European | 0.025  | 0.004 | 1.73E-11 | 173480 | 0       | 2         | IVNT      | 1.72E-08 |
| rs2584662 | rs9916130 | 17:47469229_G_C  | Eosinophil percentage of white cells                                                          | EFO_0004586                                 | 27863252 | European | 0.024  | 0.004 | 7.63E-11 | 173480 | 0       | 2         | IVNT      | 6.50E-08 |
| rs2584662 | rs9916130 | 17:47469229_G_C  | No blood clot, bronchitis, emphysema, asthma, rhinitis, eczema or allergy diagnosed by doctor | -                                           | UKBB     | European | -0.008 | 0.001 | 1.82E-10 | 336782 | 228530  | 1         | risk diff | 1.43E-07 |
| rs2584662 | rs9916130 | 17:47469229_G_C  | Eosinophil percentage of granulocytes                                                         | EFO_0004586                                 | 27863252 | European | 0.023  | 0.004 | 6.52E-10 | 173480 | 0       | 2         | IVNT      | 4.65E-07 |
| rs2584662 | rs9916130 | 17:47469229_G_C  | Neutrophil percentage of granulocytes                                                         | EFO_0004586                                 | 27863252 | European | -0.023 | 0.004 | 9.11E-10 | 173480 | 0       | 2         | IVNT      | 6.17E-07 |
| rs2584662 | rs9916130 | 17:47469229_G_C  | Vascular or heart problems diagnosed by doctor: none of the above                             | -                                           | UKBB     | European | -0.006 | 0.001 | 2.56E-08 | 336683 | 236530  | 1         | risk diff | 1.21E-05 |
| rs2584662 | rs9916130 | 17:47469229_G_C  | Wheeze or whistling in the chest in last year                                                 | EFO_0009715                                 | UKBB     | European | 0.006  | 0.001 | 7.74E-08 | 331257 | 68531   | 1         | risk diff | 3.26E-05 |
| rs2584662 | rs9916130 | 17:47469229_G_C  | Hayfever, allergic rhinitis or eczema                                                         | EFO_0003956;<br>EFO_0005854;<br>EFO_0000274 | UKBB     | European | 0.005  | 0.001 | 3.91E-07 | 336782 | 77891   | 1         | risk diff | 1.44E-04 |
| rs2584662 | rs9916130 | 17:47469229_G_C  | Atopic dermatitis                                                                             | EFO_0000274                                 | 26482879 | Mixed    | 0.095  | 0.019 | 4.11E-07 | 103066 | 18900   | 22        | log OR    | 1.50E-04 |
| rs2584662 | rs9916130 | 17:47469229_G_C  | Number of treatments or medications taken                                                     | EFO_0007056                                 | UKBB     | European | 0.010  | 0.002 | 5.24E-07 | 337159 | 0       | 1         | -         | 1.88E-04 |
| rs2584662 | rs9916130 | 17:47469229_G_C  | Comparative body size at age 10                                                               | -                                           | UKBB     | European | 0.009  | 0.002 | 6.72E-07 | 331693 | 0       | 1         | -         | 2.32E-04 |
| rs2584662 | rs9916130 | 17:47469229_G_C  | Coronary artery disease                                                                       | EFO_0000378;<br>EFO_0001645                 | 29212778 | Mixed    | 0.029  | 0.006 | 1.31E-06 | 547261 | 122733  | 2         | log OR    | 4.18E-04 |
| rs2584662 | rs9916130 | 17:47469229_G_C  | Impedance of whole body                                                                       | -                                           | UKBB     | European | -0.009 | 0.002 | 1.63E-06 | 331284 | 0       | 1         | IVNT      | 5.09E-04 |
| rs2584662 | rs9916130 | 17:47469229_G_C  | Taking other prescription medications                                                         | EFO_0007056                                 | UKBB     | European | 0.006  | 0.001 | 2.74E-06 | 336330 | 158113  | 1         | risk diff | 8.19E-04 |
| rs2584662 | rs9916130 | 17:47469229_G_C  | Impedance of leg left                                                                         | -                                           | UKBB     | European | -0.011 | 0.002 | 3.46E-06 | 331296 | 0       | 1         | IVNT      | 1.00E-03 |
| rs2584662 | rs9916130 | 17:47469229_G_C  | Impedance of leg right                                                                        | -                                           | UKBB     | European | -0.011 | 0.002 | 4.39E-06 | 331301 | 0       | 1         | IVNT      | 1.25E-03 |
| rs2584662 | rs9916130 | 17:47469229_G_C  | Vascular or heart problems diagnosed by doctor: high blood pressure                           | EFO_0004325                                 | UKBB     | European | 0.005  | 0.001 | 6.25E-06 | 336683 | 91033   | 1         | risk diff | 1.72E-03 |
| rs2584662 | rs9916130 | 17:47469229_G_C  | Coronary artery disease                                                                       | EFO_0000378;<br>EFO_0001645                 | 29212778 | Mixed    | 0.033  | 0.007 | 6.50E-06 | 296525 | 34541   | 1         | log OR    | 1.78E-03 |
| rs2584662 | rs9916130 | 17:47469229_G_C  | Number of self-reported non-cancer illnesses                                                  | EFO_0009801                                 | UKBB     | European | 0.009  | 0.002 | 1.38E-05 | 337159 | 0       | 1         | -         | 3.39E-03 |
| rs2584662 | rs9916130 | 17:47469229_G_C  | Medication for cholesterol, blood pressure or diabetes: blood pressure medication             | EFO_0007056                                 | UKBB     | European | 0.007  | 0.002 | 1.42E-05 | 154702 | 38548   | 1         | risk diff | 3.48E-03 |
| rs2584662 | rs9916130 | 17:47469229_G_C  | Self-reported hypertension                                                                    | EFO_0000537                                 | UKBB     | European | 0.005  | 0.001 | 2.88E-05 | 337159 | 87690   | 1         | risk diff | 6.52E-03 |
| rs2584662 | rs9916130 | 17:47469229_G_C  | Allergic disease                                                                              | EFO_0003785                                 | 29083406 | European | 0.025  | 0.006 | 3.72E-05 | 360838 | 180129  | 13        | log OR    | 8.07E-03 |
| rs2584662 | rs2584662 | 17:47470487_C_A  | Eosinophil count                                                                              | EFO_0004586                                 | 27863252 | European | -0.027 | 0.004 | 8.30E-14 | 173480 | 0       | 2         | IVNT      | 1.53E-10 |
| rs2584662 | rs2584662 | 17:47470487_C_A  | Asthma                                                                                        | EFO_0000270                                 | UKBB     | European | -0.006 | 0.001 | 9.27E-14 | 336782 | 38791   | 1         | risk diff | 1.66E-10 |
| rs2584662 | rs2584662 | 17:47470487_C_A  | Vascular or heart problems diagnosed by doctor: none of the above                             | -                                           | UKBB     | European | 0.008  | 0.001 | 4.10E-13 | 336683 | 236530  | 1         | risk diff | 6.21E-10 |
| rs2584662 | rs2584662 | 17:47470487_C_A  | Sum eosinophil basophil counts                                                                | EFO_0004586                                 | 27863252 | European | -0.026 | 0.004 | 6.54E-13 | 173480 | 0       | 2         | IVNT      | 9.46E-10 |
| rs2584662 | rs2584662 | 17:47470487_C_A  | Impedance of whole body                                                                       | -                                           | UKBB     | European | 0.013  | 0.002 | 1.39E-12 | 331284 | 0       | 1         | IVNT      | 1.74E-09 |
| rs2584662 | rs2584662 | 17:47470487_C_A  | No blood clot, bronchitis, emphysema, asthma, rhinitis, eczema or allergy diagnosed by doctor | -                                           | UKBB     | European | 0.008  | 0.001 | 1.40E-12 | 336782 | 228530  | 1         | risk diff | 1.74E-09 |
| rs2584662 | rs2584662 | 17:47470487_C_A  | Self-reported asthma                                                                          | EFO_0000270                                 | UKBB     | European | -0.006 | 0.001 | 1.99E-12 | 337159 | 39049   | 1         | risk diff | 2.36E-09 |

| sentinel  | SNP       | chr_bp_eff_other | trait                                                                                         | efo                                         | pmid     | ancestry | beta   | se    | p        | n      | n_cases | n_studies | unit      | FDR      |
|-----------|-----------|------------------|-----------------------------------------------------------------------------------------------|---------------------------------------------|----------|----------|--------|-------|----------|--------|---------|-----------|-----------|----------|
| rs2584662 | rs2584662 | 17:47470487_C_A  | Impedance of leg right                                                                        | -                                           | UKBB     | European | 0.015  | 0.002 | 8.55E-12 | 331301 | 0       | 1         | IVNT      | 9.13E-09 |
| rs2584662 | rs2584662 | 17:47470487_C_A  | Impedance of leg left                                                                         | -                                           | UKBB     | European | 0.015  | 0.002 | 9.92E-12 | 331296 | 0       | 1         | IVNT      | 1.05E-08 |
| rs2584662 | rs2584662 | 17:47470487_C_A  | Eosinophil percentage of white cells                                                          | EFO_0004586                                 | 27863252 | European | -0.024 | 0.004 | 3.29E-11 | 173480 | 0       | 2         | IVNT      | 3.06E-08 |
| rs2584662 | rs2584662 | 17:47470487_C_A  | Vascular or heart problems diagnosed by doctor: high blood pressure                           | EFO_0004325                                 | UKBB     | European | -0.007 | 0.001 | 1.71E-10 | 336683 | 91033   | 1         | risk diff | 1.35E-07 |
| rs2584662 | rs2584662 | 17:47470487_C_A  | Eosinophil percentage of granulocytes                                                         | EFO_0004586                                 | 27863252 | European | -0.022 | 0.004 | 6.98E-10 | 173480 | 0       | 2         | IVNT      | 4.92E-07 |
| rs2584662 | rs2584662 | 17:47470487_C_A  | Wheeze or whistling in the chest in last year                                                 | EFO_0009715                                 | UKBB     | European | -0.006 | 0.001 | 1.09E-09 | 331257 | 68531   | 1         | risk diff | 7.10E-07 |
| rs2584662 | rs2584662 | 17:47470487_C_A  | Impedance of arm left                                                                         | -                                           | UKBB     | European | 0.010  | 0.002 | 2.04E-09 | 331292 | 0       | 1         | IVNT      | 1.20E-06 |
| rs2584662 | rs2584662 | 17:47470487_C_A  | Self-reported hypertension                                                                    | EFO_0000537                                 | UKBB     | European | -0.006 | 0.001 | 4.40E-09 | 337159 | 87690   | 1         | risk diff | 2.38E-06 |
| rs2584662 | rs2584662 | 17:47470487_C_A  | Neutrophil percentage of granulocytes                                                         | EFO_0004586                                 | 27863252 | European | 0.021  | 0.004 | 7.30E-09 | 173480 | 0       | 2         | IVNT      | 3.78E-06 |
| rs2584662 | rs2584662 | 17:47470487_C_A  | Height                                                                                        | EFO_0004339                                 | UKBB     | European | 0.010  | 0.002 | 1.33E-08 | 336474 | 0       | 1         | IVNT      | 6.56E-06 |
| rs2584662 | rs2584662 | 17:47470487_C_A  | Medication for cholesterol, blood pressure or diabetes: blood pressure medication             | EFO_0007056                                 | UKBB     | European | -0.009 | 0.002 | 1.33E-08 | 154702 | 38548   | 1         | risk diff | 6.56E-06 |
| rs2584662 | rs2584662 | 17:47470487_C_A  | Impedance of arm right                                                                        | -                                           | UKBB     | European | 0.009  | 0.002 | 5.04E-08 | 331279 | 0       | 1         | IVNT      | 2.23E-05 |
| rs2584662 | rs2584662 | 17:47470487_C_A  | Taking other prescription medications                                                         | EFO_0007056                                 | UKBB     | European | -0.007 | 0.001 | 6.04E-08 | 336330 | 158113  | 1         | risk diff | 2.64E-05 |
| rs2584662 | rs2584662 | 17:47470487_C_A  | Number of treatments or medications taken                                                     | EFO_0007056                                 | UKBB     | European | -0.011 | 0.002 | 7.62E-08 | 337159 | 0       | 1         | -         | 3.22E-05 |
| rs2584662 | rs2584662 | 17:47470487_C_A  | Hayfever, allergic rhinitis or eczema                                                         | EFO_0003956;<br>EFO_0005854;<br>EFO_0000274 | UKBB     | European | -0.006 | 0.001 | 9.05E-08 | 336782 | 77891   | 1         | risk diff | 3.74E-05 |
| rs2584662 | rs2584662 | 17:47470487_C_A  | Number of self-reported non-cancer illnesses                                                  | EFO_0009801                                 | UKBB     | European | -0.011 | 0.002 | 2.06E-07 | 337159 | 0       | 1         | -         | 7.92E-05 |
| rs2584662 | rs2584662 | 17:47470487_C_A  | Comparative body size at age 10                                                               | -                                           | UKBB     | European | -0.008 | 0.002 | 5.56E-07 | 331693 | 0       | 1         | -         | 1.97E-04 |
| rs2584662 | rs2584662 | 17:47470487_C_A  | Treatment with ventolin 100micrograms inhaler                                                 | EFO_0007056                                 | UKBB     | European | -0.002 | 0.000 | 6.59E-07 | 337159 | 9712    | 1         | risk diff | 2.28E-04 |
| rs2584662 | rs2584662 | 17:47470487_C_A  | Coronary artery disease                                                                       | EFO_0000378;<br>EFO_0001645                 | 29212778 | Mixed    | -0.028 | 0.006 | 1.88E-06 | 547261 | 122733  | 2         | log OR    | 5.80E-04 |
| rs2584662 | rs2584662 | 17:47470487_C_A  | Medication for cholesterol, blood pressure or diabetes: none of the above                     | EFO_0007056                                 | UKBB     | European | 0.008  | 0.002 | 3.95E-06 | 154702 | 103004  | 1         | risk diff | 1.13E-03 |
| rs2584662 | rs2584662 | 17:47470487_C_A  | Coronary artery disease                                                                       | EFO_0000378;<br>EFO_0001645                 | 29212778 | Mixed    | -0.033 | 0.007 | 4.10E-06 | 296525 | 34541   | 1         | log OR    | 1.17E-03 |
| rs2584662 | rs2584662 | 17:47470487_C_A  | Atopic dermatitis                                                                             | EFO_0000274                                 | 26482879 | Mixed    | -0.081 | 0.018 | 7.73E-06 | 103066 | 18900   | 22        | log OR    | 2.07E-03 |
| rs2584662 | rs2584662 | 17:47470487_C_A  | Allergic disease                                                                              | EFO_0003785                                 | 29083406 | European | -0.026 | 0.006 | 8.71E-06 | 360838 | 180129  | 13        | log OR    | 2.30E-03 |
| rs2584662 | rs2584662 | 17:47470487_C_A  | Doctor diagnosed asthma                                                                       | EFO_0000270                                 | UKBB     | European | -0.007 | 0.002 | 2.97E-05 | 83529  | 10589   | 1         | risk diff | 6.67E-03 |
| rs2584662 | rs2584662 | 17:47470487_C_A  | Overall health rating                                                                         | -                                           | UKBB     | European | -0.007 | 0.002 | 3.57E-05 | 336020 | 0       | 1         | -         | 7.78E-03 |
| rs2584662 | rs2584662 | 17:47470487_C_A  | Long-standing illness, disability or infirmity                                                | -                                           | UKBB     | European | -0.005 | 0.001 | 4.54E-05 | 329663 | 107123  | 1         | risk diff | 9.61E-03 |
| rs2584662 | rs2584661 | 17:47470534_A_G  | Asthma                                                                                        | EFO_0000270                                 | UKBB     | European | 0.006  | 0.001 | 2.98E-12 | 336782 | 38791   | 1         | risk diff | 3.41E-09 |
| rs2584662 | rs2584661 | 17:47470534_A_G  | Self-reported asthma                                                                          | EFO_0000270                                 | UKBB     | European | 0.006  | 0.001 | 1.80E-11 | 337159 | 39049   | 1         | risk diff | 1.79E-08 |
| rs2584662 | rs2584661 | 17:47470534_A_G  | Eosinophil count                                                                              | EFO_0004586                                 | 27863252 | European | 0.025  | 0.004 | 2.95E-11 | 173480 | 0       | 2         | IVNT      | 2.81E-08 |
| rs2584662 | rs2584661 | 17:47470534_A_G  | Sum eosinophil basophil counts                                                                | EFO_0004586                                 | 27863252 | European | 0.025  | 0.004 | 3.61E-11 | 173480 | 0       | 2         | IVNT      | 3.32E-08 |
| rs2584662 | rs2584661 | 17:47470534_A_G  | Eosinophil percentage of white cells                                                          | EFO_0004586                                 | 27863252 | European | 0.024  | 0.004 | 2.63E-10 | 173480 | 0       | 2         | IVNT      | 2.03E-07 |
| rs2584662 | rs2584661 | 17:47470534_A_G  | No blood clot, bronchitis, emphysema, asthma, rhinitis, eczema or allergy diagnosed by doctor | -                                           | UKBB     | European | -0.007 | 0.001 | 5.38E-10 | 336782 | 228530  | 1         | risk diff | 3.90E-07 |
| rs2584662 | rs2584661 | 17:47470534_A_G  | Eosinophil percentage of granulocytes                                                         | EFO_0004586                                 | 27863252 | European | 0.022  | 0.004 | 2.62E-09 | 173480 | 0       | 2         | IVNT      | 1.53E-06 |
| rs2584662 | rs2584661 | 17:47470534_A_G  | Neutrophil percentage of granulocytes                                                         | EFO_0004586                                 | 27863252 | European | -0.022 | 0.004 | 3.32E-09 | 173480 | 0       | 2         | IVNT      | 1.90E-06 |
| rs2584662 | rs2584661 | 17:47470534_A_G  | Vascular or heart problems diagnosed by doctor: none of the above                             | -                                           | UKBB     | European | -0.006 | 0.001 | 3.33E-08 | 336683 | 236530  | 1         | risk diff | 1.54E-05 |
| rs2584662 | rs2584661 | 17:47470534_A_G  | Wheeze or whistling in the chest in last year                                                 | EFO_0009715                                 | UKBB     | European | 0.005  | 0.001 | 3.93E-07 | 331257 | 68531   | 1         | risk diff | 1.44E-04 |
| rs2584662 | rs2584661 | 17:47470534_A_G  | Hayfever, allergic rhinitis or eczema                                                         | EFO_0003956;<br>EFO_0005854;<br>EFO_0000274 | UKBB     | European | 0.005  | 0.001 | 6.32E-07 | 336782 | 77891   | 1         | risk diff | 2.20E-04 |
| rs2584662 | rs2584661 | 17:47470534_A_G  | Comparative body size at age 10                                                               | -                                           | UKBB     | European | 0.009  | 0.002 | 7.88E-07 | 331693 | 0       | 1         | -         | 2.68E-04 |

| sentinel  | SNP       | chr_bp_eff_other | trait                                                                                            | efo                                         | pmid     | ancestry | beta   | se    | p        | n      | n_cases | n_studies | unit      | FDR      |
|-----------|-----------|------------------|--------------------------------------------------------------------------------------------------|---------------------------------------------|----------|----------|--------|-------|----------|--------|---------|-----------|-----------|----------|
| rs2584662 | rs2584661 | 17:47470534_A_G  | Number of treatments or medications taken                                                        | EFO_0007056                                 | UKBB     | European | 0.010  | 0.002 | 9.12E-07 | 337159 | 0       | 1         | -         | 3.05E-04 |
| rs2584662 | rs2584661 | 17:47470534_A_G  | Coronary artery disease                                                                          | EFO_0000378;<br>EFO_0001645                 | 29212778 | Mixed    | 0.028  | 0.006 | 2.87E-06 | 547261 | 122733  | 2         | log OR    | 8.54E-04 |
| rs2584662 | rs2584661 | 17:47470534_A_G  | Impedance of whole body                                                                          | -                                           | UKBB     | European | -0.009 | 0.002 | 2.93E-06 | 331284 | 0       | 1         | IVNT      | 8.70E-04 |
| rs2584662 | rs2584661 | 17:47470534_A_G  | Atopic dermatitis                                                                                | EFO_0000274                                 | 26482879 | Mixed    | 0.087  | 0.019 | 4.82E-06 | 103066 | 18900   | 22        | log OR    | 1.36E-03 |
| rs2584662 | rs2584661 | 17:47470534_A_G  | Impedance of leg left                                                                            | -                                           | UKBB     | European | -0.011 | 0.002 | 5.09E-06 | 331296 | 0       | 1         | IVNT      | 1.42E-03 |
| rs2584662 | rs2584661 | 17:47470534_A_G  | Vascular or heart problems diagnosed by doctor:<br>high blood pressure                           | EFO_0004325                                 | UKBB     | European | 0.005  | 0.001 | 6.32E-06 | 336683 | 91033   | 1         | risk diff | 1.74E-03 |
| rs2584662 | rs2584661 | 17:47470534_A_G  | Taking other prescription medications                                                            | EFO_0007056                                 | UKBB     | European | 0.006  | 0.001 | 7.65E-06 | 336330 | 158113  | 1         | risk diff | 2.06E-03 |
| rs2584662 | rs2584661 | 17:47470534_A_G  | Impedance of leg right                                                                           | -                                           | UKBB     | European | -0.010 | 0.002 | 9.04E-06 | 331301 | 0       | 1         | IVNT      | 2.38E-03 |
| rs2584662 | rs2584661 | 17:47470534_A_G  | Coronary artery disease                                                                          | EFO_0000378;<br>EFO_0001645                 | 29212778 | Mixed    | 0.032  | 0.007 | 1.00E-05 | 296525 | 34541   | 1         | log OR    | 2.58E-03 |
| rs2584662 | rs2584661 | 17:47470534_A_G  | Number of self-reported non-cancer illnesses                                                     | EFO_0009801                                 | UKBB     | European | 0.009  | 0.002 | 2.59E-05 | 337159 | 0       | 1         | -         | 5.94E-03 |
| rs2584662 | rs2584661 | 17:47470534_A_G  | Self-reported hypertension                                                                       | EFO_0000537                                 | UKBB     | European | 0.005  | 0.001 | 3.01E-05 | 337159 | 87690   | 1         | risk diff | 6.74E-03 |
| rs2584662 | rs2584661 | 17:47470534_A_G  | Medication for cholesterol, blood pressure or<br>diabetes: blood pressure medication             | EFO_0007056                                 | UKBB     | European | 0.007  | 0.002 | 3.12E-05 | 154702 | 38548   | 1         | risk diff | 6.91E-03 |
| rs2584662 | rs2671657 | 17:47473616_A_G  | Asthma                                                                                           | EFO_0000270                                 | UKBB     | European | -0.006 | 0.001 | 9.18E-14 | 336782 | 38791   | 1         | risk diff | 1.65E-10 |
| rs2584662 | rs2671657 | 17:47473616_A_G  | Eosinophil count                                                                                 | EFO_0004586                                 | 27863252 | European | -0.027 | 0.004 | 2.19E-13 | 173480 | 0       | 2         | IVNT      | 3.63E-10 |
| rs2584662 | rs2671657 | 17:47473616_A_G  | Vascular or heart problems diagnosed by doctor:<br>none of the above                             | -                                           | UKBB     | European | 0.008  | 0.001 | 4.78E-13 | 336683 | 236530  | 1         | risk diff | 7.07E-10 |
| rs2584662 | rs2671657 | 17:47473616_A_G  | Impedance of whole body                                                                          | -                                           | UKBB     | European | 0.013  | 0.002 | 1.22E-12 | 331284 | 0       | 1         | IVNT      | 1.59E-09 |
| rs2584662 | rs2671657 | 17:47473616_A_G  | No blood clot, bronchitis, emphysema, asthma,<br>rhinitis, eczema or allergy diagnosed by doctor | -                                           | UKBB     | European | 0.008  | 0.001 | 1.34E-12 | 336782 | 228530  | 1         | risk diff | 1.68E-09 |
| rs2584662 | rs2671657 | 17:47473616_A_G  | Sum eosinophil basophil counts                                                                   | EFO_0004586                                 | 27863252 | European | -0.026 | 0.004 | 1.56E-12 | 173480 | 0       | 2         | IVNT      | 1.90E-09 |
| rs2584662 | rs2671657 | 17:47473616_A_G  | Self-reported asthma                                                                             | EFO_0000270                                 | UKBB     | European | -0.006 | 0.001 | 2.03E-12 | 337159 | 39049   | 1         | risk diff | 2.40E-09 |
| rs2584662 | rs2671657 | 17:47473616_A_G  | Impedance of leg right                                                                           | -                                           | UKBB     | European | 0.015  | 0.002 | 1.33E-11 | 331301 | 0       | 1         | IVNT      | 1.35E-08 |
| rs2584662 | rs2671657 | 17:47473616_A_G  | Impedance of leg left                                                                            | -                                           | UKBB     | European | 0.015  | 0.002 | 1.40E-11 | 331296 | 0       | 1         | IVNT      | 1.41E-08 |
| rs2584662 | rs2671657 | 17:47473616_A_G  | Eosinophil percentage of white cells                                                             | EFO_0004586                                 | 27863252 | European | -0.024 | 0.004 | 6.13E-11 | 173480 | 0       | 2         | IVNT      | 5.31E-08 |
| rs2584662 | rs2671657 | 17:47473616_A_G  | Vascular or heart problems diagnosed by doctor:<br>high blood pressure                           | EFO_0004325                                 | UKBB     | European | -0.007 | 0.001 | 1.94E-10 | 336683 | 91033   | 1         | risk diff | 1.52E-07 |
| rs2584662 | rs2671657 | 17:47473616_A_G  | Wheeze or whistling in the chest in last year                                                    | EFO_0009715                                 | UKBB     | European | -0.006 | 0.001 | 7.90E-10 | 331257 | 68531   | 1         | risk diff | 5.48E-07 |
| rs2584662 | rs2671657 | 17:47473616_A_G  | Eosinophil percentage of granulocytes                                                            | EFO_0004586                                 | 27863252 | European | -0.022 | 0.004 | 9.28E-10 | 173480 | 0       | 2         | IVNT      | 6.26E-07 |
| rs2584662 | rs2671657 | 17:47473616_A_G  | Impedance of arm left                                                                            | -                                           | UKBB     | European | 0.011  | 0.002 | 1.47E-09 | 331292 | 0       | 1         | IVNT      | 9.05E-07 |
| rs2584662 | rs2671657 | 17:47473616_A_G  | Self-reported hypertension                                                                       | EFO_0000537                                 | UKBB     | European | -0.006 | 0.001 | 4.32E-09 | 337159 | 87690   | 1         | risk diff | 2.35E-06 |
| rs2584662 | rs2671657 | 17:47473616_A_G  | Neutrophil percentage of granulocytes                                                            | EFO_0004586                                 | 27863252 | European | 0.021  | 0.004 | 8.35E-09 | 173480 | 0       | 2         | IVNT      | 4.27E-06 |
| rs2584662 | rs2671657 | 17:47473616_A_G  | Medication for cholesterol, blood pressure or<br>diabetes: blood pressure medication             | EFO_0007056                                 | UKBB     | European | -0.009 | 0.002 | 1.20E-08 | 154702 | 38548   | 1         | risk diff | 6.01E-06 |
| rs2584662 | rs2671657 | 17:47473616_A_G  | Height                                                                                           | EFO_0004339                                 | UKBB     | European | 0.010  | 0.002 | 2.20E-08 | 336474 | 0       | 1         | IVNT      | 1.06E-05 |
| rs2584662 | rs2671657 | 17:47473616_A_G  | Impedance of arm right                                                                           | -                                           | UKBB     | European | 0.010  | 0.002 | 3.95E-08 | 331279 | 0       | 1         | IVNT      | 1.79E-05 |
| rs2584662 | rs2671657 | 17:47473616_A_G  | Number of treatments or medications taken                                                        | EFO_0007056                                 | UKBB     | European | -0.011 | 0.002 | 5.70E-08 | 337159 | 0       | 1         | -         | 2.51E-05 |
| rs2584662 | rs2671657 | 17:47473616_A_G  | Taking other prescription medications                                                            | EFO_0007056                                 | UKBB     | European | -0.007 | 0.001 | 5.82E-08 | 336330 | 158113  | 1         | risk diff | 2.56E-05 |
| rs2584662 | rs2671657 | 17:47473616_A_G  | Hayfever, allergic rhinitis or eczema                                                            | EFO_0003956;<br>EFO_0005854;<br>EFO_0000274 | UKBB     | European | -0.006 | 0.001 | 9.21E-08 | 336782 | 77891   | 1         | risk diff | 3.80E-05 |
| rs2584662 | rs2671657 | 17:47473616_A_G  | Number of self-reported non-cancer illnesses                                                     | EFO_0009801                                 | UKBB     | European | -0.011 | 0.002 | 2.11E-07 | 337159 | 0       | 1         | -         | 8.11E-05 |
| rs2584662 | rs2671657 | 17:47473616_A_G  | Comparative body size at age 10                                                                  | -                                           | UKBB     | European | -0.008 | 0.002 | 5.33E-07 | 331693 | 0       | 1         | -         | 1.90E-04 |
| rs2584662 | rs2671657 | 17:47473616_A_G  | Treatment with ventolin 100micrograms inhaler                                                    | EFO_0007056                                 | UKBB     | European | -0.002 | 0.000 | 6.58E-07 | 337159 | 9712    | 1         | risk diff | 2.28E-04 |
| rs2584662 | rs2671657 | 17:47473616_A_G  | Coronary artery disease                                                                          | EFO_0000378;<br>EFO_0001645                 | 29212778 | Mixed    | -0.028 | 0.006 | 1.01E-06 | 547261 | 122733  | 2         | log OR    | 3.30E-04 |

| sentinel  | SNP       | chr_bp_eff_other | trait                                                                                         | efo                                         | pmid     | ancestry | beta   | se    | p        | n      | n_cases | n_studies | unit      | FDR      |
|-----------|-----------|------------------|-----------------------------------------------------------------------------------------------|---------------------------------------------|----------|----------|--------|-------|----------|--------|---------|-----------|-----------|----------|
| rs2584662 | rs2671657 | 17:47473616_A_G  | Medication for cholesterol, blood pressure or diabetes: none of the above                     | EFO_0007056                                 | UKBB     | European | 0.008  | 0.002 | 3.26E-06 | 154702 | 103004  | 1         | risk diff | 9.55E-04 |
| rs2584662 | rs2671657 | 17:47473616_A_G  | Coronary artery disease                                                                       | EFO_0000378;<br>EFO_0001645                 | 29212778 | Mixed    | -0.032 | 0.007 | 5.60E-06 | 296525 | 34541   | 1         | log OR    | 1.55E-03 |
| rs2584662 | rs2671657 | 17:47473616_A_G  | Allergic disease                                                                              | EFO_0003785                                 | 29083406 | European | -0.027 | 0.006 | 6.03E-06 | 360838 | 180129  | 13        | log OR    | 1.67E-03 |
| rs2584662 | rs2671657 | 17:47473616_A_G  | Atopic dermatitis                                                                             | EFO_0000274                                 | 26482879 | Mixed    | -0.080 | 0.018 | 1.04E-05 | 103066 | 18900   | 22        | log OR    | 2.67E-03 |
| rs2584662 | rs2671657 | 17:47473616_A_G  | Doctor diagnosed asthma                                                                       | EFO_0000270                                 | UKBB     | European | -0.007 | 0.002 | 2.98E-05 | 83529  | 10589   | 1         | risk diff | 6.68E-03 |
| rs2584662 | rs2671657 | 17:47473616_A_G  | Long-standing illness, disability or infirmity                                                | -                                           | UKBB     | European | -0.005 | 0.001 | 3.44E-05 | 329663 | 107123  | 1         | risk diff | 7.53E-03 |
| rs2584662 | rs2671657 | 17:47473616_A_G  | Overall health rating                                                                         | -                                           | UKBB     | European | -0.007 | 0.002 | 3.57E-05 | 336020 | 0       | 1         | -         | 7.78E-03 |
| rs2584662 | rs2671659 | 17:47474529_A_G  | Asthma                                                                                        | EFO_0000270                                 | UKBB     | European | -0.006 | 0.001 | 3.33E-12 | 336782 | 38791   | 1         | risk diff | 3.76E-09 |
| rs2584662 | rs2671659 | 17:47474529_A_G  | Self-reported asthma                                                                          | EFO_0000270                                 | UKBB     | European | -0.005 | 0.001 | 2.15E-11 | 337159 | 39049   | 1         | risk diff | 2.10E-08 |
| rs2584662 | rs2671659 | 17:47474529_A_G  | Eosinophil count                                                                              | EFO_0004586                                 | 27863252 | European | -0.025 | 0.004 | 4.39E-11 | 173480 | 0       | 2         | IVNT      | 3.99E-08 |
| rs2584662 | rs2671659 | 17:47474529_A_G  | Sum eosinophil basophil counts                                                                | EFO_0004586                                 | 27863252 | European | -0.025 | 0.004 | 5.44E-11 | 173480 | 0       | 2         | IVNT      | 4.84E-08 |
| rs2584662 | rs2671659 | 17:47474529_A_G  | Eosinophil percentage of white cells                                                          | EFO_0004586                                 | 27863252 | European | -0.023 | 0.004 | 4.17E-10 | 173480 | 0       | 2         | IVNT      | 3.10E-07 |
| rs2584662 | rs2671659 | 17:47474529_A_G  | No blood clot, bronchitis, emphysema, asthma, rhinitis, eczema or allergy diagnosed by doctor | -                                           | UKBB     | European | 0.007  | 0.001 | 7.61E-10 | 336782 | 228530  | 1         | risk diff | 5.33E-07 |
| rs2584662 | rs2671659 | 17:47474529_A_G  | Asthma                                                                                        | EFO_0000270                                 | 29273806 | European | -0.083 | 0.014 | 3.70E-09 | 127669 | 19954   | 56        | log OR    | 2.06E-06 |
| rs2584662 | rs2671659 | 17:47474529_A_G  | Eosinophil percentage of granulocytes                                                         | EFO_0004586                                 | 27863252 | European | -0.022 | 0.004 | 3.93E-09 | 173480 | 0       | 2         | IVNT      | 2.16E-06 |
| rs2584662 | rs2671659 | 17:47474529_A_G  | Neutrophil percentage of granulocytes                                                         | EFO_0004586                                 | 27863252 | European | 0.022  | 0.004 | 5.06E-09 | 173480 | 0       | 2         | IVNT      | 2.70E-06 |
| rs2584662 | rs2671659 | 17:47474529_A_G  | Asthma                                                                                        | EFO_0000270                                 | 29273806 | Mixed    | -0.078 | 0.014 | 9.58E-09 | 142486 | 23948   | 66        | log OR    | 4.89E-06 |
| rs2584662 | rs2671659 | 17:47474529_A_G  | Vascular or heart problems diagnosed by doctor: none of the above                             | -                                           | UKBB     | European | 0.006  | 0.001 | 3.47E-08 | 336683 | 236530  | 1         | risk diff | 1.59E-05 |
| rs2584662 | rs2671659 | 17:47474529_A_G  | Wheeze or whistling in the chest in last year                                                 | EFO_0009715                                 | UKBB     | European | -0.005 | 0.001 | 3.15E-07 | 331257 | 68531   | 1         | risk diff | 1.18E-04 |
| rs2584662 | rs2671659 | 17:47474529_A_G  | Number of treatments or medications taken                                                     | EFO_0007056                                 | UKBB     | European | -0.010 | 0.002 | 6.95E-07 | 337159 | 0       | 1         | -         | 2.38E-04 |
| rs2584662 | rs2671659 | 17:47474529_A_G  | Comparative body size at age 10                                                               | -                                           | UKBB     | European | -0.009 | 0.002 | 8.56E-07 | 331693 | 0       | 1         | -         | 2.89E-04 |
| rs2584662 | rs2671659 | 17:47474529_A_G  | Hayfever, allergic rhinitis or eczema                                                         | EFO_0003956;<br>EFO_0005854;<br>EFO_0000274 | UKBB     | European | -0.005 | 0.001 | 9.19E-07 | 336782 | 77891   | 1         | risk diff | 3.05E-04 |
| rs2584662 | rs2671659 | 17:47474529_A_G  | Atopic dermatitis                                                                             | EFO_0000274                                 | 26482879 | Mixed    | -0.092 | 0.019 | 1.01E-06 | 103066 | 18900   | 22        | log OR    | 3.30E-04 |
| rs2584662 | rs2671659 | 17:47474529_A_G  | Impedance of whole body                                                                       | -                                           | UKBB     | European | 0.009  | 0.002 | 2.36E-06 | 331284 | 0       | 1         | IVNT      | 7.14E-04 |
| rs2584662 | rs2671659 | 17:47474529_A_G  | Coronary artery disease                                                                       | EFO_0000378;<br>EFO_0001645                 | 29212778 | Mixed    | -0.028 | 0.006 | 2.65E-06 | 547261 | 122733  | 2         | log OR    | 7.96E-04 |
| rs2584662 | rs2671659 | 17:47474529_A_G  | Impedance of leg left                                                                         | -                                           | UKBB     | European | 0.011  | 0.002 | 5.05E-06 | 331296 | 0       | 1         | IVNT      | 1.42E-03 |
| rs2584662 | rs2671659 | 17:47474529_A_G  | Vascular or heart problems diagnosed by doctor: high blood pressure                           | EFO_0004325                                 | UKBB     | European | -0.005 | 0.001 | 6.43E-06 | 336683 | 91033   | 1         | risk diff | 1.76E-03 |
| rs2584662 | rs2671659 | 17:47474529_A_G  | Impedance of leg right                                                                        | -                                           | UKBB     | European | 0.010  | 0.002 | 9.26E-06 | 331301 | 0       | 1         | IVNT      | 2.42E-03 |
| rs2584662 | rs2671659 | 17:47474529_A_G  | Taking other prescription medications                                                         | EFO_0007056                                 | UKBB     | European | -0.006 | 0.001 | 9.28E-06 | 336330 | 158113  | 1         | risk diff | 2.42E-03 |
| rs2584662 | rs2671659 | 17:47474529_A_G  | Coronary artery disease                                                                       | EFO_0000378;<br>EFO_0001645                 | 29212778 | Mixed    | -0.032 | 0.007 | 1.30E-05 | 296525 | 34541   | 1         | log OR    | 3.23E-03 |
| rs2584662 | rs2671659 | 17:47474529_A_G  | Self-reported hypertension                                                                    | EFO_0000537                                 | UKBB     | European | -0.005 | 0.001 | 2.82E-05 | 337159 | 87690   | 1         | risk diff | 6.41E-03 |
| rs2584662 | rs2671659 | 17:47474529_A_G  | Medication for cholesterol, blood pressure or diabetes: blood pressure medication             | EFO_0007056                                 | UKBB     | European | -0.007 | 0.002 | 3.10E-05 | 154702 | 38548   | 1         | risk diff | 6.88E-03 |
| rs2584662 | rs2671659 | 17:47474529_A_G  | Mitral annular calcification                                                                  | EFO_0005262                                 | 23388002 | Mixed    | NA     | NA    | 3.15E-05 | 3795   | 568     | 2         | log OR    | 6.96E-03 |
| rs2584662 | rs2671659 | 17:47474529_A_G  | Mitral annular calcium                                                                        | EFO_0005262                                 | 23388002 | Mixed    | NA     | NA    | 3.15E-05 | 6942   | -       | -         | -         | 6.97E-03 |
| rs2584662 | rs2671659 | 17:47474529_A_G  | Number of self-reported non-cancer illnesses                                                  | EFO_0009801                                 | UKBB     | European | -0.009 | 0.002 | 3.27E-05 | 337159 | 0       | 1         | -         | 7.20E-03 |

**e-Table 12: Results of bivariate LD score regression between ACO, asthma, and FEV1/FVC, plus ACO and autoimmune and smoking traits**

ACO=asthma-COPD overlap; FEV1/FVC (meta) = forced expiratory volume in 1 sec to forced vital capacity ratio in meta-analysis of UK Biobank and SpiroMeta (N=400,102); rg=genetic correlation, SE=standard error; P=p-value

| Trait 1                            | Trait 2                     | PMID              | Ethnicity | LD-Hub Notes                                                                                      | rg     | SE    | P         |
|------------------------------------|-----------------------------|-------------------|-----------|---------------------------------------------------------------------------------------------------|--------|-------|-----------|
| <b>Calculated by authors</b>       |                             |                   |           |                                                                                                   |        |       |           |
| Asthma                             | Asthma (moderate-to-severe) | 29273806/30552067 | European  |                                                                                                   | 0.798  | 0.071 | 9.32E-30  |
| Asthma                             | FEV1/FVC (meta)             | 29273806/30804560 | European  |                                                                                                   | -0.333 | 0.035 | 1.04E-21  |
| Asthma (moderate-to-severe)        | FEV1/FVC (meta)             | 30552067/30804560 | European  |                                                                                                   | -0.338 | 0.037 | 1.39E-19  |
| Asthma                             | Eosinophils                 | 29273806/27863252 | European  |                                                                                                   | 0.371  | 0.072 | 3.15E-07  |
| Asthma (moderate-to-severe)        | Eosinophils                 | 30552067/27863252 | European  |                                                                                                   | 0.374  | 0.066 | 1.21E-08  |
| FEV1/FVC (meta)                    | Eosinophils                 | 30804560/27863252 | European  |                                                                                                   | -0.070 | 0.022 | 0.0016    |
| COPD                               | FEV1/FVC (meta)             | 30804561/30804560 | European  |                                                                                                   | -0.842 | 0.014 | 0         |
| COPD                               | Asthma                      | 30804561/29273806 | European  |                                                                                                   | 0.405  | 0.042 | 7.18E-22  |
| COPD                               | Asthma (severe)             | 30804561/30552067 | European  |                                                                                                   | 0.466  | 0.045 | 1.79E-25  |
| COPD                               | Eosinophils                 | 30804561/27863252 | European  |                                                                                                   | 0.130  | 0.029 | 4.83E-06  |
| ACO                                | Eosinophils                 | 27863252          | European  |                                                                                                   | 0.292  | 0.044 | 4.87E-11  |
| ACO                                | Asthma (moderate-to-severe) | 30552067          | European  |                                                                                                   | 0.833  | 0.055 | 2.81E-52  |
| ACO                                | FEV1/FVC (meta)             | 30804560          | European  |                                                                                                   | -0.692 | 0.027 | 1.71E-140 |
| ACO                                | COPD                        | 30804561          | European  |                                                                                                   | 0.828  | 0.022 | 3.19E-299 |
| ACO                                | Asthma                      | 29273806          | European  |                                                                                                   | 0.743  | 0.053 | 6.18E-44  |
| <b>LD-Hub: autoimmune category</b> |                             |                   |           |                                                                                                   |        |       |           |
| ACO                                | Asthma                      | 17611496          | European  |                                                                                                   | 0.778  | 0.087 | 4.54E-19  |
| ACO                                | Eczema                      | 26482879          | Mixed     | Caution: using this data may yield less robust results due to minor departure of the LD structure | 0.255  | 0.088 | 3.70E-03  |

| Trait 1                                   | Trait 2                                                               | PMID     | Ethnicity | LD-Hub Notes                                                                                                               | rg     | SE    | P        |
|-------------------------------------------|-----------------------------------------------------------------------|----------|-----------|----------------------------------------------------------------------------------------------------------------------------|--------|-------|----------|
| ACO                                       | Multiple sclerosis                                                    | 21833088 | European  | Caution: using this data may yield results outside bounds due to relative low Z score of the SNP heritability of the trait | 0.323  | 0.127 | 1.10E-02 |
| ACO                                       | Primary biliary cirrhosis                                             | 26394269 | European  |                                                                                                                            | 0.107  | 0.091 | 2.42E-01 |
| ACO                                       | Primary sclerosing cholangitis                                        | 27992413 | Mixed     | Caution: using this data may yield results outside bounds due to relative low Z score of the SNP heritability of the trait | 0.074  | 0.078 | 3.42E-01 |
| ACO                                       | Ulcerative colitis                                                    | 26192919 | European  |                                                                                                                            | 0.048  | 0.058 | 4.12E-01 |
| ACO                                       | Inflammatory Bowel Disease (Euro)                                     | 26192919 | European  |                                                                                                                            | 0.038  | 0.050 | 4.54E-01 |
| ACO                                       | Celiac disease                                                        | 20190752 | European  |                                                                                                                            | 0.048  | 0.069 | 4.85E-01 |
| ACO                                       | Systemic lupus erythematosus                                          | 26502338 | European  |                                                                                                                            | 0.038  | 0.072 | 5.99E-01 |
| ACO                                       | Crohns disease                                                        | 26192919 | European  |                                                                                                                            | 0.027  | 0.053 | 6.09E-01 |
| ACO                                       | Rheumatoid Arthritis                                                  | 24390342 | European  |                                                                                                                            | 0.009  | 0.056 | 8.80E-01 |
| <b>LD-Hub: UKBB category</b>              |                                                                       |          |           |                                                                                                                            |        |       |          |
| ACO                                       | Medication for cholesterol_blood pressure or diabetes: Insulin        | NA       | European  |                                                                                                                            | 0.158  | 0.125 | 2.04E-01 |
| ACO                                       | Non-cancer illness code_self-reported: ankylosing spondylitis         | NA       | European  |                                                                                                                            | 0.091  | 0.167 | 5.86E-01 |
| ACO                                       | Non-cancer illness code_self-reported: hyperthyroidism/thyrotoxicosis | NA       | European  |                                                                                                                            | 0.033  | 0.087 | 7.02E-01 |
| ACO                                       | Non-cancer illness code_self-reported: hypothyroidism/myxoedema       | NA       | European  |                                                                                                                            | 0.015  | 0.045 | 7.32E-01 |
| ACO                                       | Non-cancer illness code_self-reported: psoriasis                      | NA       | European  |                                                                                                                            | -0.031 | 0.092 | 7.34E-01 |
| <b>LD-Hub: smoking behaviour category</b> |                                                                       |          |           |                                                                                                                            |        |       |          |
| ACO                                       | Ever vs never smoked                                                  | 20418890 | European  |                                                                                                                            | 0.046  | 0.057 | 4.17E-01 |
